# Supplementary material
Source: PubMed Central journal article supplement (PMC7261113)
Supplement: mmc1.pdf [file mmc1.pdf]

SUPPLEMENTARY DATA OF PAPER

**Mathematical modeling of COVID-19 fatality trends:  
death kinetics law versus infection-to-death delay rule**

by Stefan Scheiner, Niketa Ukaj, and Christian Hellmich

Institute for Mechanics of Materials and Structures, Vienna University of Technology (TU Wien),  
Karlsplatz 13/202, 1040 Vienna, Austria

Table 1: Data recorded in Algeria

| Date   | $C$  | $\Delta C$ | $I$  | $\Delta I$ | $F$ | $\Delta F$ | $R$  | $\Delta R$ |
|--------|------|------------|------|------------|-----|------------|------|------------|
| Feb 25 | 1    | 1          | 1    | 1          | 0   | 0          | 0    | 0          |
| Feb 26 | 1    | 0          | 1    | 0          | 0   | 0          | 0    | 0          |
| Feb 27 | 1    | 0          | 1    | 0          | 0   | 0          | 0    | 0          |
| Feb 28 | 1    | 0          | 1    | 0          | 0   | 0          | 0    | 0          |
| Feb 29 | 1    | 0          | 1    | 0          | 0   | 0          | 0    | 0          |
| Mar 1  | 3    | 2          | 3    | 2          | 0   | 0          | 0    | 0          |
| Mar 2  | 5    | 2          | 5    | 2          | 0   | 0          | 0    | 0          |
| Mar 3  | 8    | 3          | 8    | 3          | 0   | 0          | 0    | 0          |
| Mar 4  | 17   | 9          | 17   | 9          | 0   | 0          | 0    | 0          |
| Mar 5  | 17   | 0          | 17   | 0          | 0   | 0          | 0    | 0          |
| Mar 6  | 17   | 0          | 17   | 0          | 0   | 0          | 0    | 0          |
| Mar 7  | 19   | 2          | 19   | 2          | 0   | 0          | 0    | 0          |
| Mar 8  | 20   | 1          | 20   | 1          | 0   | 0          | 0    | 0          |
| Mar 9  | 20   | 0          | 20   | 0          | 0   | 0          | 0    | 0          |
| Mar 10 | 20   | 0          | 20   | 0          | 0   | 0          | 0    | 0          |
| Mar 11 | 20   | 0          | 12   | -8         | 0   | 0          | 8    | 8          |
| Mar 12 | 26   | 6          | 14   | 2          | 2   | 2          | 10   | 2          |
| Mar 13 | 26   | 0          | 14   | 0          | 2   | 0          | 10   | 0          |
| Mar 14 | 39   | 13         | 26   | 12         | 3   | 1          | 10   | 0          |
| Mar 15 | 54   | 15         | 40   | 14         | 4   | 1          | 10   | 0          |
| Mar 16 | 60   | 6          | 46   | 6          | 4   | 0          | 10   | 0          |
| Mar 17 | 61   | 1          | 46   | 0          | 5   | 1          | 10   | 0          |
| Mar 18 | 75   | 14         | 36   | -10        | 7   | 2          | 32   | 22         |
| Mar 19 | 90   | 15         | 49   | 13         | 9   | 2          | 32   | 0          |
| Mar 20 | 94   | 4          | 51   | 2          | 11  | 2          | 32   | 0          |
| Mar 21 | 139  | 45         | 59   | 8          | 15  | 4          | 65   | 33         |
| Mar 22 | 201  | 62         | 119  | 60         | 17  | 2          | 65   | 0          |
| Mar 23 | 230  | 29         | 148  | 29         | 17  | 0          | 65   | 0          |
| Mar 24 | 264  | 34         | 221  | 73         | 19  | 2          | 24   | -41        |
| Mar 25 | 302  | 38         | 216  | -5         | 21  | 2          | 65   | 41         |
| Mar 26 | 367  | 65         | 313  | 97         | 25  | 4          | 29   | -36        |
| Mar 27 | 409  | 42         | 354  | 41         | 26  | 1          | 29   | 0          |
| Mar 28 | 454  | 45         | 394  | 40         | 29  | 3          | 31   | 2          |
| Mar 29 | 511  | 57         | 449  | 55         | 31  | 2          | 31   | 0          |
| Mar 30 | 584  | 73         | 512  | 63         | 35  | 4          | 37   | 6          |
| Mar 31 | 716  | 132        | 626  | 114        | 44  | 9          | 46   | 9          |
| Apr 1  | 847  | 131        | 728  | 102        | 58  | 14         | 61   | 15         |
| Apr 2  | 986  | 139        | 839  | 111        | 86  | 28         | 61   | 0          |
| Apr 3  | 1171 | 185        | 1004 | 165        | 105 | 19         | 62   | 1          |
| Apr 4  | 1251 | 80         | 1031 | 27         | 130 | 25         | 90   | 28         |
| Apr 5  | 1320 | 69         | 1078 | 47         | 152 | 22         | 90   | 0          |
| Apr 6  | 1423 | 103        | 1160 | 82         | 173 | 21         | 90   | 0          |
| Apr 7  | 1468 | 45         | 1162 | 2          | 193 | 20         | 113  | 23         |
| Apr 8  | 1572 | 104        | 1130 | -32        | 205 | 12         | 237  | 124        |
| Apr 9  | 1666 | 94         | 1084 | -46        | 235 | 30         | 347  | 110        |
| Apr 10 | 1761 | 95         | 1100 | 16         | 256 | 21         | 405  | 58         |
| Apr 11 | 1825 | 64         | 1090 | -10        | 275 | 19         | 460  | 55         |
| Apr 12 | 1914 | 89         | 1030 | -60        | 293 | 18         | 591  | 131        |
| Apr 13 | 1983 | 69         | 1069 | 39         | 313 | 20         | 601  | 10         |
| Apr 14 | 2070 | 87         | 1053 | -16        | 326 | 13         | 691  | 90         |
| Apr 15 | 2160 | 90         | 1116 | 63         | 336 | 10         | 708  | 17         |
| Apr 16 | 2268 | 108        | 1137 | 21         | 348 | 12         | 783  | 75         |
| Apr 17 | 2418 | 150        | 1208 | 71         | 364 | 16         | 846  | 63         |
| Apr 18 | 2534 | 116        | 1273 | 65         | 367 | 3          | 894  | 48         |
| Apr 19 | 2629 | 95         | 1207 | -66        | 375 | 8          | 1047 | 153        |
| Apr 20 | 2718 | 89         | 1235 | 28         | 384 | 9          | 1099 | 52         |
| Apr 21 | 2811 | 93         | 1267 | 32         | 392 | 8          | 1152 | 53         |
| Apr 22 | 2910 | 99         | 1304 | 37         | 402 | 10         | 1204 | 52         |
| Apr 23 | 3007 | 97         | 1245 | -59        | 407 | 5          | 1355 | 151        |
| Apr 24 | 3127 | 120        | 1304 | 59         | 415 | 8          | 1408 | 53         |
| Apr 25 | 3256 | 129        | 1358 | 54         | 419 | 4          | 1479 | 71         |
| Apr 26 | 3382 | 126        | 1449 | 91         | 425 | 6          | 1508 | 29         |

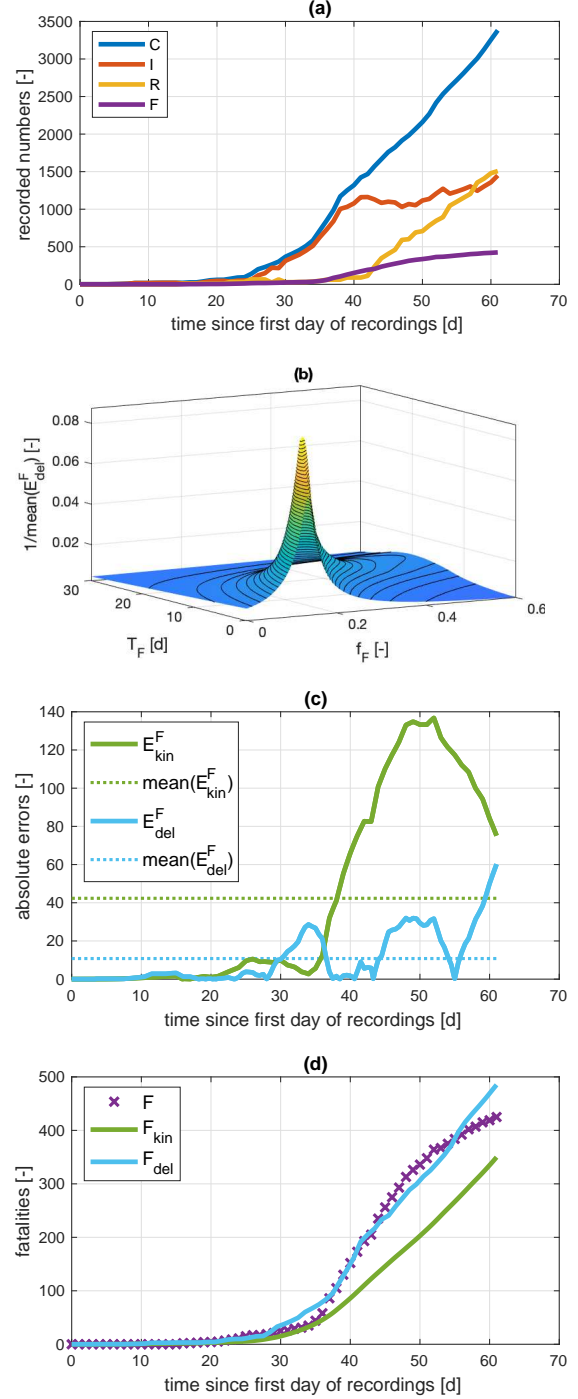

Figure 1: (a) Recorded data, (b) results of optimization based on infection-to-death delay rule, (c) absolute errors based on optimized parameter estimates, and (d) comparison between model-predicted fatalities based on optimized parameter estimates and recorded fatalities for Algeria

Table 2: Data recorded in Argentina

| Date   | $C$  | $\Delta C$ | $I$  | $\Delta I$ | $F$ | $\Delta F$ | $R$  | $\Delta R$ |
|--------|------|------------|------|------------|-----|------------|------|------------|
| Mar 3  | 1    | 1          | 1    | 1          | 0   | 0          | 0    | 0          |
| Mar 4  | 1    | 0          | 1    | 0          | 0   | 0          | 0    | 0          |
| Mar 5  | 2    | 1          | 2    | 1          | 0   | 0          | 0    | 0          |
| Mar 6  | 8    | 6          | 8    | 6          | 0   | 0          | 0    | 0          |
| Mar 7  | 9    | 1          | 8    | 0          | 1   | 1          | 0    | 0          |
| Mar 8  | 12   | 3          | 11   | 3          | 1   | 0          | 0    | 0          |
| Mar 9  | 17   | 5          | 16   | 5          | 1   | 0          | 0    | 0          |
| Mar 10 | 19   | 2          | 18   | 2          | 1   | 0          | 0    | 0          |
| Mar 11 | 21   | 2          | 20   | 2          | 1   | 0          | 0    | 0          |
| Mar 12 | 31   | 10         | 30   | 10         | 1   | 0          | 0    | 0          |
| Mar 13 | 34   | 3          | 32   | 2          | 2   | 1          | 0    | 0          |
| Mar 14 | 45   | 11         | 43   | 11         | 2   | 0          | 0    | 0          |
| Mar 15 | 56   | 11         | 51   | 8          | 2   | 0          | 3    | 3          |
| Mar 16 | 65   | 9          | 60   | 9          | 2   | 0          | 3    | 0          |
| Mar 17 | 79   | 14         | 74   | 14         | 2   | 0          | 3    | 0          |
| Mar 18 | 97   | 18         | 92   | 18         | 2   | 0          | 3    | 0          |
| Mar 19 | 128  | 31         | 122  | 30         | 3   | 1          | 3    | 0          |
| Mar 20 | 158  | 30         | 152  | 30         | 3   | 0          | 3    | 0          |
| Mar 21 | 158  | 0          | 151  | -1         | 4   | 1          | 3    | 0          |
| Mar 22 | 266  | 108        | 235  | 84         | 4   | 0          | 27   | 24         |
| Mar 23 | 301  | 35         | 246  | 11         | 4   | 0          | 51   | 24         |
| Mar 24 | 387  | 86         | 329  | 83         | 6   | 2          | 52   | 1          |
| Mar 25 | 502  | 115        | 442  | 113        | 8   | 2          | 52   | 0          |
| Mar 26 | 589  | 87         | 505  | 63         | 12  | 4          | 72   | 20         |
| Mar 27 | 589  | 0          | 504  | -1         | 13  | 1          | 72   | 0          |
| Mar 28 | 745  | 156        | 654  | 150        | 19  | 6          | 72   | 0          |
| Mar 29 | 820  | 75         | 709  | 55         | 20  | 1          | 91   | 19         |
| Mar 30 | 820  | 0          | 569  | -140       | 23  | 3          | 228  | 137        |
| Mar 31 | 1054 | 234        | 787  | 218        | 27  | 4          | 240  | 12         |
| Apr 1  | 1133 | 79         | 853  | 66         | 32  | 5          | 248  | 8          |
| Apr 2  | 1265 | 132        | 973  | 120        | 36  | 4          | 256  | 8          |
| Apr 3  | 1353 | 88         | 1045 | 72         | 42  | 6          | 266  | 10         |
| Apr 4  | 1451 | 98         | 1129 | 84         | 43  | 1          | 279  | 13         |
| Apr 5  | 1554 | 103        | 1228 | 99         | 46  | 3          | 280  | 1          |
| Apr 6  | 1628 | 74         | 1250 | 22         | 53  | 7          | 325  | 45         |
| Apr 7  | 1715 | 87         | 1317 | 67         | 60  | 7          | 338  | 13         |
| Apr 8  | 1795 | 80         | 1372 | 55         | 65  | 5          | 358  | 20         |
| Apr 9  | 1894 | 99         | 1450 | 78         | 79  | 14         | 365  | 7          |
| Apr 10 | 1975 | 81         | 1518 | 68         | 82  | 3          | 375  | 10         |
| Apr 11 | 2142 | 167        | 1613 | 95         | 89  | 7          | 440  | 65         |
| Apr 12 | 2142 | 0          | 1584 | -29        | 90  | 1          | 468  | 28         |
| Apr 13 | 2277 | 135        | 1664 | 80         | 98  | 8          | 515  | 47         |
| Apr 14 | 2277 | 0          | 1616 | -48        | 102 | 4          | 559  | 44         |
| Apr 15 | 2571 | 294        | 1863 | 247        | 112 | 10         | 596  | 37         |
| Apr 16 | 2669 | 98         | 1916 | 53         | 122 | 10         | 631  | 35         |
| Apr 17 | 2669 | 0          | 1880 | -36        | 123 | 1          | 666  | 35         |
| Apr 18 | 2839 | 170        | 2022 | 142        | 132 | 9          | 685  | 19         |
| Apr 19 | 2941 | 102        | 2098 | 76         | 134 | 2          | 709  | 24         |
| Apr 20 | 3031 | 90         | 2152 | 54         | 142 | 8          | 737  | 28         |
| Apr 21 | 3144 | 113        | 2153 | 1          | 151 | 9          | 840  | 103        |
| Apr 22 | 3288 | 144        | 2257 | 104        | 159 | 8          | 872  | 32         |
| Apr 23 | 3435 | 147        | 2351 | 94         | 165 | 6          | 919  | 47         |
| Apr 24 | 3607 | 172        | 2455 | 104        | 176 | 11         | 976  | 57         |
| Apr 25 | 3780 | 173        | 2565 | 110        | 185 | 9          | 1030 | 54         |
| Apr 26 | 3892 | 112        | 2593 | 28         | 192 | 7          | 1107 | 77         |

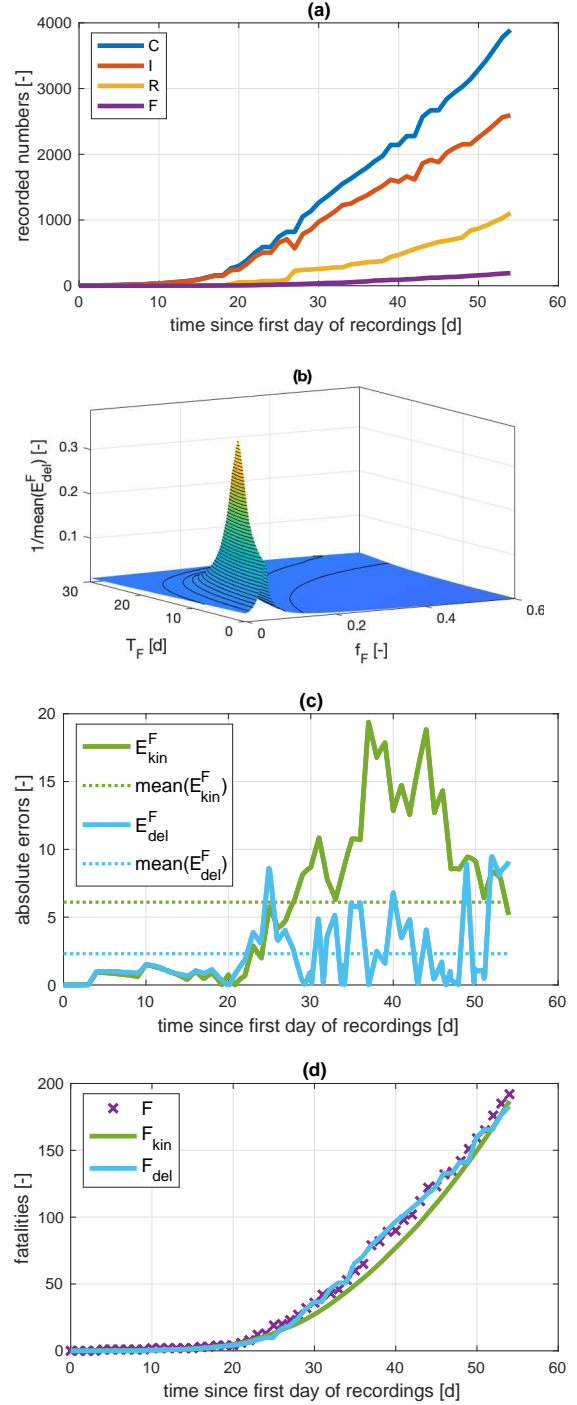

Figure 2: (a) Recorded data, (b) results of optimization based on infection-to-death delay rule, (c) absolute errors based on optimized parameter estimates, and (d) comparison between model-predicted fatalities based on optimized parameter estimates and recorded fatalities for Argentina

Table 3: Data recorded in Australia

| Date   | $C$  | $\Delta C$ | $I$  | $\Delta I$ | $F$ | $\Delta F$ | $R$  | $\Delta R$ |
|--------|------|------------|------|------------|-----|------------|------|------------|
| Feb 15 | 15   | 15         | 5    | 5          | 0   | 0          | 10   | 10         |
| Feb 16 | 15   | 0          | 5    | 0          | 0   | 0          | 10   | 0          |
| Feb 17 | 15   | 0          | 5    | 0          | 0   | 0          | 10   | 0          |
| Feb 18 | 15   | 0          | 5    | 0          | 0   | 0          | 10   | 0          |
| Feb 19 | 15   | 0          | 5    | 0          | 0   | 0          | 10   | 0          |
| Feb 20 | 17   | 2          | 6    | 1          | 0   | 0          | 11   | 1          |
| Feb 21 | 19   | 2          | 8    | 2          | 0   | 0          | 11   | 0          |
| Feb 22 | 21   | 2          | 10   | 2          | 0   | 0          | 11   | 0          |
| Feb 23 | 22   | 1          | 11   | 1          | 0   | 0          | 11   | 0          |
| Feb 24 | 22   | 0          | 11   | 0          | 0   | 0          | 11   | 0          |
| Feb 25 | 22   | 0          | 7    | -4         | 0   | 0          | 15   | 4          |
| Feb 26 | 23   | 1          | 8    | 1          | 0   | 0          | 15   | 0          |
| Feb 27 | 23   | 0          | 8    | 0          | 0   | 0          | 15   | 0          |
| Feb 28 | 25   | 2          | 10   | 2          | 0   | 0          | 15   | 0          |
| Feb 29 | 25   | 0          | 10   | 0          | 0   | 0          | 15   | 0          |
| Mar 1  | 29   | 4          | 13   | 3          | 1   | 1          | 15   | 0          |
| Mar 2  | 33   | 4          | 17   | 4          | 1   | 0          | 15   | 0          |
| Mar 3  | 39   | 6          | 17   | 0          | 1   | 0          | 21   | 6          |
| Mar 4  | 53   | 14         | 30   | 13         | 2   | 1          | 21   | 0          |
| Mar 5  | 60   | 7          | 36   | 6          | 2   | 0          | 22   | 1          |
| Mar 6  | 63   | 3          | 39   | 3          | 2   | 0          | 22   | 0          |
| Mar 7  | 74   | 11         | 49   | 10         | 3   | 1          | 22   | 0          |
| Mar 8  | 83   | 9          | 58   | 9          | 3   | 0          | 22   | 0          |
| Mar 9  | 93   | 10         | 68   | 10         | 3   | 0          | 22   | 0          |
| Mar 10 | 116  | 23         | 91   | 23         | 3   | 0          | 22   | 0          |
| Mar 11 | 128  | 12         | 101  | 10         | 3   | 0          | 24   | 2          |
| Mar 12 | 156  | 28         | 127  | 26         | 3   | 0          | 26   | 2          |
| Mar 13 | 199  | 43         | 170  | 43         | 3   | 0          | 26   | 0          |
| Mar 14 | 248  | 49         | 218  | 48         | 3   | 0          | 27   | 1          |
| Mar 15 | 300  | 52         | 268  | 50         | 5   | 2          | 27   | 0          |
| Mar 16 | 401  | 101        | 369  | 101        | 5   | 0          | 27   | 0          |
| Mar 17 | 455  | 54         | 423  | 54         | 5   | 0          | 27   | 0          |
| Mar 18 | 596  | 141        | 547  | 124        | 6   | 1          | 43   | 16         |
| Mar 19 | 756  | 160        | 703  | 156        | 7   | 1          | 46   | 3          |
| Mar 20 | 928  | 172        | 875  | 172        | 7   | 0          | 46   | 0          |
| Mar 21 | 1072 | 144        | 1019 | 144        | 7   | 0          | 46   | 0          |
| Mar 22 | 1609 | 537        | 1514 | 495        | 7   | 0          | 88   | 42         |
| Mar 23 | 1887 | 278        | 1762 | 248        | 7   | 0          | 118  | 30         |
| Mar 24 | 2317 | 430        | 2191 | 429        | 8   | 1          | 118  | 0          |
| Mar 25 | 2676 | 359        | 2547 | 356        | 11  | 3          | 118  | 0          |
| Mar 26 | 3050 | 374        | 2867 | 320        | 13  | 2          | 170  | 52         |
| Mar 27 | 3378 | 328        | 3195 | 328        | 13  | 0          | 170  | 0          |
| Mar 28 | 3635 | 257        | 3451 | 256        | 14  | 1          | 170  | 0          |
| Mar 29 | 4163 | 528        | 3902 | 451        | 17  | 3          | 244  | 74         |
| Mar 30 | 4460 | 297        | 4197 | 295        | 19  | 2          | 244  | 0          |
| Mar 31 | 4763 | 303        | 4398 | 201        | 20  | 1          | 345  | 101        |
| Apr 1  | 5048 | 285        | 4680 | 282        | 23  | 3          | 345  | 0          |
| Apr 2  | 5314 | 266        | 4704 | 24         | 25  | 2          | 585  | 240        |
| Apr 3  | 5454 | 140        | 4841 | 137        | 28  | 3          | 585  | 0          |
| Apr 4  | 5550 | 96         | 4935 | 94         | 30  | 2          | 585  | 0          |
| Apr 5  | 5750 | 200        | 4633 | -302       | 37  | 7          | 1080 | 495        |
| Apr 6  | 5895 | 145        | 3418 | -1215      | 45  | 8          | 2432 | 1352       |
| Apr 7  | 5988 | 93         | 3392 | -26        | 49  | 4          | 2547 | 115        |
| Apr 8  | 6052 | 64         | 3189 | -203       | 50  | 1          | 2813 | 266        |
| Apr 9  | 6152 | 100        | 3114 | -75        | 51  | 1          | 2987 | 174        |
| Apr 10 | 6238 | 86         | 3043 | -71        | 54  | 3          | 3141 | 154        |
| Apr 11 | 6303 | 65         | 2982 | -61        | 56  | 2          | 3265 | 124        |
| Apr 12 | 6313 | 10         | 2916 | -66        | 59  | 3          | 3338 | 73         |
| Apr 13 | 6359 | 46         | 2804 | -112       | 61  | 2          | 3494 | 156        |
| Apr 14 | 6400 | 41         | 2741 | -63        | 61  | 0          | 3598 | 104        |
| Apr 15 | 6447 | 47         | 2698 | -43        | 63  | 2          | 3686 | 88         |
| Apr 16 | 6468 | 21         | 2658 | -40        | 63  | 0          | 3747 | 61         |
| Apr 17 | 6533 | 65         | 2647 | -11        | 65  | 2          | 3821 | 74         |
| Apr 18 | 6586 | 53         | 2349 | -298       | 70  | 5          | 4167 | 346        |
| Apr 19 | 6612 | 26         | 2311 | -38        | 71  | 1          | 4230 | 63         |
| Apr 20 | 6625 | 13         | 2296 | -15        | 71  | 0          | 4258 | 28         |
| Apr 21 | 6645 | 20         | 1889 | -407       | 71  | 0          | 4685 | 427        |
| Apr 22 | 6649 | 4          | 1655 | -234       | 74  | 3          | 4920 | 235        |
| Apr 23 | 6667 | 18         | 1547 | -108       | 75  | 1          | 5045 | 125        |
| Apr 24 | 6675 | 8          | 1460 | -87        | 79  | 4          | 5136 | 91         |
| Apr 25 | 6695 | 20         | 1243 | -217       | 80  | 1          | 5372 | 236        |
| Apr 26 | 6716 | 21         | 1073 | -170       | 83  | 3          | 5560 | 188        |

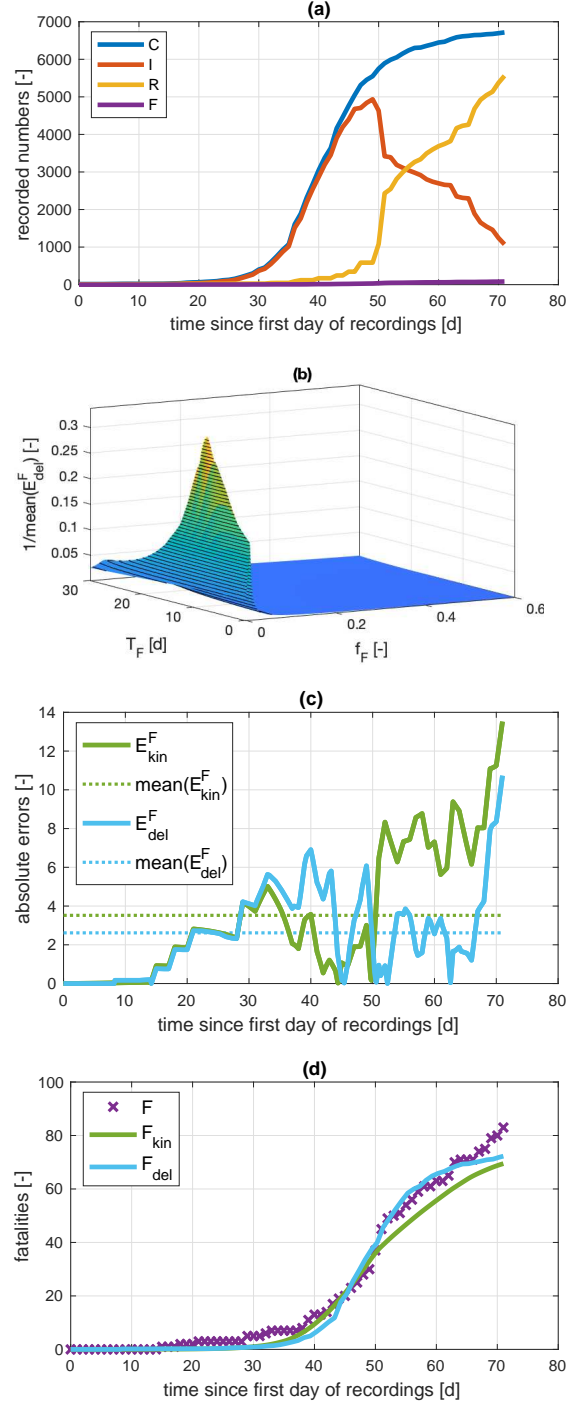

Figure 3: (a) Recorded data, (b) results of optimization based on infection-to-death delay rule, (c) absolute errors based on optimized parameter estimates, and (d) comparison between model-predicted fatalities based on optimized parameter estimates and recorded fatalities for Australia

Table 4: Data recorded in Austria

| Date   | $C$   | $\Delta C$ | $I$  | $\Delta I$ | $F$ | $\Delta F$ | $R$   | $\Delta R$ |
|--------|-------|------------|------|------------|-----|------------|-------|------------|
| Feb 25 | 2     | 2          | 2    | 2          | 0   | 0          | 0     | 0          |
| Feb 26 | 2     | 0          | 2    | 0          | 0   | 0          | 0     | 0          |
| Feb 27 | 5     | 3          | 5    | 3          | 0   | 0          | 0     | 0          |
| Feb 28 | 7     | 2          | 7    | 2          | 0   | 0          | 0     | 0          |
| Feb 29 | 10    | 3          | 10   | 3          | 0   | 0          | 0     | 0          |
| Mar 1  | 14    | 4          | 14   | 4          | 0   | 0          | 0     | 0          |
| Mar 2  | 18    | 4          | 18   | 4          | 0   | 0          | 0     | 0          |
| Mar 3  | 24    | 6          | 24   | 6          | 0   | 0          | 0     | 0          |
| Mar 4  | 29    | 5          | 29   | 5          | 0   | 0          | 0     | 0          |
| Mar 5  | 43    | 14         | 41   | 12         | 0   | 0          | 2     | 2          |
| Mar 6  | 66    | 23         | 64   | 23         | 0   | 0          | 2     | 0          |
| Mar 7  | 81    | 15         | 79   | 15         | 0   | 0          | 2     | 0          |
| Mar 8  | 104   | 23         | 102  | 23         | 0   | 0          | 2     | 0          |
| Mar 9  | 131   | 27         | 129  | 27         | 0   | 0          | 2     | 0          |
| Mar 10 | 182   | 51         | 178  | 49         | 0   | 0          | 4     | 2          |
| Mar 11 | 246   | 64         | 242  | 64         | 0   | 0          | 4     | 0          |
| Mar 12 | 361   | 115        | 356  | 114        | 1   | 1          | 4     | 0          |
| Mar 13 | 504   | 143        | 497  | 141        | 1   | 0          | 6     | 2          |
| Mar 14 | 655   | 151        | 648  | 151        | 1   | 0          | 6     | 0          |
| Mar 15 | 860   | 205        | 853  | 205        | 1   | 0          | 6     | 0          |
| Mar 16 | 1018  | 158        | 1007 | 154        | 3   | 2          | 8     | 2          |
| Mar 17 | 1332  | 314        | 1319 | 312        | 4   | 1          | 9     | 1          |
| Mar 18 | 1646  | 314        | 1633 | 314        | 4   | 0          | 9     | 0          |
| Mar 19 | 2179  | 533        | 2164 | 531        | 6   | 2          | 9     | 0          |
| Mar 20 | 2649  | 470        | 2634 | 470        | 6   | 0          | 9     | 0          |
| Mar 21 | 2992  | 343        | 2975 | 341        | 8   | 2          | 9     | 0          |
| Mar 22 | 3582  | 590        | 3557 | 582        | 16  | 8          | 9     | 0          |
| Mar 23 | 4474  | 892        | 4444 | 887        | 21  | 5          | 9     | 0          |
| Mar 24 | 5283  | 809        | 5246 | 802        | 28  | 7          | 9     | 0          |
| Mar 25 | 5588  | 305        | 5548 | 302        | 31  | 3          | 9     | 0          |
| Mar 26 | 6909  | 1321       | 6748 | 1200       | 49  | 18         | 112   | 103        |
| Mar 27 | 7697  | 788        | 7414 | 666        | 58  | 9          | 225   | 113        |
| Mar 28 | 8271  | 574        | 7978 | 564        | 68  | 10         | 225   | 0          |
| Mar 29 | 8788  | 517        | 8223 | 245        | 86  | 18         | 479   | 254        |
| Mar 30 | 9618  | 830        | 8874 | 651        | 108 | 22         | 636   | 157        |
| Mar 31 | 10180 | 562        | 8957 | 83         | 128 | 20         | 1095  | 459        |
| Apr 1  | 10711 | 531        | 9129 | 172        | 146 | 18         | 1436  | 341        |
| Apr 2  | 11129 | 418        | 9222 | 93         | 158 | 12         | 1749  | 313        |
| Apr 3  | 11524 | 395        | 9334 | 112        | 168 | 10         | 2022  | 273        |
| Apr 4  | 11781 | 257        | 9088 | -246       | 186 | 18         | 2507  | 485        |
| Apr 5  | 12051 | 270        | 8849 | -239       | 204 | 18         | 2998  | 491        |
| Apr 6  | 12297 | 246        | 8614 | -235       | 220 | 16         | 3463  | 465        |
| Apr 7  | 12639 | 342        | 8350 | -264       | 243 | 23         | 4046  | 583        |
| Apr 8  | 12942 | 303        | 8157 | -193       | 273 | 30         | 4512  | 466        |
| Apr 9  | 13244 | 302        | 7709 | -448       | 295 | 22         | 5240  | 728        |
| Apr 10 | 13560 | 316        | 7177 | -532       | 319 | 24         | 6064  | 824        |
| Apr 11 | 13806 | 246        | 6865 | -312       | 337 | 18         | 6604  | 540        |
| Apr 12 | 13945 | 139        | 6608 | -257       | 350 | 13         | 6987  | 383        |
| Apr 13 | 14041 | 96         | 6330 | -278       | 368 | 18         | 7343  | 356        |
| Apr 14 | 14226 | 185        | 6209 | -121       | 384 | 16         | 7633  | 290        |
| Apr 15 | 14350 | 124        | 5859 | -350       | 393 | 9          | 8098  | 465        |
| Apr 16 | 14476 | 126        | 5080 | -779       | 410 | 17         | 8986  | 888        |
| Apr 17 | 14595 | 119        | 4460 | -620       | 431 | 21         | 9704  | 718        |
| Apr 18 | 14671 | 76         | 4014 | -446       | 443 | 12         | 10214 | 510        |
| Apr 19 | 14749 | 78         | 3796 | -218       | 452 | 9          | 10501 | 287        |
| Apr 20 | 14795 | 46         | 3694 | -102       | 470 | 18         | 10631 | 130        |
| Apr 21 | 14873 | 78         | 3411 | -283       | 491 | 21         | 10971 | 340        |
| Apr 22 | 14925 | 52         | 3087 | -324       | 510 | 19         | 11328 | 357        |
| Apr 23 | 15002 | 77         | 2786 | -301       | 522 | 12         | 11694 | 366        |
| Apr 24 | 15071 | 69         | 2669 | -117       | 530 | 8          | 11872 | 178        |
| Apr 25 | 15148 | 77         | 2509 | -160       | 536 | 6          | 12103 | 231        |
| Apr 26 | 15225 | 77         | 2401 | -108       | 542 | 6          | 12282 | 179        |

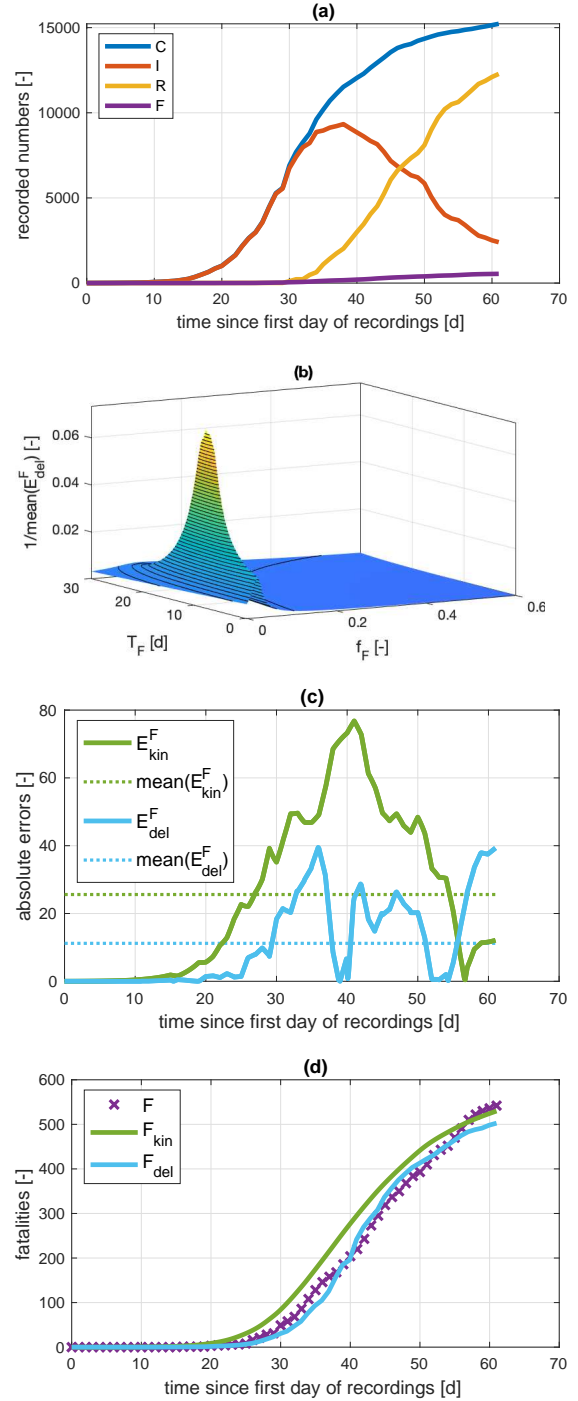

Figure 4: (a) Recorded data, (b) results of optimization based on infection-to-death delay rule, (c) absolute errors based on optimized parameter estimates, and (d) comparison between model-predicted fatalities based on optimized parameter estimates and recorded fatalities for Austria

Table 5: Data recorded in Bangladesh

| Date   | $C$  | $\Delta C$ | $I$  | $\Delta I$ | $F$ | $\Delta F$ | $R$ | $\Delta R$ |
|--------|------|------------|------|------------|-----|------------|-----|------------|
| Mar 8  | 3    | 3          | 3    | 3          | 0   | 0          | 0   | 0          |
| Mar 9  | 3    | 0          | 3    | 0          | 0   | 0          | 0   | 0          |
| Mar 10 | 3    | 0          | 3    | 0          | 0   | 0          | 0   | 0          |
| Mar 11 | 3    | 0          | 3    | 0          | 0   | 0          | 0   | 0          |
| Mar 12 | 3    | 0          | 3    | 0          | 0   | 0          | 0   | 0          |
| Mar 13 | 3    | 0          | 2    | -1         | 0   | 0          | 1   | 1          |
| Mar 14 | 5    | 2          | 3    | 1          | 0   | 0          | 2   | 1          |
| Mar 15 | 5    | 0          | 3    | 0          | 0   | 0          | 2   | 0          |
| Mar 16 | 8    | 3          | 5    | 2          | 0   | 0          | 3   | 1          |
| Mar 17 | 10   | 2          | 7    | 2          | 0   | 0          | 3   | 0          |
| Mar 18 | 14   | 4          | 10   | 3          | 1   | 1          | 3   | 0          |
| Mar 19 | 18   | 4          | 14   | 4          | 1   | 0          | 3   | 0          |
| Mar 20 | 20   | 2          | 16   | 2          | 1   | 0          | 3   | 0          |
| Mar 21 | 24   | 4          | 19   | 3          | 2   | 1          | 3   | 0          |
| Mar 22 | 27   | 3          | 22   | 3          | 2   | 0          | 3   | 0          |
| Mar 23 | 33   | 6          | 25   | 3          | 3   | 1          | 5   | 2          |
| Mar 24 | 39   | 6          | 30   | 5          | 4   | 1          | 5   | 0          |
| Mar 25 | 39   | 0          | 27   | -3         | 5   | 1          | 7   | 2          |
| Mar 26 | 44   | 5          | 28   | 1          | 5   | 0          | 11  | 4          |
| Mar 27 | 48   | 4          | 32   | 4          | 5   | 0          | 11  | 0          |
| Mar 28 | 48   | 0          | 28   | -4         | 5   | 0          | 15  | 4          |
| Mar 29 | 48   | 0          | 28   | 0          | 5   | 0          | 15  | 0          |
| Mar 30 | 49   | 1          | 25   | -3         | 5   | 0          | 19  | 4          |
| Mar 31 | 51   | 2          | 21   | -4         | 5   | 0          | 25  | 6          |
| Apr 1  | 54   | 3          | 23   | 2          | 6   | 1          | 25  | 0          |
| Apr 2  | 56   | 2          | 25   | 2          | 6   | 0          | 25  | 0          |
| Apr 3  | 61   | 5          | 29   | 4          | 6   | 0          | 26  | 1          |
| Apr 4  | 70   | 9          | 32   | 3          | 8   | 2          | 30  | 4          |
| Apr 5  | 88   | 18         | 46   | 14         | 9   | 1          | 33  | 3          |
| Apr 6  | 123  | 35         | 78   | 32         | 12  | 3          | 33  | 0          |
| Apr 7  | 164  | 41         | 114  | 36         | 17  | 5          | 33  | 0          |
| Apr 8  | 218  | 54         | 165  | 51         | 20  | 3          | 33  | 0          |
| Apr 9  | 330  | 112        | 276  | 111        | 21  | 1          | 33  | 0          |
| Apr 10 | 424  | 94         | 364  | 88         | 27  | 6          | 33  | 0          |
| Apr 11 | 482  | 58         | 416  | 52         | 30  | 3          | 36  | 3          |
| Apr 12 | 621  | 139        | 548  | 132        | 34  | 4          | 39  | 3          |
| Apr 13 | 803  | 182        | 722  | 174        | 39  | 5          | 42  | 3          |
| Apr 14 | 1012 | 209        | 924  | 202        | 46  | 7          | 42  | 0          |
| Apr 15 | 1231 | 219        | 1132 | 208        | 50  | 4          | 49  | 7          |
| Apr 16 | 1572 | 341        | 1463 | 331        | 60  | 10         | 49  | 0          |
| Apr 17 | 1838 | 266        | 1705 | 242        | 75  | 15         | 58  | 9          |
| Apr 18 | 2144 | 306        | 1994 | 289        | 84  | 9          | 66  | 8          |
| Apr 19 | 2456 | 312        | 2290 | 296        | 91  | 7          | 75  | 9          |
| Apr 20 | 2948 | 492        | 2762 | 472        | 101 | 10         | 85  | 10         |
| Apr 21 | 3382 | 434        | 3185 | 423        | 110 | 9          | 87  | 2          |
| Apr 22 | 3772 | 390        | 3560 | 375        | 120 | 10         | 92  | 5          |
| Apr 23 | 4186 | 414        | 3951 | 391        | 127 | 7          | 108 | 16         |
| Apr 24 | 4689 | 503        | 4446 | 495        | 131 | 4          | 112 | 4          |
| Apr 25 | 4998 | 309        | 4745 | 299        | 140 | 9          | 113 | 1          |
| Apr 26 | 5416 | 418        | 5149 | 404        | 145 | 5          | 122 | 9          |

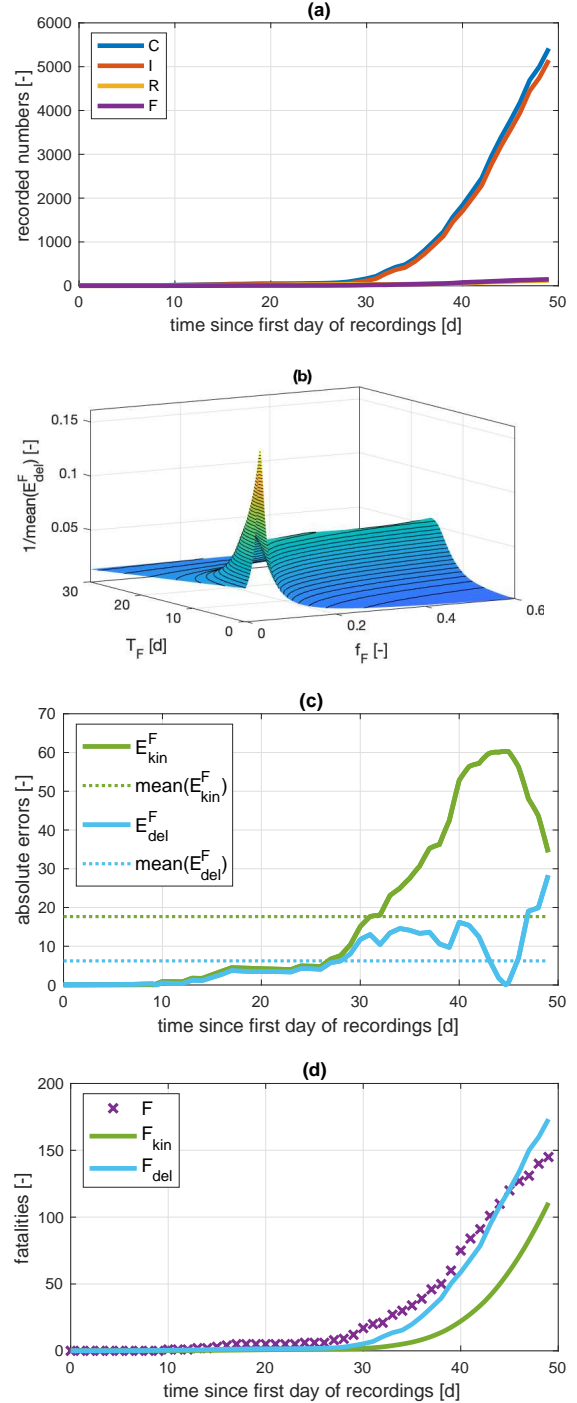

Figure 5: (a) Recorded data, (b) results of optimization based on infection-to-death delay rule, (c) absolute errors based on optimized parameter estimates, and (d) comparison between model-predicted fatalities based on optimized parameter estimates and recorded fatalities for Bangladesh

Table 6: Data recorded in Belgium

| Date   | $C$   | $\Delta C$ | $I$   | $\Delta I$ | $F$  | $\Delta F$ | $R$   | $\Delta R$ |
|--------|-------|------------|-------|------------|------|------------|-------|------------|
| Feb 15 | 1     | 1          | 0     | 0          | 0    | 0          | 1     | 1          |
| Feb 16 | 1     | 0          | 0     | 0          | 0    | 0          | 1     | 0          |
| Feb 17 | 1     | 0          | 0     | 0          | 0    | 0          | 1     | 0          |
| Feb 18 | 1     | 0          | 0     | 0          | 0    | 0          | 1     | 0          |
| Feb 19 | 1     | 0          | 0     | 0          | 0    | 0          | 1     | 0          |
| Feb 20 | 1     | 0          | 0     | 0          | 0    | 0          | 1     | 0          |
| Feb 21 | 1     | 0          | 0     | 0          | 0    | 0          | 1     | 0          |
| Feb 22 | 1     | 0          | 0     | 0          | 0    | 0          | 1     | 0          |
| Feb 23 | 1     | 0          | 0     | 0          | 0    | 0          | 1     | 0          |
| Feb 24 | 1     | 0          | 0     | 0          | 0    | 0          | 1     | 0          |
| Feb 25 | 1     | 0          | 0     | 0          | 0    | 0          | 1     | 0          |
| Feb 26 | 1     | 0          | 0     | 0          | 0    | 0          | 1     | 0          |
| Feb 27 | 1     | 0          | 0     | 0          | 0    | 0          | 1     | 0          |
| Feb 28 | 1     | 0          | 0     | 0          | 0    | 0          | 1     | 0          |
| Feb 29 | 1     | 0          | 0     | 0          | 0    | 0          | 1     | 0          |
| Mar 1  | 2     | 1          | 1     | 1          | 0    | 0          | 1     | 0          |
| Mar 2  | 8     | 6          | 7     | 6          | 0    | 0          | 1     | 0          |
| Mar 3  | 15    | 7          | 14    | 7          | 0    | 0          | 1     | 0          |
| Mar 4  | 23    | 8          | 22    | 8          | 0    | 0          | 1     | 0          |
| Mar 5  | 50    | 27         | 49    | 27         | 0    | 0          | 1     | 0          |
| Mar 6  | 109   | 59         | 108   | 59         | 0    | 0          | 1     | 0          |
| Mar 7  | 169   | 60         | 168   | 60         | 0    | 0          | 1     | 0          |
| Mar 8  | 200   | 31         | 199   | 31         | 0    | 0          | 1     | 0          |
| Mar 9  | 239   | 39         | 238   | 39         | 0    | 0          | 1     | 0          |
| Mar 10 | 267   | 28         | 266   | 28         | 0    | 0          | 1     | 0          |
| Mar 11 | 314   | 47         | 310   | 44         | 3    | 3          | 1     | 0          |
| Mar 12 | 399   | 85         | 395   | 85         | 3    | 0          | 1     | 0          |
| Mar 13 | 559   | 160        | 555   | 160        | 3    | 0          | 1     | 0          |
| Mar 14 | 689   | 130        | 684   | 129        | 4    | 1          | 1     | 0          |
| Mar 15 | 886   | 197        | 881   | 197        | 4    | 0          | 1     | 0          |
| Mar 16 | 1058  | 172        | 1047  | 166        | 10   | 6          | 1     | 0          |
| Mar 17 | 1243  | 185        | 1219  | 172        | 10   | 0          | 14    | 13         |
| Mar 18 | 1486  | 243        | 1441  | 222        | 14   | 4          | 31    | 17         |
| Mar 19 | 1795  | 309        | 1609  | 168        | 21   | 7          | 165   | 134        |
| Mar 20 | 2257  | 462        | 2016  | 407        | 37   | 16         | 204   | 39         |
| Mar 21 | 2815  | 558        | 2485  | 469        | 67   | 30         | 263   | 59         |
| Mar 22 | 3401  | 586        | 3063  | 578        | 75   | 8          | 263   | 0          |
| Mar 23 | 3743  | 342        | 3254  | 191        | 88   | 13         | 401   | 138        |
| Mar 24 | 4269  | 526        | 3686  | 432        | 122  | 34         | 461   | 60         |
| Mar 25 | 4937  | 668        | 4212  | 526        | 178  | 56         | 547   | 86         |
| Mar 26 | 6235  | 1298       | 5340  | 1128       | 220  | 42         | 675   | 128        |
| Mar 27 | 7284  | 1049       | 6137  | 797        | 289  | 69         | 858   | 183        |
| Mar 28 | 9134  | 1850       | 7718  | 1581       | 353  | 64         | 1063  | 205        |
| Mar 29 | 10836 | 1702       | 9046  | 1328       | 431  | 78         | 1359  | 296        |
| Mar 30 | 11899 | 1063       | 9859  | 813        | 513  | 82         | 1527  | 168        |
| Mar 31 | 12775 | 876        | 10374 | 515        | 705  | 192        | 1696  | 169        |
| Apr 1  | 13964 | 1189       | 11004 | 630        | 828  | 123        | 2132  | 436        |
| Apr 2  | 15348 | 1384       | 11842 | 838        | 1011 | 183        | 2495  | 363        |
| Apr 3  | 16770 | 1422       | 12755 | 913        | 1143 | 132        | 2872  | 377        |
| Apr 4  | 18431 | 1661       | 13901 | 1146       | 1283 | 140        | 3247  | 375        |
| Apr 5  | 19691 | 1260       | 14493 | 592        | 1447 | 164        | 3751  | 504        |
| Apr 6  | 20814 | 1123       | 15196 | 703        | 1632 | 185        | 3986  | 235        |
| Apr 7  | 22194 | 1380       | 16002 | 806        | 2035 | 403        | 4157  | 171        |
| Apr 8  | 23403 | 1209       | 16482 | 480        | 2240 | 205        | 4681  | 524        |
| Apr 9  | 24983 | 1580       | 17296 | 814        | 2523 | 283        | 5164  | 483        |
| Apr 10 | 26667 | 1684       | 18080 | 784        | 3019 | 496        | 5568  | 404        |
| Apr 11 | 28018 | 1351       | 18686 | 606        | 3346 | 327        | 5986  | 418        |
| Apr 12 | 29647 | 1629       | 19584 | 898        | 3600 | 254        | 6463  | 477        |
| Apr 13 | 30589 | 942        | 19979 | 395        | 3903 | 303        | 6707  | 244        |
| Apr 14 | 31119 | 530        | 20094 | 115        | 4157 | 254        | 6868  | 161        |
| Apr 15 | 33573 | 2454       | 22026 | 1932       | 4440 | 283        | 7107  | 239        |
| Apr 16 | 34809 | 1236       | 22390 | 364        | 4857 | 417        | 7562  | 455        |
| Apr 17 | 36138 | 1329       | 23014 | 624        | 5163 | 306        | 7961  | 399        |
| Apr 18 | 37183 | 1045       | 23382 | 368        | 5453 | 290        | 8348  | 387        |
| Apr 19 | 38496 | 1313       | 24056 | 674        | 5683 | 230        | 8757  | 409        |
| Apr 20 | 39983 | 1487       | 25260 | 1204       | 5828 | 145        | 8895  | 138        |
| Apr 21 | 40956 | 973        | 25956 | 696        | 5998 | 170        | 9002  | 107        |
| Apr 22 | 41889 | 933        | 26194 | 238        | 6262 | 264        | 9433  | 431        |
| Apr 23 | 42797 | 908        | 26507 | 313        | 6490 | 228        | 9800  | 367        |
| Apr 24 | 44293 | 1496       | 27492 | 985        | 6679 | 189        | 10122 | 322        |
| Apr 25 | 45325 | 1032       | 27991 | 499        | 6917 | 238        | 10417 | 295        |
| Apr 26 | 46134 | 809        | 28255 | 264        | 7094 | 177        | 10785 | 368        |

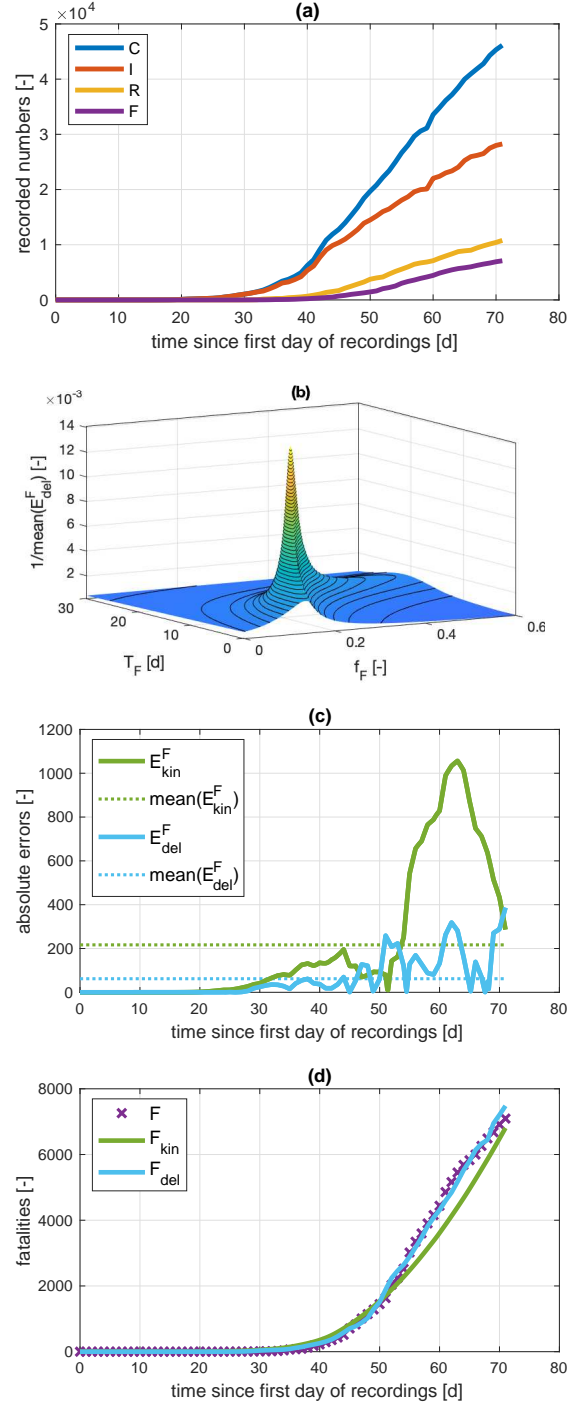

Figure 6: (a) Recorded data, (b) results of optimization based on infection-to-death delay rule, (c) absolute errors based on optimized parameter estimates, and (d) comparison between model-predicted fatalities based on optimized parameter estimates and recorded fatalities for Belgium



Table 7: Data recorded in Brazil

| Date   | $C$   | $\Delta C$ | $I$   | $\Delta I$ | $F$  | $\Delta F$ | $R$   | $\Delta R$ |
|--------|-------|------------|-------|------------|------|------------|-------|------------|
| Feb 25 | 1     | 1          | 1     | 1          | 0    | 0          | 0     | 0          |
| Feb 26 | 1     | 0          | 1     | 0          | 0    | 0          | 0     | 0          |
| Feb 27 | 1     | 0          | 1     | 0          | 0    | 0          | 0     | 0          |
| Feb 28 | 1     | 0          | 1     | 0          | 0    | 0          | 0     | 0          |
| Feb 29 | 2     | 1          | 2     | 1          | 0    | 0          | 0     | 0          |
| Mar 1  | 2     | 0          | 2     | 0          | 0    | 0          | 0     | 0          |
| Mar 2  | 2     | 0          | 2     | 0          | 0    | 0          | 0     | 0          |
| Mar 3  | 2     | 0          | 2     | 0          | 0    | 0          | 0     | 0          |
| Mar 4  | 3     | 1          | 3     | 1          | 0    | 0          | 0     | 0          |
| Mar 5  | 8     | 5          | 8     | 5          | 0    | 0          | 0     | 0          |
| Mar 6  | 13    | 5          | 13    | 5          | 0    | 0          | 0     | 0          |
| Mar 7  | 19    | 6          | 19    | 6          | 0    | 0          | 0     | 0          |
| Mar 8  | 25    | 6          | 25    | 6          | 0    | 0          | 0     | 0          |
| Mar 9  | 25    | 0          | 25    | 0          | 0    | 0          | 0     | 0          |
| Mar 10 | 34    | 9          | 34    | 9          | 0    | 0          | 0     | 0          |
| Mar 11 | 52    | 18         | 52    | 18         | 0    | 0          | 0     | 0          |
| Mar 12 | 77    | 25         | 77    | 25         | 0    | 0          | 0     | 0          |
| Mar 13 | 151   | 74         | 150   | 73         | 0    | 0          | 1     | 1          |
| Mar 14 | 151   | 0          | 150   | 0          | 0    | 0          | 1     | 0          |
| Mar 15 | 200   | 49         | 198   | 48         | 0    | 0          | 2     | 1          |
| Mar 16 | 234   | 34         | 232   | 34         | 0    | 0          | 2     | 0          |
| Mar 17 | 346   | 112        | 343   | 111        | 1    | 1          | 2     | 0          |
| Mar 18 | 529   | 183        | 523   | 180        | 4    | 3          | 2     | 0          |
| Mar 19 | 640   | 111        | 631   | 108        | 7    | 3          | 2     | 0          |
| Mar 20 | 970   | 330        | 957   | 326        | 11   | 4          | 2     | 0          |
| Mar 21 | 1178  | 208        | 1158  | 201        | 18   | 7          | 2     | 0          |
| Mar 22 | 1546  | 368        | 1519  | 361        | 25   | 7          | 2     | 0          |
| Mar 23 | 1924  | 378        | 1888  | 369        | 34   | 9          | 2     | 0          |
| Mar 24 | 2247  | 323        | 2199  | 311        | 46   | 12         | 2     | 0          |
| Mar 25 | 2554  | 307        | 2493  | 294        | 59   | 13         | 2     | 0          |
| Mar 26 | 2985  | 431        | 2902  | 409        | 77   | 18         | 6     | 4          |
| Mar 27 | 3417  | 432        | 3319  | 417        | 92   | 15         | 6     | 0          |
| Mar 28 | 3904  | 487        | 3784  | 465        | 114  | 22         | 6     | 0          |
| Mar 29 | 4256  | 352        | 4114  | 330        | 136  | 22         | 6     | 0          |
| Mar 30 | 4630  | 374        | 4347  | 233        | 163  | 27         | 120   | 114        |
| Mar 31 | 5717  | 1087       | 5389  | 1042       | 201  | 38         | 127   | 7          |
| Apr 1  | 6880  | 1163       | 6511  | 1122       | 242  | 41         | 127   | 0          |
| Apr 2  | 8044  | 1164       | 7593  | 1082       | 324  | 82         | 127   | 0          |
| Apr 3  | 9194  | 1150       | 8704  | 1111       | 363  | 39         | 127   | 0          |
| Apr 4  | 10360 | 1166       | 9788  | 1084       | 445  | 82         | 127   | 0          |
| Apr 5  | 11254 | 894        | 10641 | 853        | 486  | 41         | 127   | 0          |
| Apr 6  | 12183 | 929        | 11492 | 851        | 564  | 78         | 127   | 0          |
| Apr 7  | 14034 | 1851       | 13221 | 1729       | 686  | 122        | 127   | 0          |
| Apr 8  | 16188 | 2154       | 15241 | 2020       | 820  | 134        | 127   | 0          |
| Apr 9  | 18145 | 1957       | 17018 | 1777       | 954  | 134        | 173   | 46         |
| Apr 10 | 19789 | 1644       | 18548 | 1530       | 1068 | 114        | 173   | 0          |
| Apr 11 | 20962 | 1173       | 19649 | 1101       | 1140 | 72         | 173   | 0          |
| Apr 12 | 22192 | 1230       | 20796 | 1147       | 1223 | 83         | 173   | 0          |
| Apr 13 | 23430 | 1238       | 21929 | 1133       | 1328 | 105        | 173   | 0          |
| Apr 14 | 25262 | 1832       | 9704  | -12225     | 1532 | 204        | 14026 | 13853      |
| Apr 15 | 28610 | 3348       | 12827 | 3123       | 1757 | 225        | 14026 | 0          |
| Apr 16 | 30683 | 2073       | 14710 | 1883       | 1947 | 190        | 14026 | 0          |
| Apr 17 | 33682 | 2999       | 17515 | 2805       | 2141 | 194        | 14026 | 0          |
| Apr 18 | 36722 | 3040       | 20335 | 2820       | 2361 | 220        | 14026 | 0          |
| Apr 19 | 38654 | 1932       | 14062 | -6273      | 2462 | 101        | 22130 | 8104       |
| Apr 20 | 40743 | 2089       | 16026 | 1964       | 2587 | 125        | 22130 | 0          |
| Apr 21 | 43079 | 2336       | 16013 | -13        | 2741 | 154        | 24325 | 2195       |
| Apr 22 | 45757 | 2678       | 17533 | 1520       | 2906 | 165        | 25318 | 993        |
| Apr 23 | 49492 | 3735       | 19606 | 2073       | 3313 | 407        | 26573 | 1255       |
| Apr 24 | 52995 | 3503       | 21670 | 2064       | 3670 | 357        | 27655 | 1082       |
| Apr 25 | 59196 | 6201       | 25991 | 4321       | 4045 | 375        | 29160 | 1505       |
| Apr 26 | 62859 | 3663       | 28436 | 2445       | 4271 | 226        | 30152 | 992        |

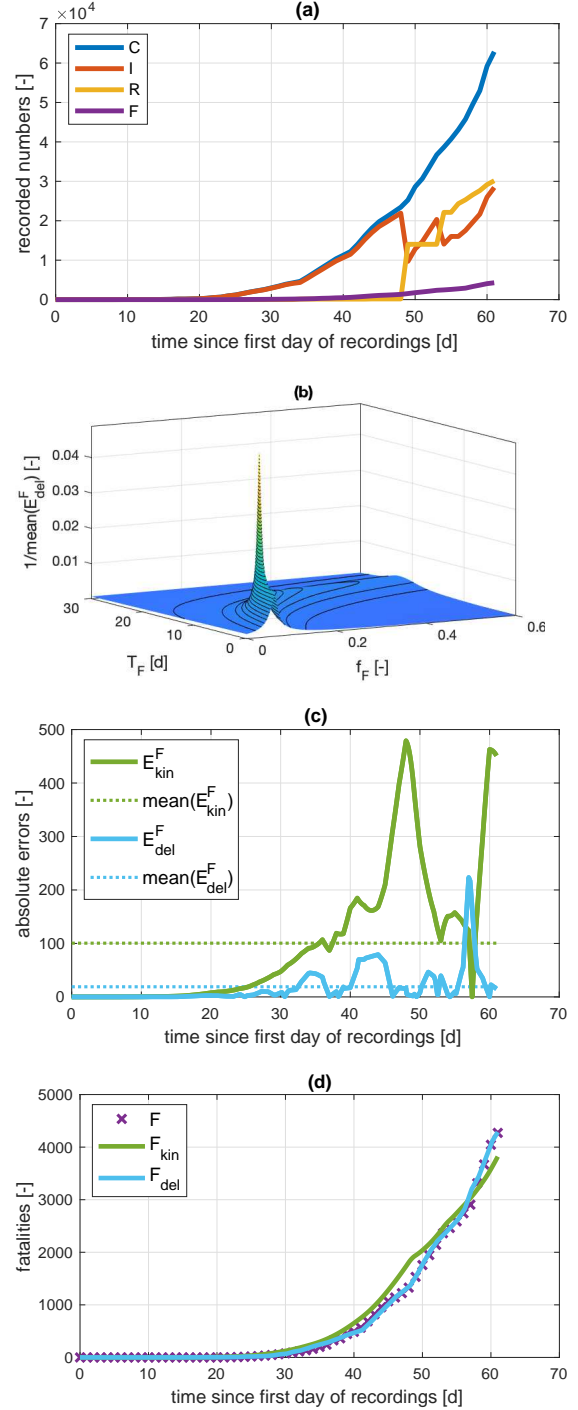

Figure 7: (a) Recorded data, (b) results of optimization based on infection-to-death delay rule, (c) absolute errors based on optimized parameter estimates, and (d) comparison between model-predicted fatalities based on optimized parameter estimates and recorded fatalities for Brazil



Table 8: Data recorded in Canada

| Date   | $C$   | $\Delta C$ | $I$   | $\Delta I$ | $F$  | $\Delta F$ | $R$   | $\Delta R$ |
|--------|-------|------------|-------|------------|------|------------|-------|------------|
| Feb 15 | 8     | 8          | 7     | 7          | 0    | 0          | 1     | 1          |
| Feb 16 | 8     | 0          | 7     | 0          | 0    | 0          | 1     | 0          |
| Feb 17 | 8     | 0          | 7     | 0          | 0    | 0          | 1     | 0          |
| Feb 18 | 8     | 0          | 7     | 0          | 0    | 0          | 1     | 0          |
| Feb 19 | 8     | 0          | 7     | 0          | 0    | 0          | 1     | 0          |
| Feb 20 | 8     | 0          | 6     | -1         | 0    | 0          | 2     | 1          |
| Feb 21 | 9     | 1          | 6     | 0          | 0    | 0          | 3     | 1          |
| Feb 22 | 9     | 0          | 6     | 0          | 0    | 0          | 3     | 0          |
| Feb 23 | 10    | 1          | 7     | 1          | 0    | 0          | 3     | 0          |
| Feb 24 | 11    | 1          | 8     | 1          | 0    | 0          | 3     | 0          |
| Feb 25 | 11    | 0          | 8     | 0          | 0    | 0          | 3     | 0          |
| Feb 26 | 12    | 1          | 9     | 1          | 0    | 0          | 3     | 0          |
| Feb 27 | 14    | 2          | 11    | 2          | 0    | 0          | 3     | 0          |
| Feb 28 | 15    | 1          | 12    | 1          | 0    | 0          | 3     | 0          |
| Feb 29 | 20    | 5          | 16    | 4          | 0    | 0          | 4     | 1          |
| Mar 1  | 24    | 4          | 20    | 4          | 0    | 0          | 4     | 0          |
| Mar 2  | 27    | 3          | 20    | 0          | 0    | 0          | 7     | 3          |
| Mar 3  | 30    | 3          | 23    | 3          | 0    | 0          | 7     | 0          |
| Mar 4  | 34    | 4          | 27    | 4          | 0    | 0          | 7     | 0          |
| Mar 5  | 37    | 3          | 29    | 2          | 0    | 0          | 8     | 1          |
| Mar 6  | 54    | 17         | 46    | 17         | 0    | 0          | 8     | 0          |
| Mar 7  | 60    | 6          | 52    | 6          | 0    | 0          | 8     | 0          |
| Mar 8  | 66    | 6          | 58    | 6          | 0    | 0          | 8     | 0          |
| Mar 9  | 77    | 11         | 68    | 10         | 1    | 1          | 8     | 0          |
| Mar 10 | 95    | 18         | 86    | 18         | 1    | 0          | 8     | 0          |
| Mar 11 | 110   | 15         | 100   | 14         | 1    | 0          | 9     | 1          |
| Mar 12 | 142   | 32         | 130   | 30         | 1    | 0          | 11    | 2          |
| Mar 13 | 198   | 56         | 186   | 56         | 1    | 0          | 11    | 0          |
| Mar 14 | 252   | 54         | 240   | 54         | 1    | 0          | 11    | 0          |
| Mar 15 | 341   | 89         | 329   | 89         | 1    | 0          | 11    | 0          |
| Mar 16 | 441   | 100        | 426   | 97         | 4    | 3          | 11    | 0          |
| Mar 17 | 598   | 157        | 578   | 152        | 8    | 4          | 12    | 1          |
| Mar 18 | 727   | 129        | 706   | 128        | 9    | 1          | 12    | 0          |
| Mar 19 | 873   | 146        | 850   | 144        | 12   | 3          | 11    | -1         |
| Mar 20 | 1087  | 214        | 1061  | 211        | 12   | 0          | 14    | 3          |
| Mar 21 | 1328  | 241        | 1295  | 234        | 19   | 7          | 14    | 0          |
| Mar 22 | 1470  | 142        | 1436  | 141        | 20   | 1          | 14    | 0          |
| Mar 23 | 2091  | 621        | 1747  | 311        | 24   | 4          | 320   | 306        |
| Mar 24 | 2792  | 701        | 2654  | 907        | 26   | 2          | 112   | -208       |
| Mar 25 | 3409  | 617        | 3188  | 534        | 36   | 10         | 185   | 73         |
| Mar 26 | 4043  | 634        | 3776  | 588        | 39   | 3          | 228   | 43         |
| Mar 27 | 4757  | 714        | 4348  | 572        | 55   | 16         | 354   | 126        |
| Mar 28 | 5655  | 898        | 5199  | 851        | 60   | 5          | 396   | 42         |
| Mar 29 | 6320  | 665        | 5682  | 483        | 65   | 5          | 573   | 177        |
| Mar 30 | 7448  | 1128       | 6266  | 584        | 89   | 24         | 1093  | 520        |
| Mar 31 | 8612  | 1164       | 7269  | 1003       | 101  | 12         | 1242  | 149        |
| Apr 1  | 9731  | 1119       | 7881  | 612        | 114  | 13         | 1736  | 494        |
| Apr 2  | 11283 | 1552       | 9131  | 1250       | 173  | 59         | 1979  | 243        |
| Apr 3  | 12375 | 1092       | 9981  | 850        | 208  | 35         | 2186  | 207        |
| Apr 4  | 13912 | 1537       | 11086 | 1105       | 231  | 23         | 2595  | 409        |
| Apr 5  | 15512 | 1600       | 12290 | 1204       | 280  | 49         | 2942  | 347        |
| Apr 6  | 16667 | 1155       | 12728 | 438        | 323  | 43         | 3616  | 674        |
| Apr 7  | 17897 | 1230       | 13488 | 760        | 381  | 58         | 4028  | 412        |
| Apr 8  | 19438 | 1541       | 14463 | 975        | 427  | 46         | 4548  | 520        |
| Apr 9  | 20765 | 1327       | 14945 | 482        | 509  | 82         | 5311  | 763        |
| Apr 10 | 22148 | 1383       | 15566 | 621        | 569  | 60         | 6013  | 702        |
| Apr 11 | 23318 | 1170       | 16237 | 671        | 653  | 84         | 6428  | 415        |
| Apr 12 | 24383 | 1065       | 16494 | 257        | 717  | 64         | 7172  | 744        |
| Apr 13 | 25680 | 1297       | 17144 | 650        | 780  | 63         | 7756  | 584        |
| Apr 14 | 27063 | 1383       | 17925 | 781        | 903  | 123        | 8235  | 479        |
| Apr 15 | 28379 | 1316       | 18390 | 465        | 1010 | 107        | 8979  | 744        |
| Apr 16 | 30106 | 1727       | 19182 | 792        | 1195 | 185        | 9729  | 750        |
| Apr 17 | 31927 | 1821       | 20074 | 892        | 1310 | 115        | 10543 | 814        |
| Apr 18 | 33383 | 1456       | 20706 | 632        | 1470 | 160        | 11207 | 664        |
| Apr 19 | 35056 | 1673       | 21626 | 920        | 1587 | 117        | 11843 | 636        |
| Apr 20 | 36829 | 1773       | 22553 | 927        | 1690 | 103        | 12586 | 743        |
| Apr 21 | 38422 | 1593       | 23400 | 847        | 1834 | 144        | 13188 | 602        |
| Apr 22 | 40190 | 1768       | 24230 | 830        | 1974 | 140        | 13986 | 798        |
| Apr 23 | 42110 | 1920       | 25202 | 972        | 2147 | 173        | 14761 | 775        |
| Apr 24 | 43888 | 1778       | 26117 | 915        | 2302 | 155        | 15469 | 708        |
| Apr 25 | 45354 | 1466       | 26464 | 347        | 2465 | 163        | 16425 | 956        |
| Apr 26 | 46895 | 1541       | 27014 | 550        | 2560 | 95         | 17321 | 896        |

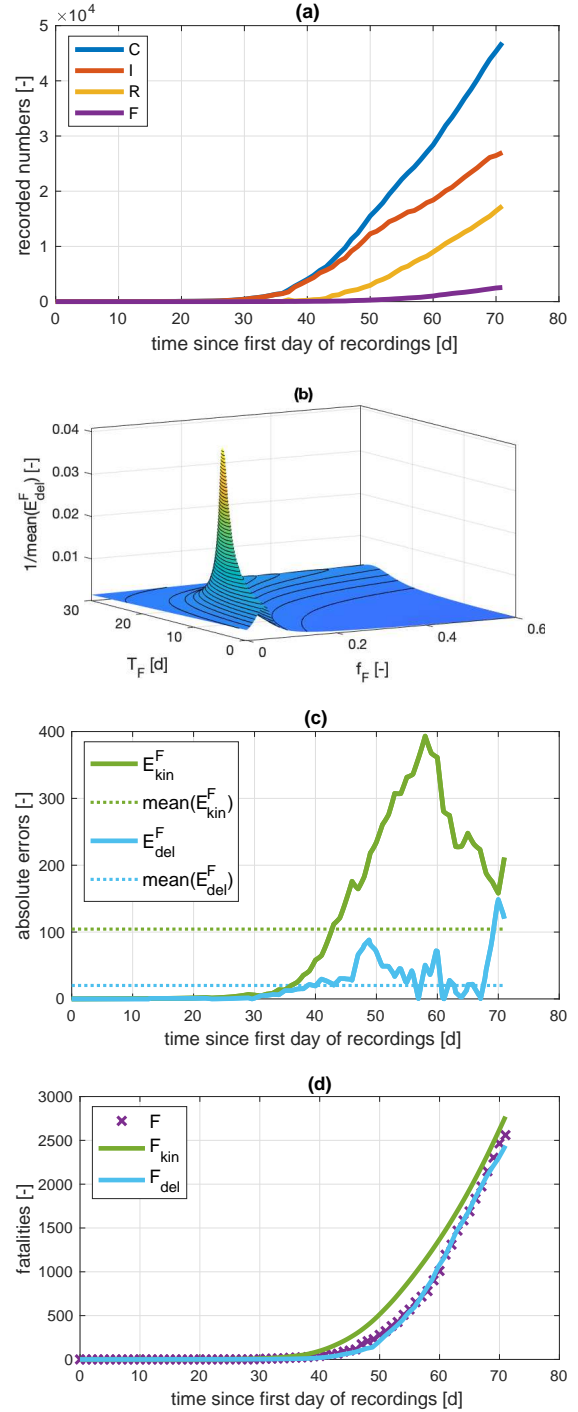

Figure 8: (a) Recorded data, (b) results of optimization based on infection-to-death delay rule, (c) absolute errors based on optimized parameter estimates, and (d) comparison between model-predicted fatalities based on optimized parameter estimates and recorded fatalities for Canada

Table 9: Data recorded in Chile

| Date   | C     | $\Delta C$ | I    | $\Delta I$ | F   | $\Delta F$ | R    | $\Delta R$ |
|--------|-------|------------|------|------------|-----|------------|------|------------|
| Mar 3  | 1     | 1          | 1    | 1          | 0   | 0          | 0    | 0          |
| Mar 4  | 3     | 2          | 3    | 2          | 0   | 0          | 0    | 0          |
| Mar 5  | 4     | 1          | 4    | 1          | 0   | 0          | 0    | 0          |
| Mar 6  | 5     | 1          | 5    | 1          | 0   | 0          | 0    | 0          |
| Mar 7  | 7     | 2          | 7    | 2          | 0   | 0          | 0    | 0          |
| Mar 8  | 10    | 3          | 10   | 3          | 0   | 0          | 0    | 0          |
| Mar 9  | 13    | 3          | 13   | 3          | 0   | 0          | 0    | 0          |
| Mar 10 | 17    | 4          | 17   | 4          | 0   | 0          | 0    | 0          |
| Mar 11 | 23    | 6          | 23   | 6          | 0   | 0          | 0    | 0          |
| Mar 12 | 33    | 10         | 33   | 10         | 0   | 0          | 0    | 0          |
| Mar 13 | 43    | 10         | 43   | 10         | 0   | 0          | 0    | 0          |
| Mar 14 | 61    | 18         | 61   | 18         | 0   | 0          | 0    | 0          |
| Mar 15 | 75    | 14         | 75   | 14         | 0   | 0          | 0    | 0          |
| Mar 16 | 156   | 81         | 156  | 81         | 0   | 0          | 0    | 0          |
| Mar 17 | 201   | 45         | 201  | 45         | 0   | 0          | 0    | 0          |
| Mar 18 | 238   | 37         | 238  | 37         | 0   | 0          | 0    | 0          |
| Mar 19 | 342   | 104        | 342  | 104        | 0   | 0          | 0    | 0          |
| Mar 20 | 434   | 92         | 428  | 86         | 0   | 0          | 6    | 6          |
| Mar 21 | 537   | 103        | 528  | 100        | 1   | 1          | 8    | 2          |
| Mar 22 | 632   | 95         | 623  | 95         | 1   | 0          | 8    | 0          |
| Mar 23 | 746   | 114        | 733  | 110        | 2   | 1          | 11   | 3          |
| Mar 24 | 922   | 176        | 903  | 170        | 2   | 0          | 17   | 6          |
| Mar 25 | 1142  | 220        | 1117 | 214        | 3   | 1          | 22   | 5          |
| Mar 26 | 1306  | 164        | 1280 | 163        | 4   | 1          | 22   | 0          |
| Mar 27 | 1610  | 304        | 1562 | 282        | 5   | 1          | 43   | 21         |
| Mar 28 | 1909  | 299        | 1842 | 280        | 6   | 1          | 61   | 18         |
| Mar 29 | 2139  | 230        | 2057 | 215        | 7   | 1          | 75   | 14         |
| Mar 30 | 2449  | 310        | 2285 | 228        | 8   | 1          | 156  | 81         |
| Mar 31 | 2738  | 289        | 2570 | 285        | 12  | 4          | 156  | 0          |
| Apr 1  | 3031  | 293        | 2781 | 211        | 16  | 4          | 234  | 78         |
| Apr 2  | 3404  | 373        | 3051 | 270        | 18  | 2          | 335  | 101        |
| Apr 3  | 3737  | 333        | 3288 | 237        | 22  | 4          | 427  | 92         |
| Apr 4  | 4161  | 424        | 3606 | 318        | 27  | 5          | 528  | 101        |
| Apr 5  | 4471  | 310        | 3819 | 213        | 34  | 7          | 618  | 90         |
| Apr 6  | 4815  | 344        | 4050 | 231        | 37  | 3          | 728  | 110        |
| Apr 7  | 5116  | 301        | 4175 | 125        | 43  | 6          | 898  | 170        |
| Apr 8  | 5546  | 430        | 4383 | 208        | 48  | 5          | 1115 | 217        |
| Apr 9  | 5972  | 426        | 4641 | 258        | 57  | 9          | 1274 | 159        |
| Apr 10 | 6501  | 529        | 4865 | 224        | 65  | 8          | 1571 | 297        |
| Apr 11 | 6927  | 426        | 4990 | 125        | 73  | 8          | 1864 | 293        |
| Apr 12 | 7213  | 286        | 5074 | 84         | 80  | 7          | 2059 | 195        |
| Apr 13 | 7525  | 312        | 5076 | 2          | 82  | 2          | 2367 | 308        |
| Apr 14 | 7917  | 392        | 5179 | 103        | 92  | 10         | 2646 | 279        |
| Apr 15 | 8273  | 356        | 5242 | 63         | 94  | 2          | 2937 | 291        |
| Apr 16 | 8807  | 534        | 5403 | 161        | 105 | 11         | 3299 | 362        |
| Apr 17 | 9252  | 445        | 5515 | 112        | 116 | 11         | 3621 | 322        |
| Apr 18 | 9730  | 478        | 5569 | 54         | 126 | 10         | 4035 | 414        |
| Apr 19 | 10088 | 358        | 5617 | 48         | 133 | 7          | 4338 | 303        |
| Apr 20 | 10507 | 419        | 5692 | 75         | 139 | 6          | 4676 | 338        |
| Apr 21 | 10832 | 325        | 5716 | 24         | 147 | 8          | 4969 | 293        |
| Apr 22 | 11296 | 464        | 5750 | 34         | 160 | 13         | 5386 | 417        |
| Apr 23 | 11812 | 516        | 5840 | 90         | 168 | 8          | 5804 | 418        |
| Apr 24 | 12306 | 494        | 5805 | -35        | 174 | 6          | 6327 | 523        |
| Apr 25 | 12858 | 552        | 5931 | 126        | 181 | 7          | 6746 | 419        |
| Apr 26 | 13331 | 473        | 6118 | 187        | 189 | 8          | 7024 | 278        |

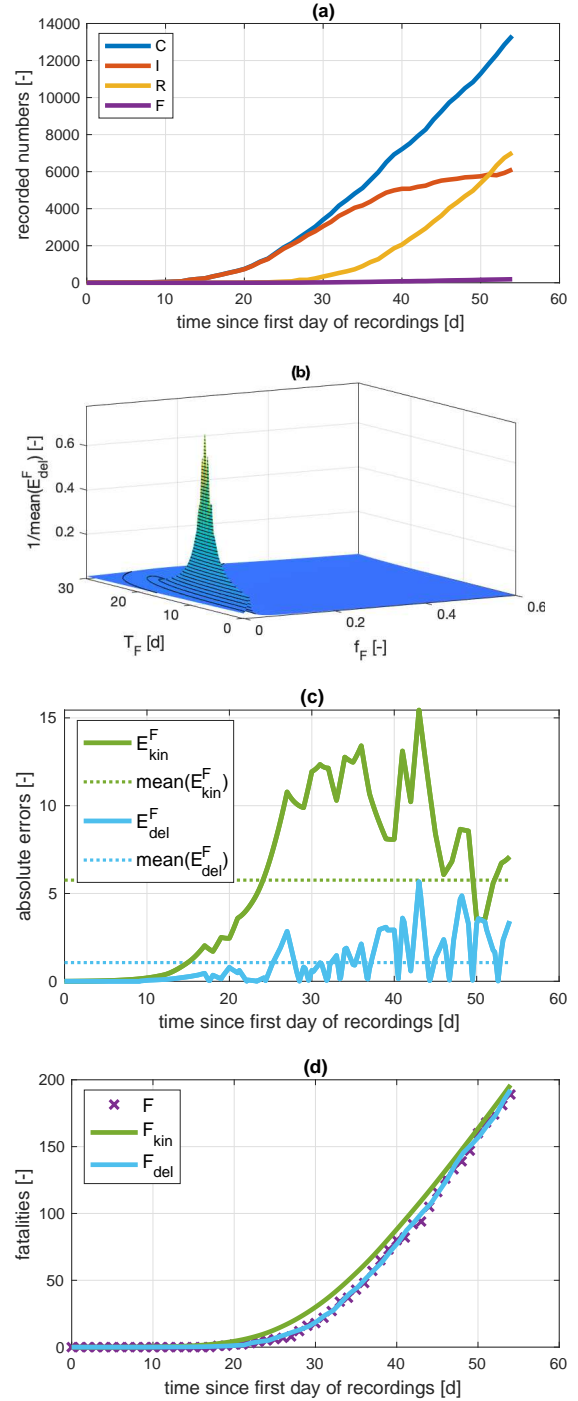

Figure 9: (a) Recorded data, (b) results of optimization based on infection-to-death delay rule, (c) absolute errors based on optimized parameter estimates, and (d) comparison between model-predicted fatalities based on optimized parameter estimates and recorded fatalities for Chile

Table 10: Data recorded in China

| Date   | C     | $\Delta C$ | I     | $\Delta I$ | F    | $\Delta F$ | R     | $\Delta R$ |
|--------|-------|------------|-------|------------|------|------------|-------|------------|
| Jan 22 | 571   | 571        | 554   | 554        | 17   | 17         | 0     | 0          |
| Jan 23 | 830   | 259        | 771   | 217        | 25   | 8          | 34    | 34         |
| Jan 24 | 1287  | 457        | 1208  | 437        | 41   | 16         | 38    | 4          |
| Jan 25 | 1975  | 688        | 1870  | 662        | 56   | 15         | 49    | 11         |
| Jan 26 | 2744  | 769        | 2613  | 743        | 80   | 24         | 51    | 2          |
| Jan 27 | 4515  | 1771       | 4349  | 1736       | 106  | 26         | 60    | 9          |
| Jan 28 | 5974  | 1459       | 5739  | 1390       | 132  | 26         | 103   | 43         |
| Jan 29 | 7711  | 1737       | 7417  | 1678       | 170  | 38         | 124   | 21         |
| Jan 30 | 9692  | 1981       | 9308  | 1891       | 213  | 43         | 171   | 47         |
| Jan 31 | 11791 | 2099       | 11289 | 1981       | 259  | 46         | 243   | 72         |
| Feb 1  | 14380 | 2589       | 13748 | 2459       | 304  | 45         | 328   | 85         |
| Feb 2  | 17205 | 2825       | 16369 | 2621       | 361  | 57         | 475   | 147        |
| Feb 3  | 20440 | 3235       | 19383 | 3014       | 425  | 64         | 632   | 157        |
| Feb 4  | 24324 | 3884       | 22942 | 3559       | 490  | 65         | 892   | 260        |
| Feb 5  | 28018 | 3694       | 26302 | 3360       | 563  | 73         | 1153  | 261        |
| Feb 6  | 31161 | 3143       | 28985 | 2683       | 636  | 73         | 1540  | 387        |
| Feb 7  | 34546 | 3385       | 31774 | 2789       | 722  | 86         | 2050  | 510        |
| Feb 8  | 37198 | 2652       | 33738 | 1964       | 811  | 89         | 2649  | 599        |
| Feb 9  | 40171 | 2973       | 35982 | 2244       | 908  | 97         | 3281  | 632        |
| Feb 10 | 42638 | 2467       | 37626 | 1644       | 1016 | 108        | 3996  | 715        |
| Feb 11 | 44653 | 2015       | 38791 | 1165       | 1113 | 97         | 4749  | 753        |
| Feb 12 | 58761 | 14108      | 51591 | 12800      | 1259 | 146        | 5911  | 1162       |
| Feb 13 | 63851 | 5090       | 55748 | 4157       | 1380 | 121        | 6723  | 812        |
| Feb 14 | 66492 | 2641       | 56873 | 1125       | 1523 | 143        | 8096  | 1373       |
| Feb 15 | 68500 | 2008       | 57416 | 543        | 1665 | 142        | 9419  | 1323       |
| Feb 16 | 70548 | 2048       | 57934 | 518        | 1770 | 105        | 10844 | 1425       |
| Feb 17 | 72436 | 1888       | 58016 | 82         | 1868 | 98         | 12552 | 1708       |
| Feb 18 | 74185 | 1749       | 57805 | -211       | 2004 | 136        | 14376 | 1824       |
| Feb 19 | 74576 | 391        | 56301 | -1504      | 2118 | 114        | 16157 | 1781       |
| Feb 20 | 75465 | 889        | 54921 | -1380      | 2236 | 118        | 18308 | 2151       |
| Feb 21 | 76288 | 823        | 53284 | -1637      | 2345 | 109        | 20659 | 2351       |
| Feb 22 | 76936 | 648        | 52093 | -1191      | 2442 | 97         | 22401 | 1742       |
| Feb 23 | 77150 | 214        | 49824 | -2269      | 2592 | 150        | 24734 | 2333       |
| Feb 24 | 77658 | 508        | 47765 | -2059      | 2663 | 71         | 27230 | 2496       |
| Feb 25 | 78064 | 406        | 45600 | -2165      | 2715 | 52         | 29749 | 2519       |
| Feb 26 | 78497 | 433        | 43258 | -2342      | 2744 | 29         | 32495 | 2746       |
| Feb 27 | 78824 | 327        | 39919 | -3339      | 2788 | 44         | 36117 | 3622       |
| Feb 28 | 79251 | 427        | 37414 | -2505      | 2835 | 47         | 39002 | 2885       |
| Feb 29 | 79824 | 573        | 35129 | -2285      | 2870 | 35         | 41825 | 2823       |
| Mar 1  | 80026 | 202        | 32616 | -2513      | 2912 | 42         | 44498 | 2673       |
| Mar 2  | 80151 | 125        | 30004 | -2612      | 2943 | 31         | 47204 | 2706       |
| Mar 3  | 80270 | 119        | 27423 | -2581      | 2981 | 38         | 49866 | 2662       |
| Mar 4  | 80409 | 139        | 25353 | -2070      | 3012 | 31         | 52044 | 2178       |
| Mar 5  | 80552 | 143        | 23784 | -1569      | 3042 | 30         | 53726 | 1682       |
| Mar 6  | 80651 | 99         | 22179 | -1605      | 3070 | 28         | 55402 | 1676       |
| Mar 7  | 80695 | 44         | 20533 | -1646      | 3097 | 27         | 57065 | 1663       |
| Mar 8  | 80735 | 40         | 19016 | -1517      | 3119 | 22         | 58600 | 1535       |
| Mar 9  | 80754 | 19         | 17721 | -1295      | 3136 | 17         | 59897 | 1297       |
| Mar 10 | 80778 | 24         | 16136 | -1585      | 3158 | 22         | 61484 | 1587       |
| Mar 11 | 80793 | 15         | 14831 | -1305      | 3169 | 11         | 62793 | 1309       |
| Mar 12 | 80813 | 20         | 13524 | -1307      | 3176 | 7          | 64113 | 1320       |
| Mar 13 | 80824 | 11         | 12088 | -1436      | 3189 | 13         | 65547 | 1434       |
| Mar 14 | 80844 | 20         | 10733 | -1355      | 3199 | 10         | 66912 | 1365       |
| Mar 15 | 80860 | 16         | 9893  | -840       | 3213 | 14         | 67754 | 842        |
| Mar 16 | 80881 | 21         | 8967  | -926       | 3226 | 13         | 68688 | 934        |
| Mar 17 | 80894 | 13         | 8056  | -911       | 3237 | 11         | 69601 | 913        |
| Mar 18 | 80928 | 34         | 7263  | -793       | 3245 | 8          | 70420 | 819        |
| Mar 19 | 80967 | 39         | 6569  | -694       | 3248 | 3          | 71150 | 730        |
| Mar 20 | 81008 | 41         | 6013  | -556       | 3255 | 7          | 71740 | 590        |
| Mar 21 | 81054 | 46         | 5353  | -660       | 3261 | 6          | 72440 | 700        |
| Mar 22 | 81093 | 39         | 5120  | -233       | 3270 | 9          | 72703 | 263        |
| Mar 23 | 81171 | 78         | 4735  | -385       | 3277 | 7          | 73159 | 456        |
| Mar 24 | 81218 | 47         | 4287  | -448       | 3281 | 4          | 73650 | 491        |
| Mar 25 | 81285 | 67         | 3947  | -340       | 3287 | 6          | 74051 | 401        |
| Mar 26 | 81340 | 55         | 3460  | -487       | 3292 | 5          | 74588 | 537        |
| Mar 27 | 81394 | 54         | 3128  | -332       | 3295 | 3          | 74971 | 383        |
| Mar 28 | 81439 | 45         | 2691  | -437       | 3300 | 5          | 75448 | 477        |
| Mar 29 | 81439 | 0          | 2691  | 0          | 3300 | 0          | 75448 | 0          |
| Mar 30 | 81518 | 79         | 2161  | -530       | 3305 | 5          | 76052 | 604        |
| Mar 31 | 81554 | 36         | 2004  | -157       | 3312 | 7          | 76238 | 186        |
| Apr 1  | 81589 | 35         | 1863  | -141       | 3318 | 6          | 76408 | 170        |
| Apr 2  | 81620 | 31         | 1727  | -136       | 3322 | 4          | 76571 | 163        |
| Apr 3  | 81639 | 19         | 1558  | -169       | 3326 | 4          | 76755 | 184        |
| Apr 4  | 81669 | 30         | 1376  | -182       | 3329 | 3          | 76964 | 209        |
| Apr 5  | 81708 | 39         | 1299  | -77        | 3331 | 2          | 77078 | 114        |
| Apr 6  | 81740 | 32         | 1242  | -57        | 3331 | 0          | 77167 | 89         |
| Apr 7  | 81802 | 62         | 1190  | -52        | 3333 | 2          | 77279 | 112        |
| Apr 8  | 81865 | 63         | 1160  | -30        | 3335 | 2          | 77370 | 91         |
| Apr 9  | 81907 | 42         | 1116  | -44        | 3336 | 1          | 77455 | 85         |
| Apr 10 | 81953 | 46         | 1089  | -27        | 3339 | 3          | 77525 | 70         |
| Apr 11 | 82052 | 99         | 1138  | 49         | 3339 | 0          | 77575 | 50         |
| Apr 12 | 82160 | 108        | 1156  | 18         | 3341 | 2          | 77663 | 88         |
| Apr 13 | 82249 | 89         | 1170  | 14         | 3341 | 0          | 77738 | 75         |
| Apr 14 | 82295 | 46         | 1137  | -33        | 3342 | 1          | 77816 | 78         |
| Apr 15 | 82341 | 46         | 1107  | -30        | 3342 | 0          | 77892 | 76         |
| Apr 16 | 82367 | 26         | 1081  | -26        | 3342 | 0          | 77944 | 52         |
| Apr 17 | 82692 | 325        | 66    | -1015      | 4632 | 1290       | 77994 | 50         |
| Apr 18 | 82719 | 27         | 1058  | 992        | 4632 | 0          | 77029 | -965       |
| Apr 19 | 82735 | 16         | 1041  | -17        | 4632 | 0          | 77062 | 33         |
| Apr 20 | 82747 | 12         | 1031  | -10        | 4632 | 0          | 77084 | 22         |
| Apr 21 | 82758 | 11         | 1003  | -28        | 4632 | 0          | 77123 | 39         |
| Apr 22 | 82788 | 30         | 1005  | 2          | 4632 | 0          | 77151 | 28         |
| Apr 23 | 82798 | 10         | 959   | -46        | 4632 | 0          | 77207 | 56         |
| Apr 24 | 82804 | 6          | 915   | -44        | 4632 | 0          | 77257 | 50         |
| Apr 25 | 82816 | 12         | 838   | -77        | 4632 | 0          | 77346 | 89         |
| Apr 26 | 82827 | 11         | 801   | -37        | 4632 | 0          | 77394 | 48         |

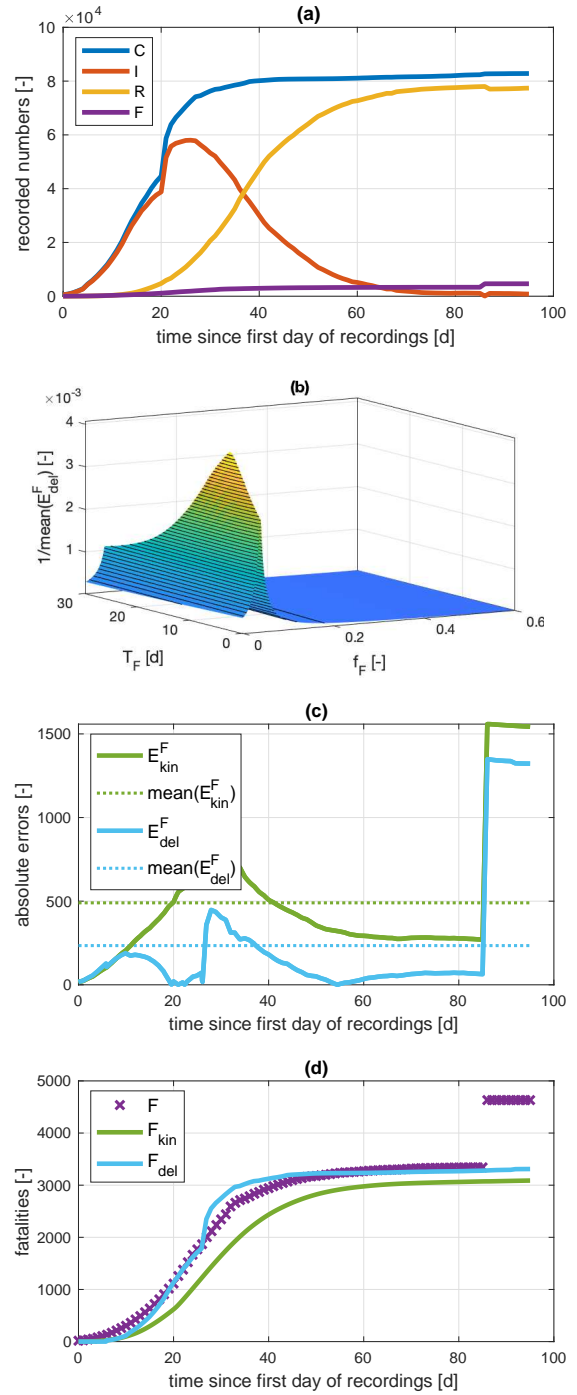

Figure 10: (a) Recorded data, (b) results of optimization based on infection-to-death delay rule, (c) absolute errors based on optimized parameter estimates, and (d) comparison between model-predicted fatalities based on optimized parameter estimates and recorded fatalities for China

Table 11: Data recorded in Colombia

| Date   | C    | $\Delta C$ | I    | $\Delta I$ | F   | $\Delta F$ | R    | $\Delta R$ |
|--------|------|------------|------|------------|-----|------------|------|------------|
| Mar 6  | 1    | 1          | 1    | 1          | 0   | 0          | 0    | 0          |
| Mar 7  | 1    | 0          | 1    | 0          | 0   | 0          | 0    | 0          |
| Mar 8  | 1    | 0          | 1    | 0          | 0   | 0          | 0    | 0          |
| Mar 9  | 3    | 2          | 3    | 2          | 0   | 0          | 0    | 0          |
| Mar 10 | 3    | 0          | 3    | 0          | 0   | 0          | 0    | 0          |
| Mar 11 | 9    | 6          | 9    | 6          | 0   | 0          | 0    | 0          |
| Mar 12 | 9    | 0          | 9    | 0          | 0   | 0          | 0    | 0          |
| Mar 13 | 16   | 7          | 16   | 7          | 0   | 0          | 0    | 0          |
| Mar 14 | 24   | 8          | 24   | 8          | 0   | 0          | 0    | 0          |
| Mar 15 | 34   | 10         | 34   | 10         | 0   | 0          | 0    | 0          |
| Mar 16 | 54   | 20         | 53   | 19         | 0   | 0          | 1    | 1          |
| Mar 17 | 65   | 11         | 64   | 11         | 0   | 0          | 1    | 0          |
| Mar 18 | 93   | 28         | 92   | 28         | 0   | 0          | 1    | 0          |
| Mar 19 | 108  | 15         | 107  | 15         | 0   | 0          | 1    | 0          |
| Mar 20 | 145  | 37         | 144  | 37         | 0   | 0          | 1    | 0          |
| Mar 21 | 196  | 51         | 195  | 51         | 0   | 0          | 1    | 0          |
| Mar 22 | 231  | 35         | 226  | 31         | 2   | 2          | 3    | 2          |
| Mar 23 | 277  | 46         | 271  | 45         | 3   | 1          | 3    | 0          |
| Mar 24 | 378  | 101        | 369  | 98         | 3   | 0          | 6    | 3          |
| Mar 25 | 470  | 92         | 458  | 89         | 4   | 1          | 8    | 2          |
| Mar 26 | 491  | 21         | 477  | 19         | 6   | 2          | 8    | 0          |
| Mar 27 | 539  | 48         | 523  | 46         | 6   | 0          | 10   | 2          |
| Mar 28 | 608  | 69         | 592  | 69         | 6   | 0          | 10   | 0          |
| Mar 29 | 702  | 94         | 682  | 90         | 10  | 4          | 10   | 0          |
| Mar 30 | 798  | 96         | 769  | 87         | 14  | 4          | 15   | 5          |
| Mar 31 | 906  | 108        | 859  | 90         | 16  | 2          | 31   | 16         |
| Apr 1  | 1065 | 159        | 1009 | 150        | 17  | 1          | 39   | 8          |
| Apr 2  | 1161 | 96         | 1087 | 78         | 19  | 2          | 55   | 16         |
| Apr 3  | 1267 | 106        | 1187 | 100        | 25  | 6          | 55   | 0          |
| Apr 4  | 1406 | 139        | 1289 | 102        | 32  | 7          | 85   | 30         |
| Apr 5  | 1485 | 79         | 1362 | 73         | 35  | 3          | 88   | 3          |
| Apr 6  | 1579 | 94         | 1445 | 83         | 46  | 11         | 88   | 0          |
| Apr 7  | 1780 | 201        | 1630 | 185        | 50  | 4          | 100  | 12         |
| Apr 8  | 2054 | 274        | 1876 | 246        | 55  | 5          | 123  | 23         |
| Apr 9  | 2223 | 169        | 1980 | 104        | 69  | 14         | 174  | 51         |
| Apr 10 | 2473 | 250        | 2196 | 216        | 80  | 11         | 197  | 23         |
| Apr 11 | 2709 | 236        | 2395 | 199        | 100 | 20         | 214  | 17         |
| Apr 12 | 2776 | 67         | 2397 | 2          | 109 | 9          | 270  | 56         |
| Apr 13 | 2852 | 76         | 2421 | 24         | 112 | 3          | 319  | 49         |
| Apr 14 | 2979 | 127        | 2498 | 77         | 127 | 15         | 354  | 35         |
| Apr 15 | 3105 | 126        | 2522 | 24         | 131 | 4          | 452  | 98         |
| Apr 16 | 3233 | 128        | 2539 | 17         | 144 | 13         | 550  | 98         |
| Apr 17 | 3439 | 206        | 2652 | 113        | 153 | 9          | 634  | 84         |
| Apr 18 | 3621 | 182        | 2764 | 112        | 166 | 13         | 691  | 57         |
| Apr 19 | 3792 | 171        | 2902 | 138        | 179 | 13         | 711  | 20         |
| Apr 20 | 3977 | 185        | 2984 | 82         | 189 | 10         | 804  | 93         |
| Apr 21 | 4149 | 172        | 3149 | 165        | 196 | 7          | 804  | 0          |
| Apr 22 | 4356 | 207        | 3280 | 131        | 206 | 10         | 870  | 66         |
| Apr 23 | 4561 | 205        | 3419 | 139        | 215 | 9          | 927  | 57         |
| Apr 24 | 4881 | 320        | 3653 | 234        | 225 | 10         | 1003 | 76         |
| Apr 25 | 5142 | 261        | 3842 | 189        | 233 | 8          | 1067 | 64         |
| Apr 26 | 5379 | 237        | 4002 | 160        | 244 | 11         | 1133 | 66         |

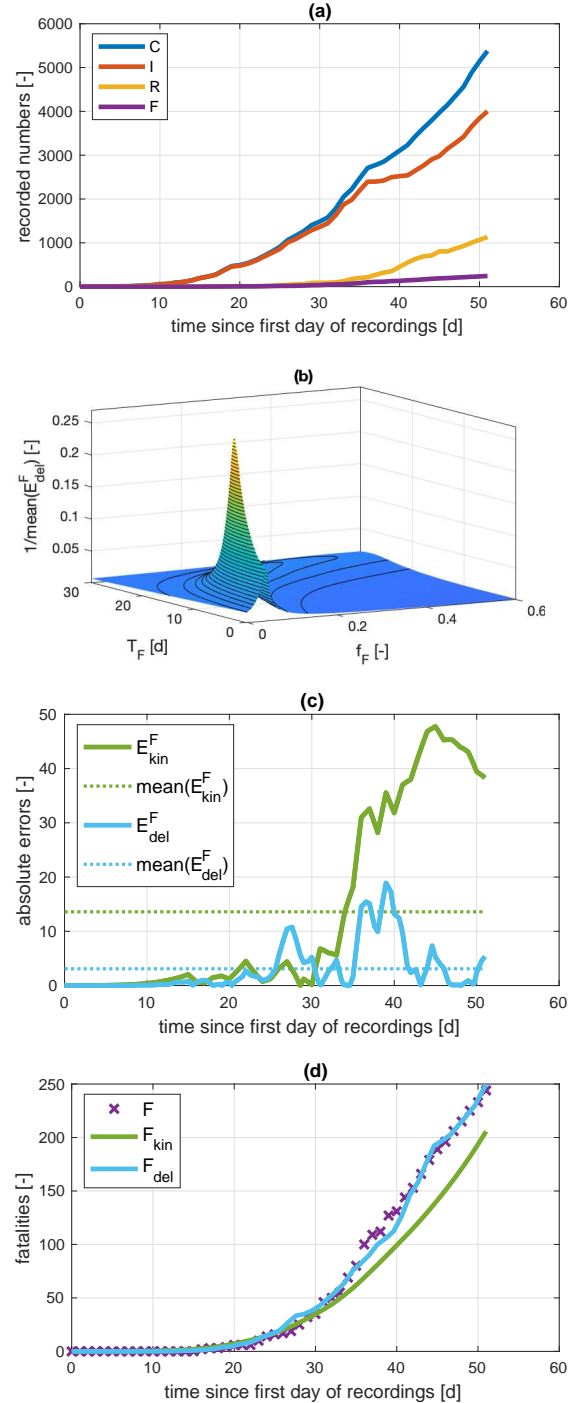

Figure 11: (a) Recorded data, (b) results of optimization based on infection-to-death delay rule, (c) absolute errors based on optimized parameter estimates, and (d) comparison between model-predicted fatalities based on optimized parameter estimates and recorded fatalities for Colombia

Table 12: Data recorded in Croatia

| Date   | $C$  | $\Delta C$ | $I$  | $\Delta I$ | $F$ | $\Delta F$ | $R$  | $\Delta R$ |
|--------|------|------------|------|------------|-----|------------|------|------------|
| Feb 25 | 1    | 1          | 1    | 1          | 0   | 0          | 0    | 0          |
| Feb 26 | 3    | 2          | 3    | 2          | 0   | 0          | 0    | 0          |
| Feb 27 | 3    | 0          | 3    | 0          | 0   | 0          | 0    | 0          |
| Feb 28 | 5    | 2          | 5    | 2          | 0   | 0          | 0    | 0          |
| Feb 29 | 6    | 1          | 6    | 1          | 0   | 0          | 0    | 0          |
| Mar 1  | 7    | 1          | 7    | 1          | 0   | 0          | 0    | 0          |
| Mar 2  | 8    | 1          | 8    | 1          | 0   | 0          | 0    | 0          |
| Mar 3  | 9    | 1          | 9    | 1          | 0   | 0          | 0    | 0          |
| Mar 4  | 10   | 1          | 10   | 1          | 0   | 0          | 0    | 0          |
| Mar 5  | 10   | 0          | 10   | 0          | 0   | 0          | 0    | 0          |
| Mar 6  | 11   | 1          | 11   | 1          | 0   | 0          | 0    | 0          |
| Mar 7  | 12   | 1          | 12   | 1          | 0   | 0          | 0    | 0          |
| Mar 8  | 12   | 0          | 12   | 0          | 0   | 0          | 0    | 0          |
| Mar 9  | 13   | 1          | 13   | 1          | 0   | 0          | 0    | 0          |
| Mar 10 | 15   | 2          | 15   | 2          | 0   | 0          | 0    | 0          |
| Mar 11 | 19   | 4          | 19   | 4          | 0   | 0          | 0    | 0          |
| Mar 12 | 27   | 8          | 26   | 7          | 0   | 0          | 1    | 1          |
| Mar 13 | 32   | 5          | 31   | 5          | 0   | 0          | 1    | 0          |
| Mar 14 | 39   | 7          | 37   | 6          | 0   | 0          | 2    | 1          |
| Mar 15 | 49   | 10         | 47   | 10         | 0   | 0          | 2    | 0          |
| Mar 16 | 57   | 8          | 54   | 7          | 0   | 0          | 3    | 1          |
| Mar 17 | 69   | 12         | 64   | 10         | 0   | 0          | 5    | 2          |
| Mar 18 | 89   | 20         | 84   | 20         | 0   | 0          | 5    | 0          |
| Mar 19 | 110  | 21         | 104  | 20         | 1   | 1          | 5    | 0          |
| Mar 20 | 130  | 20         | 124  | 20         | 1   | 0          | 5    | 0          |
| Mar 21 | 206  | 76         | 200  | 76         | 1   | 0          | 5    | 0          |
| Mar 22 | 254  | 48         | 248  | 48         | 1   | 0          | 5    | 0          |
| Mar 23 | 315  | 61         | 309  | 61         | 1   | 0          | 5    | 0          |
| Mar 24 | 382  | 67         | 376  | 67         | 1   | 0          | 5    | 0          |
| Mar 25 | 442  | 60         | 419  | 43         | 1   | 0          | 22   | 17         |
| Mar 26 | 495  | 53         | 470  | 51         | 3   | 2          | 22   | 0          |
| Mar 27 | 586  | 91         | 546  | 76         | 3   | 0          | 37   | 15         |
| Mar 28 | 657  | 71         | 607  | 61         | 5   | 2          | 45   | 8          |
| Mar 29 | 713  | 56         | 652  | 45         | 6   | 1          | 55   | 10         |
| Mar 30 | 790  | 77         | 717  | 65         | 6   | 0          | 67   | 12         |
| Mar 31 | 867  | 77         | 794  | 77         | 6   | 0          | 67   | 0          |
| Apr 1  | 963  | 96         | 884  | 90         | 6   | 0          | 73   | 6          |
| Apr 2  | 1011 | 48         | 916  | 32         | 7   | 1          | 88   | 15         |
| Apr 3  | 1079 | 68         | 979  | 63         | 8   | 1          | 92   | 4          |
| Apr 4  | 1126 | 47         | 995  | 16         | 12  | 4          | 119  | 27         |
| Apr 5  | 1182 | 56         | 1042 | 47         | 15  | 3          | 125  | 6          |
| Apr 6  | 1222 | 40         | 1076 | 34         | 16  | 1          | 130  | 5          |
| Apr 7  | 1282 | 60         | 1097 | 21         | 18  | 2          | 167  | 37         |
| Apr 8  | 1343 | 61         | 1145 | 48         | 19  | 1          | 179  | 12         |
| Apr 9  | 1407 | 64         | 1168 | 23         | 20  | 1          | 219  | 40         |
| Apr 10 | 1495 | 88         | 1243 | 75         | 21  | 1          | 231  | 12         |
| Apr 11 | 1534 | 39         | 1190 | -53        | 21  | 0          | 323  | 92         |
| Apr 12 | 1600 | 66         | 1204 | 14         | 23  | 2          | 373  | 50         |
| Apr 13 | 1650 | 50         | 1225 | 21         | 25  | 2          | 400  | 27         |
| Apr 14 | 1704 | 54         | 1258 | 33         | 31  | 6          | 415  | 15         |
| Apr 15 | 1741 | 37         | 1235 | -23        | 33  | 2          | 473  | 58         |
| Apr 16 | 1791 | 50         | 1227 | -8         | 35  | 2          | 529  | 56         |
| Apr 17 | 1814 | 23         | 1178 | -49        | 36  | 1          | 600  | 71         |
| Apr 18 | 1832 | 18         | 1178 | 0          | 39  | 3          | 615  | 15         |
| Apr 19 | 1871 | 39         | 1115 | -63        | 47  | 8          | 709  | 94         |
| Apr 20 | 1881 | 10         | 1063 | -52        | 47  | 0          | 771  | 62         |
| Apr 21 | 1908 | 27         | 1059 | -4         | 48  | 1          | 801  | 30         |
| Apr 22 | 1950 | 42         | 1033 | -26        | 48  | 0          | 869  | 68         |
| Apr 23 | 1981 | 31         | 1048 | 15         | 50  | 2          | 883  | 14         |
| Apr 24 | 2009 | 28         | 976  | -72        | 51  | 1          | 982  | 99         |
| Apr 25 | 2016 | 7          | 928  | -48        | 54  | 3          | 1034 | 52         |
| Apr 26 | 2030 | 14         | 872  | -56        | 55  | 1          | 1103 | 69         |

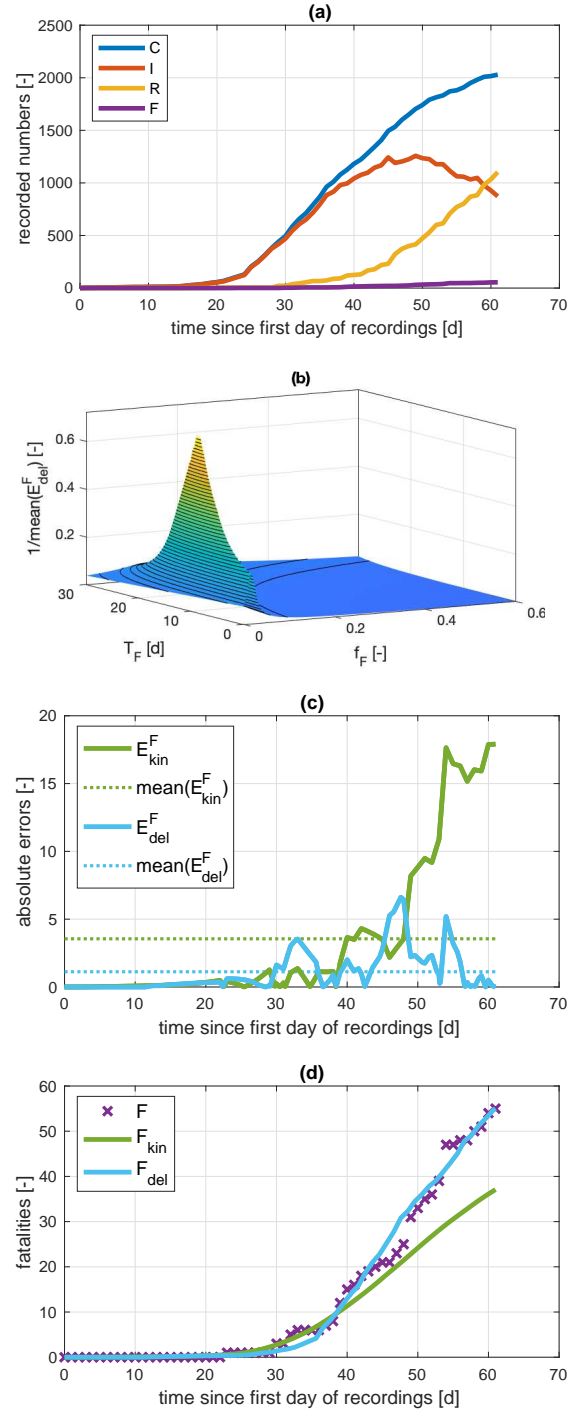

Figure 12: (a) Recorded data, (b) results of optimization based on infection-to-death delay rule, (c) absolute errors based on optimized parameter estimates, and (d) comparison between model-predicted fatalities based on optimized parameter estimates and recorded fatalities for Croatia

Table 13: Data recorded in Czech Republic

| Date   | $C$  | $\Delta C$ | $I$  | $\Delta I$ | $F$ | $\Delta F$ | $R$  | $\Delta R$ |
|--------|------|------------|------|------------|-----|------------|------|------------|
| Mar 1  | 3    | 3          | 3    | 3          | 0   | 0          | 0    | 0          |
| Mar 2  | 4    | 1          | 4    | 1          | 0   | 0          | 0    | 0          |
| Mar 3  | 5    | 1          | 5    | 1          | 0   | 0          | 0    | 0          |
| Mar 4  | 8    | 3          | 8    | 3          | 0   | 0          | 0    | 0          |
| Mar 5  | 12   | 4          | 12   | 4          | 0   | 0          | 0    | 0          |
| Mar 6  | 19   | 7          | 19   | 7          | 0   | 0          | 0    | 0          |
| Mar 7  | 26   | 7          | 26   | 7          | 0   | 0          | 0    | 0          |
| Mar 8  | 32   | 6          | 32   | 6          | 0   | 0          | 0    | 0          |
| Mar 9  | 38   | 6          | 38   | 6          | 0   | 0          | 0    | 0          |
| Mar 10 | 63   | 25         | 63   | 25         | 0   | 0          | 0    | 0          |
| Mar 11 | 94   | 31         | 94   | 31         | 0   | 0          | 0    | 0          |
| Mar 12 | 116  | 22         | 116  | 22         | 0   | 0          | 0    | 0          |
| Mar 13 | 141  | 25         | 141  | 25         | 0   | 0          | 0    | 0          |
| Mar 14 | 189  | 48         | 189  | 48         | 0   | 0          | 0    | 0          |
| Mar 15 | 293  | 104        | 293  | 104        | 0   | 0          | 0    | 0          |
| Mar 16 | 344  | 51         | 341  | 48         | 0   | 0          | 3    | 3          |
| Mar 17 | 434  | 90         | 431  | 90         | 0   | 0          | 3    | 0          |
| Mar 18 | 522  | 88         | 519  | 88         | 0   | 0          | 3    | 0          |
| Mar 19 | 694  | 172        | 691  | 172        | 0   | 0          | 3    | 0          |
| Mar 20 | 833  | 139        | 829  | 138        | 0   | 0          | 4    | 1          |
| Mar 21 | 995  | 162        | 989  | 160        | 0   | 0          | 6    | 2          |
| Mar 22 | 1120 | 125        | 1113 | 124        | 1   | 1          | 6    | 0          |
| Mar 23 | 1236 | 116        | 1228 | 115        | 1   | 0          | 7    | 1          |
| Mar 24 | 1394 | 158        | 1381 | 153        | 3   | 2          | 10   | 3          |
| Mar 25 | 1654 | 260        | 1638 | 257        | 6   | 3          | 10   | 0          |
| Mar 26 | 1925 | 271        | 1906 | 268        | 9   | 3          | 10   | 0          |
| Mar 27 | 2279 | 354        | 2259 | 353        | 9   | 0          | 11   | 1          |
| Mar 28 | 2631 | 352        | 2609 | 350        | 11  | 2          | 11   | 0          |
| Mar 29 | 2817 | 186        | 2790 | 181        | 16  | 5          | 11   | 0          |
| Mar 30 | 3001 | 184        | 2953 | 163        | 23  | 7          | 25   | 14         |
| Mar 31 | 3308 | 307        | 3232 | 279        | 31  | 8          | 45   | 20         |
| Apr 1  | 3589 | 281        | 3489 | 257        | 39  | 8          | 61   | 16         |
| Apr 2  | 3858 | 269        | 3747 | 258        | 44  | 5          | 67   | 6          |
| Apr 3  | 4190 | 332        | 4065 | 318        | 53  | 9          | 72   | 5          |
| Apr 4  | 4472 | 282        | 4335 | 270        | 59  | 6          | 78   | 6          |
| Apr 5  | 4587 | 115        | 4424 | 89         | 67  | 8          | 96   | 18         |
| Apr 6  | 4822 | 235        | 4623 | 199        | 78  | 11         | 121  | 25         |
| Apr 7  | 5017 | 195        | 4757 | 134        | 88  | 10         | 172  | 51         |
| Apr 8  | 5312 | 295        | 4980 | 223        | 99  | 11         | 233  | 61         |
| Apr 9  | 5569 | 257        | 5156 | 176        | 112 | 13         | 301  | 68         |
| Apr 10 | 5732 | 163        | 5267 | 111        | 119 | 7          | 346  | 45         |
| Apr 11 | 5902 | 170        | 5362 | 95         | 129 | 10         | 411  | 65         |
| Apr 12 | 5991 | 89         | 5389 | 27         | 138 | 9          | 464  | 53         |
| Apr 13 | 6059 | 68         | 5397 | 8          | 143 | 5          | 519  | 55         |
| Apr 14 | 6111 | 52         | 5308 | -89        | 161 | 18         | 642  | 123        |
| Apr 15 | 6301 | 190        | 5316 | 8          | 166 | 5          | 819  | 177        |
| Apr 16 | 6433 | 132        | 5292 | -24        | 169 | 3          | 972  | 153        |
| Apr 17 | 6549 | 116        | 5202 | -90        | 173 | 4          | 1174 | 202        |
| Apr 18 | 6606 | 57         | 5198 | -4         | 181 | 8          | 1227 | 53         |
| Apr 19 | 6746 | 140        | 5262 | 64         | 186 | 5          | 1298 | 71         |
| Apr 20 | 6900 | 154        | 5147 | -115       | 194 | 8          | 1559 | 261        |
| Apr 21 | 7033 | 133        | 5079 | -68        | 201 | 7          | 1753 | 194        |
| Apr 22 | 7132 | 99         | 4935 | -144       | 208 | 7          | 1989 | 236        |
| Apr 23 | 7187 | 55         | 4825 | -110       | 210 | 2          | 2152 | 163        |
| Apr 24 | 7273 | 86         | 4688 | -137       | 214 | 4          | 2371 | 219        |
| Apr 25 | 7352 | 79         | 4681 | -7         | 218 | 4          | 2453 | 82         |
| Apr 26 | 7404 | 52         | 4639 | -42        | 220 | 2          | 2545 | 92         |

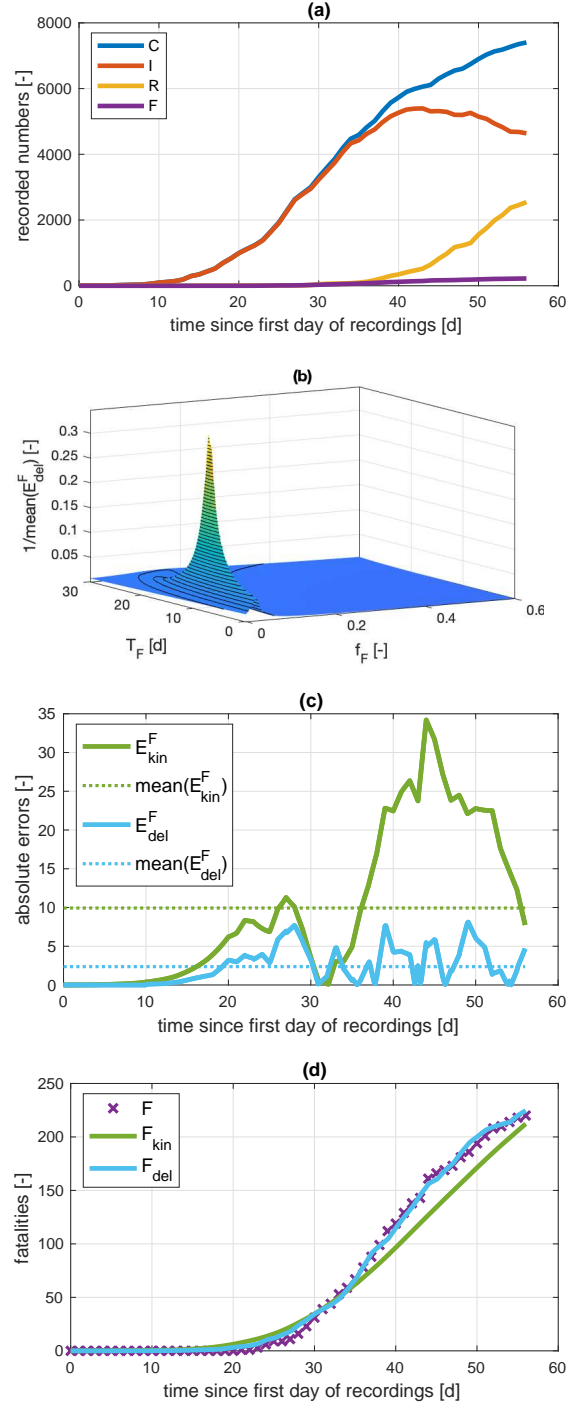

Figure 13: (a) Recorded data, (b) results of optimization based on infection-to-death delay rule, (c) absolute errors based on optimized parameter estimates, and (d) comparison between model-predicted fatalities based on optimized parameter estimates and recorded fatalities for Czech Republic

Table 14: Data recorded in Denmark

| Date   | $C$  | $\Delta C$ | $I$  | $\Delta I$ | $F$ | $\Delta F$ | $R$  | $\Delta R$ |
|--------|------|------------|------|------------|-----|------------|------|------------|
| Feb 27 | 1    | 1          | 1    | 1          | 0   | 0          | 0    | 0          |
| Feb 28 | 2    | 1          | 2    | 1          | 0   | 0          | 0    | 0          |
| Feb 29 | 3    | 1          | 3    | 1          | 0   | 0          | 0    | 0          |
| Mar 1  | 4    | 1          | 4    | 1          | 0   | 0          | 0    | 0          |
| Mar 2  | 4    | 0          | 4    | 0          | 0   | 0          | 0    | 0          |
| Mar 3  | 10   | 6          | 10   | 6          | 0   | 0          | 0    | 0          |
| Mar 4  | 14   | 4          | 14   | 4          | 0   | 0          | 0    | 0          |
| Mar 5  | 19   | 5          | 18   | 4          | 0   | 0          | 1    | 1          |
| Mar 6  | 21   | 2          | 20   | 2          | 0   | 0          | 1    | 0          |
| Mar 7  | 27   | 6          | 26   | 6          | 0   | 0          | 1    | 0          |
| Mar 8  | 35   | 8          | 34   | 8          | 0   | 0          | 1    | 0          |
| Mar 9  | 90   | 55         | 89   | 55         | 0   | 0          | 1    | 0          |
| Mar 10 | 262  | 172        | 261  | 172        | 0   | 0          | 1    | 0          |
| Mar 11 | 514  | 252        | 513  | 252        | 0   | 0          | 1    | 0          |
| Mar 12 | 674  | 160        | 673  | 160        | 0   | 0          | 1    | 0          |
| Mar 13 | 804  | 130        | 803  | 130        | 0   | 0          | 1    | 0          |
| Mar 14 | 836  | 32         | 834  | 31         | 1   | 1          | 1    | 0          |
| Mar 15 | 864  | 28         | 861  | 27         | 2   | 1          | 1    | 0          |
| Mar 16 | 914  | 50         | 909  | 48         | 4   | 2          | 1    | 0          |
| Mar 17 | 977  | 63         | 972  | 63         | 4   | 0          | 1    | 0          |
| Mar 18 | 1057 | 80         | 1052 | 80         | 4   | 0          | 1    | 0          |
| Mar 19 | 1151 | 94         | 1144 | 92         | 6   | 2          | 1    | 0          |
| Mar 20 | 1255 | 104        | 1245 | 101        | 9   | 3          | 1    | 0          |
| Mar 21 | 1326 | 71         | 1312 | 67         | 13  | 4          | 1    | 0          |
| Mar 22 | 1395 | 69         | 1381 | 69         | 13  | 0          | 1    | 0          |
| Mar 23 | 1460 | 65         | 1435 | 54         | 24  | 11         | 1    | 0          |
| Mar 24 | 1591 | 131        | 1558 | 123        | 32  | 8          | 1    | 0          |
| Mar 25 | 1724 | 133        | 1689 | 131        | 34  | 2          | 1    | 0          |
| Mar 26 | 1877 | 153        | 1835 | 146        | 41  | 7          | 1    | 0          |
| Mar 27 | 2046 | 169        | 1993 | 158        | 52  | 11         | 1    | 0          |
| Mar 28 | 2201 | 155        | 2135 | 142        | 65  | 13         | 1    | 0          |
| Mar 29 | 2395 | 194        | 2322 | 187        | 72  | 7          | 1    | 0          |
| Mar 30 | 2577 | 182        | 2499 | 177        | 77  | 5          | 1    | 0          |
| Mar 31 | 2860 | 283        | 2769 | 270        | 90  | 13         | 1    | 0          |
| Apr 1  | 3107 | 247        | 2109 | -660       | 104 | 14         | 894  | 893        |
| Apr 2  | 3386 | 279        | 2174 | 65         | 123 | 19         | 1089 | 195        |
| Apr 3  | 3757 | 371        | 2425 | 251        | 139 | 16         | 1193 | 104        |
| Apr 4  | 4077 | 320        | 2633 | 208        | 161 | 22         | 1283 | 90         |
| Apr 5  | 4369 | 292        | 2863 | 230        | 179 | 18         | 1327 | 44         |
| Apr 6  | 4681 | 312        | 3116 | 253        | 187 | 8          | 1378 | 51         |
| Apr 7  | 5071 | 390        | 3377 | 261        | 203 | 16         | 1491 | 113        |
| Apr 8  | 5402 | 331        | 3563 | 186        | 218 | 15         | 1621 | 130        |
| Apr 9  | 5635 | 233        | 3662 | 99         | 237 | 19         | 1736 | 115        |
| Apr 10 | 5819 | 184        | 3799 | 137        | 247 | 10         | 1773 | 37         |
| Apr 11 | 5996 | 177        | 3781 | -18        | 260 | 13         | 1955 | 182        |
| Apr 12 | 6174 | 178        | 3778 | -3         | 273 | 13         | 2123 | 168        |
| Apr 13 | 6318 | 144        | 3798 | 20         | 285 | 12         | 2235 | 112        |
| Apr 14 | 6511 | 193        | 3697 | -101       | 299 | 14         | 2515 | 280        |
| Apr 15 | 6681 | 170        | 3624 | -73        | 309 | 10         | 2748 | 233        |
| Apr 16 | 6879 | 198        | 3535 | -89        | 321 | 12         | 3023 | 275        |
| Apr 17 | 7073 | 194        | 3348 | -187       | 336 | 15         | 3389 | 366        |
| Apr 18 | 7242 | 169        | 3049 | -299       | 346 | 10         | 3847 | 458        |
| Apr 19 | 7384 | 142        | 2888 | -161       | 355 | 9          | 4141 | 294        |
| Apr 20 | 7515 | 131        | 2839 | -49        | 364 | 9          | 4312 | 171        |
| Apr 21 | 7695 | 180        | 2625 | -214       | 370 | 6          | 4700 | 388        |
| Apr 22 | 7912 | 217        | 2441 | -184       | 384 | 14         | 5087 | 387        |
| Apr 23 | 8073 | 161        | 2295 | -146       | 394 | 10         | 5384 | 297        |
| Apr 24 | 8210 | 137        | 2281 | -14        | 403 | 9          | 5526 | 142        |
| Apr 25 | 8445 | 235        | 2358 | 77         | 418 | 15         | 5669 | 143        |
| Apr 26 | 8575 | 130        | 2348 | -10        | 422 | 4          | 5805 | 136        |

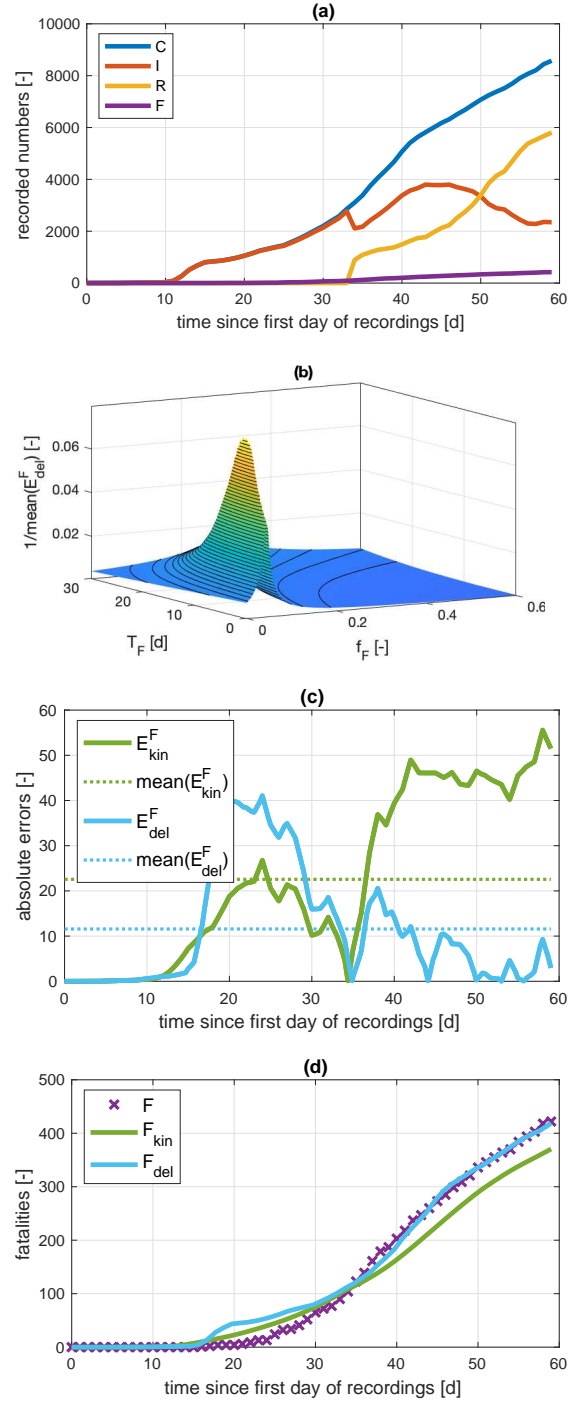

Figure 14: (a) Recorded data, (b) results of optimization based on infection-to-death delay rule, (c) absolute errors based on optimized parameter estimates, and (d) comparison between model-predicted fatalities based on optimized parameter estimates and recorded fatalities for Denmark



Table 15: Data recorded in Dominican Republic

| Date   | C    | $\Delta C$ | I    | $\Delta I$ | F   | $\Delta F$ | R   | $\Delta R$ |
|--------|------|------------|------|------------|-----|------------|-----|------------|
| Mar 1  | 1    | 1          | 1    | 1          | 0   | 0          | 0   | 0          |
| Mar 2  | 1    | 0          | 1    | 0          | 0   | 0          | 0   | 0          |
| Mar 3  | 1    | 0          | 1    | 0          | 0   | 0          | 0   | 0          |
| Mar 4  | 1    | 0          | 1    | 0          | 0   | 0          | 0   | 0          |
| Mar 5  | 1    | 0          | 1    | 0          | 0   | 0          | 0   | 0          |
| Mar 6  | 2    | 1          | 2    | 1          | 0   | 0          | 0   | 0          |
| Mar 7  | 2    | 0          | 2    | 0          | 0   | 0          | 0   | 0          |
| Mar 8  | 5    | 3          | 5    | 3          | 0   | 0          | 0   | 0          |
| Mar 9  | 5    | 0          | 5    | 0          | 0   | 0          | 0   | 0          |
| Mar 10 | 5    | 0          | 5    | 0          | 0   | 0          | 0   | 0          |
| Mar 11 | 5    | 0          | 5    | 0          | 0   | 0          | 0   | 0          |
| Mar 12 | 5    | 0          | 5    | 0          | 0   | 0          | 0   | 0          |
| Mar 13 | 5    | 0          | 5    | 0          | 0   | 0          | 0   | 0          |
| Mar 14 | 11   | 6          | 11   | 6          | 0   | 0          | 0   | 0          |
| Mar 15 | 11   | 0          | 11   | 0          | 0   | 0          | 0   | 0          |
| Mar 16 | 21   | 10         | 20   | 9          | 1   | 1          | 0   | 0          |
| Mar 17 | 21   | 0          | 20   | 0          | 1   | 0          | 0   | 0          |
| Mar 18 | 34   | 13         | 32   | 12         | 2   | 1          | 0   | 0          |
| Mar 19 | 34   | 0          | 32   | 0          | 2   | 0          | 0   | 0          |
| Mar 20 | 72   | 38         | 70   | 38         | 2   | 0          | 0   | 0          |
| Mar 21 | 112  | 40         | 109  | 39         | 3   | 1          | 0   | 0          |
| Mar 22 | 202  | 90         | 199  | 90         | 3   | 0          | 0   | 0          |
| Mar 23 | 245  | 43         | 239  | 40         | 3   | 0          | 3   | 3          |
| Mar 24 | 312  | 67         | 303  | 64         | 6   | 3          | 3   | 0          |
| Mar 25 | 392  | 80         | 379  | 76         | 10  | 4          | 3   | 0          |
| Mar 26 | 488  | 96         | 475  | 96         | 10  | 0          | 3   | 0          |
| Mar 27 | 581  | 93         | 558  | 83         | 20  | 10         | 3   | 0          |
| Mar 28 | 719  | 138        | 688  | 130        | 28  | 8          | 3   | 0          |
| Mar 29 | 859  | 140        | 817  | 129        | 39  | 11         | 3   | 0          |
| Mar 30 | 901  | 42         | 855  | 38         | 42  | 3          | 4   | 1          |
| Mar 31 | 1109 | 208        | 1053 | 198        | 51  | 9          | 5   | 1          |
| Apr 1  | 1284 | 175        | 1218 | 165        | 57  | 6          | 9   | 4          |
| Apr 2  | 1380 | 96         | 1304 | 86         | 60  | 3          | 16  | 7          |
| Apr 3  | 1488 | 108        | 1404 | 100        | 68  | 8          | 16  | 0          |
| Apr 4  | 1578 | 90         | 1484 | 80         | 77  | 9          | 17  | 1          |
| Apr 5  | 1745 | 167        | 1646 | 162        | 82  | 5          | 17  | 0          |
| Apr 6  | 1828 | 83         | 1709 | 63         | 86  | 4          | 33  | 16         |
| Apr 7  | 1956 | 128        | 1822 | 113        | 98  | 12         | 36  | 3          |
| Apr 8  | 2111 | 155        | 1953 | 131        | 108 | 10         | 50  | 14         |
| Apr 9  | 2349 | 238        | 2151 | 198        | 118 | 10         | 80  | 30         |
| Apr 10 | 2620 | 271        | 2396 | 245        | 126 | 8          | 98  | 18         |
| Apr 11 | 2759 | 139        | 2516 | 120        | 135 | 9          | 108 | 10         |
| Apr 12 | 2967 | 208        | 2663 | 147        | 173 | 38         | 131 | 23         |
| Apr 13 | 3167 | 200        | 2838 | 175        | 177 | 4          | 152 | 21         |
| Apr 14 | 3286 | 119        | 2941 | 103        | 183 | 6          | 162 | 10         |
| Apr 15 | 3614 | 328        | 3217 | 276        | 189 | 6          | 208 | 46         |
| Apr 16 | 3755 | 141        | 3344 | 127        | 196 | 7          | 215 | 7          |
| Apr 17 | 4126 | 371        | 3658 | 314        | 200 | 4          | 268 | 53         |
| Apr 18 | 4335 | 209        | 3806 | 148        | 217 | 17         | 312 | 44         |
| Apr 19 | 4680 | 345        | 4091 | 285        | 226 | 9          | 363 | 51         |
| Apr 20 | 4964 | 284        | 4313 | 222        | 235 | 9          | 416 | 53         |
| Apr 21 | 5044 | 80         | 4336 | 23         | 245 | 10         | 463 | 47         |
| Apr 22 | 5300 | 256        | 4459 | 123        | 260 | 15         | 581 | 118        |
| Apr 23 | 5543 | 243        | 4697 | 238        | 265 | 5          | 581 | 0          |
| Apr 24 | 5749 | 206        | 4719 | 22         | 267 | 2          | 763 | 182        |
| Apr 25 | 5926 | 177        | 4831 | 112        | 273 | 6          | 822 | 59         |
| Apr 26 | 6135 | 209        | 4947 | 116        | 278 | 5          | 910 | 88         |

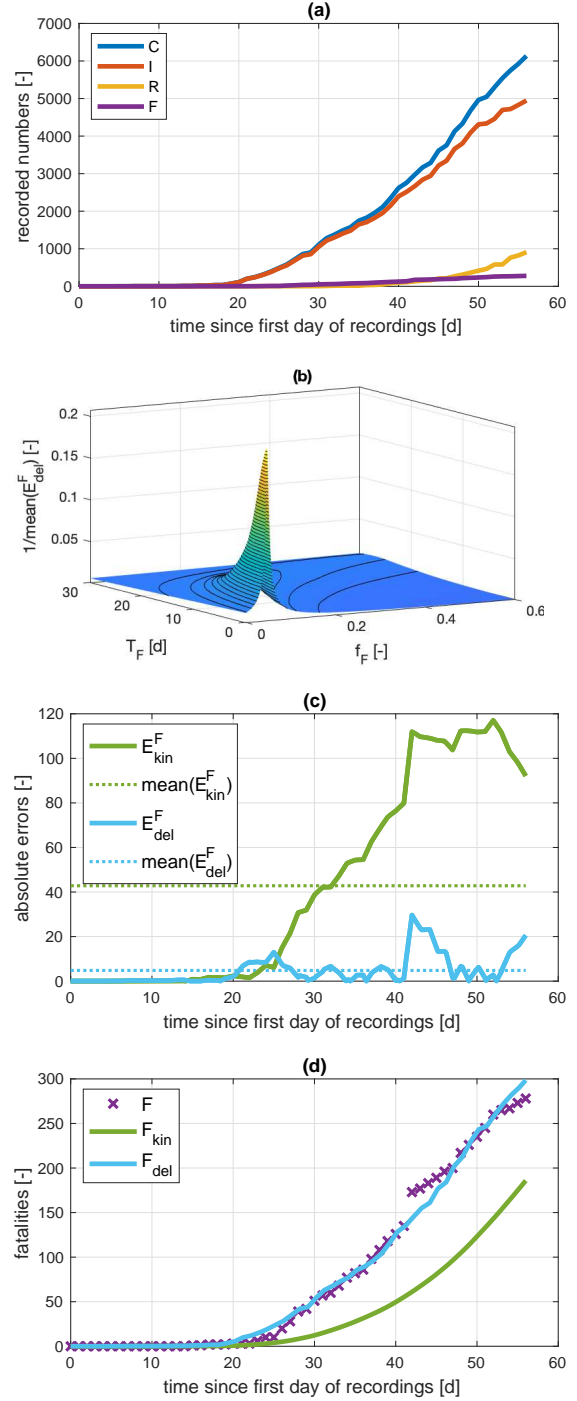

Figure 15: (a) Recorded data, (b) results of optimization based on infection-to-death delay rule, (c) absolute errors based on optimized parameter estimates, and (d) comparison between model-predicted fatalities based on optimized parameter estimates and recorded fatalities for Dominican Republic

Table 16: Data recorded in Ecuador

| Date   | C     | $\Delta C$ | I     | $\Delta I$ | F   | $\Delta F$ | R    | $\Delta R$ |
|--------|-------|------------|-------|------------|-----|------------|------|------------|
| Feb 29 | 1     | 1          | 1     | 1          | 0   | 0          | 0    | 0          |
| Mar 1  | 6     | 5          | 6     | 5          | 0   | 0          | 0    | 0          |
| Mar 2  | 6     | 0          | 6     | 0          | 0   | 0          | 0    | 0          |
| Mar 3  | 7     | 1          | 7     | 1          | 0   | 0          | 0    | 0          |
| Mar 4  | 10    | 3          | 10    | 3          | 0   | 0          | 0    | 0          |
| Mar 5  | 13    | 3          | 13    | 3          | 0   | 0          | 0    | 0          |
| Mar 6  | 13    | 0          | 13    | 0          | 0   | 0          | 0    | 0          |
| Mar 7  | 14    | 1          | 14    | 1          | 0   | 0          | 0    | 0          |
| Mar 8  | 14    | 0          | 14    | 0          | 0   | 0          | 0    | 0          |
| Mar 9  | 15    | 1          | 15    | 1          | 0   | 0          | 0    | 0          |
| Mar 10 | 17    | 2          | 17    | 2          | 0   | 0          | 0    | 0          |
| Mar 11 | 17    | 0          | 17    | 0          | 0   | 0          | 0    | 0          |
| Mar 12 | 17    | 0          | 17    | 0          | 0   | 0          | 0    | 0          |
| Mar 13 | 23    | 6          | 22    | 5          | 1   | 1          | 0    | 0          |
| Mar 14 | 28    | 5          | 26    | 4          | 2   | 1          | 0    | 0          |
| Mar 15 | 37    | 9          | 35    | 9          | 2   | 0          | 0    | 0          |
| Mar 16 | 58    | 21         | 56    | 21         | 2   | 0          | 0    | 0          |
| Mar 17 | 111   | 53         | 109   | 53         | 2   | 0          | 0    | 0          |
| Mar 18 | 168   | 57         | 164   | 55         | 3   | 1          | 1    | 1          |
| Mar 19 | 260   | 92         | 256   | 92         | 3   | 0          | 1    | 0          |
| Mar 20 | 426   | 166        | 416   | 160        | 7   | 4          | 3    | 2          |
| Mar 21 | 532   | 106        | 522   | 106        | 7   | 0          | 3    | 0          |
| Mar 22 | 789   | 257        | 772   | 250        | 14  | 7          | 3    | 0          |
| Mar 23 | 981   | 192        | 960   | 188        | 18  | 4          | 3    | 0          |
| Mar 24 | 1082  | 101        | 1052  | 92         | 27  | 9          | 3    | 0          |
| Mar 25 | 1211  | 129        | 1179  | 127        | 29  | 2          | 3    | 0          |
| Mar 26 | 1403  | 192        | 1366  | 187        | 34  | 5          | 3    | 0          |
| Mar 27 | 1627  | 224        | 1583  | 217        | 41  | 7          | 3    | 0          |
| Mar 28 | 1823  | 196        | 1772  | 189        | 48  | 7          | 3    | 0          |
| Mar 29 | 1924  | 101        | 1863  | 91         | 58  | 10         | 3    | 0          |
| Mar 30 | 1966  | 42         | 1901  | 38         | 62  | 4          | 3    | 0          |
| Mar 31 | 2302  | 336        | 2165  | 264        | 79  | 17         | 58   | 55         |
| Apr 1  | 2758  | 456        | 2602  | 437        | 98  | 19         | 58   | 0          |
| Apr 2  | 3163  | 405        | 2978  | 376        | 120 | 22         | 65   | 7          |
| Apr 3  | 3368  | 205        | 3158  | 180        | 145 | 25         | 65   | 0          |
| Apr 4  | 3465  | 97         | 3193  | 35         | 172 | 27         | 100  | 35         |
| Apr 5  | 3646  | 181        | 3366  | 173        | 180 | 8          | 100  | 0          |
| Apr 6  | 3747  | 101        | 3456  | 90         | 191 | 11         | 100  | 0          |
| Apr 7  | 3995  | 248        | 3635  | 179        | 220 | 29         | 140  | 40         |
| Apr 8  | 4450  | 455        | 4068  | 433        | 242 | 22         | 140  | 0          |
| Apr 9  | 4965  | 515        | 4354  | 286        | 272 | 30         | 339  | 199        |
| Apr 10 | 7161  | 2196       | 6496  | 2142       | 297 | 25         | 368  | 29         |
| Apr 11 | 7257  | 96         | 6531  | 35         | 315 | 18         | 411  | 43         |
| Apr 12 | 7466  | 209        | 6632  | 101        | 333 | 18         | 501  | 90         |
| Apr 13 | 7529  | 63         | 6577  | -55        | 355 | 22         | 597  | 96         |
| Apr 14 | 7603  | 74         | 6538  | -39        | 369 | 14         | 696  | 99         |
| Apr 15 | 7858  | 255        | 6690  | 152        | 388 | 19         | 780  | 84         |
| Apr 16 | 8225  | 367        | 6984  | 294        | 403 | 15         | 838  | 58         |
| Apr 17 | 8450  | 225        | 7191  | 207        | 421 | 18         | 838  | 0          |
| Apr 18 | 9022  | 572        | 7558  | 367        | 456 | 35         | 1008 | 170        |
| Apr 19 | 9468  | 446        | 7933  | 375        | 474 | 18         | 1061 | 53         |
| Apr 20 | 10128 | 660        | 8471  | 538        | 507 | 33         | 1150 | 89         |
| Apr 21 | 10398 | 270        | 8671  | 200        | 520 | 13         | 1207 | 57         |
| Apr 22 | 10850 | 452        | 9051  | 380        | 537 | 17         | 1262 | 55         |
| Apr 23 | 11183 | 333        | 9295  | 244        | 560 | 23         | 1328 | 66         |
| Apr 24 | 22719 | 11536      | 20777 | 11482      | 576 | 16         | 1366 | 38         |
| Apr 25 | 22719 | 0          | 20777 | 0          | 576 | 0          | 1366 | 0          |
| Apr 26 | 22719 | 0          | 20777 | 0          | 576 | 0          | 1366 | 0          |

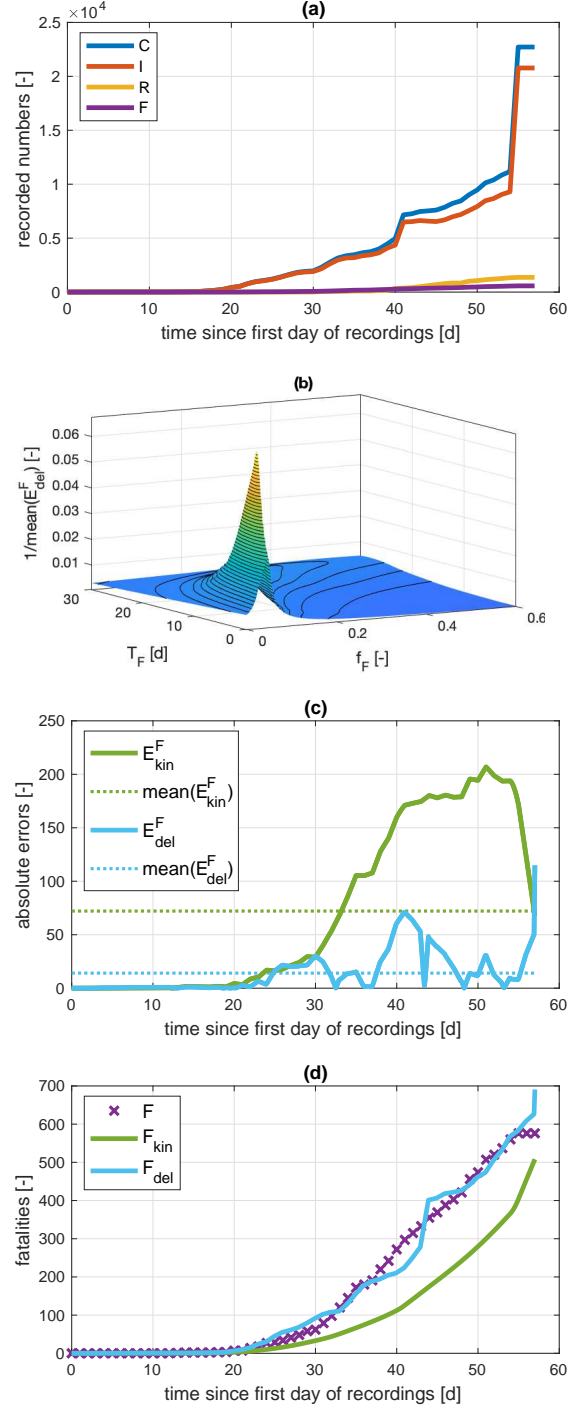

Figure 16: (a) Recorded data, (b) results of optimization based on infection-to-death delay rule, (c) absolute errors based on optimized parameter estimates, and (d) comparison between model-predicted fatalities based on optimized parameter estimates and recorded fatalities for Ecuador

Table 17: Data recorded in Egypt

| Date   | $C$  | $\Delta C$ | $I$  | $\Delta I$ | $F$ | $\Delta F$ | $R$  | $\Delta R$ |
|--------|------|------------|------|------------|-----|------------|------|------------|
| Feb 15 | 1    | 1          | 1    | 1          | 0   | 0          | 0    | 0          |
| Feb 16 | 1    | 0          | 1    | 0          | 0   | 0          | 0    | 0          |
| Feb 17 | 1    | 0          | 1    | 0          | 0   | 0          | 0    | 0          |
| Feb 18 | 1    | 0          | 1    | 0          | 0   | 0          | 0    | 0          |
| Feb 19 | 1    | 0          | 1    | 0          | 0   | 0          | 0    | 0          |
| Feb 20 | 1    | 0          | 0    | -1         | 0   | 0          | 1    | 1          |
| Feb 21 | 1    | 0          | 0    | 0          | 0   | 0          | 1    | 0          |
| Feb 22 | 1    | 0          | 0    | 0          | 0   | 0          | 1    | 0          |
| Feb 23 | 1    | 0          | 0    | 0          | 0   | 0          | 1    | 0          |
| Feb 24 | 1    | 0          | 0    | 0          | 0   | 0          | 1    | 0          |
| Feb 25 | 1    | 0          | 0    | 0          | 0   | 0          | 1    | 0          |
| Feb 26 | 1    | 0          | 0    | 0          | 0   | 0          | 1    | 0          |
| Feb 27 | 1    | 0          | 0    | 0          | 0   | 0          | 1    | 0          |
| Feb 28 | 1    | 0          | 0    | 0          | 0   | 0          | 1    | 0          |
| Feb 29 | 1    | 0          | 0    | 0          | 0   | 0          | 1    | 0          |
| Mar 1  | 2    | 1          | 1    | 1          | 0   | 0          | 1    | 0          |
| Mar 2  | 2    | 0          | 1    | 0          | 0   | 0          | 1    | 0          |
| Mar 3  | 2    | 0          | 1    | 0          | 0   | 0          | 1    | 0          |
| Mar 4  | 2    | 0          | 1    | 0          | 0   | 0          | 1    | 0          |
| Mar 5  | 3    | 1          | 2    | 1          | 0   | 0          | 1    | 0          |
| Mar 6  | 15   | 12         | 14   | 12         | 0   | 0          | 1    | 0          |
| Mar 7  | 48   | 33         | 47   | 33         | 0   | 0          | 1    | 0          |
| Mar 8  | 55   | 7          | 53   | 6          | 1   | 1          | 1    | 0          |
| Mar 9  | 59   | 4          | 57   | 4          | 1   | 0          | 1    | 0          |
| Mar 10 | 59   | 0          | 32   | -25        | 1   | 0          | 26   | 25         |
| Mar 11 | 67   | 8          | 39   | 7          | 1   | 0          | 27   | 1          |
| Mar 12 | 80   | 13         | 51   | 12         | 2   | 1          | 27   | 0          |
| Mar 13 | 93   | 13         | 64   | 13         | 2   | 0          | 27   | 0          |
| Mar 14 | 110  | 17         | 81   | 17         | 2   | 0          | 27   | 0          |
| Mar 15 | 126  | 16         | 92   | 11         | 2   | 0          | 32   | 5          |
| Mar 16 | 166  | 40         | 130  | 38         | 4   | 2          | 32   | 0          |
| Mar 17 | 196  | 30         | 164  | 34         | 6   | 2          | 26   | -6         |
| Mar 18 | 210  | 14         | 176  | 12         | 6   | 0          | 28   | 2          |
| Mar 19 | 256  | 46         | 207  | 31         | 7   | 1          | 42   | 14         |
| Mar 20 | 285  | 29         | 235  | 28         | 8   | 1          | 42   | 0          |
| Mar 21 | 294  | 9          | 242  | 7          | 10  | 2          | 42   | 0          |
| Mar 22 | 327  | 33         | 257  | 15         | 14  | 4          | 56   | 14         |
| Mar 23 | 366  | 39         | 279  | 22         | 19  | 5          | 68   | 12         |
| Mar 24 | 402  | 36         | 302  | 23         | 20  | 1          | 80   | 12         |
| Mar 25 | 456  | 54         | 340  | 38         | 21  | 1          | 95   | 15         |
| Mar 26 | 496  | 40         | 369  | 29         | 24  | 3          | 103  | 8          |
| Mar 27 | 536  | 40         | 390  | 21         | 30  | 6          | 116  | 13         |
| Mar 28 | 576  | 40         | 419  | 29         | 36  | 6          | 121  | 5          |
| Mar 29 | 609  | 33         | 437  | 18         | 40  | 4          | 132  | 11         |
| Mar 30 | 656  | 47         | 465  | 28         | 41  | 1          | 150  | 18         |
| Mar 31 | 710  | 54         | 507  | 42         | 46  | 5          | 157  | 7          |
| Apr 1  | 779  | 69         | 548  | 41         | 52  | 6          | 179  | 22         |
| Apr 2  | 865  | 86         | 606  | 58         | 58  | 6          | 201  | 22         |
| Apr 3  | 985  | 120        | 703  | 97         | 66  | 8          | 216  | 15         |
| Apr 4  | 1070 | 85         | 758  | 55         | 71  | 5          | 241  | 25         |
| Apr 5  | 1173 | 103        | 848  | 90         | 78  | 7          | 247  | 6          |
| Apr 6  | 1322 | 149        | 978  | 130        | 85  | 7          | 259  | 12         |
| Apr 7  | 1450 | 128        | 1080 | 102        | 94  | 9          | 276  | 17         |
| Apr 8  | 1560 | 110        | 1152 | 72         | 103 | 9          | 305  | 29         |
| Apr 9  | 1699 | 139        | 1233 | 81         | 118 | 15         | 348  | 43         |
| Apr 10 | 1794 | 95         | 1275 | 42         | 135 | 17         | 384  | 36         |
| Apr 11 | 1939 | 145        | 1367 | 92         | 146 | 11         | 426  | 42         |
| Apr 12 | 2065 | 126        | 1317 | -50        | 159 | 13         | 589  | 163        |
| Apr 13 | 2190 | 125        | 1437 | 120        | 164 | 5          | 589  | 0          |
| Apr 14 | 2350 | 160        | 1583 | 146        | 178 | 14         | 589  | 0          |
| Apr 15 | 2505 | 155        | 1733 | 150        | 183 | 5          | 589  | 0          |
| Apr 16 | 2673 | 168        | 1881 | 148        | 196 | 13         | 596  | 7          |
| Apr 17 | 2844 | 171        | 1993 | 112        | 205 | 9          | 646  | 50         |
| Apr 18 | 3032 | 188        | 2107 | 114        | 224 | 19         | 701  | 55         |
| Apr 19 | 3144 | 112        | 2173 | 66         | 239 | 15         | 732  | 31         |
| Apr 20 | 3333 | 189        | 2262 | 89         | 250 | 11         | 821  | 89         |
| Apr 21 | 3490 | 157        | 2356 | 94         | 264 | 14         | 870  | 49         |
| Apr 22 | 3659 | 169        | 2448 | 92         | 276 | 12         | 935  | 65         |
| Apr 23 | 3891 | 232        | 2600 | 152        | 287 | 11         | 1004 | 69         |
| Apr 24 | 4092 | 201        | 2723 | 123        | 294 | 7          | 1075 | 71         |
| Apr 25 | 4319 | 227        | 2898 | 175        | 307 | 13         | 1114 | 39         |
| Apr 26 | 4534 | 215        | 3041 | 143        | 317 | 10         | 1176 | 62         |

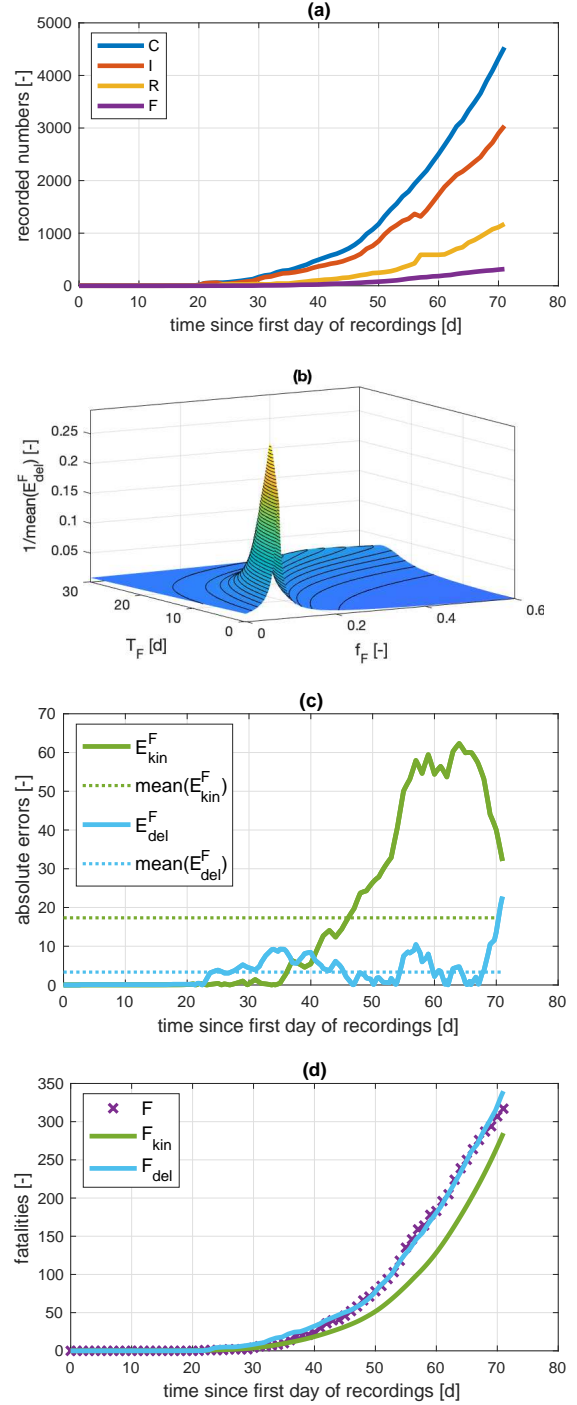

Figure 17: (a) Recorded data, (b) results of optimization based on infection-to-death delay rule, (c) absolute errors based on optimized parameter estimates, and (d) comparison between model-predicted fatalities based on optimized parameter estimates and recorded fatalities for Egypt

Table 18: Data recorded in Finland

| Date   | $C$  | $\Delta C$ | $I$  | $\Delta I$ | $F$ | $\Delta F$ | $R$  | $\Delta R$ |
|--------|------|------------|------|------------|-----|------------|------|------------|
| Feb 15 | 1    | 1          | 0    | 0          | 0   | 0          | 1    | 1          |
| Feb 16 | 1    | 0          | 0    | 0          | 0   | 0          | 1    | 0          |
| Feb 17 | 1    | 0          | 0    | 0          | 0   | 0          | 1    | 0          |
| Feb 18 | 1    | 0          | 0    | 0          | 0   | 0          | 1    | 0          |
| Feb 19 | 1    | 0          | 0    | 0          | 0   | 0          | 1    | 0          |
| Feb 20 | 1    | 0          | 0    | 0          | 0   | 0          | 1    | 0          |
| Feb 21 | 1    | 0          | 0    | 0          | 0   | 0          | 1    | 0          |
| Feb 22 | 1    | 0          | 0    | 0          | 0   | 0          | 1    | 0          |
| Feb 23 | 1    | 0          | 0    | 0          | 0   | 0          | 1    | 0          |
| Feb 24 | 1    | 0          | 0    | 0          | 0   | 0          | 1    | 0          |
| Feb 25 | 1    | 0          | 0    | 0          | 0   | 0          | 1    | 0          |
| Feb 26 | 2    | 1          | 1    | 1          | 0   | 0          | 1    | 0          |
| Feb 27 | 2    | 0          | 1    | 0          | 0   | 0          | 1    | 0          |
| Feb 28 | 3    | 1          | 2    | 1          | 0   | 0          | 1    | 0          |
| Feb 29 | 3    | 0          | 2    | 0          | 0   | 0          | 1    | 0          |
| Mar 1  | 6    | 3          | 5    | 3          | 0   | 0          | 1    | 0          |
| Mar 2  | 7    | 1          | 6    | 1          | 0   | 0          | 1    | 0          |
| Mar 3  | 7    | 0          | 6    | 0          | 0   | 0          | 1    | 0          |
| Mar 4  | 7    | 0          | 6    | 0          | 0   | 0          | 1    | 0          |
| Mar 5  | 12   | 5          | 11   | 5          | 0   | 0          | 1    | 0          |
| Mar 6  | 15   | 3          | 14   | 3          | 0   | 0          | 1    | 0          |
| Mar 7  | 19   | 4          | 18   | 4          | 0   | 0          | 1    | 0          |
| Mar 8  | 25   | 6          | 24   | 6          | 0   | 0          | 1    | 0          |
| Mar 9  | 33   | 8          | 32   | 8          | 0   | 0          | 1    | 0          |
| Mar 10 | 40   | 7          | 39   | 7          | 0   | 0          | 1    | 0          |
| Mar 11 | 65   | 25         | 64   | 25         | 0   | 0          | 1    | 0          |
| Mar 12 | 109  | 44         | 108  | 44         | 0   | 0          | 1    | 0          |
| Mar 13 | 155  | 46         | 154  | 46         | 0   | 0          | 1    | 0          |
| Mar 14 | 225  | 70         | 215  | 61         | 0   | 0          | 10   | 9          |
| Mar 15 | 244  | 19         | 234  | 19         | 0   | 0          | 10   | 0          |
| Mar 16 | 278  | 34         | 268  | 34         | 0   | 0          | 10   | 0          |
| Mar 17 | 322  | 44         | 312  | 44         | 0   | 0          | 10   | 0          |
| Mar 18 | 359  | 37         | 349  | 37         | 0   | 0          | 10   | 0          |
| Mar 19 | 400  | 41         | 390  | 41         | 0   | 0          | 10   | 0          |
| Mar 20 | 450  | 50         | 440  | 50         | 0   | 0          | 10   | 0          |
| Mar 21 | 523  | 73         | 512  | 72         | 1   | 1          | 10   | 0          |
| Mar 22 | 626  | 103        | 615  | 103        | 1   | 0          | 10   | 0          |
| Mar 23 | 700  | 74         | 689  | 74         | 1   | 0          | 10   | 0          |
| Mar 24 | 792  | 92         | 781  | 92         | 1   | 0          | 10   | 0          |
| Mar 25 | 880  | 88         | 867  | 86         | 3   | 2          | 10   | 0          |
| Mar 26 | 958  | 78         | 943  | 76         | 5   | 2          | 10   | 0          |
| Mar 27 | 1041 | 83         | 1024 | 81         | 7   | 2          | 10   | 0          |
| Mar 28 | 1167 | 126        | 1148 | 124        | 9   | 2          | 10   | 0          |
| Mar 29 | 1240 | 73         | 1219 | 71         | 11  | 2          | 10   | 0          |
| Mar 30 | 1352 | 112        | 1329 | 110        | 13  | 2          | 10   | 0          |
| Mar 31 | 1418 | 66         | 1391 | 62         | 17  | 4          | 10   | 0          |
| Apr 1  | 1446 | 28         | 1419 | 28         | 17  | 0          | 10   | 0          |
| Apr 2  | 1518 | 72         | 1199 | -220       | 19  | 2          | 300  | 290        |
| Apr 3  | 1615 | 97         | 1295 | 96         | 20  | 1          | 300  | 0          |
| Apr 4  | 1882 | 267        | 1557 | 262        | 25  | 5          | 300  | 0          |
| Apr 5  | 1927 | 45         | 1599 | 42         | 28  | 3          | 300  | 0          |
| Apr 6  | 2176 | 249        | 1849 | 250        | 27  | -1         | 300  | 0          |
| Apr 7  | 2308 | 132        | 1974 | 125        | 34  | 7          | 300  | 0          |
| Apr 8  | 2487 | 179        | 2147 | 173        | 40  | 6          | 300  | 0          |
| Apr 9  | 2605 | 118        | 2263 | 116        | 42  | 2          | 300  | 0          |
| Apr 10 | 2769 | 164        | 2421 | 158        | 48  | 6          | 300  | 0          |
| Apr 11 | 2905 | 136        | 2556 | 135        | 49  | 1          | 300  | 0          |
| Apr 12 | 2974 | 69         | 2618 | 62         | 56  | 7          | 300  | 0          |
| Apr 13 | 3064 | 90         | 2705 | 87         | 59  | 3          | 300  | 0          |
| Apr 14 | 3161 | 97         | 2797 | 92         | 64  | 5          | 300  | 0          |
| Apr 15 | 3237 | 76         | 2865 | 68         | 72  | 8          | 300  | 0          |
| Apr 16 | 3369 | 132        | 1594 | -1271      | 75  | 3          | 1700 | 1400       |
| Apr 17 | 3489 | 120        | 1707 | 113        | 82  | 7          | 1700 | 0          |
| Apr 18 | 3681 | 192        | 1891 | 184        | 90  | 8          | 1700 | 0          |
| Apr 19 | 3783 | 102        | 1989 | 98         | 94  | 4          | 1700 | 0          |
| Apr 20 | 3868 | 85         | 1770 | -219       | 98  | 4          | 2000 | 300        |
| Apr 21 | 4014 | 146        | 1873 | 103        | 141 | 43         | 2000 | 0          |
| Apr 22 | 4129 | 115        | 1980 | 107        | 149 | 8          | 2000 | 0          |
| Apr 23 | 4284 | 155        | 2112 | 132        | 172 | 23         | 2000 | 0          |
| Apr 24 | 4395 | 111        | 1718 | -394       | 177 | 5          | 2500 | 500        |
| Apr 25 | 4475 | 80         | 1789 | 71         | 186 | 9          | 2500 | 0          |
| Apr 26 | 4576 | 101        | 1886 | 97         | 190 | 4          | 2500 | 0          |

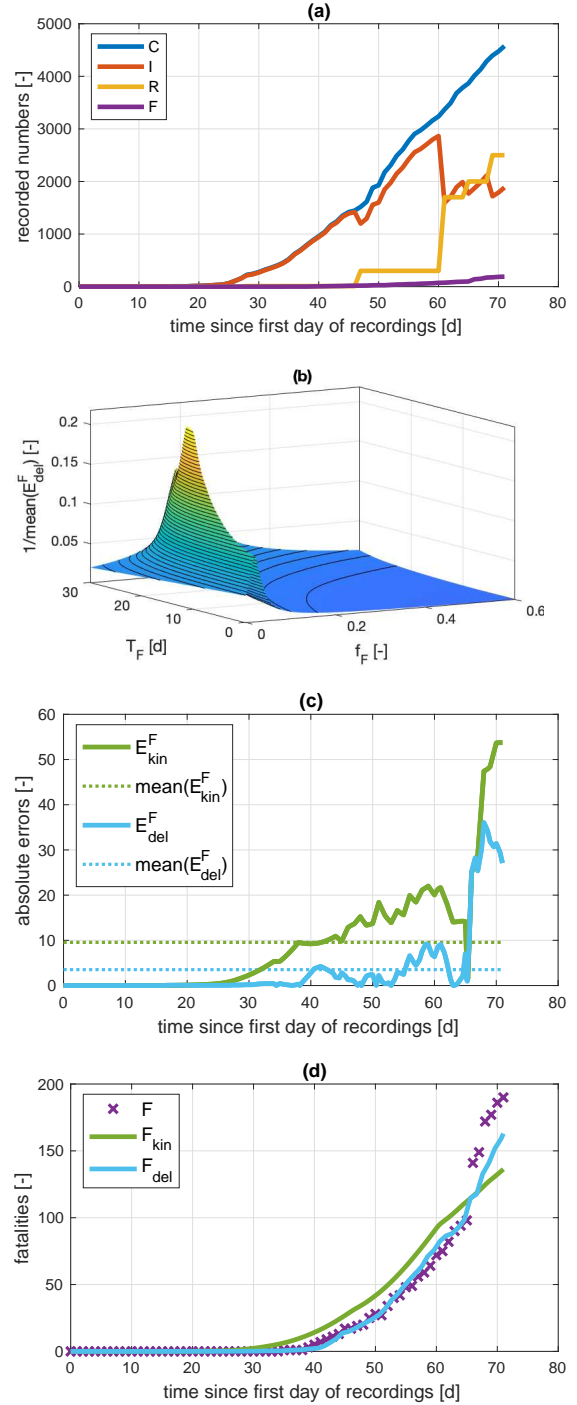

Figure 18: (a) Recorded data, (b) results of optimization based on infection-to-death delay rule, (c) absolute errors based on optimized parameter estimates, and (d) comparison between model-predicted fatalities based on optimized parameter estimates and recorded fatalities for Finland

Table 19: Data recorded in France

| Date   | $C$    | $\Delta C$ | $I$   | $\Delta I$ | $F$   | $\Delta F$ | $R$   | $\Delta R$ |
|--------|--------|------------|-------|------------|-------|------------|-------|------------|
| Feb 15 | 12     | 12         | 7     | 7          | 1     | 1          | 4     | 4          |
| Feb 16 | 12     | 0          | 7     | 0          | 1     | 0          | 4     | 0          |
| Feb 17 | 12     | 0          | 6     | -1         | 1     | 0          | 5     | 1          |
| Feb 18 | 12     | 0          | 4     | -2         | 1     | 0          | 7     | 2          |
| Feb 19 | 12     | 0          | 4     | 0          | 1     | 0          | 7     | 0          |
| Feb 20 | 12     | 0          | 4     | 0          | 1     | 0          | 7     | 0          |
| Feb 21 | 12     | 0          | 4     | 0          | 1     | 0          | 7     | 0          |
| Feb 22 | 12     | 0          | 1     | -3         | 1     | 0          | 10    | 3          |
| Feb 23 | 12     | 0          | 1     | 0          | 1     | 0          | 10    | 0          |
| Feb 24 | 12     | 0          | 0     | -1         | 1     | 0          | 11    | 1          |
| Feb 25 | 14     | 2          | 2     | 2          | 1     | 0          | 11    | 0          |
| Feb 26 | 18     | 4          | 5     | 3          | 2     | 1          | 11    | 0          |
| Feb 27 | 38     | 20         | 25    | 20         | 2     | 0          | 11    | 0          |
| Feb 28 | 57     | 19         | 44    | 19         | 2     | 0          | 11    | 0          |
| Feb 29 | 100    | 43         | 86    | 42         | 2     | 0          | 12    | 1          |
| Mar 1  | 130    | 30         | 116   | 30         | 2     | 0          | 12    | 0          |
| Mar 2  | 191    | 61         | 176   | 60         | 3     | 1          | 12    | 0          |
| Mar 3  | 212    | 21         | 196   | 20         | 4     | 1          | 12    | 0          |
| Mar 4  | 285    | 73         | 269   | 73         | 4     | 0          | 12    | 0          |
| Mar 5  | 423    | 138        | 404   | 135        | 7     | 3          | 12    | 0          |
| Mar 6  | 653    | 230        | 632   | 228        | 9     | 2          | 12    | 0          |
| Mar 7  | 949    | 296        | 921   | 289        | 16    | 7          | 12    | 0          |
| Mar 8  | 1209   | 260        | 1178  | 257        | 19    | 3          | 12    | 0          |
| Mar 9  | 1412   | 203        | 1370  | 192        | 30    | 11         | 12    | 0          |
| Mar 10 | 1784   | 372        | 1739  | 369        | 33    | 3          | 12    | 0          |
| Mar 11 | 2281   | 497        | 2221  | 482        | 48    | 15         | 12    | 0          |
| Mar 12 | 2876   | 595        | 2803  | 582        | 61    | 13         | 12    | 0          |
| Mar 13 | 3661   | 785        | 3570  | 767        | 79    | 18         | 12    | 0          |
| Mar 14 | 4499   | 838        | 4396  | 826        | 91    | 12         | 12    | 0          |
| Mar 15 | 5423   | 924        | 5284  | 888        | 127   | 36         | 12    | 0          |
| Mar 16 | 6633   | 1210       | 6473  | 1189       | 148   | 21         | 12    | 0          |
| Mar 17 | 7730   | 1097       | 6953  | 480        | 175   | 27         | 602   | 590        |
| Mar 18 | 9134   | 1404       | 8268  | 1315       | 264   | 89         | 602   | 0          |
| Mar 19 | 10995  | 1861       | 9328  | 1060       | 372   | 108        | 1295  | 693        |
| Mar 20 | 12612  | 1617       | 10575 | 1247       | 450   | 78         | 1587  | 292        |
| Mar 21 | 14459  | 1847       | 12310 | 1735       | 562   | 112        | 1587  | 0          |
| Mar 22 | 16018  | 1559       | 13144 | 834        | 674   | 112        | 2200  | 613        |
| Mar 23 | 19856  | 3838       | 16796 | 3652       | 860   | 186        | 2200  | 0          |
| Mar 24 | 22304  | 2448       | 17923 | 1127       | 1100  | 240        | 3281  | 1081       |
| Mar 25 | 25233  | 2929       | 20002 | 2079       | 1331  | 231        | 3900  | 619        |
| Mar 26 | 29155  | 3922       | 22511 | 2509       | 1696  | 365        | 4948  | 1048       |
| Mar 27 | 32964  | 3809       | 25269 | 2758       | 1995  | 299        | 5700  | 752        |
| Mar 28 | 37575  | 4611       | 29561 | 4292       | 2314  | 319        | 5700  | 0          |
| Mar 29 | 40174  | 2599       | 30366 | 805        | 2606  | 292        | 7202  | 1502       |
| Mar 30 | 44550  | 4376       | 33599 | 3233       | 3024  | 418        | 7927  | 725        |
| Mar 31 | 52128  | 7578       | 39161 | 5562       | 3523  | 499        | 9444  | 1517       |
| Apr 1  | 56989  | 4861       | 42022 | 2861       | 4032  | 509        | 10935 | 1491       |
| Apr 2  | 59105  | 2116       | 41290 | -732       | 5387  | 1355       | 12428 | 1493       |
| Apr 3  | 76460  | 17355      | 55945 | 14655      | 6507  | 1120       | 14008 | 1580       |
| Apr 4  | 83019  | 6559       | 60021 | 4076       | 7560  | 1053       | 15438 | 1430       |
| Apr 5  | 87719  | 4700       | 63458 | 3437       | 8078  | 518        | 16183 | 745        |
| Apr 6  | 90452  | 2733       | 64291 | 833        | 8911  | 833        | 17250 | 1067       |
| Apr 7  | 99180  | 8728       | 69515 | 5224       | 10328 | 1417       | 19337 | 2087       |
| Apr 8  | 103061 | 3881       | 70938 | 1423       | 10869 | 541        | 21254 | 1917       |
| Apr 9  | 107696 | 4635       | 72280 | 1342       | 12210 | 1341       | 23206 | 1952       |
| Apr 10 | 113927 | 6231       | 75798 | 3518       | 13197 | 987        | 24932 | 1726       |
| Apr 11 | 118178 | 4251       | 77955 | 2157       | 13832 | 635        | 26391 | 1459       |
| Apr 12 | 120633 | 2455       | 79054 | 1099       | 14393 | 561        | 27186 | 795        |
| Apr 13 | 124298 | 3665       | 81613 | 2559       | 14967 | 574        | 27718 | 532        |
| Apr 14 | 130253 | 5955       | 85719 | 4106       | 15729 | 762        | 28805 | 1087       |
| Apr 15 | 133644 | 3391       | 85522 | -197       | 17167 | 1438       | 30955 | 2150       |
| Apr 16 | 140772 | 7128       | 90040 | 4518       | 17920 | 753        | 32812 | 1857       |
| Apr 17 | 143116 | 2344       | 90015 | -25        | 18681 | 761        | 34420 | 1608       |
| Apr 18 | 146782 | 3666       | 91476 | 1461       | 19323 | 642        | 35983 | 1563       |
| Apr 19 | 147844 | 1062       | 91548 | 72         | 19718 | 395        | 36578 | 595        |
| Apr 20 | 150278 | 2434       | 92604 | 1056       | 20265 | 547        | 37409 | 831        |
| Apr 21 | 153531 | 3253       | 93554 | 950        | 20796 | 531        | 39181 | 1772       |
| Apr 22 | 155944 | 2413       | 93947 | 393        | 21340 | 544        | 40657 | 1476       |
| Apr 23 | 158183 | 2239       | 94239 | 292        | 21856 | 516        | 42088 | 1431       |
| Apr 24 | 159828 | 1645       | 94090 | -149       | 22245 | 389        | 43493 | 1405       |
| Apr 25 | 161488 | 1660       | 94280 | 190        | 22614 | 369        | 44594 | 1101       |
| Apr 26 | 162100 | 612        | 91341 | -2939      | 22856 | 242        | 47903 | 3309       |

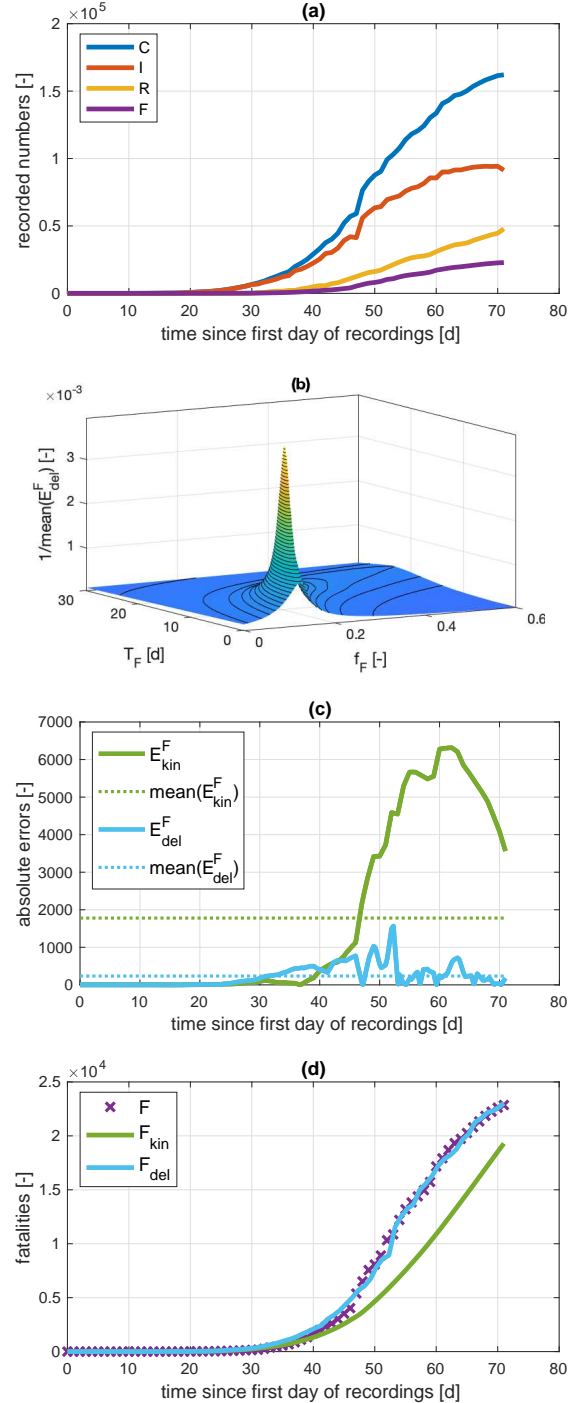

Figure 19: (a) Recorded data, (b) results of optimization based on infection-to-death delay rule, (c) absolute errors based on optimized parameter estimates, and (d) comparison between model-predicted fatalities based on optimized parameter estimates and recorded fatalities for France

Table 20: Data recorded in Germany

| Date   | $C$    | $\Delta C$ | $I$   | $\Delta I$ | $F$  | $\Delta F$ | $R$    | $\Delta R$ |
|--------|--------|------------|-------|------------|------|------------|--------|------------|
| Feb 15 | 16     | 16         | 13    | 13         | 0    | 0          | 3      | 3          |
| Feb 16 | 16     | 0          | 13    | 0          | 0    | 0          | 3      | 0          |
| Feb 17 | 16     | 0          | 9     | -4         | 0    | 0          | 7      | 4          |
| Feb 18 | 16     | 0          | 7     | -2         | 0    | 0          | 9      | 2          |
| Feb 19 | 16     | 0          | 7     | 0          | 0    | 0          | 9      | 0          |
| Feb 20 | 16     | 0          | 3     | -4         | 0    | 0          | 13     | 4          |
| Feb 21 | 16     | 0          | 2     | -1         | 0    | 0          | 14     | 1          |
| Feb 22 | 16     | 0          | 2     | 0          | 0    | 0          | 14     | 0          |
| Feb 23 | 16     | 0          | 2     | 0          | 0    | 0          | 14     | 0          |
| Feb 24 | 16     | 0          | 2     | 0          | 0    | 0          | 14     | 0          |
| Feb 25 | 18     | 2          | 3     | 1          | 0    | 0          | 15     | 1          |
| Feb 26 | 26     | 8          | 11    | 8          | 0    | 0          | 15     | 0          |
| Feb 27 | 48     | 22         | 32    | 21         | 0    | 0          | 16     | 1          |
| Feb 28 | 74     | 26         | 58    | 26         | 0    | 0          | 16     | 0          |
| Feb 29 | 79     | 5          | 63    | 5          | 0    | 0          | 16     | 0          |
| Mar 1  | 130    | 51         | 114   | 51         | 0    | 0          | 16     | 0          |
| Mar 2  | 165    | 35         | 149   | 35         | 0    | 0          | 16     | 0          |
| Mar 3  | 203    | 38         | 187   | 38         | 0    | 0          | 16     | 0          |
| Mar 4  | 262    | 59         | 246   | 59         | 0    | 0          | 16     | 0          |
| Mar 5  | 545    | 283        | 528   | 282        | 0    | 0          | 17     | 1          |
| Mar 6  | 670    | 125        | 652   | 124        | 0    | 0          | 18     | 1          |
| Mar 7  | 800    | 130        | 782   | 130        | 0    | 0          | 18     | 0          |
| Mar 8  | 1040   | 240        | 1022  | 240        | 0    | 0          | 18     | 0          |
| Mar 9  | 1224   | 184        | 1204  | 182        | 2    | 2          | 18     | 0          |
| Mar 10 | 1565   | 341        | 1545  | 341        | 2    | 0          | 18     | 0          |
| Mar 11 | 1966   | 401        | 1938  | 393        | 3    | 1          | 25     | 7          |
| Mar 12 | 2745   | 779        | 2714  | 776        | 6    | 3          | 25     | 0          |
| Mar 13 | 3675   | 930        | 3621  | 907        | 8    | 2          | 46     | 21         |
| Mar 14 | 4599   | 924        | 4544  | 923        | 9    | 1          | 46     | 0          |
| Mar 15 | 5813   | 1214       | 5754  | 1210       | 13   | 4          | 46     | 0          |
| Mar 16 | 7272   | 1459       | 7188  | 1434       | 17   | 4          | 67     | 21         |
| Mar 17 | 9367   | 2095       | 9274  | 2086       | 26   | 9          | 67     | 0          |
| Mar 18 | 12327  | 2960       | 12194 | 2920       | 28   | 2          | 105    | 38         |
| Mar 19 | 15320  | 2993       | 15161 | 2967       | 44   | 16         | 115    | 10         |
| Mar 20 | 19848  | 4528       | 19600 | 4439       | 68   | 24         | 180    | 65         |
| Mar 21 | 22364  | 2516       | 22071 | 2471       | 84   | 16         | 209    | 29         |
| Mar 22 | 24873  | 2509       | 24513 | 2442       | 94   | 10         | 266    | 57         |
| Mar 23 | 29056  | 4183       | 28480 | 3967       | 123  | 29         | 453    | 187        |
| Mar 24 | 32991  | 3935       | 29542 | 1062       | 159  | 36         | 3290   | 2837       |
| Mar 25 | 37323  | 4332       | 33570 | 4028       | 206  | 47         | 3547   | 257        |
| Mar 26 | 43938  | 6615       | 37998 | 4428       | 267  | 61         | 5673   | 2126       |
| Mar 27 | 50871  | 6933       | 43862 | 5864       | 351  | 84         | 6658   | 985        |
| Mar 28 | 57695  | 6824       | 48781 | 4919       | 433  | 82         | 8481   | 1823       |
| Mar 29 | 62435  | 4740       | 52683 | 3902       | 541  | 108        | 9211   | 730        |
| Mar 30 | 66885  | 4450       | 52740 | 57         | 645  | 104        | 13500  | 4289       |
| Mar 31 | 71808  | 4923       | 54933 | 2193       | 775  | 130        | 16100  | 2600       |
| Apr 1  | 77981  | 6173       | 58350 | 3417       | 931  | 156        | 18700  | 2600       |
| Apr 2  | 84794  | 6813       | 61247 | 2897       | 1107 | 176        | 22440  | 3740       |
| Apr 3  | 91159  | 6365       | 65309 | 4062       | 1275 | 168        | 24575  | 2135       |
| Apr 4  | 96092  | 4933       | 68248 | 2939       | 1444 | 169        | 26400  | 1825       |
| Apr 5  | 100123 | 4031       | 69839 | 1591       | 1584 | 140        | 28700  | 2300       |
| Apr 6  | 103375 | 3252       | 72865 | 3026       | 1810 | 226        | 28700  | 0          |
| Apr 7  | 107663 | 4288       | 69566 | -3299      | 2016 | 206        | 36081  | 7381       |
| Apr 8  | 113296 | 5633       | 64647 | -4919      | 2349 | 333        | 46300  | 10219      |
| Apr 9  | 118235 | 4939       | 63221 | -1426      | 2607 | 258        | 52407  | 6107       |
| Apr 10 | 122171 | 3936       | 65522 | 2301       | 2736 | 129        | 53913  | 1506       |
| Apr 11 | 125452 | 3281       | 65181 | -341       | 2871 | 135        | 57400  | 3487       |
| Apr 12 | 127854 | 2402       | 64532 | -649       | 3022 | 151        | 60300  | 2900       |
| Apr 13 | 130072 | 2218       | 62578 | -1954      | 3194 | 172        | 64300  | 4000       |
| Apr 14 | 132210 | 2138       | 60515 | -2063      | 3495 | 301        | 68200  | 3900       |
| Apr 15 | 134753 | 2543       | 58349 | -2166      | 3804 | 309        | 72600  | 4400       |
| Apr 16 | 137698 | 2945       | 56646 | -1703      | 4052 | 248        | 77000  | 4400       |
| Apr 17 | 141397 | 3699       | 53931 | -2715      | 4352 | 300        | 83114  | 6114       |
| Apr 18 | 143724 | 2327       | 53786 | -145       | 4538 | 186        | 85400  | 2286       |
| Apr 19 | 145742 | 2018       | 53100 | -686       | 4642 | 104        | 88000  | 2600       |
| Apr 20 | 147065 | 1323       | 50703 | -2397      | 4862 | 220        | 91500  | 3500       |
| Apr 21 | 148453 | 1388       | 48167 | -2536      | 5086 | 224        | 95200  | 3700       |
| Apr 22 | 150648 | 2195       | 45933 | -2234      | 5315 | 229        | 99400  | 4200       |
| Apr 23 | 153129 | 2481       | 44254 | -1679      | 5575 | 260        | 103300 | 3900       |
| Apr 24 | 154999 | 1870       | 42439 | -1815      | 5760 | 185        | 106800 | 3500       |
| Apr 25 | 156513 | 1514       | 40836 | -1603      | 5877 | 117        | 109800 | 3000       |
| Apr 26 | 157770 | 1257       | 39794 | -1042      | 5976 | 99         | 112000 | 2200       |

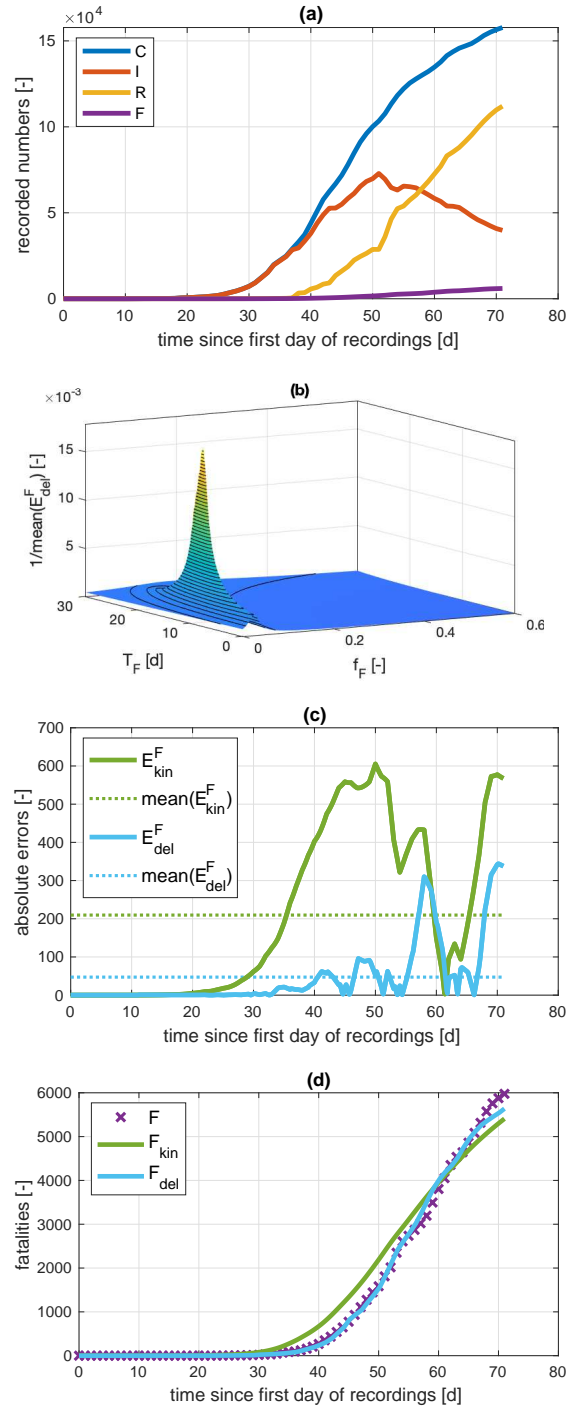

Figure 20: (a) Recorded data, (b) results of optimization based on infection-to-death delay rule, (c) absolute errors based on optimized parameter estimates, and (d) comparison between model-predicted fatalities based on optimized parameter estimates and recorded fatalities for Germany



Table 21: Data recorded in Greece

| Date   | C    | $\Delta C$ | I    | $\Delta I$ | F   | $\Delta F$ | R   | $\Delta R$ |
|--------|------|------------|------|------------|-----|------------|-----|------------|
| Feb 26 | 1    | 1          | 1    | 1          | 0   | 0          | 0   | 0          |
| Feb 27 | 3    | 2          | 3    | 2          | 0   | 0          | 0   | 0          |
| Feb 28 | 4    | 1          | 4    | 1          | 0   | 0          | 0   | 0          |
| Feb 29 | 7    | 3          | 7    | 3          | 0   | 0          | 0   | 0          |
| Mar 1  | 7    | 0          | 7    | 0          | 0   | 0          | 0   | 0          |
| Mar 2  | 7    | 0          | 7    | 0          | 0   | 0          | 0   | 0          |
| Mar 3  | 7    | 0          | 7    | 0          | 0   | 0          | 0   | 0          |
| Mar 4  | 9    | 2          | 9    | 2          | 0   | 0          | 0   | 0          |
| Mar 5  | 31   | 22         | 31   | 22         | 0   | 0          | 0   | 0          |
| Mar 6  | 45   | 14         | 45   | 14         | 0   | 0          | 0   | 0          |
| Mar 7  | 66   | 21         | 66   | 21         | 0   | 0          | 0   | 0          |
| Mar 8  | 73   | 7          | 73   | 7          | 0   | 0          | 0   | 0          |
| Mar 9  | 84   | 11         | 84   | 11         | 0   | 0          | 0   | 0          |
| Mar 10 | 89   | 5          | 89   | 5          | 0   | 0          | 0   | 0          |
| Mar 11 | 99   | 10         | 99   | 10         | 0   | 0          | 0   | 0          |
| Mar 12 | 117  | 18         | 116  | 17         | 1   | 1          | 0   | 0          |
| Mar 13 | 190  | 73         | 187  | 71         | 1   | 0          | 2   | 2          |
| Mar 14 | 228  | 38         | 217  | 30         | 3   | 2          | 8   | 6          |
| Mar 15 | 331  | 103        | 319  | 102        | 4   | 1          | 8   | 0          |
| Mar 16 | 352  | 21         | 340  | 21         | 4   | 0          | 8   | 0          |
| Mar 17 | 387  | 35         | 368  | 28         | 5   | 1          | 14  | 6          |
| Mar 18 | 418  | 31         | 399  | 31         | 5   | 0          | 14  | 0          |
| Mar 19 | 464  | 46         | 439  | 40         | 6   | 1          | 19  | 5          |
| Mar 20 | 495  | 31         | 466  | 27         | 10  | 4          | 19  | 0          |
| Mar 21 | 530  | 35         | 498  | 32         | 13  | 3          | 19  | 0          |
| Mar 22 | 624  | 94         | 590  | 92         | 15  | 2          | 19  | 0          |
| Mar 23 | 695  | 71         | 649  | 59         | 17  | 2          | 29  | 10         |
| Mar 24 | 743  | 48         | 694  | 45         | 20  | 3          | 29  | 0          |
| Mar 25 | 821  | 78         | 763  | 69         | 22  | 2          | 36  | 7          |
| Mar 26 | 892  | 71         | 829  | 66         | 27  | 5          | 36  | 0          |
| Mar 27 | 966  | 74         | 886  | 57         | 28  | 1          | 52  | 16         |
| Mar 28 | 1061 | 95         | 977  | 91         | 32  | 4          | 52  | 0          |
| Mar 29 | 1156 | 95         | 1065 | 88         | 39  | 7          | 52  | 0          |
| Mar 30 | 1212 | 56         | 1114 | 49         | 46  | 7          | 52  | 0          |
| Mar 31 | 1314 | 102        | 1213 | 99         | 49  | 3          | 52  | 0          |
| Apr 1  | 1415 | 101        | 1312 | 99         | 51  | 2          | 52  | 0          |
| Apr 2  | 1544 | 129        | 1430 | 118        | 53  | 2          | 61  | 9          |
| Apr 3  | 1613 | 69         | 1472 | 42         | 63  | 10         | 78  | 17         |
| Apr 4  | 1673 | 60         | 1527 | 55         | 68  | 5          | 78  | 0          |
| Apr 5  | 1735 | 62         | 1584 | 57         | 73  | 5          | 78  | 0          |
| Apr 6  | 1755 | 20         | 1407 | -177       | 79  | 6          | 269 | 191        |
| Apr 7  | 1832 | 77         | 1482 | 75         | 81  | 2          | 269 | 0          |
| Apr 8  | 1884 | 52         | 1532 | 50         | 83  | 2          | 269 | 0          |
| Apr 9  | 1955 | 71         | 1599 | 67         | 87  | 4          | 269 | 0          |
| Apr 10 | 2011 | 56         | 1650 | 51         | 92  | 5          | 269 | 0          |
| Apr 11 | 2081 | 70         | 1719 | 69         | 93  | 1          | 269 | 0          |
| Apr 12 | 2114 | 33         | 1747 | 28         | 98  | 5          | 269 | 0          |
| Apr 13 | 2145 | 31         | 1777 | 30         | 99  | 1          | 269 | 0          |
| Apr 14 | 2170 | 25         | 1800 | 23         | 101 | 2          | 269 | 0          |
| Apr 15 | 2192 | 22         | 1821 | 21         | 102 | 1          | 269 | 0          |
| Apr 16 | 2207 | 15         | 1833 | 12         | 105 | 3          | 269 | 0          |
| Apr 17 | 2224 | 17         | 1847 | 14         | 108 | 3          | 269 | 0          |
| Apr 18 | 2235 | 11         | 1856 | 9          | 110 | 2          | 269 | 0          |
| Apr 19 | 2235 | 0          | 1853 | -3         | 113 | 3          | 269 | 0          |
| Apr 20 | 2245 | 10         | 1860 | 7          | 116 | 3          | 269 | 0          |
| Apr 21 | 2401 | 156        | 1703 | -157       | 121 | 5          | 577 | 308        |
| Apr 22 | 2408 | 7          | 1710 | 7          | 121 | 0          | 577 | 0          |
| Apr 23 | 2463 | 55         | 1761 | 51         | 125 | 4          | 577 | 0          |
| Apr 24 | 2490 | 27         | 1783 | 22         | 130 | 5          | 577 | 0          |
| Apr 25 | 2506 | 16         | 1799 | 16         | 130 | 0          | 577 | 0          |
| Apr 26 | 2517 | 11         | 1806 | 7          | 134 | 4          | 577 | 0          |

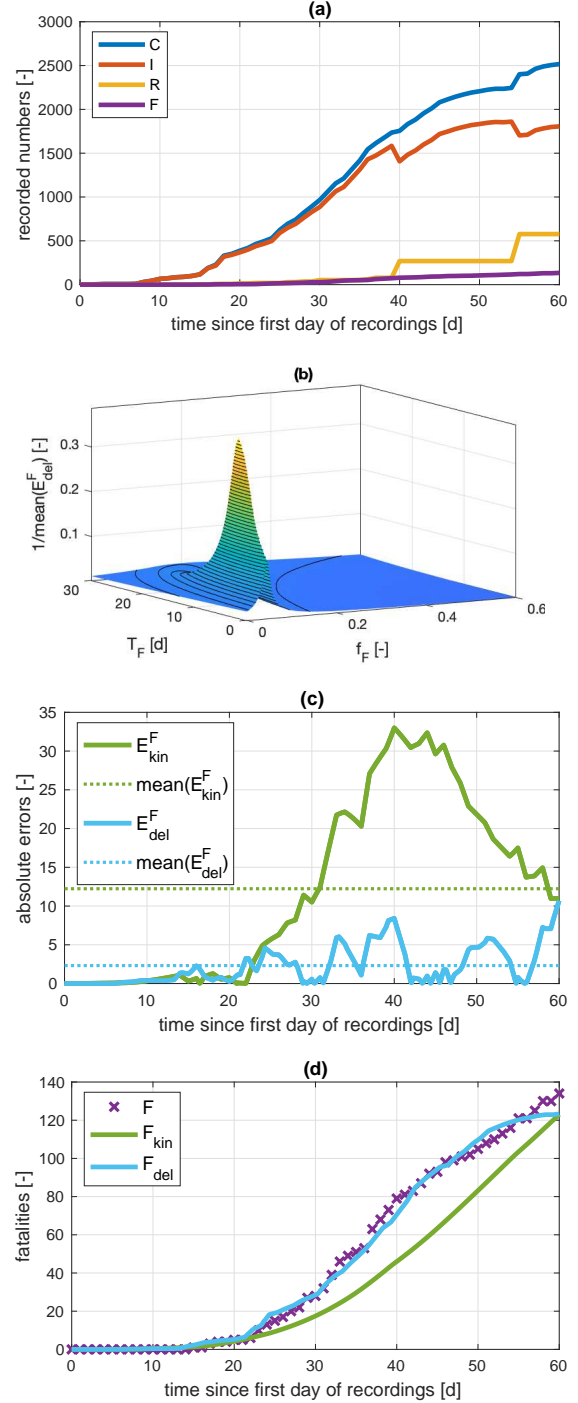

Figure 21: (a) Recorded data, (b) results of optimization based on infection-to-death delay rule, (c) absolute errors based on optimized parameter estimates, and (d) comparison between model-predicted fatalities based on optimized parameter estimates and recorded fatalities for Greece



Table 22: Data recorded in Hungary

| Date   | $C$  | $\Delta C$ | $I$  | $\Delta I$ | $F$ | $\Delta F$ | $R$ | $\Delta R$ |
|--------|------|------------|------|------------|-----|------------|-----|------------|
| Mar 4  | 2    | 2          | 2    | 2          | 0   | 0          | 0   | 0          |
| Mar 5  | 4    | 2          | 4    | 2          | 0   | 0          | 0   | 0          |
| Mar 6  | 4    | 0          | 4    | 0          | 0   | 0          | 0   | 0          |
| Mar 7  | 5    | 1          | 5    | 1          | 0   | 0          | 0   | 0          |
| Mar 8  | 7    | 2          | 7    | 2          | 0   | 0          | 0   | 0          |
| Mar 9  | 9    | 2          | 9    | 2          | 0   | 0          | 0   | 0          |
| Mar 10 | 12   | 3          | 12   | 3          | 0   | 0          | 0   | 0          |
| Mar 11 | 13   | 1          | 13   | 1          | 0   | 0          | 0   | 0          |
| Mar 12 | 16   | 3          | 16   | 3          | 0   | 0          | 0   | 0          |
| Mar 13 | 19   | 3          | 18   | 2          | 0   | 0          | 1   | 1          |
| Mar 14 | 30   | 11         | 29   | 11         | 0   | 0          | 1   | 0          |
| Mar 15 | 32   | 2          | 30   | 1          | 1   | 1          | 1   | 0          |
| Mar 16 | 39   | 7          | 36   | 6          | 1   | 0          | 2   | 1          |
| Mar 17 | 50   | 11         | 47   | 11         | 1   | 0          | 2   | 0          |
| Mar 18 | 58   | 8          | 55   | 8          | 1   | 0          | 2   | 0          |
| Mar 19 | 73   | 15         | 70   | 15         | 1   | 0          | 2   | 0          |
| Mar 20 | 85   | 12         | 74   | 4          | 4   | 3          | 7   | 5          |
| Mar 21 | 103  | 18         | 92   | 18         | 4   | 0          | 7   | 0          |
| Mar 22 | 131  | 28         | 109  | 17         | 6   | 2          | 16  | 9          |
| Mar 23 | 167  | 36         | 138  | 29         | 8   | 2          | 21  | 5          |
| Mar 24 | 187  | 20         | 157  | 19         | 9   | 1          | 21  | 0          |
| Mar 25 | 226  | 39         | 195  | 38         | 10  | 1          | 21  | 0          |
| Mar 26 | 261  | 35         | 223  | 28         | 10  | 0          | 28  | 7          |
| Mar 27 | 300  | 39         | 256  | 33         | 10  | 0          | 34  | 6          |
| Mar 28 | 343  | 43         | 298  | 42         | 11  | 1          | 34  | 0          |
| Mar 29 | 408  | 65         | 361  | 63         | 13  | 2          | 34  | 0          |
| Mar 30 | 447  | 39         | 398  | 37         | 15  | 2          | 34  | 0          |
| Mar 31 | 492  | 45         | 439  | 41         | 16  | 1          | 37  | 3          |
| Apr 1  | 525  | 33         | 465  | 26         | 20  | 4          | 40  | 3          |
| Apr 2  | 585  | 60         | 522  | 57         | 21  | 1          | 42  | 2          |
| Apr 3  | 623  | 38         | 554  | 32         | 26  | 5          | 43  | 1          |
| Apr 4  | 678  | 55         | 588  | 34         | 32  | 6          | 58  | 15         |
| Apr 5  | 733  | 55         | 633  | 45         | 34  | 2          | 66  | 8          |
| Apr 6  | 744  | 11         | 639  | 6          | 38  | 4          | 67  | 1          |
| Apr 7  | 817  | 73         | 699  | 60         | 47  | 9          | 71  | 4          |
| Apr 8  | 895  | 78         | 743  | 44         | 58  | 11         | 94  | 23         |
| Apr 9  | 980  | 85         | 818  | 75         | 66  | 8          | 96  | 2          |
| Apr 10 | 1190 | 210        | 1001 | 183        | 77  | 11         | 112 | 16         |
| Apr 11 | 1310 | 120        | 1110 | 109        | 85  | 8          | 115 | 3          |
| Apr 12 | 1410 | 100        | 1193 | 83         | 99  | 14         | 118 | 3          |
| Apr 13 | 1458 | 48         | 1229 | 36         | 109 | 10         | 120 | 2          |
| Apr 14 | 1512 | 54         | 1268 | 39         | 122 | 13         | 122 | 2          |
| Apr 15 | 1579 | 67         | 1253 | -15        | 134 | 12         | 192 | 70         |
| Apr 16 | 1652 | 73         | 1311 | 58         | 142 | 8          | 199 | 7          |
| Apr 17 | 1763 | 111        | 1400 | 89         | 156 | 14         | 207 | 8          |
| Apr 18 | 1834 | 71         | 1431 | 31         | 172 | 16         | 231 | 24         |
| Apr 19 | 1916 | 82         | 1477 | 46         | 189 | 17         | 250 | 19         |
| Apr 20 | 1984 | 68         | 1518 | 41         | 199 | 10         | 267 | 17         |
| Apr 21 | 2098 | 114        | 1598 | 80         | 213 | 14         | 287 | 20         |
| Apr 22 | 2168 | 70         | 1648 | 50         | 225 | 12         | 295 | 8          |
| Apr 23 | 2284 | 116        | 1655 | 7          | 239 | 14         | 390 | 95         |
| Apr 24 | 2383 | 99         | 1732 | 77         | 250 | 11         | 401 | 11         |
| Apr 25 | 2443 | 60         | 1723 | -9         | 262 | 12         | 458 | 57         |
| Apr 26 | 2500 | 57         | 1743 | 20         | 272 | 10         | 485 | 27         |

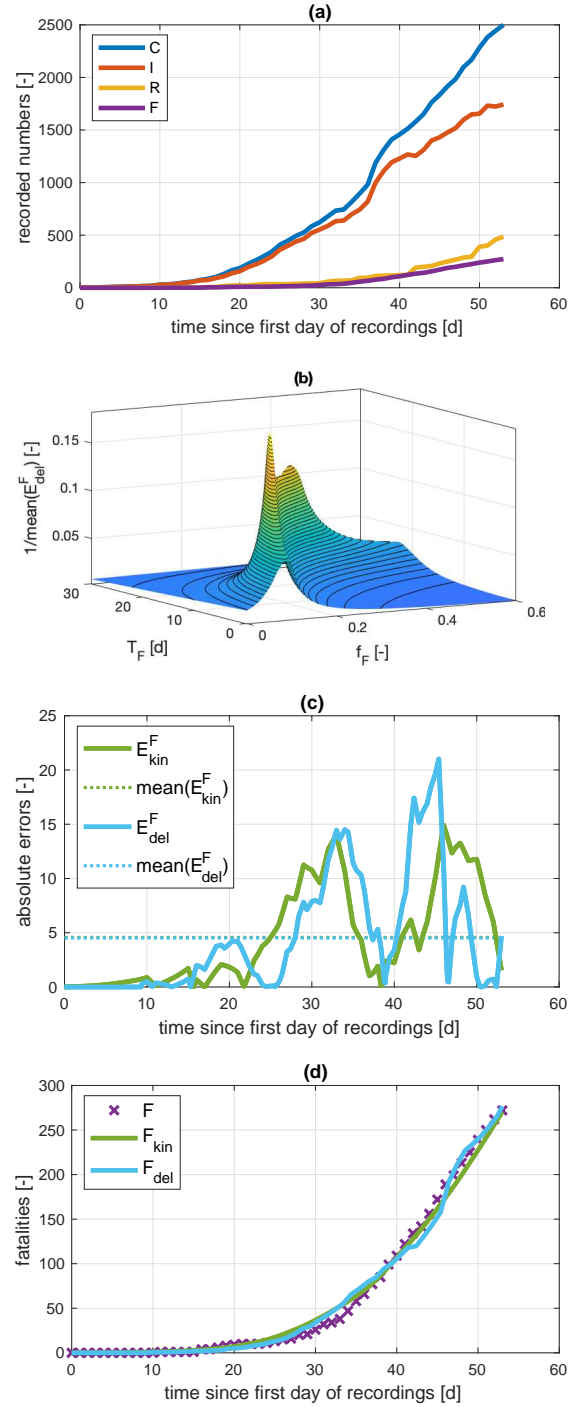

Figure 22: (a) Recorded data, (b) results of optimization based on infection-to-death delay rule, (c) absolute errors based on optimized parameter estimates, and (d) comparison between model-predicted fatalities based on optimized parameter estimates and recorded fatalities for Hungary

Table 23: Data recorded in Iceland

| Date   | $C$  | $\Delta C$ | $I$  | $\Delta I$ | $F$ | $\Delta F$ | $R$  | $\Delta R$ |
|--------|------|------------|------|------------|-----|------------|------|------------|
| Feb 28 | 1    | 1          | 1    | 1          | 0   | 0          | 0    | 0          |
| Feb 29 | 1    | 0          | 1    | 0          | 0   | 0          | 0    | 0          |
| Mar 1  | 3    | 2          | 3    | 2          | 0   | 0          | 0    | 0          |
| Mar 2  | 9    | 6          | 9    | 6          | 0   | 0          | 0    | 0          |
| Mar 3  | 14   | 5          | 13   | 4          | 0   | 0          | 1    | 1          |
| Mar 4  | 26   | 12         | 25   | 12         | 0   | 0          | 1    | 0          |
| Mar 5  | 37   | 11         | 37   | 12         | 0   | 0          | 0    | -1         |
| Mar 6  | 45   | 8          | 44   | 7          | 0   | 0          | 1    | 1          |
| Mar 7  | 50   | 5          | 49   | 5          | 0   | 0          | 1    | 0          |
| Mar 8  | 58   | 8          | 57   | 8          | 0   | 0          | 1    | 0          |
| Mar 9  | 65   | 7          | 64   | 7          | 0   | 0          | 1    | 0          |
| Mar 10 | 81   | 16         | 80   | 16         | 0   | 0          | 1    | 0          |
| Mar 11 | 85   | 4          | 85   | 5          | 0   | 0          | 0    | -1         |
| Mar 12 | 117  | 32         | 117  | 32         | 0   | 0          | 0    | 0          |
| Mar 13 | 134  | 17         | 134  | 17         | 0   | 0          | 0    | 0          |
| Mar 14 | 161  | 27         | 161  | 27         | 0   | 0          | 0    | 0          |
| Mar 15 | 180  | 19         | 180  | 19         | 0   | 0          | 0    | 0          |
| Mar 16 | 199  | 19         | 199  | 19         | 0   | 0          | 0    | 0          |
| Mar 17 | 247  | 48         | 242  | 43         | 0   | 0          | 5    | 5          |
| Mar 18 | 250  | 3          | 245  | 3          | 0   | 0          | 5    | 0          |
| Mar 19 | 330  | 80         | 325  | 80         | 0   | 0          | 5    | 0          |
| Mar 20 | 409  | 79         | 404  | 79         | 0   | 0          | 5    | 0          |
| Mar 21 | 473  | 64         | 467  | 63         | 1   | 1          | 5    | 0          |
| Mar 22 | 568  | 95         | 562  | 95         | 1   | 0          | 5    | 0          |
| Mar 23 | 588  | 20         | 536  | -26        | 1   | 0          | 51   | 46         |
| Mar 24 | 648  | 60         | 595  | 59         | 2   | 1          | 51   | 0          |
| Mar 25 | 737  | 89         | 679  | 84         | 2   | 0          | 56   | 5          |
| Mar 26 | 802  | 65         | 718  | 39         | 2   | 0          | 82   | 26         |
| Mar 27 | 890  | 88         | 791  | 73         | 2   | 0          | 97   | 15         |
| Mar 28 | 963  | 73         | 847  | 56         | 2   | 0          | 114  | 17         |
| Mar 29 | 1020 | 57         | 883  | 36         | 2   | 0          | 135  | 21         |
| Mar 30 | 1086 | 66         | 927  | 44         | 2   | 0          | 157  | 22         |
| Mar 31 | 1135 | 49         | 935  | 8          | 2   | 0          | 198  | 41         |
| Apr 1  | 1220 | 85         | 982  | 47         | 2   | 0          | 236  | 38         |
| Apr 2  | 1319 | 99         | 1031 | 49         | 4   | 2          | 284  | 48         |
| Apr 3  | 1364 | 45         | 1051 | 20         | 4   | 0          | 309  | 25         |
| Apr 4  | 1417 | 53         | 1017 | -34        | 4   | 0          | 396  | 87         |
| Apr 5  | 1486 | 69         | 1054 | 37         | 4   | 0          | 428  | 32         |
| Apr 6  | 1562 | 76         | 1096 | 42         | 6   | 2          | 460  | 32         |
| Apr 7  | 1586 | 24         | 1021 | -75        | 6   | 0          | 559  | 99         |
| Apr 8  | 1616 | 30         | 977  | -44        | 6   | 0          | 633  | 74         |
| Apr 9  | 1648 | 32         | 954  | -23        | 6   | 0          | 688  | 55         |
| Apr 10 | 1675 | 27         | 917  | -37        | 7   | 1          | 751  | 63         |
| Apr 11 | 1689 | 14         | 840  | -77        | 8   | 1          | 841  | 90         |
| Apr 12 | 1701 | 12         | 804  | -36        | 8   | 0          | 889  | 48         |
| Apr 13 | 1711 | 10         | 770  | -34        | 8   | 0          | 933  | 44         |
| Apr 14 | 1720 | 9          | 723  | -47        | 8   | 0          | 989  | 56         |
| Apr 15 | 1727 | 7          | 642  | -81        | 8   | 0          | 1077 | 88         |
| Apr 16 | 1739 | 12         | 587  | -55        | 8   | 0          | 1144 | 67         |
| Apr 17 | 1754 | 15         | 521  | -66        | 9   | 1          | 1224 | 80         |
| Apr 18 | 1760 | 6          | 460  | -61        | 9   | 0          | 1291 | 67         |
| Apr 19 | 1771 | 11         | 471  | 11         | 9   | 0          | 1291 | 0          |
| Apr 20 | 1773 | 2          | 401  | -70        | 10  | 1          | 1362 | 71         |
| Apr 21 | 1778 | 5          | 351  | -50        | 10  | 0          | 1417 | 55         |
| Apr 22 | 1785 | 7          | 313  | -38        | 10  | 0          | 1462 | 45         |
| Apr 23 | 1789 | 4          | 270  | -43        | 10  | 0          | 1509 | 47         |
| Apr 24 | 1789 | 0          | 237  | -33        | 10  | 0          | 1542 | 33         |
| Apr 25 | 1790 | 1          | 210  | -27        | 10  | 0          | 1570 | 28         |
| Apr 26 | 1792 | 2          | 174  | -36        | 10  | 0          | 1608 | 38         |

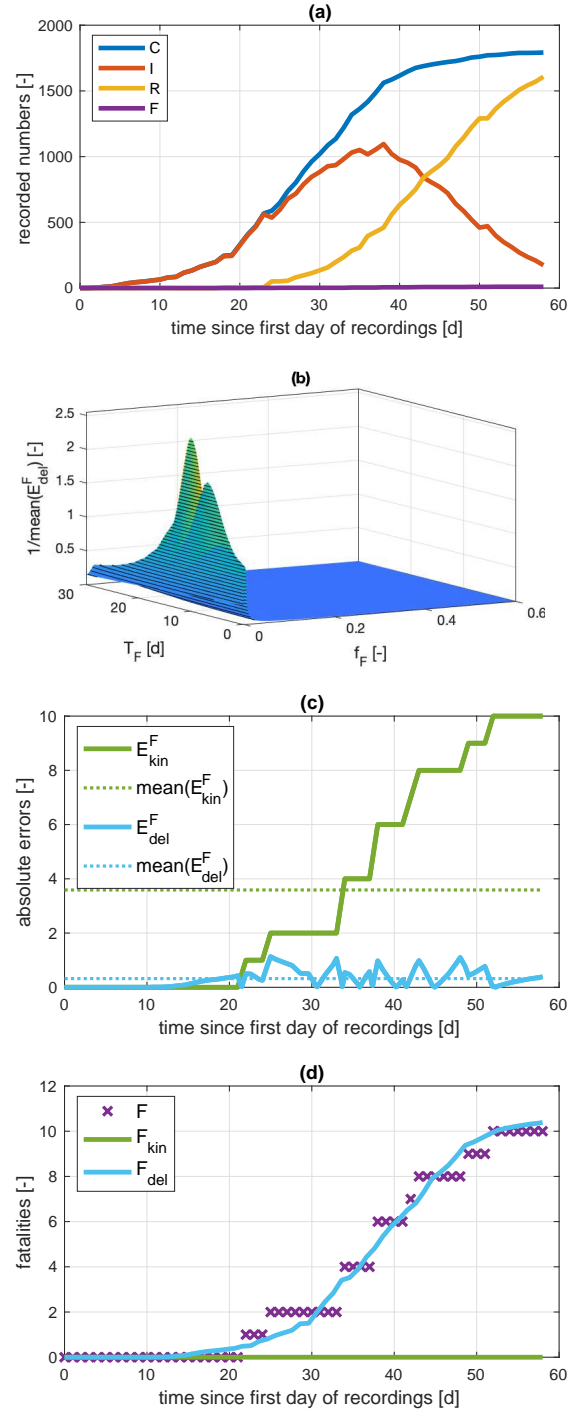

Figure 23: (a) Recorded data, (b) results of optimization based on infection-to-death delay rule, (c) absolute errors based on optimized parameter estimates, and (d) comparison between model-predicted fatalities based on optimized parameter estimates and recorded fatalities for Iceland

Table 24: Data recorded in India

| Date   | C     | $\Delta C$ | I     | $\Delta I$ | F   | $\Delta F$ | R    | $\Delta R$ |
|--------|-------|------------|-------|------------|-----|------------|------|------------|
| Feb 15 | 3     | 3          | 0     | 0          | 0   | 0          | 3    | 3          |
| Feb 16 | 3     | 0          | 0     | 0          | 0   | 0          | 3    | 0          |
| Feb 17 | 3     | 0          | 0     | 0          | 0   | 0          | 3    | 0          |
| Feb 18 | 3     | 0          | 0     | 0          | 0   | 0          | 3    | 0          |
| Feb 19 | 3     | 0          | 0     | 0          | 0   | 0          | 3    | 0          |
| Feb 20 | 3     | 0          | 0     | 0          | 0   | 0          | 3    | 0          |
| Feb 21 | 3     | 0          | 0     | 0          | 0   | 0          | 3    | 0          |
| Feb 22 | 3     | 0          | 0     | 0          | 0   | 0          | 3    | 0          |
| Feb 23 | 3     | 0          | 0     | 0          | 0   | 0          | 3    | 0          |
| Feb 24 | 3     | 0          | 0     | 0          | 0   | 0          | 3    | 0          |
| Feb 25 | 3     | 0          | 0     | 0          | 0   | 0          | 3    | 0          |
| Feb 26 | 3     | 0          | 0     | 0          | 0   | 0          | 3    | 0          |
| Feb 27 | 3     | 0          | 0     | 0          | 0   | 0          | 3    | 0          |
| Feb 28 | 3     | 0          | 0     | 0          | 0   | 0          | 3    | 0          |
| Feb 29 | 3     | 0          | 0     | 0          | 0   | 0          | 3    | 0          |
| Mar 1  | 3     | 0          | 0     | 0          | 0   | 0          | 3    | 0          |
| Mar 2  | 6     | 3          | 3     | 3          | 0   | 0          | 3    | 0          |
| Mar 3  | 7     | 1          | 4     | 1          | 0   | 0          | 3    | 0          |
| Mar 4  | 29    | 22         | 26    | 22         | 0   | 0          | 3    | 0          |
| Mar 5  | 30    | 1          | 27    | 1          | 0   | 0          | 3    | 0          |
| Mar 6  | 31    | 1          | 28    | 1          | 0   | 0          | 3    | 0          |
| Mar 7  | 34    | 3          | 31    | 3          | 0   | 0          | 3    | 0          |
| Mar 8  | 40    | 6          | 37    | 6          | 0   | 0          | 3    | 0          |
| Mar 9  | 47    | 7          | 43    | 6          | 0   | 0          | 4    | 1          |
| Mar 10 | 62    | 15         | 58    | 15         | 0   | 0          | 4    | 0          |
| Mar 11 | 62    | 0          | 58    | 0          | 0   | 0          | 4    | 0          |
| Mar 12 | 74    | 12         | 69    | 11         | 1   | 1          | 4    | 0          |
| Mar 13 | 82    | 8          | 70    | 1          | 2   | 1          | 10   | 6          |
| Mar 14 | 100   | 18         | 88    | 18         | 2   | 0          | 10   | 0          |
| Mar 15 | 114   | 14         | 99    | 11         | 2   | 0          | 13   | 3          |
| Mar 16 | 129   | 15         | 114   | 15         | 2   | 0          | 13   | 0          |
| Mar 17 | 143   | 14         | 126   | 12         | 3   | 1          | 14   | 1          |
| Mar 18 | 169   | 26         | 152   | 26         | 3   | 0          | 14   | 0          |
| Mar 19 | 194   | 25         | 170   | 18         | 4   | 1          | 20   | 6          |
| Mar 20 | 249   | 55         | 221   | 51         | 5   | 1          | 23   | 3          |
| Mar 21 | 332   | 83         | 304   | 83         | 5   | 0          | 23   | 0          |
| Mar 22 | 396   | 64         | 365   | 61         | 7   | 2          | 24   | 1          |
| Mar 23 | 499   | 103        | 455   | 90         | 10  | 3          | 34   | 10         |
| Mar 24 | 536   | 37         | 486   | 31         | 10  | 0          | 40   | 6          |
| Mar 25 | 657   | 121        | 602   | 116        | 12  | 2          | 43   | 3          |
| Mar 26 | 727   | 70         | 662   | 60         | 20  | 8          | 45   | 2          |
| Mar 27 | 887   | 160        | 794   | 132        | 20  | 0          | 73   | 28         |
| Mar 28 | 987   | 100        | 879   | 85         | 24  | 4          | 84   | 11         |
| Mar 29 | 1024  | 37         | 902   | 23         | 27  | 3          | 95   | 11         |
| Mar 30 | 1251  | 227        | 1117  | 215        | 32  | 5          | 102  | 7          |
| Mar 31 | 1397  | 146        | 1239  | 122        | 35  | 3          | 123  | 21         |
| Apr 1  | 1998  | 601        | 1792  | 553        | 58  | 23         | 148  | 25         |
| Apr 2  | 2543  | 545        | 2280  | 488        | 72  | 14         | 191  | 43         |
| Apr 3  | 3059  | 516        | 2781  | 501        | 86  | 14         | 192  | 1          |
| Apr 4  | 3588  | 529        | 3260  | 479        | 99  | 13         | 229  | 37         |
| Apr 5  | 4289  | 701        | 3843  | 583        | 118 | 19         | 328  | 99         |
| Apr 6  | 4778  | 489        | 4267  | 424        | 136 | 18         | 375  | 47         |
| Apr 7  | 5351  | 573        | 4723  | 456        | 160 | 24         | 468  | 93         |
| Apr 8  | 5916  | 565        | 5232  | 509        | 178 | 18         | 506  | 38         |
| Apr 9  | 6725  | 809        | 5863  | 631        | 227 | 49         | 635  | 129        |
| Apr 10 | 7600  | 875        | 6577  | 714        | 249 | 22         | 774  | 139        |
| Apr 11 | 8446  | 846        | 7189  | 612        | 288 | 39         | 969  | 195        |
| Apr 12 | 9205  | 759        | 7794  | 605        | 331 | 43         | 1080 | 111        |
| Apr 13 | 10453 | 1248       | 8914  | 1120       | 358 | 27         | 1181 | 101        |
| Apr 14 | 11487 | 1034       | 9735  | 821        | 393 | 35         | 1359 | 178        |
| Apr 15 | 12370 | 883        | 10440 | 705        | 422 | 29         | 1508 | 149        |
| Apr 16 | 13430 | 1060       | 11214 | 774        | 448 | 26         | 1768 | 260        |
| Apr 17 | 14352 | 922        | 11825 | 611        | 486 | 38         | 2041 | 273        |
| Apr 18 | 16365 | 2013       | 13381 | 1556       | 521 | 35         | 2463 | 422        |
| Apr 19 | 17615 | 1250       | 14202 | 821        | 559 | 38         | 2854 | 391        |
| Apr 20 | 18539 | 924        | 14674 | 472        | 592 | 33         | 3273 | 419        |
| Apr 21 | 20080 | 1541       | 15460 | 786        | 645 | 53         | 3975 | 702        |
| Apr 22 | 21370 | 1290       | 16319 | 859        | 681 | 36         | 4370 | 395        |
| Apr 23 | 23039 | 1669       | 17306 | 987        | 721 | 40         | 5012 | 642        |
| Apr 24 | 24447 | 1408       | 18171 | 865        | 780 | 59         | 5496 | 484        |
| Apr 25 | 26283 | 1836       | 19519 | 1348       | 825 | 45         | 5939 | 443        |
| Apr 26 | 27890 | 1607       | 20486 | 967        | 881 | 56         | 6523 | 584        |

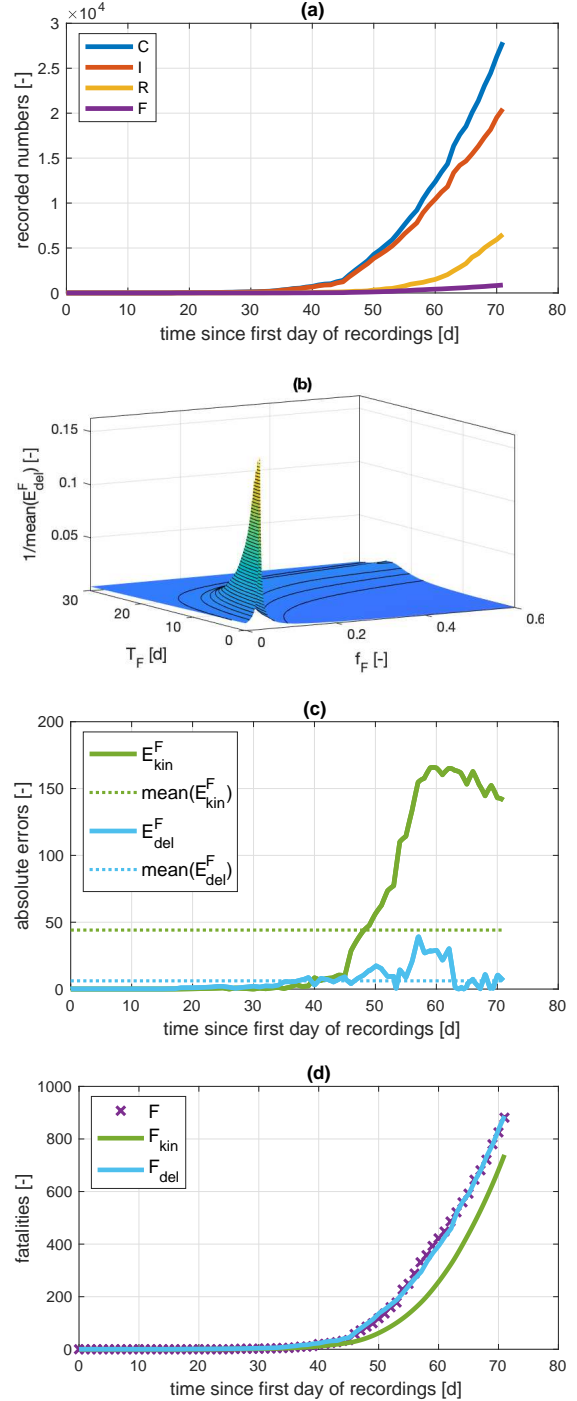

Figure 24: (a) Recorded data, (b) results of optimization based on infection-to-death delay rule, (c) absolute errors based on optimized parameter estimates, and (d) comparison between model-predicted fatalities based on optimized parameter estimates and recorded fatalities for India

Table 25: Data recorded in Indonesia

| Date   | $C$  | $\Delta C$ | $I$  | $\Delta I$ | $F$ | $\Delta F$ | $R$  | $\Delta R$ |
|--------|------|------------|------|------------|-----|------------|------|------------|
| Mar 2  | 2    | 2          | 2    | 2          | 0   | 0          | 0    | 0          |
| Mar 3  | 2    | 0          | 2    | 0          | 0   | 0          | 0    | 0          |
| Mar 4  | 2    | 0          | 2    | 0          | 0   | 0          | 0    | 0          |
| Mar 5  | 2    | 0          | 2    | 0          | 0   | 0          | 0    | 0          |
| Mar 6  | 4    | 2          | 4    | 2          | 0   | 0          | 0    | 0          |
| Mar 7  | 4    | 0          | 4    | 0          | 0   | 0          | 0    | 0          |
| Mar 8  | 6    | 2          | 6    | 2          | 0   | 0          | 0    | 0          |
| Mar 9  | 19   | 13         | 19   | 13         | 0   | 0          | 0    | 0          |
| Mar 10 | 27   | 8          | 25   | 6          | 0   | 0          | 2    | 2          |
| Mar 11 | 34   | 7          | 31   | 6          | 1   | 1          | 2    | 0          |
| Mar 12 | 34   | 0          | 30   | -1         | 1   | 0          | 3    | 1          |
| Mar 13 | 69   | 35         | 60   | 30         | 4   | 3          | 5    | 2          |
| Mar 14 | 96   | 27         | 83   | 23         | 5   | 1          | 8    | 3          |
| Mar 15 | 117  | 21         | 104  | 21         | 5   | 0          | 8    | 0          |
| Mar 16 | 134  | 17         | 121  | 17         | 5   | 0          | 8    | 0          |
| Mar 17 | 172  | 38         | 156  | 35         | 7   | 2          | 9    | 1          |
| Mar 18 | 227  | 55         | 197  | 41         | 19  | 12         | 11   | 2          |
| Mar 19 | 309  | 82         | 269  | 72         | 25  | 6          | 15   | 4          |
| Mar 20 | 369  | 60         | 320  | 51         | 32  | 7          | 17   | 2          |
| Mar 21 | 450  | 81         | 392  | 72         | 38  | 6          | 20   | 3          |
| Mar 22 | 514  | 64         | 437  | 45         | 48  | 10         | 29   | 9          |
| Mar 23 | 579  | 65         | 500  | 63         | 49  | 1          | 30   | 1          |
| Mar 24 | 686  | 107        | 601  | 101        | 55  | 6          | 30   | 0          |
| Mar 25 | 790  | 104        | 701  | 100        | 58  | 3          | 31   | 1          |
| Mar 26 | 893  | 103        | 780  | 79         | 78  | 20         | 35   | 4          |
| Mar 27 | 1046 | 153        | 913  | 133        | 87  | 9          | 46   | 11         |
| Mar 28 | 1155 | 109        | 994  | 81         | 102 | 15         | 59   | 13         |
| Mar 29 | 1285 | 130        | 1107 | 113        | 114 | 12         | 64   | 5          |
| Mar 30 | 1414 | 129        | 1217 | 110        | 122 | 8          | 75   | 11         |
| Mar 31 | 1528 | 114        | 1311 | 94         | 136 | 14         | 81   | 6          |
| Apr 1  | 1677 | 149        | 1417 | 106        | 157 | 21         | 103  | 22         |
| Apr 2  | 1790 | 113        | 1508 | 91         | 170 | 13         | 112  | 9          |
| Apr 3  | 1986 | 196        | 1671 | 163        | 181 | 11         | 134  | 22         |
| Apr 4  | 2092 | 106        | 1751 | 80         | 191 | 10         | 150  | 16         |
| Apr 5  | 2273 | 181        | 1911 | 160        | 198 | 7          | 164  | 14         |
| Apr 6  | 2491 | 218        | 2090 | 179        | 209 | 11         | 192  | 28         |
| Apr 7  | 2738 | 247        | 2313 | 223        | 221 | 12         | 204  | 12         |
| Apr 8  | 2956 | 218        | 2494 | 181        | 240 | 19         | 222  | 18         |
| Apr 9  | 3293 | 337        | 2761 | 267        | 280 | 40         | 252  | 30         |
| Apr 10 | 3512 | 219        | 2924 | 163        | 306 | 26         | 282  | 30         |
| Apr 11 | 3842 | 330        | 3229 | 305        | 327 | 21         | 286  | 4          |
| Apr 12 | 4241 | 399        | 3509 | 280        | 373 | 46         | 359  | 73         |
| Apr 13 | 4557 | 316        | 3778 | 269        | 399 | 26         | 380  | 21         |
| Apr 14 | 4839 | 282        | 3954 | 176        | 459 | 60         | 426  | 46         |
| Apr 15 | 5136 | 297        | 4221 | 267        | 469 | 10         | 446  | 20         |
| Apr 16 | 5516 | 380        | 4472 | 251        | 496 | 27         | 548  | 102        |
| Apr 17 | 5923 | 407        | 4796 | 324        | 520 | 24         | 607  | 59         |
| Apr 18 | 6248 | 325        | 5082 | 286        | 535 | 15         | 631  | 24         |
| Apr 19 | 6575 | 327        | 5307 | 225        | 582 | 47         | 686  | 55         |
| Apr 20 | 6760 | 185        | 5423 | 116        | 590 | 8          | 747  | 61         |
| Apr 21 | 7135 | 375        | 5677 | 254        | 616 | 26         | 842  | 95         |
| Apr 22 | 7418 | 283        | 5870 | 193        | 635 | 19         | 913  | 71         |
| Apr 23 | 7775 | 357        | 6168 | 298        | 647 | 12         | 960  | 47         |
| Apr 24 | 8211 | 436        | 6520 | 352        | 689 | 42         | 1002 | 42         |
| Apr 25 | 8607 | 396        | 6845 | 325        | 720 | 31         | 1042 | 40         |
| Apr 26 | 8882 | 275        | 7032 | 187        | 743 | 23         | 1107 | 65         |

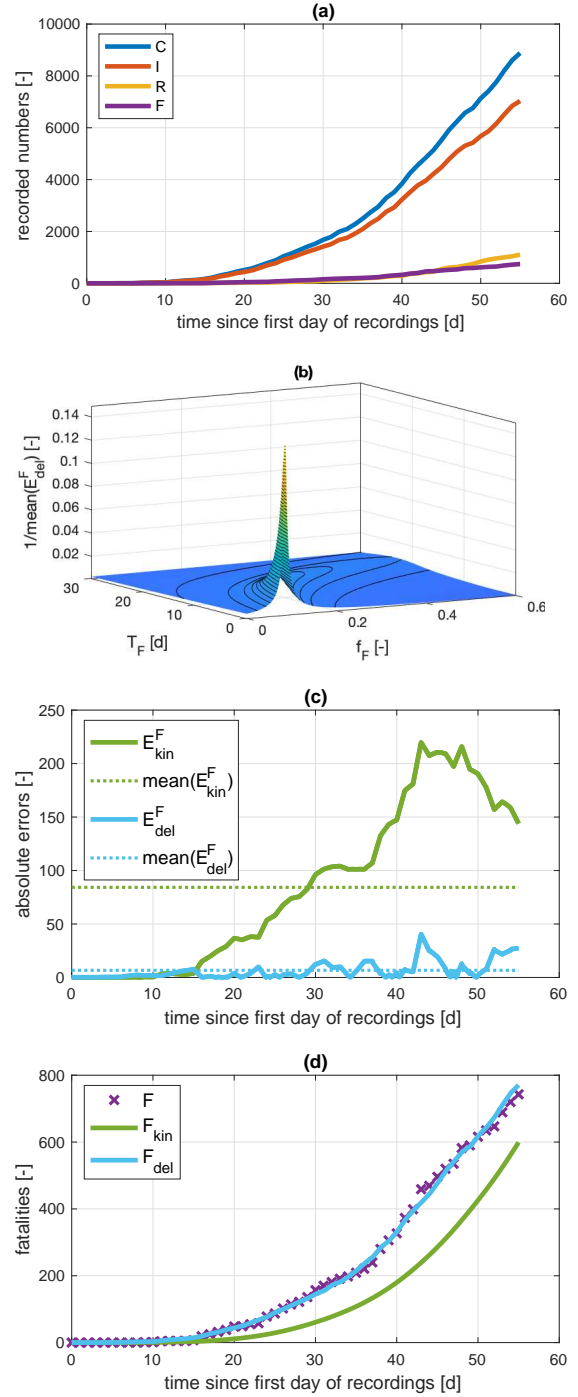

Figure 25: (a) Recorded data, (b) results of optimization based on infection-to-death delay rule, (c) absolute errors based on optimized parameter estimates, and (d) comparison between model-predicted fatalities based on optimized parameter estimates and recorded fatalities for Indonesia

Table 26: Data recorded in Iran

| Date   | $C$   | $\Delta C$ | $I$   | $\Delta I$ | $F$  | $\Delta F$ | $R$   | $\Delta R$ |
|--------|-------|------------|-------|------------|------|------------|-------|------------|
| Feb 19 | 2     | 2          | 0     | 0          | 2    | 2          | 0     | 0          |
| Feb 20 | 5     | 3          | 3     | 3          | 2    | 0          | 0     | 0          |
| Feb 21 | 18    | 13         | 14    | 11         | 4    | 2          | 0     | 0          |
| Feb 22 | 29    | 11         | 23    | 9          | 6    | 2          | 0     | 0          |
| Feb 23 | 43    | 14         | 34    | 11         | 8    | 2          | 1     | 1          |
| Feb 24 | 61    | 18         | 46    | 12         | 12   | 4          | 3     | 2          |
| Feb 25 | 95    | 34         | 54    | 8          | 16   | 4          | 25    | 22         |
| Feb 26 | 139   | 44         | 95    | 41         | 19   | 3          | 25    | 0          |
| Feb 27 | 245   | 106        | 165   | 70         | 26   | 7          | 54    | 29         |
| Feb 28 | 388   | 143        | 281   | 116        | 34   | 8          | 73    | 19         |
| Feb 29 | 593   | 205        | 427   | 146        | 43   | 9          | 123   | 50         |
| Mar 1  | 978   | 385        | 749   | 322        | 54   | 11         | 175   | 52         |
| Mar 2  | 1501  | 523        | 1144  | 395        | 66   | 12         | 291   | 116        |
| Mar 3  | 2336  | 835        | 1824  | 680        | 77   | 11         | 435   | 144        |
| Mar 4  | 2922  | 586        | 2278  | 454        | 92   | 15         | 552   | 117        |
| Mar 5  | 3513  | 591        | 2666  | 388        | 108  | 16         | 739   | 187        |
| Mar 6  | 4747  | 1234       | 3710  | 1044       | 124  | 16         | 913   | 174        |
| Mar 7  | 5823  | 1076       | 4009  | 299        | 145  | 21         | 1669  | 756        |
| Mar 8  | 6566  | 743        | 4238  | 229        | 194  | 49         | 2134  | 465        |
| Mar 9  | 7161  | 595        | 4530  | 292        | 237  | 43         | 2394  | 260        |
| Mar 10 | 8042  | 881        | 5020  | 490        | 291  | 54         | 2731  | 337        |
| Mar 11 | 9000  | 958        | 5687  | 667        | 354  | 63         | 2959  | 228        |
| Mar 12 | 10075 | 1075       | 6370  | 683        | 429  | 75         | 3276  | 317        |
| Mar 13 | 11364 | 1289       | 7321  | 951        | 514  | 85         | 3529  | 253        |
| Mar 14 | 12729 | 1365       | 7779  | 458        | 611  | 97         | 4339  | 810        |
| Mar 15 | 13938 | 1209       | 8624  | 845        | 724  | 113        | 4590  | 251        |
| Mar 16 | 14991 | 1053       | 9142  | 518        | 853  | 129        | 4996  | 406        |
| Mar 17 | 16169 | 1178       | 9792  | 650        | 988  | 135        | 5389  | 393        |
| Mar 18 | 17361 | 1192       | 10516 | 724        | 1135 | 147        | 5710  | 321        |
| Mar 19 | 18407 | 1046       | 11144 | 628        | 1284 | 149        | 5979  | 269        |
| Mar 20 | 19644 | 1237       | 11466 | 322        | 1433 | 149        | 6745  | 766        |
| Mar 21 | 20610 | 966        | 11419 | -47        | 1556 | 123        | 7635  | 890        |
| Mar 22 | 21638 | 1028       | 12040 | 621        | 1685 | 129        | 7913  | 278        |
| Mar 23 | 23049 | 1411       | 12861 | 821        | 1812 | 127        | 8376  | 463        |
| Mar 24 | 24811 | 1762       | 13964 | 1103       | 1934 | 122        | 8913  | 537        |
| Mar 25 | 27017 | 2206       | 15315 | 1351       | 2077 | 143        | 9625  | 712        |
| Mar 26 | 29406 | 2389       | 16715 | 1400       | 2234 | 157        | 10457 | 832        |
| Mar 27 | 32332 | 2926       | 18821 | 2106       | 2378 | 144        | 11133 | 676        |
| Mar 28 | 35408 | 3076       | 21212 | 2391       | 2517 | 139        | 11679 | 546        |
| Mar 29 | 38309 | 2901       | 23278 | 2066       | 2640 | 123        | 12391 | 712        |
| Mar 30 | 41495 | 3186       | 24827 | 1549       | 2757 | 117        | 13911 | 1520       |
| Mar 31 | 44605 | 3110       | 27051 | 2224       | 2898 | 141        | 14656 | 745        |
| Apr 1  | 47593 | 2988       | 29084 | 2033       | 3036 | 138        | 15473 | 817        |
| Apr 2  | 50468 | 2875       | 30597 | 1513       | 3160 | 124        | 16711 | 1238       |
| Apr 3  | 53183 | 2715       | 31954 | 1357       | 3294 | 134        | 17935 | 1224       |
| Apr 4  | 55743 | 2560       | 32555 | 601        | 3452 | 158        | 19736 | 1801       |
| Apr 5  | 58226 | 2483       | 32612 | 57         | 3603 | 151        | 22011 | 2275       |
| Apr 6  | 60500 | 2274       | 32525 | -87        | 3739 | 136        | 24236 | 2225       |
| Apr 7  | 62589 | 2089       | 31678 | -847       | 3872 | 133        | 27039 | 2803       |
| Apr 8  | 64586 | 1997       | 30781 | -897       | 3993 | 121        | 29812 | 2773       |
| Apr 9  | 66220 | 1634       | 29801 | -980       | 4110 | 117        | 32309 | 2497       |
| Apr 10 | 68192 | 1972       | 28495 | -1306      | 4232 | 122        | 35465 | 3156       |
| Apr 11 | 70029 | 1837       | 23725 | -4770      | 4357 | 125        | 41947 | 6482       |
| Apr 12 | 71686 | 1657       | 23318 | -407       | 4474 | 117        | 43894 | 1947       |
| Apr 13 | 73303 | 1617       | 22735 | -583       | 4585 | 111        | 45983 | 2089       |
| Apr 14 | 74877 | 1574       | 22065 | -670       | 4683 | 98         | 48129 | 2146       |
| Apr 15 | 76389 | 1512       | 21679 | -386       | 4777 | 94         | 49933 | 1804       |
| Apr 16 | 77995 | 1606       | 20897 | -782       | 4869 | 92         | 52229 | 2296       |
| Apr 17 | 79494 | 1499       | 20472 | -425       | 4958 | 89         | 54064 | 1835       |
| Apr 18 | 80868 | 1374       | 19850 | -622       | 5031 | 73         | 55987 | 1923       |
| Apr 19 | 82211 | 1343       | 20070 | 220        | 5118 | 87         | 57023 | 1036       |
| Apr 20 | 83505 | 1294       | 19023 | -1047      | 5209 | 91         | 59273 | 2250       |
| Apr 21 | 84802 | 1297       | 18540 | -483       | 5297 | 88         | 60965 | 1692       |
| Apr 22 | 85996 | 1194       | 17492 | -1048      | 5391 | 94         | 63113 | 2148       |
| Apr 23 | 87026 | 1030       | 16702 | -790       | 5481 | 90         | 64843 | 1730       |
| Apr 24 | 88194 | 1168       | 16021 | -681       | 5574 | 93         | 66599 | 1756       |
| Apr 25 | 89328 | 1134       | 15485 | -536       | 5650 | 76         | 68193 | 1594       |
| Apr 26 | 90481 | 1153       | 15114 | -371       | 5710 | 60         | 69657 | 1464       |

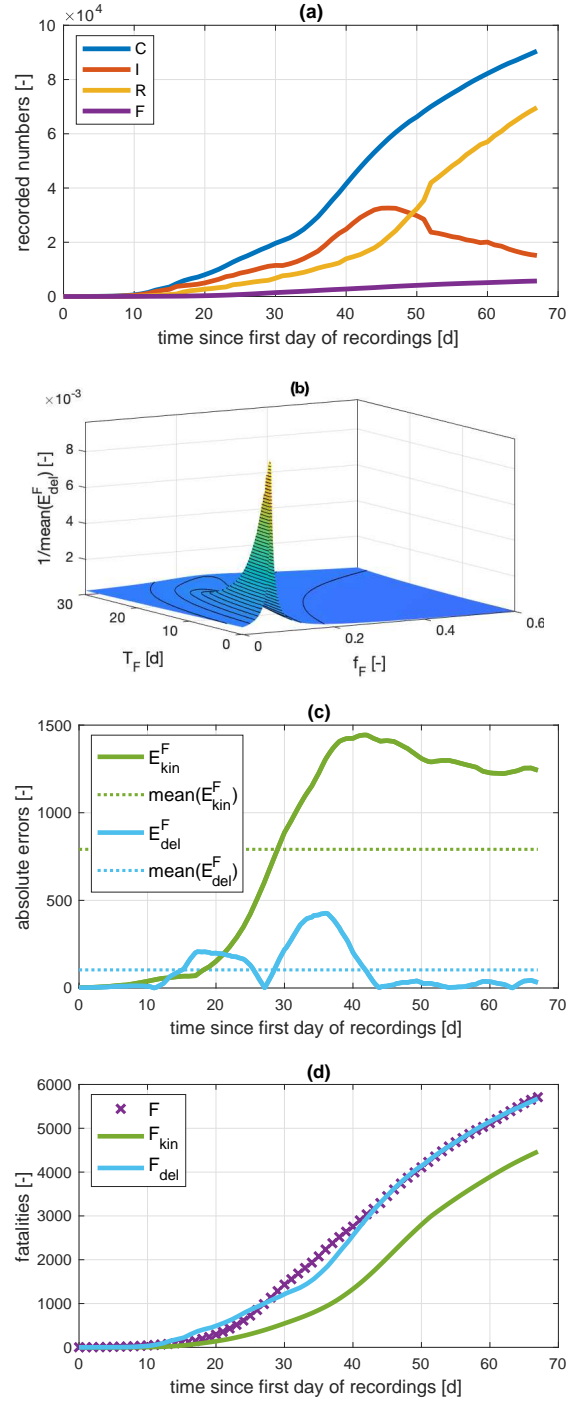

Figure 26: (a) Recorded data, (b) results of optimization based on infection-to-death delay rule, (c) absolute errors based on optimized parameter estimates, and (d) comparison between model-predicted fatalities based on optimized parameter estimates and recorded fatalities for Iran

Table 27: Data recorded in Iraq

| Date   | $C$  | $\Delta C$ | $I$ | $\Delta I$ | $F$ | $\Delta F$ | $R$  | $\Delta R$ |
|--------|------|------------|-----|------------|-----|------------|------|------------|
| Feb 22 | 1    | 1          | 1   | 1          | 0   | 0          | 0    | 0          |
| Feb 23 | 1    | 0          | 1   | 0          | 0   | 0          | 0    | 0          |
| Feb 24 | 1    | 0          | 1   | 0          | 0   | 0          | 0    | 0          |
| Feb 25 | 5    | 4          | 5   | 4          | 0   | 0          | 0    | 0          |
| Feb 26 | 5    | 0          | 5   | 0          | 0   | 0          | 0    | 0          |
| Feb 27 | 7    | 2          | 7   | 2          | 0   | 0          | 0    | 0          |
| Feb 28 | 8    | 1          | 8   | 1          | 0   | 0          | 0    | 0          |
| Feb 29 | 13   | 5          | 13  | 5          | 0   | 0          | 0    | 0          |
| Mar 1  | 19   | 6          | 19  | 6          | 0   | 0          | 0    | 0          |
| Mar 2  | 27   | 8          | 27  | 8          | 0   | 0          | 0    | 0          |
| Mar 3  | 32   | 5          | 32  | 5          | 0   | 0          | 0    | 0          |
| Mar 4  | 37   | 5          | 35  | 3          | 2   | 2          | 0    | 0          |
| Mar 5  | 40   | 3          | 37  | 2          | 3   | 1          | 0    | 0          |
| Mar 6  | 46   | 6          | 41  | 4          | 4   | 1          | 1    | 1          |
| Mar 7  | 54   | 8          | 49  | 8          | 4   | 0          | 1    | 0          |
| Mar 8  | 65   | 11         | 58  | 9          | 6   | 2          | 1    | 0          |
| Mar 9  | 71   | 6          | 61  | 3          | 7   | 1          | 3    | 2          |
| Mar 10 | 71   | 0          | 49  | -12        | 7   | 0          | 15   | 12         |
| Mar 11 | 71   | 0          | 49  | 0          | 7   | 0          | 15   | 0          |
| Mar 12 | 83   | 12         | 51  | 2          | 8   | 1          | 24   | 9          |
| Mar 13 | 101  | 18         | 68  | 17         | 9   | 1          | 24   | 0          |
| Mar 14 | 110  | 9          | 74  | 6          | 10  | 1          | 26   | 2          |
| Mar 15 | 124  | 14         | 88  | 14         | 10  | 0          | 26   | 0          |
| Mar 16 | 133  | 9          | 91  | 3          | 10  | 0          | 32   | 6          |
| Mar 17 | 154  | 21         | 102 | 11         | 11  | 1          | 41   | 9          |
| Mar 18 | 164  | 10         | 111 | 9          | 12  | 1          | 41   | 0          |
| Mar 19 | 192  | 28         | 130 | 19         | 13  | 1          | 49   | 8          |
| Mar 20 | 208  | 16         | 142 | 12         | 17  | 4          | 49   | 0          |
| Mar 21 | 214  | 6          | 146 | 4          | 17  | 0          | 51   | 2          |
| Mar 22 | 233  | 19         | 156 | 10         | 20  | 3          | 57   | 6          |
| Mar 23 | 266  | 33         | 181 | 25         | 23  | 3          | 62   | 5          |
| Mar 24 | 316  | 50         | 214 | 33         | 27  | 4          | 75   | 13         |
| Mar 25 | 346  | 30         | 214 | 0          | 29  | 2          | 103  | 28         |
| Mar 26 | 382  | 36         | 241 | 27         | 36  | 7          | 105  | 2          |
| Mar 27 | 458  | 76         | 296 | 55         | 40  | 4          | 122  | 17         |
| Mar 28 | 506  | 48         | 333 | 37         | 42  | 2          | 131  | 9          |
| Mar 29 | 547  | 41         | 362 | 29         | 42  | 0          | 143  | 12         |
| Mar 30 | 630  | 83         | 432 | 70         | 46  | 4          | 152  | 9          |
| Mar 31 | 694  | 64         | 474 | 42         | 50  | 4          | 170  | 18         |
| Apr 1  | 728  | 34         | 494 | 20         | 52  | 2          | 182  | 12         |
| Apr 2  | 772  | 44         | 516 | 22         | 54  | 2          | 202  | 20         |
| Apr 3  | 820  | 48         | 540 | 24         | 54  | 0          | 226  | 24         |
| Apr 4  | 878  | 58         | 563 | 23         | 56  | 2          | 259  | 33         |
| Apr 5  | 961  | 83         | 621 | 58         | 61  | 5          | 279  | 20         |
| Apr 6  | 1031 | 70         | 623 | 2          | 64  | 3          | 344  | 65         |
| Apr 7  | 1122 | 91         | 684 | 61         | 63  | -1         | 375  | 31         |
| Apr 8  | 1202 | 80         | 681 | -3         | 69  | 6          | 452  | 77         |
| Apr 9  | 1232 | 30         | 667 | -14        | 69  | 0          | 496  | 44         |
| Apr 10 | 1279 | 47         | 659 | -8         | 70  | 1          | 550  | 54         |
| Apr 11 | 1318 | 39         | 645 | -14        | 72  | 2          | 601  | 51         |
| Apr 12 | 1352 | 34         | 636 | -9         | 76  | 4          | 640  | 39         |
| Apr 13 | 1378 | 26         | 583 | -53        | 78  | 2          | 717  | 77         |
| Apr 14 | 1400 | 22         | 556 | -27        | 78  | 0          | 766  | 49         |
| Apr 15 | 1415 | 15         | 524 | -32        | 79  | 1          | 812  | 46         |
| Apr 16 | 1434 | 19         | 498 | -26        | 80  | 1          | 856  | 44         |
| Apr 17 | 1482 | 48         | 495 | -3         | 81  | 1          | 906  | 50         |
| Apr 18 | 1513 | 31         | 478 | -17        | 82  | 1          | 953  | 47         |
| Apr 19 | 1539 | 26         | 448 | -30        | 82  | 0          | 1009 | 56         |
| Apr 20 | 1574 | 35         | 449 | 1          | 82  | 0          | 1043 | 34         |
| Apr 21 | 1602 | 28         | 423 | -26        | 83  | 1          | 1096 | 53         |
| Apr 22 | 1631 | 29         | 402 | -21        | 83  | 0          | 1146 | 50         |
| Apr 23 | 1677 | 46         | 423 | 21         | 83  | 0          | 1171 | 25         |
| Apr 24 | 1708 | 31         | 418 | -5         | 86  | 3          | 1204 | 33         |
| Apr 25 | 1763 | 55         | 453 | 35         | 86  | 0          | 1224 | 20         |
| Apr 26 | 1820 | 57         | 470 | 17         | 87  | 1          | 1263 | 39         |

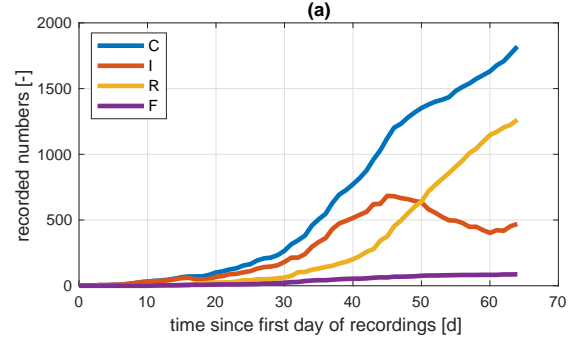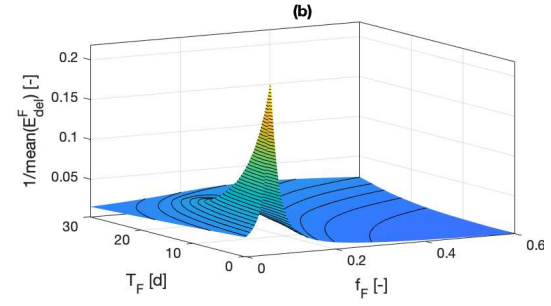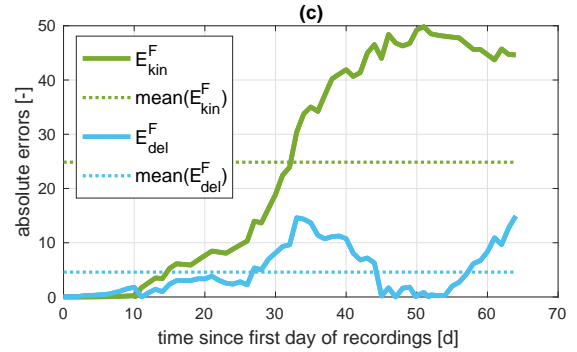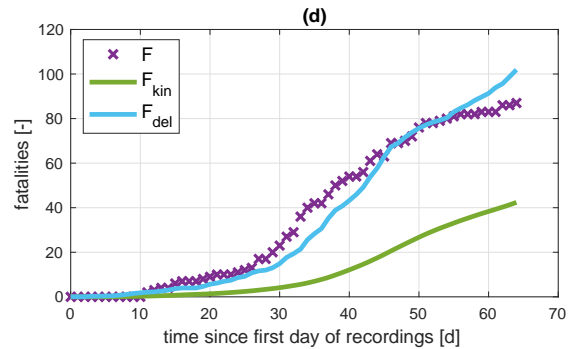

Figure 27: (a) Recorded data, (b) results of optimization based on infection-to-death delay rule, (c) absolute errors based on optimized parameter estimates, and (d) comparison between model-predicted fatalities based on optimized parameter estimates and recorded fatalities for Iraq

Table 28: Data recorded in Ireland

| Date   | $C$   | $\Delta C$ | $I$   | $\Delta I$ | $F$  | $\Delta F$ | $R$  | $\Delta R$ |
|--------|-------|------------|-------|------------|------|------------|------|------------|
| Feb 29 | 1     | 1          | 1     | 1          | 0    | 0          | 0    | 0          |
| Mar 1  | 1     | 0          | 1     | 0          | 0    | 0          | 0    | 0          |
| Mar 2  | 1     | 0          | 1     | 0          | 0    | 0          | 0    | 0          |
| Mar 3  | 2     | 1          | 2     | 1          | 0    | 0          | 0    | 0          |
| Mar 4  | 6     | 4          | 6     | 4          | 0    | 0          | 0    | 0          |
| Mar 5  | 13    | 7          | 13    | 7          | 0    | 0          | 0    | 0          |
| Mar 6  | 18    | 5          | 18    | 5          | 0    | 0          | 0    | 0          |
| Mar 7  | 19    | 1          | 19    | 1          | 0    | 0          | 0    | 0          |
| Mar 8  | 21    | 2          | 21    | 2          | 0    | 0          | 0    | 0          |
| Mar 9  | 24    | 3          | 24    | 3          | 0    | 0          | 0    | 0          |
| Mar 10 | 34    | 10         | 34    | 10         | 0    | 0          | 0    | 0          |
| Mar 11 | 43    | 9          | 42    | 8          | 1    | 1          | 0    | 0          |
| Mar 12 | 70    | 27         | 69    | 27         | 1    | 0          | 0    | 0          |
| Mar 13 | 90    | 20         | 89    | 20         | 1    | 0          | 0    | 0          |
| Mar 14 | 129   | 39         | 127   | 38         | 2    | 1          | 0    | 0          |
| Mar 15 | 170   | 41         | 167   | 40         | 2    | 0          | 1    | 1          |
| Mar 16 | 223   | 53         | 216   | 49         | 2    | 0          | 5    | 4          |
| Mar 17 | 292   | 69         | 285   | 69         | 2    | 0          | 5    | 0          |
| Mar 18 | 366   | 74         | 359   | 74         | 2    | 0          | 5    | 0          |
| Mar 19 | 557   | 191        | 549   | 190        | 3    | 1          | 5    | 0          |
| Mar 20 | 683   | 126        | 675   | 126        | 3    | 0          | 5    | 0          |
| Mar 21 | 785   | 102        | 777   | 102        | 3    | 0          | 5    | 0          |
| Mar 22 | 906   | 121        | 897   | 120        | 4    | 1          | 5    | 0          |
| Mar 23 | 1125  | 219        | 1114  | 217        | 6    | 2          | 5    | 0          |
| Mar 24 | 1329  | 204        | 1317  | 203        | 7    | 1          | 5    | 0          |
| Mar 25 | 1564  | 235        | 1550  | 233        | 9    | 2          | 5    | 0          |
| Mar 26 | 1819  | 255        | 1795  | 245        | 19   | 10         | 5    | 0          |
| Mar 27 | 2121  | 302        | 2094  | 299        | 22   | 3          | 5    | 0          |
| Mar 28 | 2415  | 294        | 2374  | 280        | 36   | 14         | 5    | 0          |
| Mar 29 | 2615  | 200        | 2564  | 190        | 46   | 10         | 5    | 0          |
| Mar 30 | 2910  | 295        | 2851  | 287        | 54   | 8          | 5    | 0          |
| Mar 31 | 3235  | 325        | 3159  | 308        | 71   | 17         | 5    | 0          |
| Apr 1  | 3447  | 212        | 3357  | 198        | 85   | 14         | 5    | 0          |
| Apr 2  | 3849  | 402        | 3746  | 389        | 98   | 13         | 5    | 0          |
| Apr 3  | 4273  | 424        | 4128  | 382        | 120  | 22         | 25   | 20         |
| Apr 4  | 4604  | 331        | 4442  | 314        | 137  | 17         | 25   | 0          |
| Apr 5  | 4994  | 390        | 4811  | 369        | 158  | 21         | 25   | 0          |
| Apr 6  | 5364  | 370        | 5165  | 354        | 174  | 16         | 25   | 0          |
| Apr 7  | 5709  | 345        | 5474  | 309        | 210  | 36         | 25   | 0          |
| Apr 8  | 6074  | 365        | 5814  | 340        | 235  | 25         | 25   | 0          |
| Apr 9  | 6574  | 500        | 6286  | 472        | 263  | 28         | 25   | 0          |
| Apr 10 | 8089  | 1515       | 7777  | 1491       | 287  | 24         | 25   | 0          |
| Apr 11 | 8928  | 839        | 8583  | 806        | 320  | 33         | 25   | 0          |
| Apr 12 | 9655  | 727        | 9296  | 713        | 334  | 14         | 25   | 0          |
| Apr 13 | 10647 | 992        | 10257 | 961        | 365  | 31         | 25   | 0          |
| Apr 14 | 11479 | 832        | 11048 | 791        | 406  | 41         | 25   | 0          |
| Apr 15 | 12547 | 1068       | 12026 | 978        | 444  | 38         | 77   | 52         |
| Apr 16 | 13271 | 724        | 12708 | 682        | 486  | 42         | 77   | 0          |
| Apr 17 | 13980 | 709        | 13373 | 665        | 530  | 44         | 77   | 0          |
| Apr 18 | 14758 | 778        | 14110 | 737        | 571  | 41         | 77   | 0          |
| Apr 19 | 15251 | 493        | 14564 | 454        | 610  | 39         | 77   | 0          |
| Apr 20 | 15652 | 401        | 14888 | 324        | 687  | 77         | 77   | 0          |
| Apr 21 | 16040 | 388        | 6077  | -8811      | 730  | 43         | 9233 | 9156       |
| Apr 22 | 16671 | 631        | 6669  | 592        | 769  | 39         | 9233 | 0          |
| Apr 23 | 17607 | 936        | 7580  | 911        | 794  | 25         | 9233 | 0          |
| Apr 24 | 18184 | 577        | 7937  | 357        | 1014 | 220        | 9233 | 0          |
| Apr 25 | 18561 | 377        | 8265  | 328        | 1063 | 49         | 9233 | 0          |
| Apr 26 | 19262 | 701        | 8942  | 677        | 1087 | 24         | 9233 | 0          |

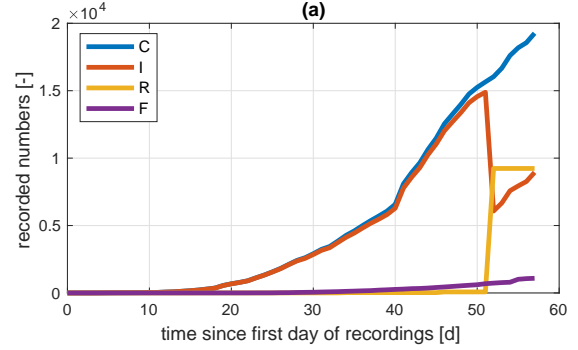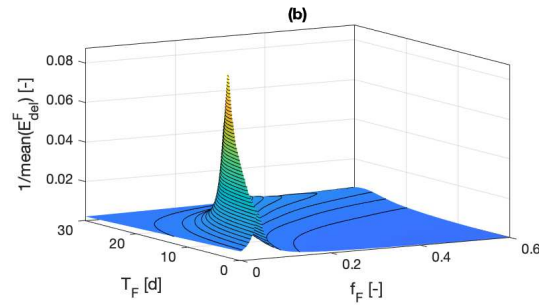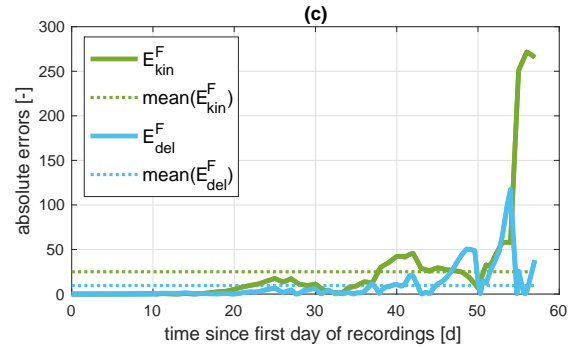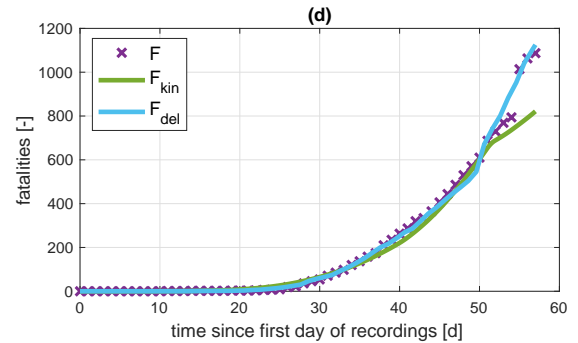

Figure 28: (a) Recorded data, (b) results of optimization based on infection-to-death delay rule, (c) absolute errors based on optimized parameter estimates, and (d) comparison between model-predicted fatalities based on optimized parameter estimates and recorded fatalities for Ireland



Table 29: Data recorded in Israel

| Date   | $C$   | $\Delta C$ | $I$  | $\Delta I$ | $F$ | $\Delta F$ | $R$  | $\Delta R$ |
|--------|-------|------------|------|------------|-----|------------|------|------------|
| Feb 21 | 1     | 1          | 1    | 1          | 0   | 0          | 0    | 0          |
| Feb 22 | 1     | 0          | 1    | 0          | 0   | 0          | 0    | 0          |
| Feb 23 | 2     | 1          | 2    | 1          | 0   | 0          | 0    | 0          |
| Feb 24 | 2     | 0          | 2    | 0          | 0   | 0          | 0    | 0          |
| Feb 25 | 2     | 0          | 2    | 0          | 0   | 0          | 0    | 0          |
| Feb 26 | 2     | 0          | 2    | 0          | 0   | 0          | 0    | 0          |
| Feb 27 | 3     | 1          | 3    | 1          | 0   | 0          | 0    | 0          |
| Feb 28 | 7     | 4          | 6    | 3          | 0   | 0          | 1    | 1          |
| Feb 29 | 7     | 0          | 6    | 0          | 0   | 0          | 1    | 0          |
| Mar 1  | 10    | 3          | 9    | 3          | 0   | 0          | 1    | 0          |
| Mar 2  | 12    | 2          | 11   | 2          | 0   | 0          | 1    | 0          |
| Mar 3  | 12    | 0          | 11   | 0          | 0   | 0          | 1    | 0          |
| Mar 4  | 15    | 3          | 14   | 3          | 0   | 0          | 1    | 0          |
| Mar 5  | 17    | 2          | 15   | 1          | 0   | 0          | 2    | 1          |
| Mar 6  | 21    | 4          | 19   | 4          | 0   | 0          | 2    | 0          |
| Mar 7  | 25    | 4          | 22   | 3          | 0   | 0          | 3    | 1          |
| Mar 8  | 39    | 14         | 36   | 14         | 0   | 0          | 3    | 0          |
| Mar 9  | 50    | 11         | 46   | 10         | 0   | 0          | 4    | 1          |
| Mar 10 | 75    | 25         | 71   | 25         | 0   | 0          | 4    | 0          |
| Mar 11 | 97    | 22         | 93   | 22         | 0   | 0          | 4    | 0          |
| Mar 12 | 109   | 12         | 105  | 12         | 0   | 0          | 4    | 0          |
| Mar 13 | 143   | 34         | 139  | 34         | 0   | 0          | 4    | 0          |
| Mar 14 | 193   | 50         | 189  | 50         | 0   | 0          | 4    | 0          |
| Mar 15 | 213   | 20         | 209  | 20         | 0   | 0          | 4    | 0          |
| Mar 16 | 298   | 85         | 294  | 85         | 0   | 0          | 4    | 0          |
| Mar 17 | 337   | 39         | 326  | 32         | 0   | 0          | 11   | 7          |
| Mar 18 | 433   | 96         | 422  | 96         | 0   | 0          | 11   | 0          |
| Mar 19 | 677   | 244        | 663  | 241        | 0   | 0          | 14   | 3          |
| Mar 20 | 705   | 28         | 689  | 26         | 1   | 1          | 15   | 1          |
| Mar 21 | 883   | 178        | 846  | 157        | 1   | 0          | 36   | 21         |
| Mar 22 | 1071  | 188        | 1033 | 187        | 1   | 0          | 37   | 1          |
| Mar 23 | 1442  | 371        | 1400 | 367        | 1   | 0          | 41   | 4          |
| Mar 24 | 1930  | 488        | 1874 | 474        | 3   | 2          | 53   | 12         |
| Mar 25 | 2369  | 439        | 2306 | 432        | 5   | 2          | 58   | 5          |
| Mar 26 | 2693  | 324        | 2617 | 311        | 8   | 3          | 68   | 10         |
| Mar 27 | 3035  | 342        | 2944 | 327        | 12  | 4          | 79   | 11         |
| Mar 28 | 3619  | 584        | 3518 | 574        | 12  | 0          | 89   | 10         |
| Mar 29 | 4247  | 628        | 4100 | 582        | 15  | 3          | 132  | 43         |
| Mar 30 | 4695  | 448        | 4518 | 418        | 16  | 1          | 161  | 29         |
| Mar 31 | 5358  | 663        | 5114 | 596        | 20  | 4          | 224  | 63         |
| Apr 1  | 6092  | 734        | 5825 | 711        | 26  | 6          | 241  | 17         |
| Apr 2  | 6857  | 765        | 6483 | 658        | 36  | 10         | 338  | 97         |
| Apr 3  | 7428  | 571        | 6985 | 502        | 40  | 4          | 403  | 65         |
| Apr 4  | 7851  | 423        | 7380 | 395        | 44  | 4          | 427  | 24         |
| Apr 5  | 8430  | 579        | 7904 | 524        | 49  | 5          | 477  | 50         |
| Apr 6  | 8904  | 474        | 8262 | 358        | 57  | 8          | 585  | 108        |
| Apr 7  | 9248  | 344        | 8413 | 151        | 65  | 8          | 770  | 185        |
| Apr 8  | 9404  | 156        | 8530 | 117        | 73  | 8          | 801  | 31         |
| Apr 9  | 9968  | 564        | 8871 | 341        | 86  | 13         | 1011 | 210        |
| Apr 10 | 10408 | 440        | 9130 | 259        | 95  | 9          | 1183 | 172        |
| Apr 11 | 10743 | 335        | 9301 | 171        | 101 | 6          | 1341 | 158        |
| Apr 12 | 11145 | 402        | 9415 | 114        | 103 | 2          | 1627 | 286        |
| Apr 13 | 11586 | 441        | 9615 | 200        | 116 | 13         | 1855 | 228        |
| Apr 14 | 12046 | 460        | 9728 | 113        | 123 | 7          | 2195 | 340        |
| Apr 15 | 12501 | 455        | 9808 | 80         | 130 | 7          | 2563 | 368        |
| Apr 16 | 12758 | 257        | 9798 | -10        | 142 | 12         | 2818 | 255        |
| Apr 17 | 12982 | 224        | 9705 | -93        | 151 | 9          | 3126 | 308        |
| Apr 18 | 13265 | 283        | 9645 | -60        | 164 | 13         | 3456 | 330        |
| Apr 19 | 13491 | 226        | 9565 | -80        | 172 | 8          | 3754 | 298        |
| Apr 20 | 13713 | 222        | 9487 | -78        | 177 | 5          | 4049 | 295        |
| Apr 21 | 13942 | 229        | 9251 | -236       | 184 | 7          | 4507 | 458        |
| Apr 22 | 14498 | 556        | 9094 | -157       | 189 | 5          | 5215 | 708        |
| Apr 23 | 14803 | 305        | 9000 | -94        | 192 | 3          | 5611 | 396        |
| Apr 24 | 15058 | 255        | 8861 | -139       | 194 | 2          | 6003 | 392        |
| Apr 25 | 15298 | 240        | 8664 | -197       | 199 | 5          | 6435 | 432        |
| Apr 26 | 15443 | 145        | 8511 | -153       | 201 | 2          | 6731 | 296        |

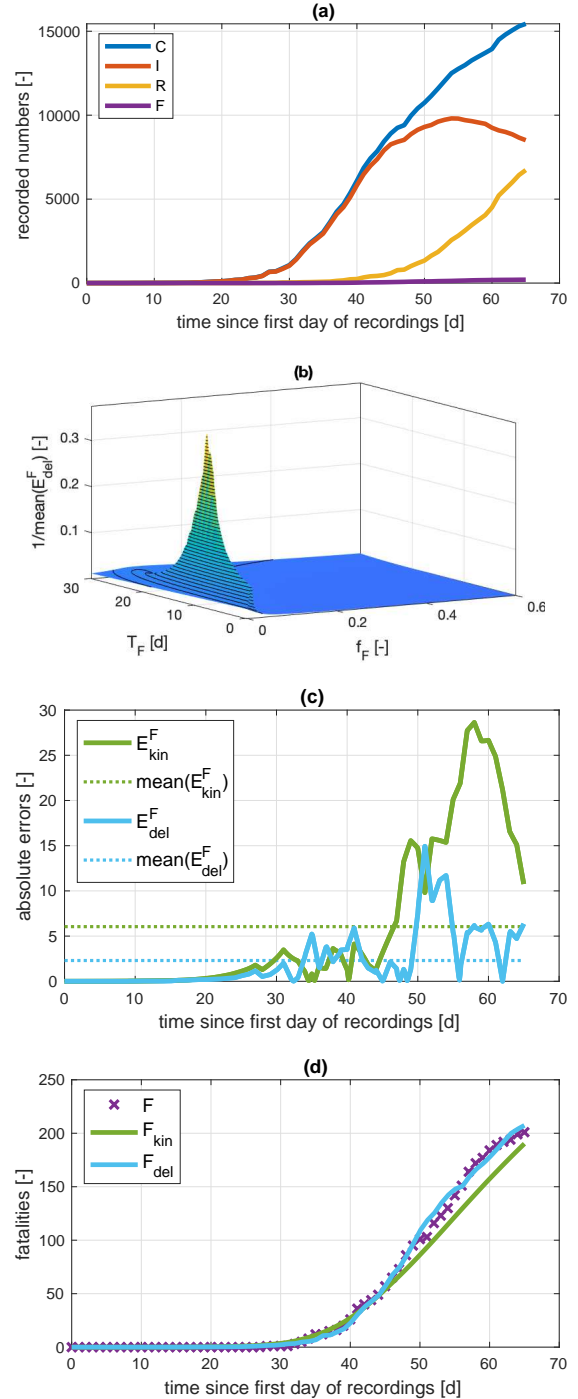

Figure 29: (a) Recorded data, (b) results of optimization based on infection-to-death delay rule, (c) absolute errors based on optimized parameter estimates, and (d) comparison between model-predicted fatalities based on optimized parameter estimates and recorded fatalities for Israel

Table 30: Data recorded in Italy

| Date   | $C$    | $\Delta C$ | $I$    | $\Delta I$ | $F$   | $\Delta F$ | $R$   | $\Delta R$ |
|--------|--------|------------|--------|------------|-------|------------|-------|------------|
| Feb 15 | 3      | 3          | 3      | 3          | 0     | 0          | 0     | 0          |
| Feb 16 | 3      | 0          | 3      | 0          | 0     | 0          | 0     | 0          |
| Feb 17 | 3      | 0          | 3      | 0          | 0     | 0          | 0     | 0          |
| Feb 18 | 3      | 0          | 3      | 0          | 0     | 0          | 0     | 0          |
| Feb 19 | 3      | 0          | 3      | 0          | 0     | 0          | 0     | 0          |
| Feb 20 | 4      | 1          | 4      | 1          | 0     | 0          | 0     | 0          |
| Feb 21 | 21     | 17         | 19     | 15         | 1     | 1          | 1     | 1          |
| Feb 22 | 79     | 58         | 75     | 56         | 2     | 1          | 2     | 1          |
| Feb 23 | 157    | 78         | 152    | 77         | 3     | 1          | 2     | 0          |
| Feb 24 | 229    | 72         | 221    | 69         | 7     | 4          | 1     | -1         |
| Feb 25 | 323    | 94         | 310    | 89         | 11    | 4          | 2     | 1          |
| Feb 26 | 470    | 147        | 455    | 145        | 12    | 1          | 3     | 1          |
| Feb 27 | 655    | 185        | 593    | 138        | 17    | 5          | 45    | 42         |
| Feb 28 | 889    | 234        | 822    | 229        | 21    | 4          | 46    | 1          |
| Feb 29 | 1128   | 239        | 1049   | 227        | 29    | 8          | 50    | 4          |
| Mar 1  | 1701   | 573        | 1577   | 528        | 41    | 12         | 83    | 33         |
| Mar 2  | 2036   | 335        | 1835   | 258        | 52    | 11         | 149   | 66         |
| Mar 3  | 2502   | 466        | 2263   | 428        | 79    | 27         | 160   | 11         |
| Mar 4  | 3089   | 587        | 2706   | 443        | 107   | 28         | 276   | 116        |
| Mar 5  | 3858   | 769        | 3296   | 590        | 148   | 41         | 414   | 138        |
| Mar 6  | 4636   | 778        | 3916   | 620        | 197   | 49         | 523   | 109        |
| Mar 7  | 5883   | 1247       | 5061   | 1145       | 233   | 36         | 589   | 66         |
| Mar 8  | 7375   | 1492       | 6387   | 1326       | 366   | 133        | 622   | 33         |
| Mar 9  | 9172   | 1797       | 7985   | 1598       | 463   | 97         | 724   | 102        |
| Mar 10 | 10149  | 977        | 8514   | 529        | 631   | 168        | 1004  | 280        |
| Mar 11 | 12462  | 2313       | 10590  | 2076       | 827   | 196        | 1045  | 41         |
| Mar 12 | 15113  | 2651       | 12839  | 2249       | 1016  | 189        | 1258  | 213        |
| Mar 13 | 17660  | 2547       | 14955  | 2116       | 1266  | 250        | 1439  | 181        |
| Mar 14 | 21157  | 3497       | 17750  | 2795       | 1441  | 175        | 1966  | 527        |
| Mar 15 | 24747  | 3590       | 20603  | 2853       | 1809  | 368        | 2335  | 369        |
| Mar 16 | 27980  | 3233       | 23073  | 2470       | 2158  | 349        | 2749  | 414        |
| Mar 17 | 31506  | 3526       | 26062  | 2989       | 2503  | 345        | 2941  | 192        |
| Mar 18 | 35713  | 4207       | 28710  | 2648       | 2978  | 475        | 4025  | 1084       |
| Mar 19 | 41035  | 5322       | 33190  | 4480       | 3405  | 427        | 4440  | 415        |
| Mar 20 | 47021  | 5986       | 37860  | 4670       | 4032  | 627        | 5129  | 689        |
| Mar 21 | 53578  | 6557       | 42681  | 4821       | 4825  | 793        | 6072  | 943        |
| Mar 22 | 59138  | 5560       | 46638  | 3957       | 5476  | 651        | 7024  | 952        |
| Mar 23 | 63927  | 4789       | 50418  | 3780       | 6077  | 601        | 7432  | 408        |
| Mar 24 | 69176  | 5249       | 54030  | 3612       | 6820  | 743        | 8326  | 894        |
| Mar 25 | 74386  | 5210       | 57521  | 3491       | 7503  | 683        | 9362  | 1036       |
| Mar 26 | 80589  | 6203       | 62013  | 4492       | 8215  | 712        | 10361 | 999        |
| Mar 27 | 86498  | 5909       | 66414  | 4401       | 9134  | 919        | 10950 | 589        |
| Mar 28 | 92472  | 5974       | 70065  | 3651       | 10023 | 889        | 12384 | 1434       |
| Mar 29 | 97689  | 5217       | 73880  | 3815       | 10779 | 756        | 13030 | 646        |
| Mar 30 | 101739 | 4050       | 75528  | 1648       | 11591 | 812        | 14620 | 1590       |
| Mar 31 | 105792 | 4053       | 77635  | 2107       | 12428 | 837        | 15729 | 1109       |
| Apr 1  | 110574 | 4782       | 80572  | 2937       | 13155 | 727        | 16847 | 1118       |
| Apr 2  | 115242 | 4668       | 83049  | 2477       | 13915 | 760        | 18278 | 1431       |
| Apr 3  | 119827 | 4585       | 85388  | 2339       | 14681 | 766        | 19758 | 1480       |
| Apr 4  | 124632 | 4805       | 88274  | 2886       | 15362 | 681        | 20996 | 1238       |
| Apr 5  | 128948 | 4316       | 91246  | 2972       | 15887 | 525        | 21815 | 819        |
| Apr 6  | 132547 | 3599       | 93187  | 1941       | 16523 | 636        | 22837 | 1022       |
| Apr 7  | 135586 | 3039       | 94067  | 880        | 17127 | 604        | 24392 | 1555       |
| Apr 8  | 139422 | 3836       | 95262  | 1195       | 17669 | 542        | 26491 | 2099       |
| Apr 9  | 143626 | 4204       | 96877  | 1615       | 18279 | 610        | 28470 | 1979       |
| Apr 10 | 147577 | 3951       | 98273  | 1396       | 18849 | 570        | 30455 | 1985       |
| Apr 11 | 152271 | 4694       | 100269 | 1996       | 19468 | 619        | 32534 | 2079       |
| Apr 12 | 156363 | 4092       | 102253 | 1984       | 19899 | 431        | 34211 | 1677       |
| Apr 13 | 159516 | 3153       | 103616 | 1363       | 20465 | 566        | 35435 | 1224       |
| Apr 14 | 162488 | 2972       | 104291 | 675        | 21067 | 602        | 37130 | 1695       |
| Apr 15 | 165155 | 2667       | 105418 | 1127       | 21645 | 578        | 38092 | 962        |
| Apr 16 | 168941 | 3786       | 106607 | 1189       | 22170 | 525        | 40164 | 2072       |
| Apr 17 | 172434 | 3493       | 106962 | 355        | 22745 | 575        | 42727 | 2563       |
| Apr 18 | 175925 | 3491       | 107771 | 809        | 23227 | 482        | 44927 | 2200       |
| Apr 19 | 178972 | 3047       | 108257 | 486        | 23660 | 433        | 47055 | 2128       |
| Apr 20 | 181228 | 2256       | 108237 | -20        | 24114 | 454        | 48877 | 1822       |
| Apr 21 | 183957 | 2729       | 107709 | -528       | 24648 | 534        | 51600 | 2723       |
| Apr 22 | 187327 | 3370       | 107699 | -10        | 25085 | 437        | 54543 | 2943       |
| Apr 23 | 189973 | 2646       | 106848 | -851       | 25549 | 464        | 57576 | 3033       |
| Apr 24 | 192994 | 3021       | 106527 | -321       | 25969 | 420        | 60498 | 2922       |
| Apr 25 | 195351 | 2357       | 105847 | -680       | 26384 | 415        | 63120 | 2622       |
| Apr 26 | 197675 | 2324       | 106103 | 256        | 26644 | 260        | 64928 | 1808       |

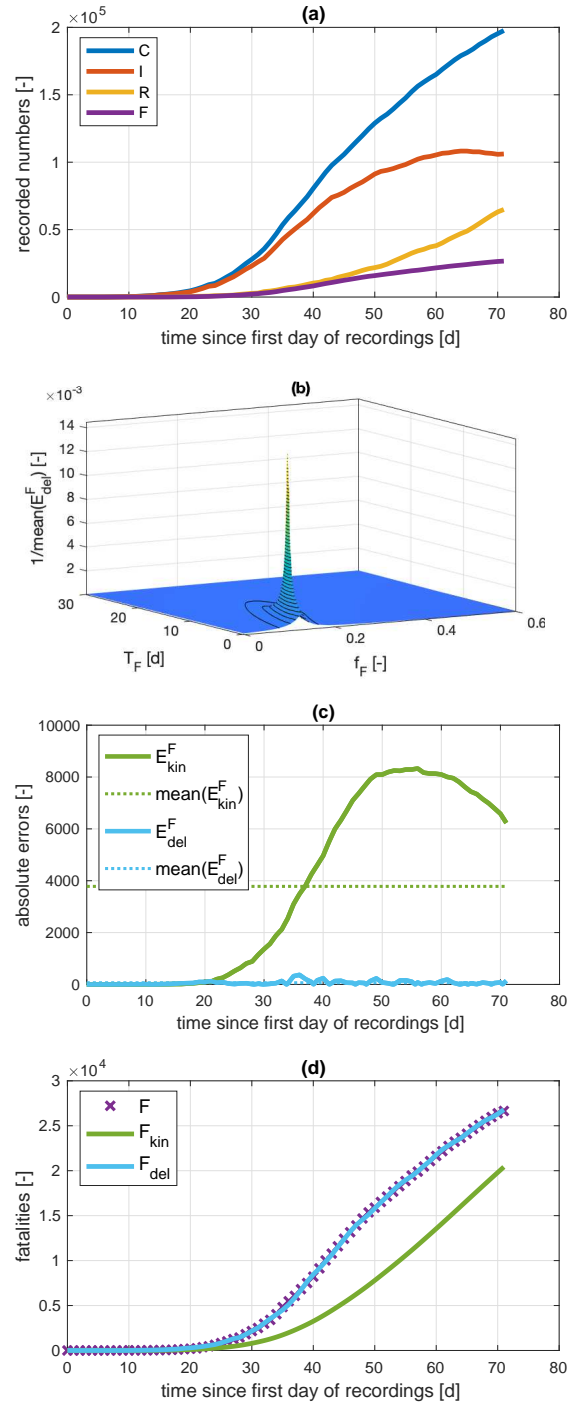

Figure 30: (a) Recorded data, (b) results of optimization based on infection-to-death delay rule, (c) absolute errors based on optimized parameter estimates, and (d) comparison between model-predicted fatalities based on optimized parameter estimates and recorded fatalities for Italy

Table 31: Data recorded in Japan

| Date   | $C$   | $\Delta C$ | $I$   | $\Delta I$ | $F$ | $\Delta F$ | $R$  | $\Delta R$ |
|--------|-------|------------|-------|------------|-----|------------|------|------------|
| Feb 15 | 53    | 53         | 52    | 52         | 1   | 1          | 0    | 0          |
| Feb 16 | 59    | 6          | 58    | 6          | 1   | 0          | 0    | 0          |
| Feb 17 | 66    | 7          | 47    | -11        | 1   | 0          | 18   | 18         |
| Feb 18 | 74    | 8          | 53    | 6          | 1   | 0          | 20   | 2          |
| Feb 19 | 84    | 10         | 63    | 10         | 1   | 0          | 20   | 0          |
| Feb 20 | 94    | 10         | 73    | 10         | 1   | 0          | 20   | 0          |
| Feb 21 | 109   | 15         | 86    | 13         | 1   | 0          | 22   | 2          |
| Feb 22 | 134   | 25         | 111   | 25         | 1   | 0          | 22   | 0          |
| Feb 23 | 146   | 12         | 122   | 11         | 1   | 0          | 23   | 1          |
| Feb 24 | 159   | 13         | 135   | 13         | 1   | 0          | 23   | 0          |
| Feb 25 | 161   | 2          | 137   | 2          | 1   | 0          | 23   | 0          |
| Feb 26 | 172   | 11         | 146   | 9          | 1   | 0          | 25   | 2          |
| Feb 27 | 214   | 42         | 178   | 32         | 3   | 2          | 33   | 8          |
| Feb 28 | 233   | 19         | 196   | 18         | 4   | 1          | 33   | 0          |
| Feb 29 | 241   | 8          | 204   | 8          | 5   | 1          | 32   | -1         |
| Mar 1  | 256   | 15         | 208   | 4          | 5   | 0          | 43   | 11         |
| Mar 2  | 274   | 18         | 226   | 18         | 6   | 1          | 42   | -1         |
| Mar 3  | 293   | 19         | 244   | 18         | 6   | 0          | 43   | 1          |
| Mar 4  | 331   | 38         | 282   | 38         | 6   | 0          | 43   | 0          |
| Mar 5  | 364   | 33         | 315   | 33         | 6   | 0          | 43   | 0          |
| Mar 6  | 420   | 56         | 365   | 50         | 6   | 0          | 49   | 6          |
| Mar 7  | 461   | 41         | 379   | 14         | 6   | 0          | 76   | 27         |
| Mar 8  | 502   | 41         | 419   | 40         | 7   | 1          | 76   | 0          |
| Mar 9  | 530   | 28         | 437   | 18         | 9   | 2          | 84   | 8          |
| Mar 10 | 587   | 57         | 473   | 36         | 12  | 3          | 102  | 18         |
| Mar 11 | 639   | 52         | 506   | 33         | 15  | 3          | 118  | 16         |
| Mar 12 | 691   | 52         | 554   | 48         | 19  | 4          | 118  | 0          |
| Mar 13 | 734   | 43         | 595   | 41         | 21  | 2          | 118  | 0          |
| Mar 14 | 804   | 70         | 638   | 43         | 22  | 1          | 144  | 26         |
| Mar 15 | 833   | 29         | 665   | 27         | 24  | 2          | 144  | 0          |
| Mar 16 | 850   | 17         | 678   | 13         | 28  | 4          | 144  | 0          |
| Mar 17 | 878   | 28         | 705   | 27         | 29  | 1          | 144  | 0          |
| Mar 18 | 914   | 36         | 694   | -11        | 29  | 0          | 191  | 47         |
| Mar 19 | 943   | 29         | 719   | 25         | 33  | 4          | 191  | 0          |
| Mar 20 | 1007  | 64         | 757   | 38         | 35  | 2          | 215  | 24         |
| Mar 21 | 1054  | 47         | 803   | 46         | 36  | 1          | 215  | 0          |
| Mar 22 | 1101  | 47         | 825   | 22         | 41  | 5          | 235  | 20         |
| Mar 23 | 1128  | 27         | 851   | 26         | 42  | 1          | 235  | 0          |
| Mar 24 | 1193  | 65         | 865   | 14         | 43  | 1          | 285  | 50         |
| Mar 25 | 1307  | 114        | 952   | 87         | 45  | 2          | 310  | 25         |
| Mar 26 | 1387  | 80         | 981   | 29         | 47  | 2          | 359  | 49         |
| Mar 27 | 1499  | 112        | 1078  | 97         | 49  | 2          | 372  | 13         |
| Mar 28 | 1693  | 194        | 1237  | 159        | 52  | 3          | 404  | 32         |
| Mar 29 | 1866  | 173        | 1388  | 151        | 54  | 2          | 424  | 20         |
| Mar 30 | 1953  | 87         | 1473  | 85         | 56  | 2          | 424  | 0          |
| Mar 31 | 2178  | 225        | 1697  | 224        | 57  | 1          | 424  | 0          |
| Apr 1  | 2384  | 206        | 1855  | 158        | 57  | 0          | 472  | 48         |
| Apr 2  | 2617  | 233        | 2082  | 227        | 63  | 6          | 472  | 0          |
| Apr 3  | 2935  | 318        | 2352  | 270        | 69  | 6          | 514  | 42         |
| Apr 4  | 3139  | 204        | 2548  | 196        | 77  | 8          | 514  | 0          |
| Apr 5  | 3654  | 515        | 2994  | 446        | 85  | 8          | 575  | 61         |
| Apr 6  | 3906  | 252        | 3222  | 228        | 92  | 7          | 592  | 17         |
| Apr 7  | 4257  | 351        | 3542  | 320        | 93  | 1          | 622  | 30         |
| Apr 8  | 4667  | 410        | 3941  | 399        | 94  | 1          | 632  | 10         |
| Apr 9  | 5347  | 680        | 4563  | 622        | 99  | 5          | 685  | 53         |
| Apr 10 | 6005  | 658        | 5221  | 658        | 99  | 0          | 685  | 0          |
| Apr 11 | 6748  | 743        | 5878  | 657        | 108 | 9          | 762  | 77         |
| Apr 12 | 7370  | 622        | 6463  | 585        | 123 | 15         | 784  | 22         |
| Apr 13 | 7618  | 248        | 6676  | 213        | 143 | 20         | 799  | 15         |
| Apr 14 | 7885  | 267        | 6886  | 210        | 146 | 3          | 853  | 54         |
| Apr 15 | 8626  | 741        | 7547  | 661        | 178 | 32         | 901  | 48         |
| Apr 16 | 9231  | 605        | 8106  | 559        | 190 | 12         | 935  | 34         |
| Apr 17 | 9787  | 556        | 8662  | 556        | 190 | 0          | 935  | 0          |
| Apr 18 | 10296 | 509        | 9005  | 343        | 222 | 32         | 1069 | 134        |
| Apr 19 | 10797 | 501        | 9402  | 397        | 236 | 14         | 1159 | 90         |
| Apr 20 | 11135 | 338        | 9633  | 231        | 263 | 27         | 1239 | 80         |
| Apr 21 | 11512 | 377        | 9875  | 242        | 281 | 18         | 1356 | 117        |
| Apr 22 | 11950 | 438        | 10227 | 352        | 299 | 18         | 1424 | 68         |
| Apr 23 | 12368 | 418        | 10546 | 319        | 328 | 29         | 1494 | 70         |
| Apr 24 | 12712 | 344        | 10837 | 291        | 345 | 17         | 1530 | 36         |
| Apr 25 | 13231 | 519        | 11215 | 378        | 360 | 15         | 1656 | 126        |
| Apr 26 | 13441 | 210        | 11260 | 45         | 372 | 12         | 1809 | 153        |

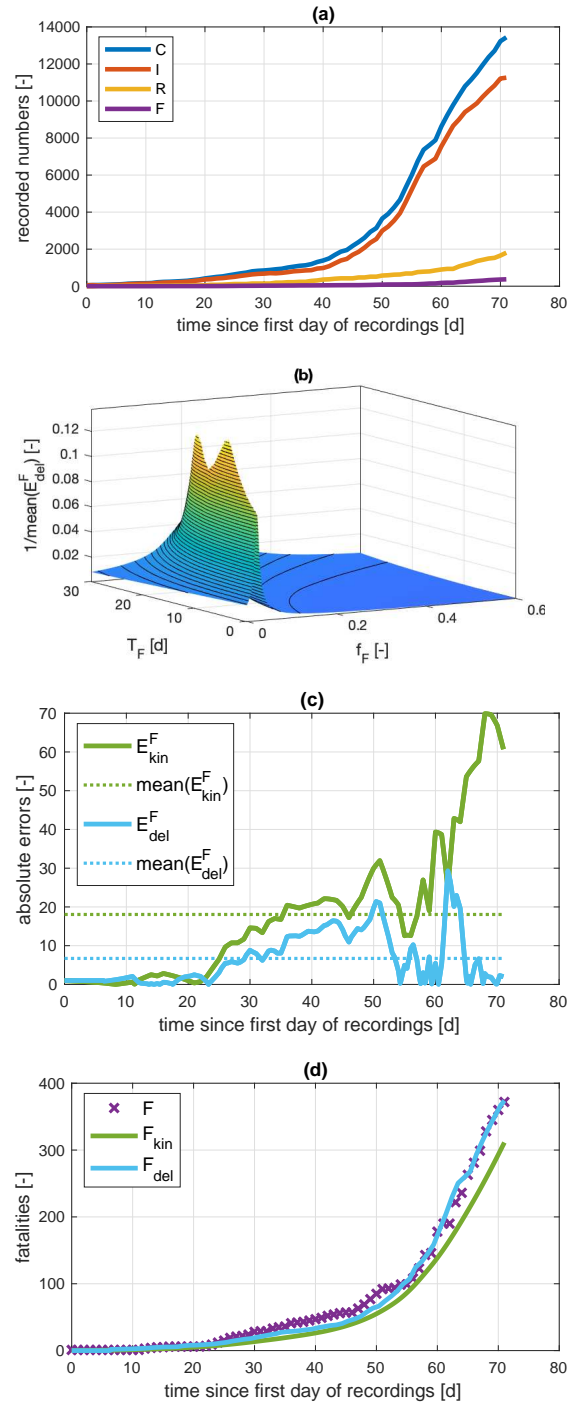

Figure 31: (a) Recorded data, (b) results of optimization based on infection-to-death delay rule, (c) absolute errors based on optimized parameter estimates, and (d) comparison between model-predicted fatalities based on optimized parameter estimates and recorded fatalities for Japan

Table 32: Data recorded in Luxembourg

| Date   | $C$  | $\Delta C$ | $I$  | $\Delta I$ | $F$ | $\Delta F$ | $R$  | $\Delta R$ |
|--------|------|------------|------|------------|-----|------------|------|------------|
| Feb 29 | 1    | 1          | 0    | 0          | 0   | 0          | 1    | 1          |
| Mar 1  | 1    | 0          | 1    | 1          | 0   | 0          | 0    | -1         |
| Mar 2  | 1    | 0          | 1    | 0          | 0   | 0          | 0    | 0          |
| Mar 3  | 1    | 0          | 1    | 0          | 0   | 0          | 0    | 0          |
| Mar 4  | 1    | 0          | 1    | 0          | 0   | 0          | 0    | 0          |
| Mar 5  | 2    | 1          | 1    | 0          | 0   | 0          | 1    | 1          |
| Mar 6  | 3    | 1          | 3    | 2          | 0   | 0          | 0    | -1         |
| Mar 7  | 4    | 1          | 4    | 1          | 0   | 0          | 0    | 0          |
| Mar 8  | 5    | 1          | 5    | 1          | 0   | 0          | 0    | 0          |
| Mar 9  | 5    | 0          | 5    | 0          | 0   | 0          | 0    | 0          |
| Mar 10 | 7    | 2          | 7    | 2          | 0   | 0          | 0    | 0          |
| Mar 11 | 7    | 0          | 7    | 0          | 0   | 0          | 0    | 0          |
| Mar 12 | 26   | 19         | 26   | 19         | 0   | 0          | 0    | 0          |
| Mar 13 | 38   | 12         | 37   | 11         | 1   | 1          | 0    | 0          |
| Mar 14 | 51   | 13         | 50   | 13         | 1   | 0          | 0    | 0          |
| Mar 15 | 77   | 26         | 76   | 26         | 1   | 0          | 0    | 0          |
| Mar 16 | 81   | 4          | 80   | 4          | 1   | 0          | 0    | 0          |
| Mar 17 | 140  | 59         | 139  | 59         | 1   | 0          | 0    | 0          |
| Mar 18 | 203  | 63         | 201  | 62         | 2   | 1          | 0    | 0          |
| Mar 19 | 335  | 132        | 325  | 124        | 4   | 2          | 6    | 6          |
| Mar 20 | 484  | 149        | 473  | 148        | 5   | 1          | 6    | 0          |
| Mar 21 | 670  | 186        | 656  | 183        | 8   | 3          | 6    | 0          |
| Mar 22 | 798  | 128        | 784  | 128        | 8   | 0          | 6    | 0          |
| Mar 23 | 875  | 77         | 861  | 77         | 8   | 0          | 6    | 0          |
| Mar 24 | 1099 | 224        | 1085 | 224        | 8   | 0          | 6    | 0          |
| Mar 25 | 1333 | 234        | 1319 | 234        | 8   | 0          | 6    | 0          |
| Mar 26 | 1453 | 120        | 1438 | 119        | 9   | 1          | 6    | 0          |
| Mar 27 | 1605 | 152        | 1550 | 112        | 15  | 6          | 40   | 34         |
| Mar 28 | 1831 | 226        | 1773 | 223        | 18  | 3          | 40   | 0          |
| Mar 29 | 1950 | 119        | 1889 | 116        | 21  | 3          | 40   | 0          |
| Mar 30 | 1988 | 38         | 1926 | 37         | 22  | 1          | 40   | 0          |
| Mar 31 | 2178 | 190        | 2075 | 149        | 23  | 1          | 80   | 40         |
| Apr 1  | 2319 | 141        | 2210 | 135        | 29  | 6          | 80   | 0          |
| Apr 2  | 2487 | 168        | 2377 | 167        | 30  | 1          | 80   | 0          |
| Apr 3  | 2612 | 125        | 2081 | -296       | 31  | 1          | 500  | 420        |
| Apr 4  | 2729 | 117        | 2198 | 117        | 31  | 0          | 500  | 0          |
| Apr 5  | 2804 | 75         | 2268 | 70         | 36  | 5          | 500  | 0          |
| Apr 6  | 2843 | 39         | 2302 | 34         | 41  | 5          | 500  | 0          |
| Apr 7  | 2970 | 127        | 2426 | 124        | 44  | 3          | 500  | 0          |
| Apr 8  | 3034 | 64         | 2488 | 62         | 46  | 2          | 500  | 0          |
| Apr 9  | 3115 | 81         | 2563 | 75         | 52  | 6          | 500  | 0          |
| Apr 10 | 3223 | 108        | 2669 | 106        | 54  | 2          | 500  | 0          |
| Apr 11 | 3270 | 47         | 2708 | 39         | 62  | 8          | 500  | 0          |
| Apr 12 | 3281 | 11         | 2715 | 7          | 66  | 4          | 500  | 0          |
| Apr 13 | 3292 | 11         | 2723 | 8          | 69  | 3          | 500  | 0          |
| Apr 14 | 3307 | 15         | 2740 | 17         | 67  | -2         | 500  | 0          |
| Apr 15 | 3373 | 66         | 2778 | 38         | 69  | 2          | 526  | 26         |
| Apr 16 | 3444 | 71         | 2823 | 45         | 69  | 0          | 552  | 26         |
| Apr 17 | 3480 | 36         | 2829 | 6          | 72  | 3          | 579  | 27         |
| Apr 18 | 3537 | 57         | 2864 | 35         | 72  | 0          | 601  | 22         |
| Apr 19 | 3550 | 13         | 2850 | -14        | 73  | 1          | 627  | 26         |
| Apr 20 | 3558 | 8          | 2846 | -4         | 75  | 2          | 637  | 10         |
| Apr 21 | 3618 | 60         | 2870 | 24         | 78  | 3          | 670  | 33         |
| Apr 22 | 3654 | 36         | 2863 | -7         | 80  | 2          | 711  | 41         |
| Apr 23 | 3665 | 11         | 2854 | -9         | 83  | 3          | 728  | 17         |
| Apr 24 | 3695 | 30         | 603  | -2251      | 85  | 2          | 3007 | 2279       |
| Apr 25 | 3711 | 16         | 538  | -65        | 85  | 0          | 3088 | 81         |
| Apr 26 | 3723 | 12         | 531  | -7         | 88  | 3          | 3104 | 16         |

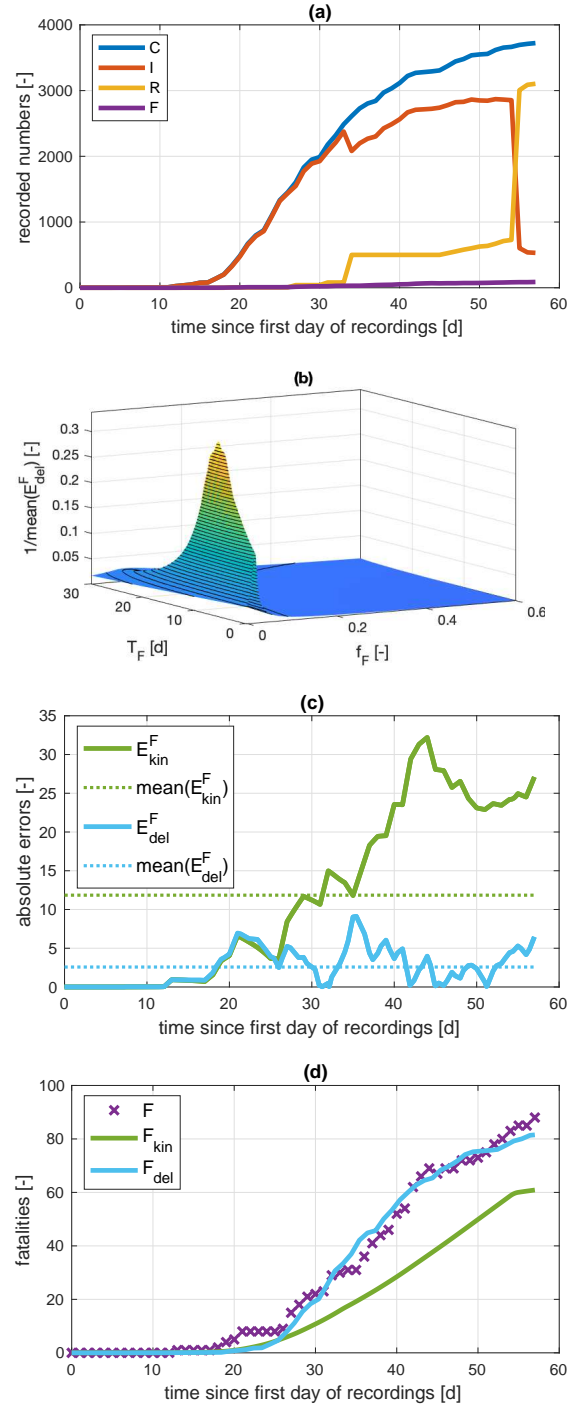

Figure 32: (a) Recorded data, (b) results of optimization based on infection-to-death delay rule, (c) absolute errors based on optimized parameter estimates, and (d) comparison between model-predicted fatalities based on optimized parameter estimates and recorded fatalities for Luxembourg

Table 33: Data recorded in Malaysia

| Date   | C    | $\Delta C$ | I    | $\Delta I$ | F  | $\Delta F$ | R    | $\Delta R$ |
|--------|------|------------|------|------------|----|------------|------|------------|
| Feb 15 | 22   | 22         | 15   | 15         | 0  | 0          | 7    | 7          |
| Feb 16 | 22   | 0          | 14   | -1         | 0  | 0          | 8    | 1          |
| Feb 17 | 22   | 0          | 13   | -1         | 0  | 0          | 9    | 1          |
| Feb 18 | 22   | 0          | 11   | -2         | 0  | 0          | 11   | 2          |
| Feb 19 | 22   | 0          | 7    | -4         | 0  | 0          | 15   | 4          |
| Feb 20 | 22   | 0          | 5    | -2         | 0  | 0          | 17   | 2          |
| Feb 21 | 22   | 0          | 5    | 0          | 0  | 0          | 17   | 0          |
| Feb 22 | 22   | 0          | 5    | 0          | 0  | 0          | 17   | 0          |
| Feb 23 | 22   | 0          | 4    | -1         | 0  | 0          | 18   | 1          |
| Feb 24 | 22   | 0          | 5    | 1          | 0  | 0          | 17   | -1         |
| Feb 25 | 22   | 0          | 2    | -3         | 0  | 0          | 20   | 3          |
| Feb 26 | 22   | 0          | 2    | 0          | 0  | 0          | 20   | 0          |
| Feb 27 | 22   | 0          | 2    | 0          | 0  | 0          | 20   | 0          |
| Feb 28 | 25   | 3          | 5    | 3          | 0  | 0          | 20   | 0          |
| Feb 29 | 25   | 0          | 5    | 0          | 0  | 0          | 20   | 0          |
| Mar 1  | 29   | 4          | 7    | 2          | 0  | 0          | 22   | 2          |
| Mar 2  | 29   | 0          | 7    | 0          | 0  | 0          | 22   | 0          |
| Mar 3  | 36   | 7          | 14   | 7          | 0  | 0          | 22   | 0          |
| Mar 4  | 50   | 14         | 28   | 14         | 0  | 0          | 22   | 0          |
| Mar 5  | 55   | 5          | 33   | 5          | 0  | 0          | 22   | 0          |
| Mar 6  | 83   | 28         | 60   | 27         | 0  | 0          | 23   | 1          |
| Mar 7  | 93   | 10         | 70   | 10         | 0  | 0          | 23   | 0          |
| Mar 8  | 99   | 6          | 75   | 5          | 0  | 0          | 24   | 1          |
| Mar 9  | 117  | 18         | 93   | 18         | 0  | 0          | 24   | 0          |
| Mar 10 | 129  | 12         | 42   | -51        | 0  | 0          | 87   | 63         |
| Mar 11 | 149  | 20         | 123  | 81         | 0  | 0          | 26   | -61        |
| Mar 12 | 158  | 9          | 132  | 9          | 0  | 0          | 26   | 0          |
| Mar 13 | 197  | 39         | 165  | 33         | 0  | 0          | 32   | 6          |
| Mar 14 | 238  | 41         | 203  | 38         | 0  | 0          | 35   | 3          |
| Mar 15 | 428  | 190        | 386  | 183        | 0  | 0          | 42   | 7          |
| Mar 16 | 566  | 138        | 524  | 138        | 0  | 0          | 42   | 0          |
| Mar 17 | 673  | 107        | 622  | 98         | 2  | 2          | 49   | 7          |
| Mar 18 | 790  | 117        | 728  | 106        | 2  | 0          | 60   | 11         |
| Mar 19 | 900  | 110        | 823  | 95         | 2  | 0          | 75   | 15         |
| Mar 20 | 1030 | 130        | 940  | 117        | 3  | 1          | 87   | 12         |
| Mar 21 | 1183 | 153        | 1061 | 121        | 8  | 5          | 114  | 27         |
| Mar 22 | 1306 | 123        | 1157 | 96         | 10 | 2          | 139  | 25         |
| Mar 23 | 1518 | 212        | 1345 | 188        | 14 | 4          | 159  | 20         |
| Mar 24 | 1624 | 106        | 1425 | 80         | 16 | 2          | 183  | 24         |
| Mar 25 | 1796 | 172        | 1577 | 152        | 20 | 4          | 199  | 16         |
| Mar 26 | 2031 | 235        | 1793 | 216        | 23 | 3          | 215  | 16         |
| Mar 27 | 2161 | 130        | 1876 | 83         | 26 | 3          | 259  | 44         |
| Mar 28 | 2320 | 159        | 1973 | 97         | 27 | 1          | 320  | 61         |
| Mar 29 | 2470 | 150        | 2047 | 74         | 35 | 8          | 388  | 68         |
| Mar 30 | 2626 | 156        | 2110 | 63         | 37 | 2          | 479  | 91         |
| Mar 31 | 2766 | 140        | 2186 | 76         | 43 | 6          | 537  | 58         |
| Apr 1  | 2908 | 142        | 2218 | 32         | 45 | 2          | 645  | 108        |
| Apr 2  | 3116 | 208        | 2299 | 81         | 50 | 5          | 767  | 122        |
| Apr 3  | 3333 | 217        | 2453 | 154        | 53 | 3          | 827  | 60         |
| Apr 4  | 3483 | 150        | 2511 | 58         | 57 | 4          | 915  | 88         |
| Apr 5  | 3662 | 179        | 2596 | 85         | 61 | 4          | 1005 | 90         |
| Apr 6  | 3793 | 131        | 2490 | -106       | 62 | 1          | 1241 | 236        |
| Apr 7  | 3963 | 170        | 2579 | 89         | 63 | 1          | 1321 | 80         |
| Apr 8  | 4119 | 156        | 2567 | -12        | 65 | 2          | 1487 | 166        |
| Apr 9  | 4228 | 109        | 2553 | -14        | 67 | 2          | 1608 | 121        |
| Apr 10 | 4346 | 118        | 2446 | -107       | 70 | 3          | 1830 | 222        |
| Apr 11 | 4530 | 184        | 2462 | 16         | 73 | 3          | 1995 | 165        |
| Apr 12 | 4683 | 153        | 2499 | 37         | 76 | 3          | 2108 | 113        |
| Apr 13 | 4817 | 134        | 2464 | -35        | 77 | 1          | 2276 | 168        |
| Apr 14 | 4987 | 170        | 2427 | -37        | 82 | 5          | 2478 | 202        |
| Apr 15 | 5072 | 85         | 2342 | -85        | 83 | 1          | 2647 | 169        |
| Apr 16 | 5182 | 110        | 2332 | -10        | 84 | 1          | 2766 | 119        |
| Apr 17 | 5251 | 69         | 2198 | -134       | 86 | 2          | 2967 | 201        |
| Apr 18 | 5305 | 54         | 2115 | -83        | 88 | 2          | 3102 | 135        |
| Apr 19 | 5389 | 84         | 2103 | -12        | 89 | 1          | 3197 | 95         |
| Apr 20 | 5425 | 36         | 2041 | -62        | 89 | 0          | 3295 | 98         |
| Apr 21 | 5482 | 57         | 2041 | 0          | 92 | 3          | 3349 | 54         |
| Apr 22 | 5532 | 50         | 1987 | -54        | 93 | 1          | 3452 | 103        |
| Apr 23 | 5603 | 71         | 1966 | -21        | 95 | 2          | 3542 | 90         |
| Apr 24 | 5691 | 88         | 1932 | -34        | 96 | 1          | 3663 | 121        |
| Apr 25 | 5742 | 51         | 1882 | -50        | 98 | 2          | 3762 | 99         |
| Apr 26 | 5780 | 38         | 1820 | -62        | 98 | 0          | 3862 | 100        |

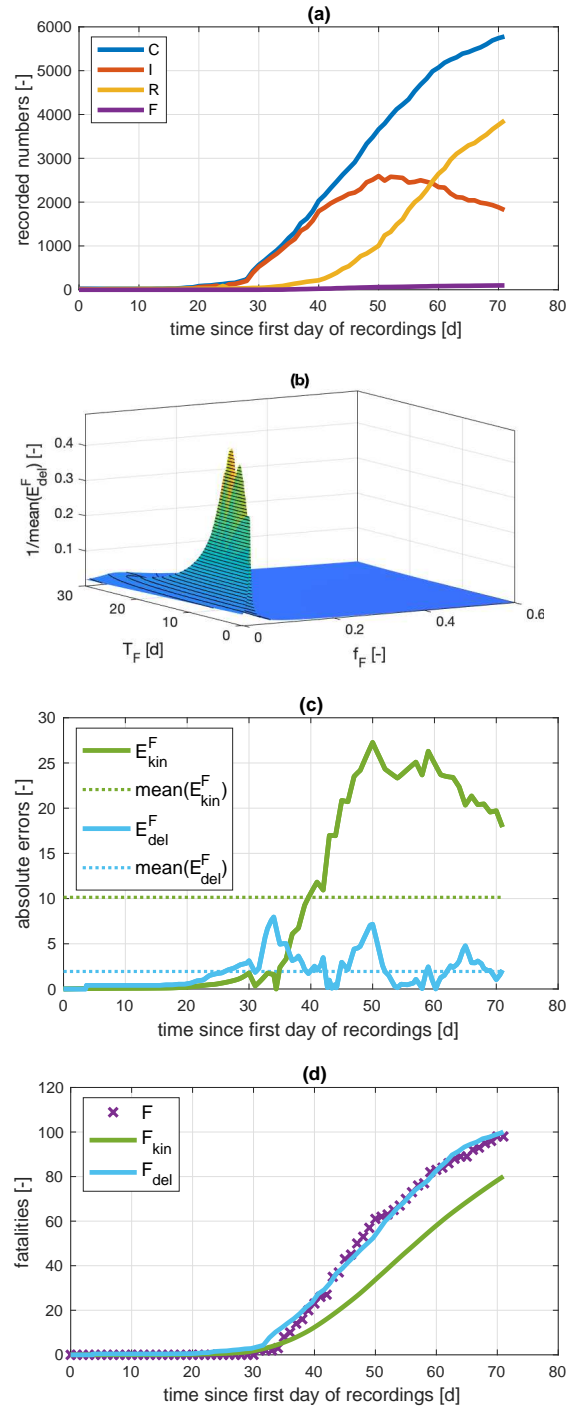

Figure 33: (a) Recorded data, (b) results of optimization based on infection-to-death delay rule, (c) absolute errors based on optimized parameter estimates, and (d) comparison between model-predicted fatalities based on optimized parameter estimates and recorded fatalities for Malaysia

Table 34: Data recorded in Mexico

| Date   | $C$   | $\Delta C$ | $I$  | $\Delta I$ | $F$  | $\Delta F$ | $R$  | $\Delta R$ |
|--------|-------|------------|------|------------|------|------------|------|------------|
| Feb 28 | 2     | 2          | 2    | 2          | 0    | 0          | 0    | 0          |
| Feb 29 | 4     | 2          | 4    | 2          | 0    | 0          | 0    | 0          |
| Mar 1  | 5     | 1          | 5    | 1          | 0    | 0          | 0    | 0          |
| Mar 2  | 6     | 1          | 6    | 1          | 0    | 0          | 0    | 0          |
| Mar 3  | 6     | 0          | 5    | -1         | 0    | 0          | 1    | 1          |
| Mar 4  | 6     | 0          | 5    | 0          | 0    | 0          | 1    | 0          |
| Mar 5  | 6     | 0          | 5    | 0          | 0    | 0          | 1    | 0          |
| Mar 6  | 6     | 0          | 5    | 0          | 0    | 0          | 1    | 0          |
| Mar 7  | 6     | 0          | 5    | 0          | 0    | 0          | 1    | 0          |
| Mar 8  | 7     | 1          | 6    | 1          | 0    | 0          | 1    | 0          |
| Mar 9  | 7     | 0          | 3    | -3         | 0    | 0          | 4    | 3          |
| Mar 10 | 7     | 0          | 3    | 0          | 0    | 0          | 4    | 0          |
| Mar 11 | 11    | 4          | 7    | 4          | 0    | 0          | 4    | 0          |
| Mar 12 | 12    | 1          | 8    | 1          | 0    | 0          | 4    | 0          |
| Mar 13 | 15    | 3          | 11   | 3          | 0    | 0          | 4    | 0          |
| Mar 14 | 26    | 11         | 22   | 11         | 0    | 0          | 4    | 0          |
| Mar 15 | 43    | 17         | 39   | 17         | 0    | 0          | 4    | 0          |
| Mar 16 | 53    | 10         | 49   | 10         | 0    | 0          | 4    | 0          |
| Mar 17 | 82    | 29         | 78   | 29         | 0    | 0          | 4    | 0          |
| Mar 18 | 93    | 11         | 89   | 11         | 0    | 0          | 4    | 0          |
| Mar 19 | 118   | 25         | 113  | 24         | 1    | 1          | 4    | 0          |
| Mar 20 | 164   | 46         | 159  | 46         | 1    | 0          | 4    | 0          |
| Mar 21 | 203   | 39         | 197  | 38         | 2    | 1          | 4    | 0          |
| Mar 22 | 251   | 48         | 245  | 48         | 2    | 0          | 4    | 0          |
| Mar 23 | 316   | 65         | 309  | 64         | 3    | 1          | 4    | 0          |
| Mar 24 | 367   | 51         | 359  | 50         | 4    | 1          | 4    | 0          |
| Mar 25 | 405   | 38         | 396  | 37         | 5    | 1          | 4    | 0          |
| Mar 26 | 475   | 70         | 465  | 69         | 6    | 1          | 4    | 0          |
| Mar 27 | 585   | 110        | 573  | 108        | 8    | 2          | 4    | 0          |
| Mar 28 | 717   | 132        | 701  | 128        | 12   | 4          | 4    | 0          |
| Mar 29 | 848   | 131        | 797  | 96         | 16   | 4          | 35   | 31         |
| Mar 30 | 993   | 145        | 938  | 141        | 20   | 4          | 35   | 0          |
| Mar 31 | 1094  | 101        | 1031 | 93         | 28   | 8          | 35   | 0          |
| Apr 1  | 1215  | 121        | 1151 | 120        | 29   | 1          | 35   | 0          |
| Apr 2  | 1378  | 163        | 1306 | 155        | 37   | 8          | 35   | 0          |
| Apr 3  | 1510  | 132        | 827  | -479       | 50   | 13         | 633  | 598        |
| Apr 4  | 1688  | 178        | 995  | 168        | 60   | 10         | 633  | 0          |
| Apr 5  | 1890  | 202        | 1178 | 183        | 79   | 19         | 633  | 0          |
| Apr 6  | 2143  | 253        | 1416 | 238        | 94   | 15         | 633  | 0          |
| Apr 7  | 2439  | 296        | 1681 | 265        | 125  | 31         | 633  | 0          |
| Apr 8  | 2785  | 346        | 2011 | 330        | 141  | 16         | 633  | 0          |
| Apr 9  | 3181  | 396        | 2374 | 363        | 174  | 33         | 633  | 0          |
| Apr 10 | 3441  | 260        | 2614 | 240        | 194  | 20         | 633  | 0          |
| Apr 11 | 3844  | 403        | 2978 | 364        | 233  | 39         | 633  | 0          |
| Apr 12 | 4219  | 375        | 2174 | -804       | 273  | 40         | 1772 | 1139       |
| Apr 13 | 4661  | 442        | 2522 | 348        | 296  | 23         | 1843 | 71         |
| Apr 14 | 5014  | 353        | 2718 | 196        | 332  | 36         | 1964 | 121        |
| Apr 15 | 5399  | 385        | 2868 | 150        | 406  | 74         | 2125 | 161        |
| Apr 16 | 5847  | 448        | 3273 | 405        | 449  | 43         | 2125 | 0          |
| Apr 17 | 6297  | 450        | 3686 | 413        | 486  | 37         | 2125 | 0          |
| Apr 18 | 6875  | 578        | 4204 | 518        | 546  | 60         | 2125 | 0          |
| Apr 19 | 7497  | 622        | 4220 | 16         | 650  | 104        | 2627 | 502        |
| Apr 20 | 8261  | 764        | 4948 | 728        | 686  | 36         | 2627 | 0          |
| Apr 21 | 8772  | 511        | 5433 | 485        | 712  | 26         | 2627 | 0          |
| Apr 22 | 9501  | 729        | 6017 | 584        | 857  | 145        | 2627 | 0          |
| Apr 23 | 10544 | 1043       | 6947 | 930        | 970  | 113        | 2627 | 0          |
| Apr 24 | 11633 | 1089       | 7937 | 990        | 1069 | 99         | 2627 | 0          |
| Apr 25 | 12872 | 1239       | 4502 | -3435      | 1221 | 152        | 7149 | 4522       |
| Apr 26 | 13842 | 970        | 5388 | 886        | 1305 | 84         | 7149 | 0          |

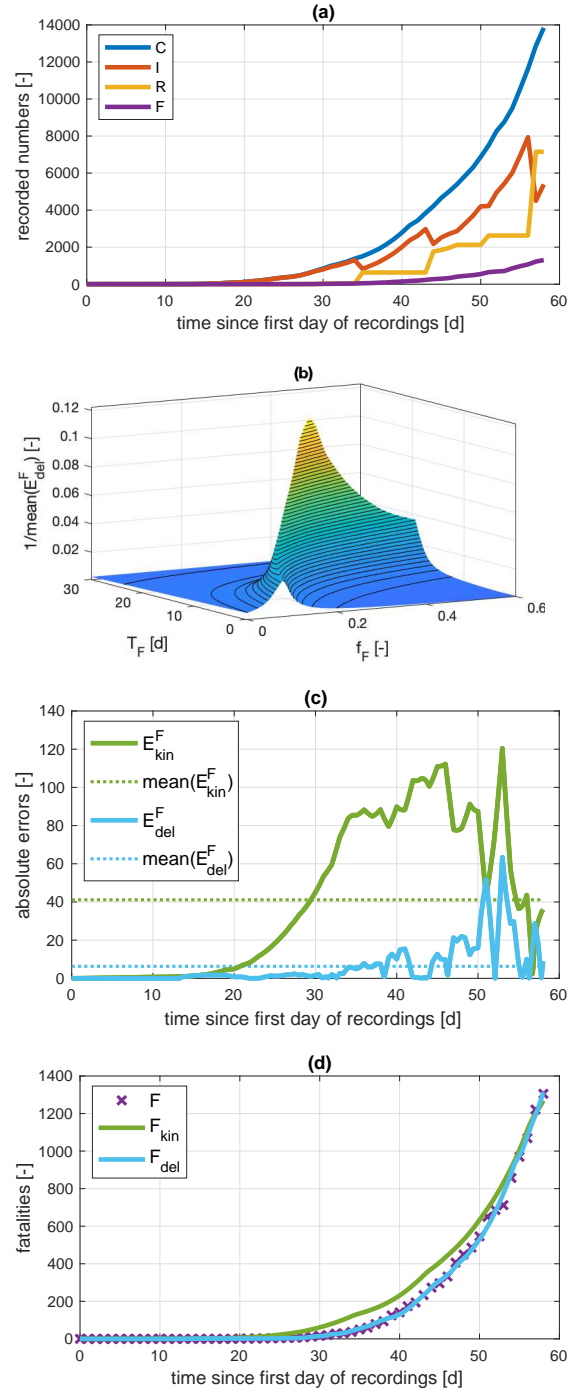

Figure 34: (a) Recorded data, (b) results of optimization based on infection-to-death delay rule, (c) absolute errors based on optimized parameter estimates, and (d) comparison between model-predicted fatalities based on optimized parameter estimates and recorded fatalities for Mexico



Table 35: Data recorded in Morocco

| Date   | $C$  | $\Delta C$ | $I$  | $\Delta I$ | $F$ | $\Delta F$ | $R$ | $\Delta R$ |
|--------|------|------------|------|------------|-----|------------|-----|------------|
| Mar 2  | 1    | 1          | 1    | 1          | 0   | 0          | 0   | 0          |
| Mar 3  | 1    | 0          | 1    | 0          | 0   | 0          | 0   | 0          |
| Mar 4  | 1    | 0          | 1    | 0          | 0   | 0          | 0   | 0          |
| Mar 5  | 2    | 1          | 2    | 1          | 0   | 0          | 0   | 0          |
| Mar 6  | 2    | 0          | 2    | 0          | 0   | 0          | 0   | 0          |
| Mar 7  | 2    | 0          | 2    | 0          | 0   | 0          | 0   | 0          |
| Mar 8  | 2    | 0          | 2    | 0          | 0   | 0          | 0   | 0          |
| Mar 9  | 2    | 0          | 2    | 0          | 0   | 0          | 0   | 0          |
| Mar 10 | 3    | 1          | 2    | 0          | 1   | 1          | 0   | 0          |
| Mar 11 | 6    | 3          | 5    | 3          | 1   | 0          | 0   | 0          |
| Mar 12 | 6    | 0          | 5    | 0          | 1   | 0          | 0   | 0          |
| Mar 13 | 7    | 1          | 5    | 0          | 1   | 0          | 1   | 1          |
| Mar 14 | 18   | 11         | 16   | 11         | 1   | 0          | 1   | 0          |
| Mar 15 | 28   | 10         | 26   | 10         | 1   | 0          | 1   | 0          |
| Mar 16 | 37   | 9          | 35   | 9          | 1   | 0          | 1   | 0          |
| Mar 17 | 44   | 7          | 41   | 6          | 2   | 1          | 1   | 0          |
| Mar 18 | 54   | 10         | 51   | 10         | 2   | 0          | 1   | 0          |
| Mar 19 | 63   | 9          | 59   | 8          | 2   | 0          | 2   | 1          |
| Mar 20 | 86   | 23         | 81   | 22         | 3   | 1          | 2   | 0          |
| Mar 21 | 96   | 10         | 90   | 9          | 3   | 0          | 3   | 1          |
| Mar 22 | 115  | 19         | 108  | 18         | 4   | 1          | 3   | 0          |
| Mar 23 | 143  | 28         | 134  | 26         | 4   | 0          | 5   | 2          |
| Mar 24 | 170  | 27         | 159  | 25         | 5   | 1          | 6   | 1          |
| Mar 25 | 225  | 55         | 212  | 53         | 6   | 1          | 7   | 1          |
| Mar 26 | 275  | 50         | 256  | 44         | 11  | 5          | 8   | 1          |
| Mar 27 | 345  | 70         | 311  | 55         | 23  | 12         | 11  | 3          |
| Mar 28 | 402  | 57         | 365  | 54         | 25  | 2          | 12  | 1          |
| Mar 29 | 479  | 77         | 440  | 75         | 26  | 1          | 13  | 1          |
| Mar 30 | 556  | 77         | 508  | 68         | 33  | 7          | 15  | 2          |
| Mar 31 | 617  | 61         | 557  | 49         | 36  | 3          | 24  | 9          |
| Apr 1  | 654  | 37         | 586  | 29         | 39  | 3          | 29  | 5          |
| Apr 2  | 708  | 54         | 633  | 47         | 44  | 5          | 31  | 2          |
| Apr 3  | 791  | 83         | 686  | 53         | 48  | 4          | 57  | 26         |
| Apr 4  | 919  | 128        | 794  | 108        | 59  | 11         | 66  | 9          |
| Apr 5  | 1021 | 102        | 875  | 81         | 70  | 11         | 76  | 10         |
| Apr 6  | 1120 | 99         | 959  | 84         | 80  | 10         | 81  | 5          |
| Apr 7  | 1184 | 64         | 1001 | 42         | 90  | 10         | 93  | 12         |
| Apr 8  | 1275 | 91         | 1085 | 84         | 93  | 3          | 97  | 4          |
| Apr 9  | 1374 | 99         | 1168 | 83         | 97  | 4          | 109 | 12         |
| Apr 10 | 1448 | 74         | 1219 | 51         | 107 | 10         | 122 | 13         |
| Apr 11 | 1545 | 97         | 1288 | 69         | 111 | 4          | 146 | 24         |
| Apr 12 | 1661 | 116        | 1366 | 78         | 118 | 7          | 177 | 31         |
| Apr 13 | 1763 | 102        | 1434 | 68         | 126 | 8          | 203 | 26         |
| Apr 14 | 1888 | 125        | 1545 | 111        | 126 | 0          | 217 | 14         |
| Apr 15 | 2024 | 136        | 1668 | 123        | 127 | 1          | 229 | 12         |
| Apr 16 | 2283 | 259        | 1904 | 236        | 130 | 3          | 249 | 20         |
| Apr 17 | 2564 | 281        | 2148 | 244        | 135 | 5          | 281 | 32         |
| Apr 18 | 2685 | 121        | 2234 | 86         | 137 | 2          | 314 | 33         |
| Apr 19 | 2855 | 170        | 2387 | 153        | 141 | 4          | 327 | 13         |
| Apr 20 | 3046 | 191        | 2553 | 166        | 143 | 2          | 350 | 23         |
| Apr 21 | 3209 | 163        | 2671 | 118        | 145 | 2          | 393 | 43         |
| Apr 22 | 3446 | 237        | 2880 | 209        | 149 | 4          | 417 | 24         |
| Apr 23 | 3568 | 122        | 2957 | 77         | 155 | 6          | 456 | 39         |
| Apr 24 | 3758 | 190        | 3114 | 157        | 158 | 3          | 486 | 30         |
| Apr 25 | 3897 | 139        | 3201 | 87         | 159 | 1          | 537 | 51         |
| Apr 26 | 4065 | 168        | 3311 | 110        | 161 | 2          | 593 | 56         |

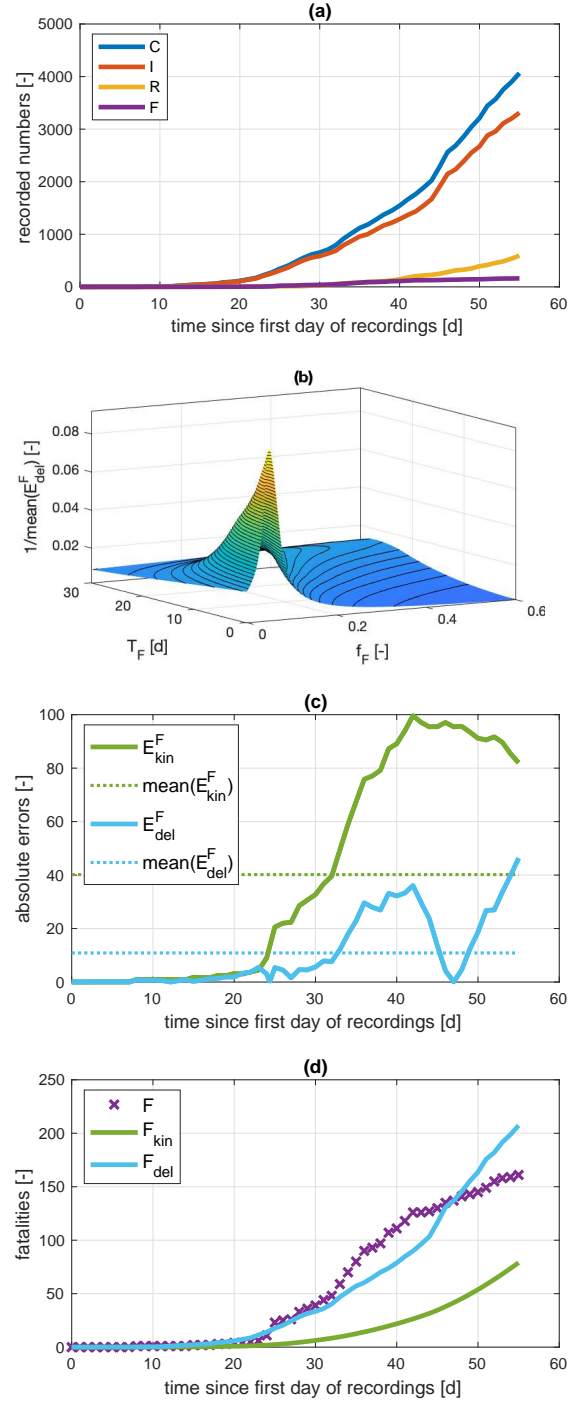

Figure 35: (a) Recorded data, (b) results of optimization based on infection-to-death delay rule, (c) absolute errors based on optimized parameter estimates, and (d) comparison between model-predicted fatalities based on optimized parameter estimates and recorded fatalities for Morocco



Table 36: Data recorded in Netherlands

| Date   | C     | $\Delta C$ | I     | $\Delta I$ | F    | $\Delta F$ | R   | $\Delta R$ |
|--------|-------|------------|-------|------------|------|------------|-----|------------|
| Feb 27 | 1     | 1          | 1     | 1          | 0    | 0          | 0   | 0          |
| Feb 28 | 2     | 1          | 2     | 1          | 0    | 0          | 0   | 0          |
| Feb 29 | 7     | 5          | 7     | 5          | 0    | 0          | 0   | 0          |
| Mar 1  | 10    | 3          | 10    | 3          | 0    | 0          | 0   | 0          |
| Mar 2  | 18    | 8          | 18    | 8          | 0    | 0          | 0   | 0          |
| Mar 3  | 23    | 5          | 23    | 5          | 0    | 0          | 0   | 0          |
| Mar 4  | 38    | 15         | 38    | 15         | 0    | 0          | 0   | 0          |
| Mar 5  | 82    | 44         | 82    | 44         | 0    | 0          | 0   | 0          |
| Mar 6  | 128   | 46         | 127   | 45         | 1    | 1          | 0   | 0          |
| Mar 7  | 188   | 60         | 187   | 60         | 1    | 0          | 0   | 0          |
| Mar 8  | 265   | 77         | 262   | 75         | 3    | 2          | 0   | 0          |
| Mar 9  | 321   | 56         | 317   | 55         | 4    | 1          | 0   | 0          |
| Mar 10 | 382   | 61         | 378   | 61         | 4    | 0          | 0   | 0          |
| Mar 11 | 503   | 121        | 498   | 120        | 5    | 1          | 0   | 0          |
| Mar 12 | 614   | 111        | 607   | 109        | 5    | 0          | 2   | 2          |
| Mar 13 | 804   | 190        | 792   | 185        | 10   | 5          | 2   | 0          |
| Mar 14 | 959   | 155        | 945   | 153        | 12   | 2          | 2   | 0          |
| Mar 15 | 1135  | 176        | 1113  | 168        | 20   | 8          | 2   | 0          |
| Mar 16 | 1413  | 278        | 1387  | 274        | 24   | 4          | 2   | 0          |
| Mar 17 | 1705  | 292        | 1660  | 273        | 43   | 19         | 2   | 0          |
| Mar 18 | 2051  | 346        | 1991  | 331        | 58   | 15         | 2   | 0          |
| Mar 19 | 2460  | 409        | 2382  | 391        | 76   | 18         | 2   | 0          |
| Mar 20 | 2994  | 534        | 2886  | 504        | 106  | 30         | 2   | 0          |
| Mar 21 | 3631  | 637        | 3493  | 607        | 136  | 30         | 2   | 0          |
| Mar 22 | 4204  | 573        | 4023  | 530        | 179  | 43         | 2   | 0          |
| Mar 23 | 4749  | 545        | 4534  | 511        | 213  | 34         | 2   | 0          |
| Mar 24 | 5560  | 811        | 5282  | 748        | 276  | 63         | 2   | 0          |
| Mar 25 | 6412  | 852        | 6053  | 771        | 356  | 80         | 3   | 1          |
| Mar 26 | 7431  | 1019       | 6994  | 941        | 434  | 78         | 3   | 0          |
| Mar 27 | 8603  | 1172       | 8054  | 1060       | 546  | 112        | 3   | 0          |
| Mar 28 | 9762  | 1159       | 9120  | 1066       | 639  | 93         | 3   | 0          |
| Mar 29 | 10866 | 1104       | 9845  | 725        | 771  | 132        | 250 | 247        |
| Mar 30 | 11750 | 884        | 10636 | 791        | 864  | 93         | 250 | 0          |
| Mar 31 | 12595 | 845        | 11306 | 670        | 1039 | 175        | 250 | 0          |
| Apr 1  | 13614 | 1019       | 12191 | 885        | 1173 | 134        | 250 | 0          |
| Apr 2  | 14697 | 1083       | 13108 | 917        | 1339 | 166        | 250 | 0          |
| Apr 3  | 15723 | 1026       | 13986 | 878        | 1487 | 148        | 250 | 0          |
| Apr 4  | 16627 | 904        | 14726 | 740        | 1651 | 164        | 250 | 0          |
| Apr 5  | 17851 | 1224       | 15835 | 1109       | 1766 | 115        | 250 | 0          |
| Apr 6  | 18803 | 952        | 16686 | 851        | 1867 | 101        | 250 | 0          |
| Apr 7  | 19580 | 777        | 17229 | 543        | 2101 | 234        | 250 | 0          |
| Apr 8  | 20549 | 969        | 18051 | 822        | 2248 | 147        | 250 | 0          |
| Apr 9  | 21762 | 1213       | 19116 | 1065       | 2396 | 148        | 250 | 0          |
| Apr 10 | 23097 | 1335       | 20336 | 1220       | 2511 | 115        | 250 | 0          |
| Apr 11 | 24413 | 1316       | 21520 | 1184       | 2643 | 132        | 250 | 0          |
| Apr 12 | 25587 | 1174       | 22600 | 1080       | 2737 | 94         | 250 | 0          |
| Apr 13 | 26551 | 964        | 23478 | 878        | 2823 | 86         | 250 | 0          |
| Apr 14 | 27419 | 868        | 24224 | 746        | 2945 | 122        | 250 | 0          |
| Apr 15 | 28153 | 734        | 24769 | 545        | 3134 | 189        | 250 | 0          |
| Apr 16 | 29214 | 1061       | 25649 | 880        | 3315 | 181        | 250 | 0          |
| Apr 17 | 30449 | 1235       | 26740 | 1091       | 3459 | 144        | 250 | 0          |
| Apr 18 | 31589 | 1140       | 27738 | 998        | 3601 | 142        | 250 | 0          |
| Apr 19 | 32655 | 1066       | 28721 | 983        | 3684 | 83         | 250 | 0          |
| Apr 20 | 33405 | 750        | 29404 | 683        | 3751 | 67         | 250 | 0          |
| Apr 21 | 34134 | 729        | 29968 | 564        | 3916 | 165        | 250 | 0          |
| Apr 22 | 34842 | 708        | 30538 | 570        | 4054 | 138        | 250 | 0          |
| Apr 23 | 35729 | 887        | 31302 | 764        | 4177 | 123        | 250 | 0          |
| Apr 24 | 36535 | 806        | 31996 | 694        | 4289 | 112        | 250 | 0          |
| Apr 25 | 37190 | 655        | 32531 | 535        | 4409 | 120        | 250 | 0          |
| Apr 26 | 37846 | 656        | 33120 | 589        | 4475 | 66         | 251 | 1          |

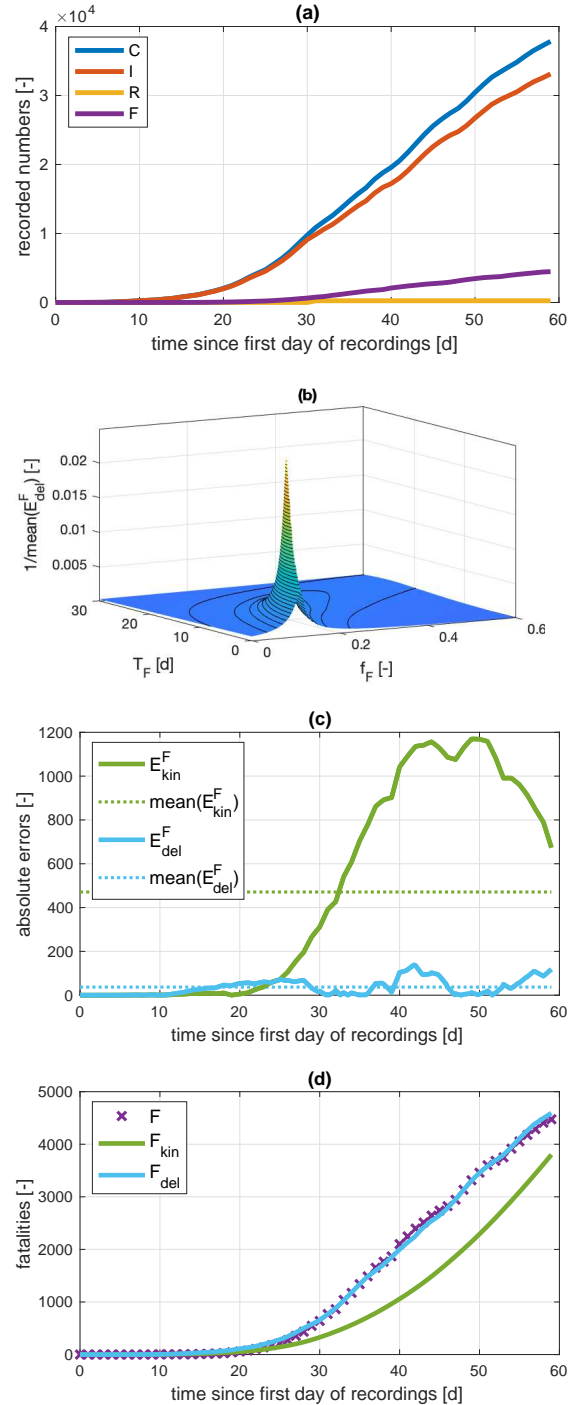

Figure 36: (a) Recorded data, (b) results of optimization based on infection-to-death delay rule, (c) absolute errors based on optimized parameter estimates, and (d) comparison between model-predicted fatalities based on optimized parameter estimates and recorded fatalities for Netherlands

Table 37: Data recorded in New Zealand

| Date   | $C$  | $\Delta C$ | $I$ | $\Delta I$ | $F$ | $\Delta F$ | $R$  | $\Delta R$ |
|--------|------|------------|-----|------------|-----|------------|------|------------|
| Feb 28 | 1    | 1          | 1   | 1          | 0   | 0          | 0    | 0          |
| Feb 29 | 1    | 0          | 1   | 0          | 0   | 0          | 0    | 0          |
| Mar 1  | 1    | 0          | 1   | 0          | 0   | 0          | 0    | 0          |
| Mar 2  | 1    | 0          | 1   | 0          | 0   | 0          | 0    | 0          |
| Mar 3  | 3    | 2          | 2   | 1          | 0   | 0          | 1    | 1          |
| Mar 4  | 3    | 0          | 3   | 1          | 0   | 0          | 0    | -1         |
| Mar 5  | 4    | 1          | 4   | 1          | 0   | 0          | 0    | 0          |
| Mar 6  | 4    | 0          | 4   | 0          | 0   | 0          | 0    | 0          |
| Mar 7  | 5    | 1          | 5   | 1          | 0   | 0          | 0    | 0          |
| Mar 8  | 5    | 0          | 5   | 0          | 0   | 0          | 0    | 0          |
| Mar 9  | 5    | 0          | 5   | 0          | 0   | 0          | 0    | 0          |
| Mar 10 | 5    | 0          | 5   | 0          | 0   | 0          | 0    | 0          |
| Mar 11 | 5    | 0          | 5   | 0          | 0   | 0          | 0    | 0          |
| Mar 12 | 5    | 0          | 5   | 0          | 0   | 0          | 0    | 0          |
| Mar 13 | 6    | 1          | 6   | 1          | 0   | 0          | 0    | 0          |
| Mar 14 | 8    | 2          | 8   | 2          | 0   | 0          | 0    | 0          |
| Mar 15 | 8    | 0          | 8   | 0          | 0   | 0          | 0    | 0          |
| Mar 16 | 8    | 0          | 8   | 0          | 0   | 0          | 0    | 0          |
| Mar 17 | 20   | 12         | 20  | 12         | 0   | 0          | 0    | 0          |
| Mar 18 | 20   | 0          | 20  | 0          | 0   | 0          | 0    | 0          |
| Mar 19 | 28   | 8          | 28  | 8          | 0   | 0          | 0    | 0          |
| Mar 20 | 52   | 24         | 52  | 24         | 0   | 0          | 0    | 0          |
| Mar 21 | 52   | 0          | 52  | 0          | 0   | 0          | 0    | 0          |
| Mar 22 | 102  | 50         | 102 | 50         | 0   | 0          | 0    | 0          |
| Mar 23 | 102  | 0          | 102 | 0          | 0   | 0          | 0    | 0          |
| Mar 24 | 205  | 103        | 183 | 81         | 0   | 0          | 22   | 22         |
| Mar 25 | 283  | 78         | 256 | 73         | 0   | 0          | 27   | 5          |
| Mar 26 | 368  | 85         | 331 | 75         | 0   | 0          | 37   | 10         |
| Mar 27 | 368  | 0          | 331 | 0          | 0   | 0          | 37   | 0          |
| Mar 28 | 514  | 146        | 457 | 126        | 1   | 1          | 56   | 19         |
| Mar 29 | 514  | 0          | 457 | 0          | 1   | 0          | 56   | 0          |
| Mar 30 | 589  | 75         | 525 | 68         | 1   | 0          | 63   | 7          |
| Mar 31 | 647  | 58         | 572 | 47         | 1   | 0          | 74   | 11         |
| Apr 1  | 708  | 61         | 624 | 52         | 1   | 0          | 83   | 9          |
| Apr 2  | 797  | 89         | 704 | 80         | 1   | 0          | 92   | 9          |
| Apr 3  | 868  | 71         | 764 | 60         | 1   | 0          | 103  | 11         |
| Apr 4  | 950  | 82         | 822 | 58         | 1   | 0          | 127  | 24         |
| Apr 5  | 1039 | 89         | 882 | 60         | 1   | 0          | 156  | 29         |
| Apr 6  | 1106 | 67         | 929 | 47         | 1   | 0          | 176  | 20         |
| Apr 7  | 1160 | 54         | 918 | -11        | 1   | 0          | 241  | 65         |
| Apr 8  | 1210 | 50         | 927 | 9          | 1   | 0          | 282  | 41         |
| Apr 9  | 1239 | 29         | 921 | -6         | 1   | 0          | 317  | 35         |
| Apr 10 | 1283 | 44         | 908 | -13        | 2   | 1          | 373  | 56         |
| Apr 11 | 1312 | 29         | 886 | -22        | 4   | 2          | 422  | 49         |
| Apr 12 | 1330 | 18         | 855 | -31        | 4   | 0          | 471  | 49         |
| Apr 13 | 1349 | 19         | 798 | -57        | 5   | 1          | 546  | 75         |
| Apr 14 | 1366 | 17         | 729 | -69        | 9   | 4          | 628  | 82         |
| Apr 15 | 1386 | 20         | 649 | -80        | 9   | 0          | 728  | 100        |
| Apr 16 | 1401 | 15         | 622 | -27        | 9   | 0          | 770  | 42         |
| Apr 17 | 1409 | 8          | 582 | -40        | 11  | 2          | 816  | 46         |
| Apr 18 | 1422 | 13         | 544 | -38        | 11  | 0          | 867  | 51         |
| Apr 19 | 1431 | 9          | 507 | -37        | 12  | 1          | 912  | 45         |
| Apr 20 | 1440 | 9          | 545 | 38         | 12  | 0          | 883  | -29        |
| Apr 21 | 1445 | 5          | 426 | -119       | 13  | 1          | 1006 | 123        |
| Apr 22 | 1448 | 3          | 398 | -28        | 14  | 1          | 1036 | 30         |
| Apr 23 | 1451 | 3          | 370 | -28        | 16  | 2          | 1065 | 29         |
| Apr 24 | 1456 | 5          | 344 | -26        | 17  | 1          | 1095 | 30         |
| Apr 25 | 1461 | 5          | 325 | -19        | 18  | 1          | 1118 | 23         |
| Apr 26 | 1469 | 8          | 309 | -16        | 18  | 0          | 1142 | 24         |

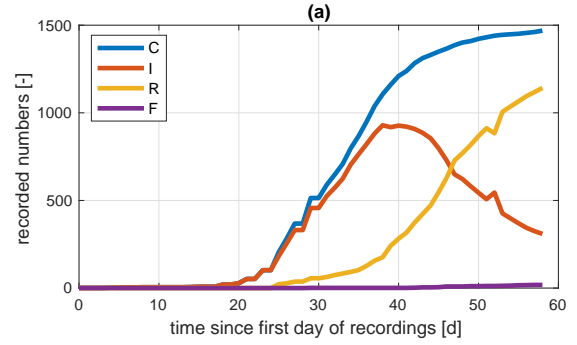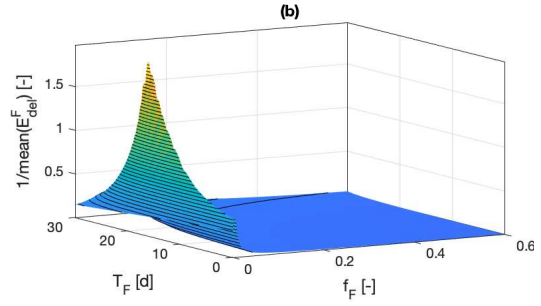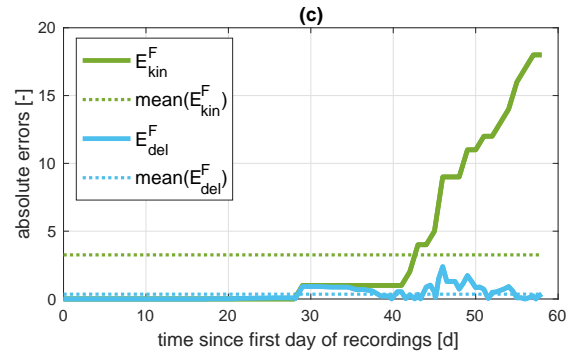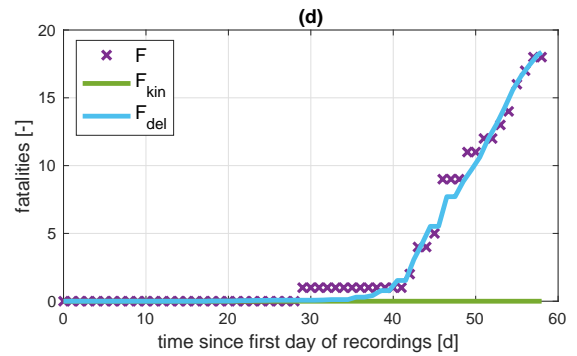

Figure 37: (a) Recorded data, (b) results of optimization based on infection-to-death delay rule, (c) absolute errors based on optimized parameter estimates, and (d) comparison between model-predicted fatalities based on optimized parameter estimates and recorded fatalities for New Zealand

Table 38: Data recorded in Norway

| Date   | $C$  | $\Delta C$ | $I$  | $\Delta I$ | $F$ | $\Delta F$ | $R$ | $\Delta R$ |
|--------|------|------------|------|------------|-----|------------|-----|------------|
| Feb 26 | 1    | 1          | 1    | 1          | 0   | 0          | 0   | 0          |
| Feb 27 | 4    | 3          | 4    | 3          | 0   | 0          | 0   | 0          |
| Feb 28 | 6    | 2          | 6    | 2          | 0   | 0          | 0   | 0          |
| Feb 29 | 15   | 9          | 15   | 9          | 0   | 0          | 0   | 0          |
| Mar 1  | 19   | 4          | 19   | 4          | 0   | 0          | 0   | 0          |
| Mar 2  | 25   | 6          | 25   | 6          | 0   | 0          | 0   | 0          |
| Mar 3  | 33   | 8          | 33   | 8          | 0   | 0          | 0   | 0          |
| Mar 4  | 59   | 26         | 59   | 26         | 0   | 0          | 0   | 0          |
| Mar 5  | 94   | 35         | 94   | 35         | 0   | 0          | 0   | 0          |
| Mar 6  | 127  | 33         | 126  | 32         | 0   | 0          | 1   | 1          |
| Mar 7  | 156  | 29         | 156  | 30         | 0   | 0          | 0   | -1         |
| Mar 8  | 176  | 20         | 175  | 19         | 0   | 0          | 1   | 1          |
| Mar 9  | 227  | 51         | 226  | 51         | 0   | 0          | 1   | 0          |
| Mar 10 | 400  | 173        | 399  | 173        | 0   | 0          | 1   | 0          |
| Mar 11 | 629  | 229        | 628  | 229        | 0   | 0          | 1   | 0          |
| Mar 12 | 800  | 171        | 798  | 170        | 1   | 1          | 1   | 0          |
| Mar 13 | 996  | 196        | 994  | 196        | 1   | 0          | 1   | 0          |
| Mar 14 | 1109 | 113        | 1105 | 111        | 3   | 2          | 1   | 0          |
| Mar 15 | 1256 | 147        | 1252 | 147        | 3   | 0          | 1   | 0          |
| Mar 16 | 1348 | 92         | 1344 | 92         | 3   | 0          | 1   | 0          |
| Mar 17 | 1471 | 123        | 1467 | 123        | 3   | 0          | 1   | 0          |
| Mar 18 | 1591 | 120        | 1584 | 117        | 6   | 3          | 1   | 0          |
| Mar 19 | 1790 | 199        | 1782 | 198        | 7   | 1          | 1   | 0          |
| Mar 20 | 1959 | 169        | 1951 | 169        | 7   | 0          | 1   | 0          |
| Mar 21 | 2164 | 205        | 2151 | 200        | 7   | 0          | 6   | 5          |
| Mar 22 | 2385 | 221        | 2372 | 221        | 7   | 0          | 6   | 0          |
| Mar 23 | 2625 | 240        | 2609 | 237        | 10  | 3          | 6   | 0          |
| Mar 24 | 2866 | 241        | 2848 | 239        | 12  | 2          | 6   | 0          |
| Mar 25 | 3084 | 218        | 3064 | 216        | 14  | 2          | 6   | 0          |
| Mar 26 | 3372 | 288        | 3352 | 288        | 14  | 0          | 6   | 0          |
| Mar 27 | 3771 | 399        | 3745 | 393        | 19  | 5          | 7   | 1          |
| Mar 28 | 4015 | 244        | 3985 | 240        | 23  | 4          | 7   | 0          |
| Mar 29 | 4284 | 269        | 4251 | 266        | 26  | 3          | 7   | 0          |
| Mar 30 | 4445 | 161        | 4401 | 150        | 32  | 6          | 12  | 5          |
| Mar 31 | 4641 | 196        | 4589 | 188        | 39  | 7          | 13  | 1          |
| Apr 1  | 4877 | 236        | 4820 | 231        | 44  | 5          | 13  | 0          |
| Apr 2  | 5147 | 270        | 5065 | 245        | 50  | 6          | 32  | 19         |
| Apr 3  | 5370 | 223        | 5279 | 214        | 59  | 9          | 32  | 0          |
| Apr 4  | 5550 | 180        | 5456 | 177        | 62  | 3          | 32  | 0          |
| Apr 5  | 5687 | 137        | 5584 | 128        | 71  | 9          | 32  | 0          |
| Apr 6  | 5865 | 178        | 5757 | 173        | 76  | 5          | 32  | 0          |
| Apr 7  | 6086 | 221        | 5965 | 208        | 89  | 13         | 32  | 0          |
| Apr 8  | 6042 | -44        | 5909 | -56        | 101 | 12         | 32  | 0          |
| Apr 9  | 6219 | 177        | 6079 | 170        | 108 | 7          | 32  | 0          |
| Apr 10 | 6314 | 95         | 6169 | 90         | 113 | 5          | 32  | 0          |
| Apr 11 | 6409 | 95         | 6258 | 89         | 119 | 6          | 32  | 0          |
| Apr 12 | 6525 | 116        | 6365 | 107        | 128 | 9          | 32  | 0          |
| Apr 13 | 6603 | 78         | 6437 | 72         | 134 | 6          | 32  | 0          |
| Apr 14 | 6623 | 20         | 6452 | 15         | 139 | 5          | 32  | 0          |
| Apr 15 | 6797 | 174        | 6615 | 163        | 150 | 11         | 32  | 0          |
| Apr 16 | 6905 | 108        | 6721 | 106        | 152 | 2          | 32  | 0          |
| Apr 17 | 6937 | 32         | 6744 | 23         | 161 | 9          | 32  | 0          |
| Apr 18 | 7036 | 99         | 6840 | 96         | 164 | 3          | 32  | 0          |
| Apr 19 | 7078 | 42         | 6881 | 41         | 165 | 1          | 32  | 0          |
| Apr 20 | 7156 | 78         | 6943 | 62         | 181 | 16         | 32  | 0          |
| Apr 21 | 7241 | 85         | 7027 | 84         | 182 | 1          | 32  | 0          |
| Apr 22 | 7338 | 97         | 7119 | 92         | 187 | 5          | 32  | 0          |
| Apr 23 | 7401 | 63         | 7175 | 56         | 194 | 7          | 32  | 0          |
| Apr 24 | 7463 | 62         | 7232 | 57         | 199 | 5          | 32  | 0          |
| Apr 25 | 7493 | 30         | 7260 | 28         | 201 | 2          | 32  | 0          |
| Apr 26 | 7527 | 34         | 7294 | 34         | 201 | 0          | 32  | 0          |

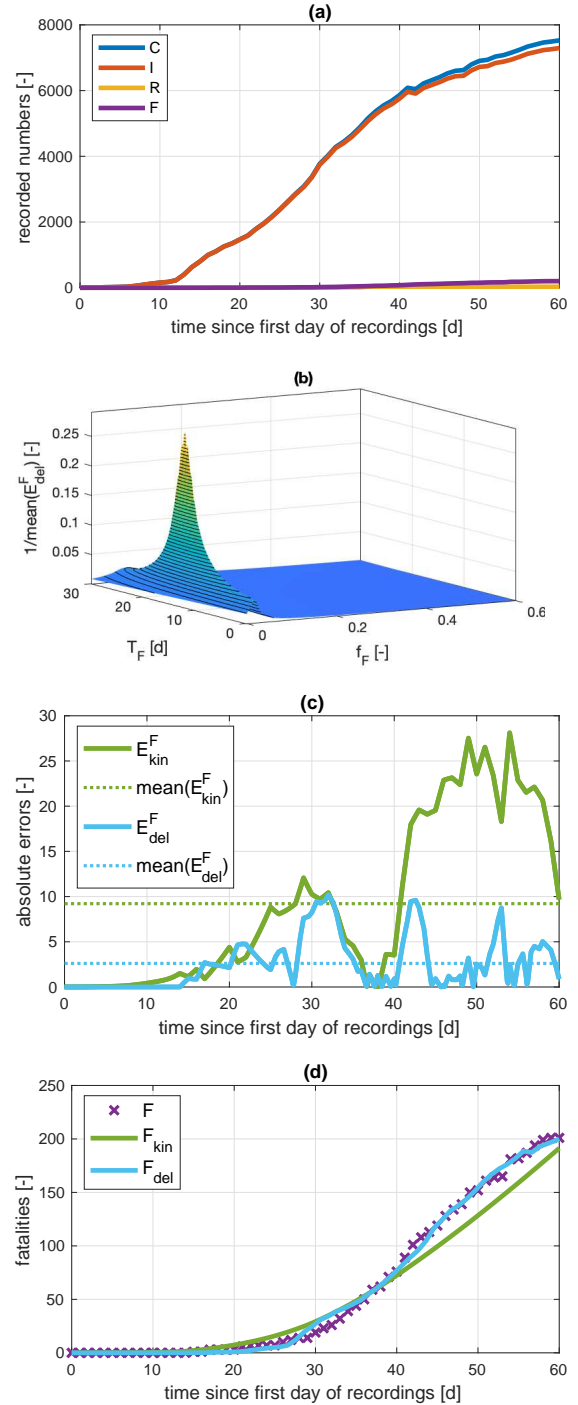

Figure 38: (a) Recorded data, (b) results of optimization based on infection-to-death delay rule, (c) absolute errors based on optimized parameter estimates, and (d) comparison between model-predicted fatalities based on optimized parameter estimates and recorded fatalities for Norway

Table 39: Data recorded in Pakistan

| Date   | $C$   | $\Delta C$ | $I$   | $\Delta I$ | $F$ | $\Delta F$ | $R$  | $\Delta R$ |
|--------|-------|------------|-------|------------|-----|------------|------|------------|
| Feb 26 | 2     | 2          | 2     | 2          | 0   | 0          | 0    | 0          |
| Feb 27 | 2     | 0          | 2     | 0          | 0   | 0          | 0    | 0          |
| Feb 28 | 2     | 0          | 2     | 0          | 0   | 0          | 0    | 0          |
| Feb 29 | 4     | 2          | 4     | 2          | 0   | 0          | 0    | 0          |
| Mar 1  | 4     | 0          | 4     | 0          | 0   | 0          | 0    | 0          |
| Mar 2  | 4     | 0          | 4     | 0          | 0   | 0          | 0    | 0          |
| Mar 3  | 5     | 1          | 5     | 1          | 0   | 0          | 0    | 0          |
| Mar 4  | 5     | 0          | 5     | 0          | 0   | 0          | 0    | 0          |
| Mar 5  | 5     | 0          | 5     | 0          | 0   | 0          | 0    | 0          |
| Mar 6  | 6     | 1          | 5     | 0          | 0   | 0          | 1    | 1          |
| Mar 7  | 6     | 0          | 5     | 0          | 0   | 0          | 1    | 0          |
| Mar 8  | 7     | 1          | 6     | 1          | 0   | 0          | 1    | 0          |
| Mar 9  | 16    | 9          | 15    | 9          | 0   | 0          | 1    | 0          |
| Mar 10 | 19    | 3          | 17    | 2          | 0   | 0          | 2    | 1          |
| Mar 11 | 20    | 1          | 18    | 1          | 0   | 0          | 2    | 0          |
| Mar 12 | 21    | 1          | 19    | 1          | 0   | 0          | 2    | 0          |
| Mar 13 | 28    | 7          | 26    | 7          | 0   | 0          | 2    | 0          |
| Mar 14 | 33    | 5          | 31    | 5          | 0   | 0          | 2    | 0          |
| Mar 15 | 53    | 20         | 51    | 20         | 0   | 0          | 2    | 0          |
| Mar 16 | 184   | 131        | 182   | 131        | 0   | 0          | 2    | 0          |
| Mar 17 | 247   | 63         | 245   | 63         | 0   | 0          | 2    | 0          |
| Mar 18 | 307   | 60         | 292   | 47         | 2   | 2          | 13   | 11         |
| Mar 19 | 454   | 147        | 439   | 147        | 2   | 0          | 13   | 0          |
| Mar 20 | 501   | 47         | 485   | 46         | 3   | 1          | 13   | 0          |
| Mar 21 | 645   | 144        | 629   | 144        | 3   | 0          | 13   | 0          |
| Mar 22 | 776   | 131        | 758   | 129        | 5   | 2          | 13   | 0          |
| Mar 23 | 875   | 99         | 856   | 98         | 6   | 1          | 13   | 0          |
| Mar 24 | 972   | 97         | 947   | 91         | 7   | 1          | 18   | 5          |
| Mar 25 | 1063  | 91         | 1034  | 87         | 8   | 1          | 21   | 3          |
| Mar 26 | 1201  | 138        | 1171  | 137        | 9   | 1          | 21   | 0          |
| Mar 27 | 1373  | 172        | 1339  | 168        | 11  | 2          | 23   | 2          |
| Mar 28 | 1495  | 122        | 1454  | 115        | 12  | 1          | 29   | 6          |
| Mar 29 | 1597  | 102        | 1554  | 100        | 14  | 2          | 29   | 0          |
| Mar 30 | 1717  | 120        | 1620  | 66         | 21  | 7          | 76   | 47         |
| Mar 31 | 1938  | 221        | 1836  | 216        | 26  | 5          | 76   | 0          |
| Apr 1  | 2118  | 180        | 1997  | 161        | 27  | 1          | 94   | 18         |
| Apr 2  | 2421  | 303        | 2262  | 265        | 34  | 7          | 125  | 31         |
| Apr 3  | 2686  | 265        | 2520  | 258        | 40  | 6          | 126  | 1          |
| Apr 4  | 2818  | 132        | 2646  | 126        | 41  | 1          | 131  | 5          |
| Apr 5  | 3157  | 339        | 2899  | 253        | 47  | 6          | 211  | 80         |
| Apr 6  | 3766  | 609        | 3454  | 555        | 53  | 6          | 259  | 48         |
| Apr 7  | 4035  | 269        | 3549  | 95         | 57  | 4          | 429  | 170        |
| Apr 8  | 4263  | 228        | 3735  | 186        | 61  | 4          | 467  | 38         |
| Apr 9  | 4489  | 226        | 3852  | 117        | 65  | 4          | 572  | 105        |
| Apr 10 | 4695  | 206        | 3902  | 50         | 66  | 1          | 727  | 155        |
| Apr 11 | 5011  | 316        | 4163  | 261        | 86  | 20         | 762  | 35         |
| Apr 12 | 5230  | 219        | 4111  | -52        | 91  | 5          | 1028 | 266        |
| Apr 13 | 5496  | 266        | 4308  | 197        | 93  | 2          | 1095 | 67         |
| Apr 14 | 5837  | 341        | 4363  | 55         | 96  | 3          | 1378 | 283        |
| Apr 15 | 6383  | 546        | 4826  | 463        | 111 | 15         | 1446 | 68         |
| Apr 16 | 6919  | 536        | 5146  | 320        | 128 | 17         | 1645 | 199        |
| Apr 17 | 7025  | 106        | 5125  | -21        | 135 | 7          | 1765 | 120        |
| Apr 18 | 7638  | 613        | 5663  | 538        | 143 | 8          | 1832 | 67         |
| Apr 19 | 8348  | 710        | 6312  | 649        | 168 | 25         | 1868 | 36         |
| Apr 20 | 8892  | 544        | 6746  | 434        | 176 | 8          | 1970 | 102        |
| Apr 21 | 9565  | 673        | 7291  | 545        | 201 | 25         | 2073 | 103        |
| Apr 22 | 10076 | 511        | 7708  | 417        | 212 | 11         | 2156 | 83         |
| Apr 23 | 11057 | 981        | 8485  | 777        | 235 | 23         | 2337 | 181        |
| Apr 24 | 11940 | 883        | 8932  | 447        | 253 | 18         | 2755 | 418        |
| Apr 25 | 12723 | 783        | 9588  | 656        | 269 | 16         | 2866 | 111        |
| Apr 26 | 13328 | 605        | 10111 | 523        | 281 | 12         | 2936 | 70         |

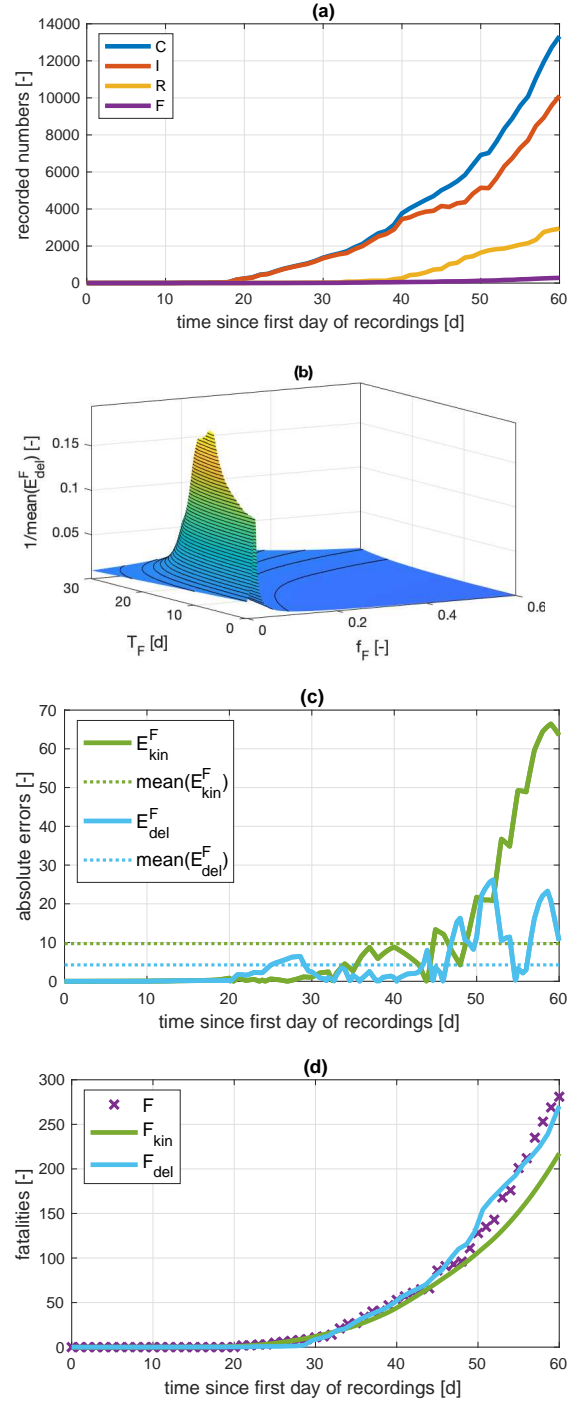

Figure 39: (a) Recorded data, (b) results of optimization based on infection-to-death delay rule, (c) absolute errors based on optimized parameter estimates, and (d) comparison between model-predicted fatalities based on optimized parameter estimates and recorded fatalities for Pakistan

Table 40: Data recorded in Panama

| Date   | C    | $\Delta C$ | I    | $\Delta I$ | F   | $\Delta F$ | R   | $\Delta R$ |
|--------|------|------------|------|------------|-----|------------|-----|------------|
| Mar 10 | 1    | 1          | 1    | 1          | 0   | 0          | 0   | 0          |
| Mar 11 | 14   | 13         | 13   | 12         | 1   | 1          | 0   | 0          |
| Mar 12 | 14   | 0          | 13   | 0          | 1   | 0          | 0   | 0          |
| Mar 13 | 27   | 13         | 26   | 13         | 1   | 0          | 0   | 0          |
| Mar 14 | 43   | 16         | 42   | 16         | 1   | 0          | 0   | 0          |
| Mar 15 | 55   | 12         | 54   | 12         | 1   | 0          | 0   | 0          |
| Mar 16 | 69   | 14         | 68   | 14         | 1   | 0          | 0   | 0          |
| Mar 17 | 69   | 0          | 68   | 0          | 1   | 0          | 0   | 0          |
| Mar 18 | 109  | 40         | 108  | 40         | 1   | 0          | 0   | 0          |
| Mar 19 | 137  | 28         | 135  | 27         | 1   | 0          | 1   | 1          |
| Mar 20 | 200  | 63         | 198  | 63         | 1   | 0          | 1   | 0          |
| Mar 21 | 245  | 45         | 241  | 43         | 3   | 2          | 1   | 0          |
| Mar 22 | 313  | 68         | 309  | 68         | 3   | 0          | 1   | 0          |
| Mar 23 | 345  | 32         | 338  | 29         | 6   | 3          | 1   | 0          |
| Mar 24 | 443  | 98         | 436  | 98         | 6   | 0          | 1   | 0          |
| Mar 25 | 558  | 115        | 548  | 112        | 8   | 2          | 2   | 1          |
| Mar 26 | 674  | 116        | 663  | 115        | 9   | 1          | 2   | 0          |
| Mar 27 | 786  | 112        | 770  | 107        | 14  | 5          | 2   | 0          |
| Mar 28 | 901  | 115        | 880  | 110        | 17  | 3          | 4   | 2          |
| Mar 29 | 989  | 88         | 961  | 81         | 24  | 7          | 4   | 0          |
| Mar 30 | 1075 | 86         | 1039 | 78         | 27  | 3          | 9   | 5          |
| Mar 31 | 1181 | 106        | 1142 | 103        | 30  | 3          | 9   | 0          |
| Apr 1  | 1317 | 136        | 1276 | 134        | 32  | 2          | 9   | 0          |
| Apr 2  | 1475 | 158        | 1429 | 153        | 37  | 5          | 9   | 0          |
| Apr 3  | 1673 | 198        | 1622 | 193        | 41  | 4          | 10  | 1          |
| Apr 4  | 1801 | 128        | 1742 | 120        | 46  | 5          | 13  | 3          |
| Apr 5  | 1801 | 0          | 1742 | 0          | 46  | 0          | 13  | 0          |
| Apr 6  | 2100 | 299        | 2031 | 289        | 55  | 9          | 14  | 1          |
| Apr 7  | 2100 | 0          | 2031 | 0          | 55  | 0          | 14  | 0          |
| Apr 8  | 2528 | 428        | 2449 | 418        | 63  | 8          | 16  | 2          |
| Apr 9  | 2752 | 224        | 2670 | 221        | 66  | 3          | 16  | 0          |
| Apr 10 | 2974 | 222        | 2883 | 213        | 74  | 8          | 17  | 1          |
| Apr 11 | 3234 | 260        | 3132 | 249        | 79  | 5          | 23  | 6          |
| Apr 12 | 3400 | 166        | 3284 | 152        | 87  | 8          | 29  | 6          |
| Apr 13 | 3472 | 72         | 3317 | 33         | 94  | 7          | 61  | 32         |
| Apr 14 | 3574 | 102        | 3407 | 90         | 95  | 1          | 72  | 11         |
| Apr 15 | 3751 | 177        | 3573 | 166        | 103 | 8          | 75  | 3          |
| Apr 16 | 3751 | 0          | 3573 | 0          | 103 | 0          | 75  | 0          |
| Apr 17 | 4016 | 265        | 3809 | 236        | 109 | 6          | 98  | 23         |
| Apr 18 | 4210 | 194        | 3972 | 163        | 116 | 7          | 122 | 24         |
| Apr 19 | 4273 | 63         | 4013 | 41         | 120 | 4          | 140 | 18         |
| Apr 20 | 4467 | 194        | 4176 | 163        | 126 | 6          | 165 | 25         |
| Apr 21 | 4658 | 191        | 4318 | 142        | 136 | 10         | 204 | 39         |
| Apr 22 | 4821 | 163        | 4449 | 131        | 141 | 5          | 231 | 27         |
| Apr 23 | 4992 | 171        | 4593 | 144        | 144 | 3          | 255 | 24         |
| Apr 24 | 5166 | 174        | 4749 | 156        | 146 | 2          | 271 | 16         |
| Apr 25 | 5338 | 172        | 4865 | 116        | 154 | 8          | 319 | 48         |
| Apr 26 | 5538 | 200        | 5041 | 176        | 159 | 5          | 338 | 19         |

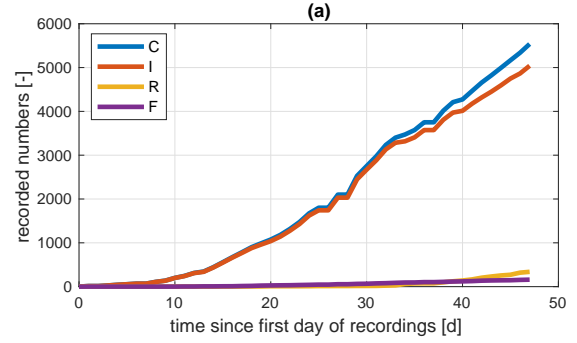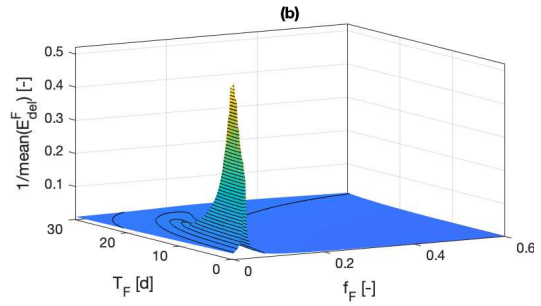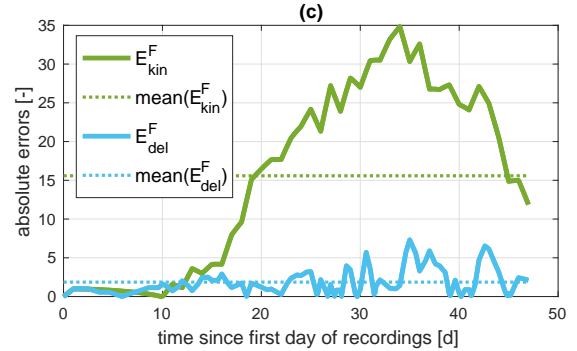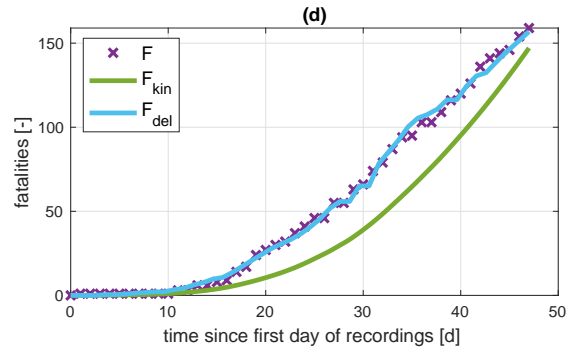

Figure 40: (a) Recorded data, (b) results of optimization based on infection-to-death delay rule, (c) absolute errors based on optimized parameter estimates, and (d) comparison between model-predicted fatalities based on optimized parameter estimates and recorded fatalities for Panama

Table 41: Data recorded in Peru

| Date   | C     | $\Delta C$ | I     | $\Delta I$ | F   | $\Delta F$ | R    | $\Delta R$ |
|--------|-------|------------|-------|------------|-----|------------|------|------------|
| Mar 6  | 1     | 1          | 1     | 1          | 0   | 0          | 0    | 0          |
| Mar 7  | 6     | 5          | 6     | 5          | 0   | 0          | 0    | 0          |
| Mar 8  | 7     | 1          | 7     | 1          | 0   | 0          | 0    | 0          |
| Mar 9  | 9     | 2          | 9     | 2          | 0   | 0          | 0    | 0          |
| Mar 10 | 11    | 2          | 11    | 2          | 0   | 0          | 0    | 0          |
| Mar 11 | 17    | 6          | 17    | 6          | 0   | 0          | 0    | 0          |
| Mar 12 | 22    | 5          | 22    | 5          | 0   | 0          | 0    | 0          |
| Mar 13 | 38    | 16         | 38    | 16         | 0   | 0          | 0    | 0          |
| Mar 14 | 43    | 5          | 43    | 5          | 0   | 0          | 0    | 0          |
| Mar 15 | 71    | 28         | 71    | 28         | 0   | 0          | 0    | 0          |
| Mar 16 | 86    | 15         | 85    | 14         | 0   | 0          | 1    | 1          |
| Mar 17 | 117   | 31         | 116   | 31         | 0   | 0          | 1    | 0          |
| Mar 18 | 145   | 28         | 144   | 28         | 0   | 0          | 1    | 0          |
| Mar 19 | 234   | 89         | 232   | 88         | 1   | 1          | 1    | 0          |
| Mar 20 | 263   | 29         | 258   | 26         | 4   | 3          | 1    | 0          |
| Mar 21 | 318   | 55         | 312   | 54         | 5   | 1          | 1    | 0          |
| Mar 22 | 363   | 45         | 357   | 45         | 5   | 0          | 1    | 0          |
| Mar 23 | 395   | 32         | 389   | 32         | 5   | 0          | 1    | 0          |
| Mar 24 | 416   | 21         | 408   | 19         | 7   | 2          | 1    | 0          |
| Mar 25 | 480   | 64         | 470   | 62         | 9   | 2          | 1    | 0          |
| Mar 26 | 580   | 100        | 557   | 87         | 9   | 0          | 14   | 13         |
| Mar 27 | 635   | 55         | 608   | 51         | 11  | 2          | 16   | 2          |
| Mar 28 | 671   | 36         | 639   | 31         | 16  | 5          | 16   | 0          |
| Mar 29 | 852   | 181        | 818   | 179        | 18  | 2          | 16   | 0          |
| Mar 30 | 950   | 98         | 873   | 55         | 24  | 6          | 53   | 37         |
| Mar 31 | 1065  | 115        | 641   | -232       | 30  | 6          | 394  | 341        |
| Apr 1  | 1323  | 258        | 891   | 250        | 38  | 8          | 394  | 0          |
| Apr 2  | 1414  | 91         | 822   | -69        | 55  | 17         | 537  | 143        |
| Apr 3  | 1595  | 181        | 997   | 175        | 61  | 6          | 537  | 0          |
| Apr 4  | 1746  | 151        | 759   | -238       | 73  | 12         | 914  | 377        |
| Apr 5  | 2281  | 535        | 1209  | 450        | 83  | 10         | 989  | 75         |
| Apr 6  | 2561  | 280        | 1472  | 263        | 92  | 9          | 997  | 8          |
| Apr 7  | 2954  | 393        | 1546  | 74         | 107 | 15         | 1301 | 304        |
| Apr 8  | 4342  | 1388       | 2888  | 1342       | 121 | 14         | 1333 | 32         |
| Apr 9  | 5256  | 914        | 3680  | 792        | 138 | 17         | 1438 | 105        |
| Apr 10 | 5897  | 641        | 4159  | 479        | 169 | 31         | 1569 | 131        |
| Apr 11 | 6848  | 951        | 4928  | 769        | 181 | 12         | 1739 | 170        |
| Apr 12 | 7519  | 671        | 5528  | 600        | 193 | 12         | 1798 | 59         |
| Apr 13 | 9784  | 2265       | 6926  | 1398       | 216 | 23         | 2642 | 844        |
| Apr 14 | 10303 | 519        | 7204  | 278        | 230 | 14         | 2869 | 227        |
| Apr 15 | 11475 | 1172       | 8113  | 909        | 254 | 24         | 3108 | 239        |
| Apr 16 | 12491 | 1016       | 6097  | -2016      | 274 | 20         | 6120 | 3012       |
| Apr 17 | 13489 | 998        | 6648  | 551        | 300 | 26         | 6541 | 421        |
| Apr 18 | 14420 | 931        | 7388  | 740        | 348 | 48         | 6684 | 143        |
| Apr 19 | 15628 | 1208       | 8417  | 1029       | 400 | 52         | 6811 | 127        |
| Apr 20 | 16325 | 697        | 8912  | 495        | 445 | 45         | 6968 | 157        |
| Apr 21 | 17837 | 1512       | 10371 | 1459       | 484 | 39         | 6982 | 14         |
| Apr 22 | 19250 | 1413       | 11693 | 1322       | 530 | 46         | 7027 | 45         |
| Apr 23 | 20914 | 1664       | 12920 | 1227       | 572 | 42         | 7422 | 395        |
| Apr 24 | 21648 | 734        | 13518 | 598        | 634 | 62         | 7496 | 74         |
| Apr 25 | 25331 | 3683       | 16834 | 3316       | 700 | 66         | 7797 | 301        |
| Apr 26 | 27517 | 2186       | 18701 | 1867       | 728 | 28         | 8088 | 291        |

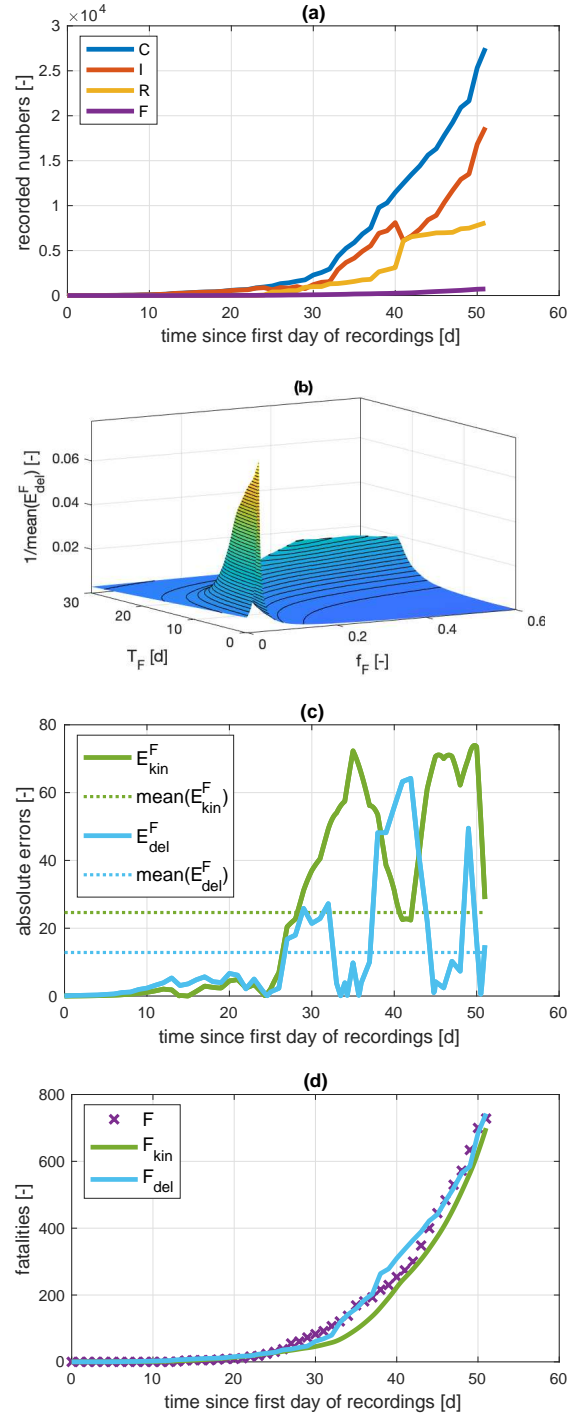

Figure 41: (a) Recorded data, (b) results of optimization based on infection-to-death delay rule, (c) absolute errors based on optimized parameter estimates, and (d) comparison between model-predicted fatalities based on optimized parameter estimates and recorded fatalities for Peru

Table 42: Data recorded in Philippines

| Date   | C    | $\Delta C$ | I    | $\Delta I$ | F   | $\Delta F$ | R   | $\Delta R$ |
|--------|------|------------|------|------------|-----|------------|-----|------------|
| Feb 15 | 3    | 3          | 0    | 0          | 1   | 1          | 2   | 2          |
| Feb 16 | 3    | 0          | 0    | 0          | 1   | 0          | 2   | 0          |
| Feb 17 | 3    | 0          | 0    | 0          | 1   | 0          | 2   | 0          |
| Feb 18 | 3    | 0          | 0    | 0          | 1   | 0          | 2   | 0          |
| Feb 19 | 3    | 0          | 0    | 0          | 1   | 0          | 2   | 0          |
| Feb 20 | 3    | 0          | 0    | 0          | 1   | 0          | 2   | 0          |
| Feb 21 | 3    | 0          | 0    | 0          | 1   | 0          | 2   | 0          |
| Feb 22 | 3    | 0          | 0    | 0          | 1   | 0          | 2   | 0          |
| Feb 23 | 3    | 0          | 0    | 0          | 1   | 0          | 2   | 0          |
| Feb 24 | 3    | 0          | 0    | 0          | 1   | 0          | 2   | 0          |
| Feb 25 | 3    | 0          | 0    | 0          | 1   | 0          | 2   | 0          |
| Feb 26 | 3    | 0          | 0    | 0          | 1   | 0          | 2   | 0          |
| Feb 27 | 3    | 0          | 0    | 0          | 1   | 0          | 2   | 0          |
| Feb 28 | 3    | 0          | 0    | 0          | 1   | 0          | 2   | 0          |
| Feb 29 | 3    | 0          | 0    | 0          | 1   | 0          | 2   | 0          |
| Mar 1  | 3    | 0          | 0    | 0          | 1   | 0          | 2   | 0          |
| Mar 2  | 3    | 0          | 0    | 0          | 1   | 0          | 2   | 0          |
| Mar 3  | 3    | 0          | 0    | 0          | 1   | 0          | 2   | 0          |
| Mar 4  | 3    | 0          | 0    | 0          | 1   | 0          | 2   | 0          |
| Mar 5  | 3    | 0          | 0    | 0          | 1   | 0          | 2   | 0          |
| Mar 6  | 5    | 2          | 2    | 2          | 1   | 0          | 2   | 0          |
| Mar 7  | 6    | 1          | 3    | 1          | 1   | 0          | 2   | 0          |
| Mar 8  | 10   | 4          | 7    | 4          | 1   | 0          | 2   | 0          |
| Mar 9  | 24   | 14         | 21   | 14         | 1   | 0          | 2   | 0          |
| Mar 10 | 33   | 9          | 30   | 9          | 1   | 0          | 2   | 0          |
| Mar 11 | 49   | 16         | 45   | 15         | 2   | 1          | 2   | 0          |
| Mar 12 | 52   | 3          | 45   | 0          | 5   | 3          | 2   | 0          |
| Mar 13 | 64   | 12         | 57   | 12         | 5   | 0          | 2   | 0          |
| Mar 14 | 111  | 47         | 101  | 44         | 8   | 3          | 2   | 0          |
| Mar 15 | 140  | 29         | 126  | 25         | 12  | 4          | 2   | 0          |
| Mar 16 | 142  | 2          | 127  | 1          | 12  | 0          | 3   | 1          |
| Mar 17 | 187  | 45         | 169  | 42         | 14  | 2          | 4   | 1          |
| Mar 18 | 202  | 15         | 178  | 9          | 17  | 3          | 7   | 3          |
| Mar 19 | 217  | 15         | 192  | 14         | 17  | 0          | 8   | 1          |
| Mar 20 | 230  | 13         | 204  | 12         | 18  | 1          | 8   | 0          |
| Mar 21 | 307  | 77         | 275  | 71         | 19  | 1          | 13  | 5          |
| Mar 22 | 380  | 73         | 340  | 65         | 25  | 6          | 15  | 2          |
| Mar 23 | 462  | 82         | 411  | 71         | 33  | 8          | 18  | 3          |
| Mar 24 | 552  | 90         | 497  | 86         | 35  | 2          | 20  | 2          |
| Mar 25 | 636  | 84         | 572  | 75         | 38  | 3          | 26  | 6          |
| Mar 26 | 707  | 71         | 634  | 62         | 45  | 7          | 28  | 2          |
| Mar 27 | 803  | 96         | 718  | 84         | 54  | 9          | 31  | 3          |
| Mar 28 | 1075 | 272        | 972  | 254        | 68  | 14         | 35  | 4          |
| Mar 29 | 1418 | 343        | 1305 | 333        | 71  | 3          | 42  | 7          |
| Mar 30 | 1546 | 128        | 1426 | 121        | 78  | 7          | 42  | 0          |
| Mar 31 | 2084 | 538        | 1947 | 521        | 88  | 10         | 49  | 7          |
| Apr 1  | 2311 | 227        | 2165 | 218        | 96  | 8          | 50  | 1          |
| Apr 2  | 2633 | 322        | 2475 | 310        | 107 | 11         | 51  | 1          |
| Apr 3  | 3018 | 385        | 2830 | 355        | 136 | 29         | 52  | 1          |
| Apr 4  | 3094 | 76         | 2893 | 63         | 144 | 8          | 57  | 5          |
| Apr 5  | 3246 | 152        | 3030 | 137        | 152 | 8          | 64  | 7          |
| Apr 6  | 3660 | 414        | 3424 | 394        | 163 | 11         | 73  | 9          |
| Apr 7  | 3764 | 104        | 3503 | 79         | 177 | 14         | 84  | 11         |
| Apr 8  | 3870 | 106        | 3592 | 89         | 182 | 5          | 96  | 12         |
| Apr 9  | 4076 | 206        | 3749 | 157        | 203 | 21         | 124 | 28         |
| Apr 10 | 4195 | 119        | 3834 | 85         | 221 | 18         | 140 | 16         |
| Apr 11 | 4428 | 233        | 4024 | 190        | 247 | 26         | 157 | 17         |
| Apr 12 | 4648 | 220        | 4154 | 130        | 297 | 50         | 197 | 40         |
| Apr 13 | 4932 | 284        | 4375 | 221        | 315 | 18         | 242 | 45         |
| Apr 14 | 5223 | 291        | 4593 | 218        | 335 | 20         | 295 | 53         |
| Apr 15 | 5453 | 230        | 4751 | 158        | 349 | 14         | 353 | 58         |
| Apr 16 | 5660 | 207        | 4863 | 112        | 362 | 13         | 435 | 82         |
| Apr 17 | 5878 | 218        | 5004 | 141        | 387 | 25         | 487 | 52         |
| Apr 18 | 6087 | 209        | 5174 | 170        | 397 | 10         | 516 | 29         |
| Apr 19 | 6259 | 172        | 5278 | 104        | 409 | 12         | 572 | 56         |
| Apr 20 | 6459 | 200        | 5418 | 140        | 428 | 19         | 613 | 41         |
| Apr 21 | 6599 | 140        | 5508 | 90         | 437 | 9          | 654 | 41         |
| Apr 22 | 6710 | 111        | 5571 | 63         | 446 | 9          | 693 | 39         |
| Apr 23 | 6981 | 271        | 5797 | 226        | 462 | 16         | 722 | 29         |
| Apr 24 | 7192 | 211        | 5953 | 156        | 477 | 15         | 762 | 40         |
| Apr 25 | 7294 | 102        | 6008 | 55         | 494 | 17         | 792 | 30         |
| Apr 26 | 7579 | 285        | 6216 | 208        | 501 | 7          | 862 | 70         |

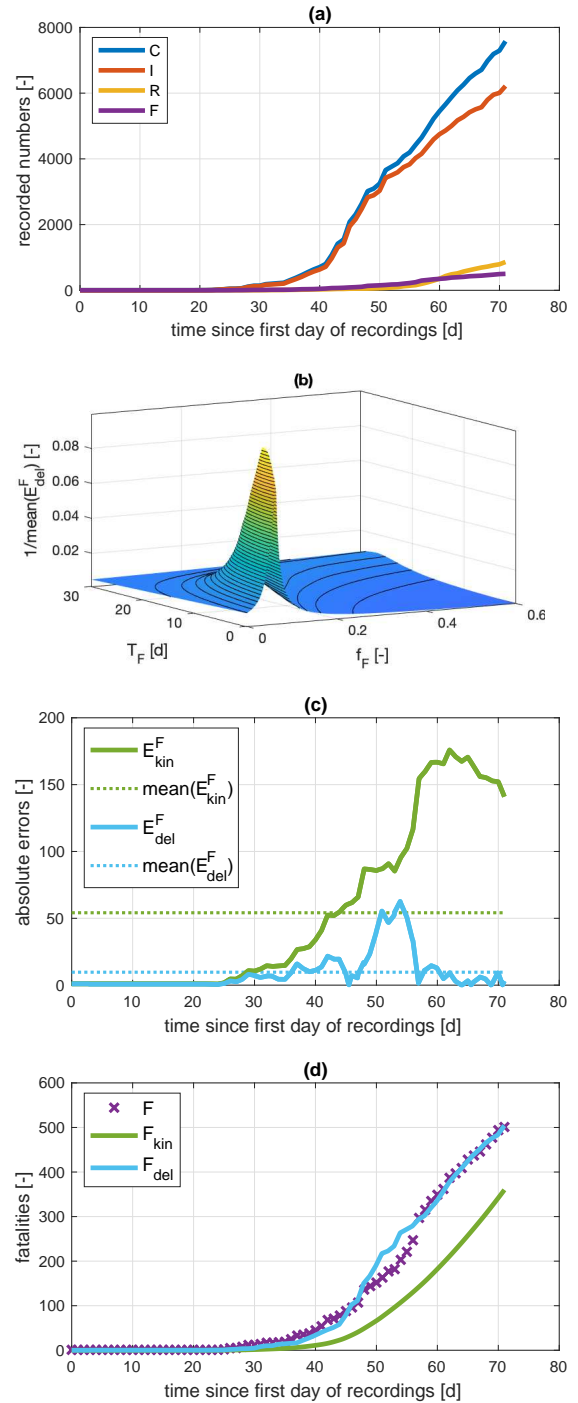

Figure 42: (a) Recorded data, (b) results of optimization based on infection-to-death delay rule, (c) absolute errors based on optimized parameter estimates, and (d) comparison between model-predicted fatalities based on optimized parameter estimates and recorded fatalities for Philippines



Table 43: Data recorded in Poland

| Date   | $C$   | $\Delta C$ | $I$  | $\Delta I$ | $F$ | $\Delta F$ | $R$  | $\Delta R$ |
|--------|-------|------------|------|------------|-----|------------|------|------------|
| Mar 4  | 1     | 1          | 1    | 1          | 0   | 0          | 0    | 0          |
| Mar 5  | 1     | 0          | 1    | 0          | 0   | 0          | 0    | 0          |
| Mar 6  | 5     | 4          | 5    | 4          | 0   | 0          | 0    | 0          |
| Mar 7  | 6     | 1          | 6    | 1          | 0   | 0          | 0    | 0          |
| Mar 8  | 11    | 5          | 11   | 5          | 0   | 0          | 0    | 0          |
| Mar 9  | 17    | 6          | 17   | 6          | 0   | 0          | 0    | 0          |
| Mar 10 | 22    | 5          | 22   | 5          | 0   | 0          | 0    | 0          |
| Mar 11 | 31    | 9          | 31   | 9          | 0   | 0          | 0    | 0          |
| Mar 12 | 51    | 20         | 50   | 19         | 1   | 1          | 0    | 0          |
| Mar 13 | 68    | 17         | 66   | 16         | 2   | 1          | 0    | 0          |
| Mar 14 | 104   | 36         | 88   | 22         | 3   | 1          | 13   | 13         |
| Mar 15 | 125   | 21         | 109  | 21         | 3   | 0          | 13   | 0          |
| Mar 16 | 177   | 52         | 160  | 51         | 4   | 1          | 13   | 0          |
| Mar 17 | 238   | 61         | 220  | 60         | 5   | 1          | 13   | 0          |
| Mar 18 | 287   | 49         | 269  | 49         | 5   | 0          | 13   | 0          |
| Mar 19 | 355   | 68         | 337  | 68         | 5   | 0          | 13   | 0          |
| Mar 20 | 425   | 70         | 407  | 70         | 5   | 0          | 13   | 0          |
| Mar 21 | 536   | 111        | 518  | 111        | 5   | 0          | 13   | 0          |
| Mar 22 | 634   | 98         | 614  | 96         | 7   | 2          | 13   | 0          |
| Mar 23 | 749   | 115        | 728  | 114        | 8   | 1          | 13   | 0          |
| Mar 24 | 901   | 152        | 890  | 162        | 10  | 2          | 1    | -12        |
| Mar 25 | 1051  | 150        | 1030 | 140        | 14  | 4          | 7    | 6          |
| Mar 26 | 1221  | 170        | 1198 | 168        | 16  | 2          | 7    | 0          |
| Mar 27 | 1389  | 168        | 1366 | 168        | 16  | 0          | 7    | 0          |
| Mar 28 | 1638  | 249        | 1613 | 247        | 18  | 2          | 7    | 0          |
| Mar 29 | 1862  | 224        | 1833 | 220        | 22  | 4          | 7    | 0          |
| Mar 30 | 2055  | 193        | 2017 | 184        | 31  | 9          | 7    | 0          |
| Mar 31 | 2311  | 256        | 2271 | 254        | 33  | 2          | 7    | 0          |
| Apr 1  | 2554  | 243        | 2455 | 184        | 43  | 10         | 56   | 49         |
| Apr 2  | 2946  | 392        | 2833 | 378        | 57  | 14         | 56   | 0          |
| Apr 3  | 3383  | 437        | 3256 | 423        | 71  | 14         | 56   | 0          |
| Apr 4  | 3627  | 244        | 3432 | 176        | 79  | 8          | 116  | 60         |
| Apr 5  | 4102  | 475        | 3874 | 442        | 94  | 15         | 134  | 18         |
| Apr 6  | 4413  | 311        | 4144 | 270        | 107 | 13         | 162  | 28         |
| Apr 7  | 4848  | 435        | 4528 | 384        | 129 | 22         | 191  | 29         |
| Apr 8  | 5205  | 357        | 4824 | 296        | 159 | 30         | 222  | 31         |
| Apr 9  | 5575  | 370        | 5117 | 293        | 174 | 15         | 284  | 62         |
| Apr 10 | 5955  | 380        | 5456 | 339        | 181 | 7          | 318  | 34         |
| Apr 11 | 6356  | 401        | 5773 | 317        | 208 | 27         | 375  | 57         |
| Apr 12 | 6674  | 318        | 6003 | 230        | 232 | 24         | 439  | 64         |
| Apr 13 | 6934  | 260        | 6202 | 199        | 245 | 13         | 487  | 48         |
| Apr 14 | 7202  | 268        | 6321 | 119        | 263 | 18         | 618  | 131        |
| Apr 15 | 7582  | 380        | 6628 | 307        | 286 | 23         | 668  | 50         |
| Apr 16 | 7918  | 336        | 6830 | 202        | 314 | 28         | 774  | 106        |
| Apr 17 | 8379  | 461        | 7181 | 351        | 332 | 18         | 866  | 92         |
| Apr 18 | 8742  | 363        | 7414 | 233        | 347 | 15         | 981  | 115        |
| Apr 19 | 9287  | 545        | 7887 | 473        | 360 | 13         | 1040 | 59         |
| Apr 20 | 9593  | 306        | 8080 | 193        | 380 | 20         | 1133 | 93         |
| Apr 21 | 9856  | 263        | 8158 | 78         | 401 | 21         | 1297 | 164        |
| Apr 22 | 10169 | 313        | 8230 | 72         | 426 | 25         | 1513 | 216        |
| Apr 23 | 10511 | 342        | 8317 | 87         | 454 | 28         | 1740 | 227        |
| Apr 24 | 10892 | 381        | 8454 | 137        | 494 | 40         | 1944 | 204        |
| Apr 25 | 11273 | 381        | 8623 | 169        | 524 | 30         | 2126 | 182        |
| Apr 26 | 11617 | 344        | 8817 | 194        | 535 | 11         | 2265 | 139        |

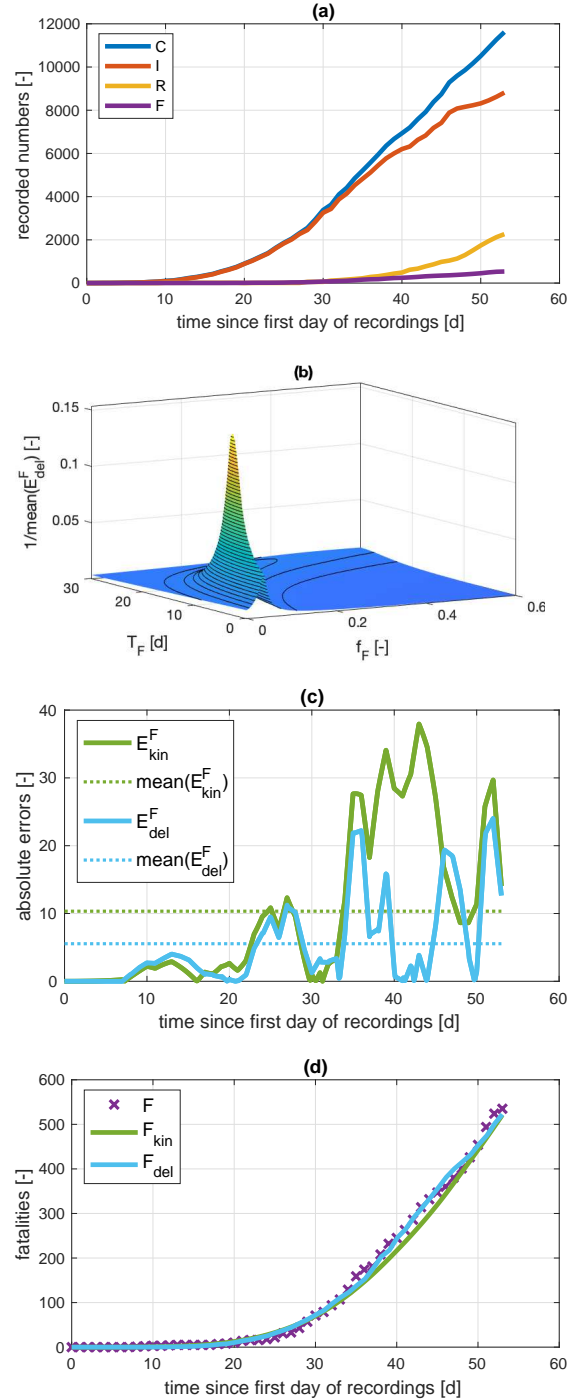

Figure 43: (a) Recorded data, (b) results of optimization based on infection-to-death delay rule, (c) absolute errors based on optimized parameter estimates, and (d) comparison between model-predicted fatalities based on optimized parameter estimates and recorded fatalities for Poland

Table 44: Data recorded in Portugal

| Date   | $C$   | $\Delta C$ | $I$   | $\Delta I$ | $F$ | $\Delta F$ | $R$  | $\Delta R$ |
|--------|-------|------------|-------|------------|-----|------------|------|------------|
| Mar 2  | 2     | 2          | 2     | 2          | 0   | 0          | 0    | 0          |
| Mar 3  | 4     | 2          | 4     | 2          | 0   | 0          | 0    | 0          |
| Mar 4  | 6     | 2          | 6     | 2          | 0   | 0          | 0    | 0          |
| Mar 5  | 9     | 3          | 9     | 3          | 0   | 0          | 0    | 0          |
| Mar 6  | 13    | 4          | 13    | 4          | 0   | 0          | 0    | 0          |
| Mar 7  | 21    | 8          | 21    | 8          | 0   | 0          | 0    | 0          |
| Mar 8  | 30    | 9          | 30    | 9          | 0   | 0          | 0    | 0          |
| Mar 9  | 39    | 9          | 39    | 9          | 0   | 0          | 0    | 0          |
| Mar 10 | 41    | 2          | 41    | 2          | 0   | 0          | 0    | 0          |
| Mar 11 | 61    | 20         | 61    | 20         | 0   | 0          | 0    | 0          |
| Mar 12 | 78    | 17         | 77    | 16         | 0   | 0          | 1    | 1          |
| Mar 13 | 112   | 34         | 111   | 34         | 0   | 0          | 1    | 0          |
| Mar 14 | 169   | 57         | 167   | 56         | 0   | 0          | 2    | 1          |
| Mar 15 | 245   | 76         | 242   | 75         | 0   | 0          | 3    | 1          |
| Mar 16 | 331   | 86         | 327   | 85         | 1   | 1          | 3    | 0          |
| Mar 17 | 448   | 117        | 444   | 117        | 1   | 0          | 3    | 0          |
| Mar 18 | 642   | 194        | 636   | 192        | 2   | 1          | 4    | 1          |
| Mar 19 | 786   | 144        | 778   | 142        | 4   | 2          | 4    | 0          |
| Mar 20 | 1020  | 234        | 1009  | 231        | 6   | 2          | 5    | 1          |
| Mar 21 | 1280  | 260        | 1263  | 254        | 12  | 6          | 5    | 0          |
| Mar 22 | 1600  | 320        | 1581  | 318        | 14  | 2          | 5    | 0          |
| Mar 23 | 2060  | 460        | 2023  | 442        | 23  | 9          | 14   | 9          |
| Mar 24 | 2362  | 302        | 2307  | 284        | 33  | 10         | 22   | 8          |
| Mar 25 | 2995  | 633        | 2930  | 623        | 43  | 10         | 22   | 0          |
| Mar 26 | 3544  | 549        | 3441  | 511        | 60  | 17         | 43   | 21         |
| Mar 27 | 4268  | 724        | 4149  | 708        | 76  | 16         | 43   | 0          |
| Mar 28 | 5170  | 902        | 5027  | 878        | 100 | 24         | 43   | 0          |
| Mar 29 | 5962  | 792        | 5800  | 773        | 119 | 19         | 43   | 0          |
| Mar 30 | 6408  | 446        | 6225  | 425        | 140 | 21         | 43   | 0          |
| Mar 31 | 7443  | 1035       | 7240  | 1015       | 160 | 20         | 43   | 0          |
| Apr 1  | 8251  | 808        | 8021  | 781        | 187 | 27         | 43   | 0          |
| Apr 2  | 9034  | 783        | 8757  | 736        | 209 | 22         | 68   | 25         |
| Apr 3  | 9886  | 852        | 9572  | 815        | 246 | 37         | 68   | 0          |
| Apr 4  | 10524 | 638        | 10183 | 611        | 266 | 20         | 75   | 7          |
| Apr 5  | 11278 | 754        | 10908 | 725        | 295 | 29         | 75   | 0          |
| Apr 6  | 11730 | 452        | 11279 | 371        | 311 | 16         | 140  | 65         |
| Apr 7  | 12442 | 712        | 11913 | 634        | 345 | 34         | 184  | 44         |
| Apr 8  | 13141 | 699        | 12565 | 652        | 380 | 35         | 196  | 12         |
| Apr 9  | 13956 | 815        | 13342 | 777        | 409 | 29         | 205  | 9          |
| Apr 10 | 15472 | 1516       | 14804 | 1462       | 435 | 26         | 233  | 28         |
| Apr 11 | 15987 | 515        | 15251 | 447        | 470 | 35         | 266  | 33         |
| Apr 12 | 16585 | 598        | 15804 | 553        | 504 | 34         | 277  | 11         |
| Apr 13 | 16934 | 349        | 16122 | 318        | 535 | 31         | 277  | 0          |
| Apr 14 | 17448 | 514        | 16534 | 412        | 567 | 32         | 347  | 70         |
| Apr 15 | 18091 | 643        | 17109 | 575        | 599 | 32         | 383  | 36         |
| Apr 16 | 18841 | 750        | 17719 | 610        | 629 | 30         | 493  | 110        |
| Apr 17 | 19022 | 181        | 17846 | 127        | 657 | 28         | 519  | 26         |
| Apr 18 | 19685 | 663        | 18388 | 542        | 687 | 30         | 610  | 91         |
| Apr 19 | 20206 | 521        | 18882 | 494        | 714 | 27         | 610  | 0          |
| Apr 20 | 20863 | 657        | 19518 | 636        | 735 | 21         | 610  | 0          |
| Apr 21 | 21379 | 516        | 19700 | 182        | 762 | 27         | 917  | 307        |
| Apr 22 | 21982 | 603        | 20054 | 354        | 785 | 23         | 1143 | 226        |
| Apr 23 | 22353 | 371        | 20332 | 278        | 820 | 35         | 1201 | 58         |
| Apr 24 | 22797 | 444        | 20715 | 383        | 854 | 34         | 1228 | 27         |
| Apr 25 | 23392 | 595        | 21235 | 520        | 880 | 26         | 1277 | 49         |
| Apr 26 | 23864 | 472        | 21632 | 397        | 903 | 23         | 1329 | 52         |

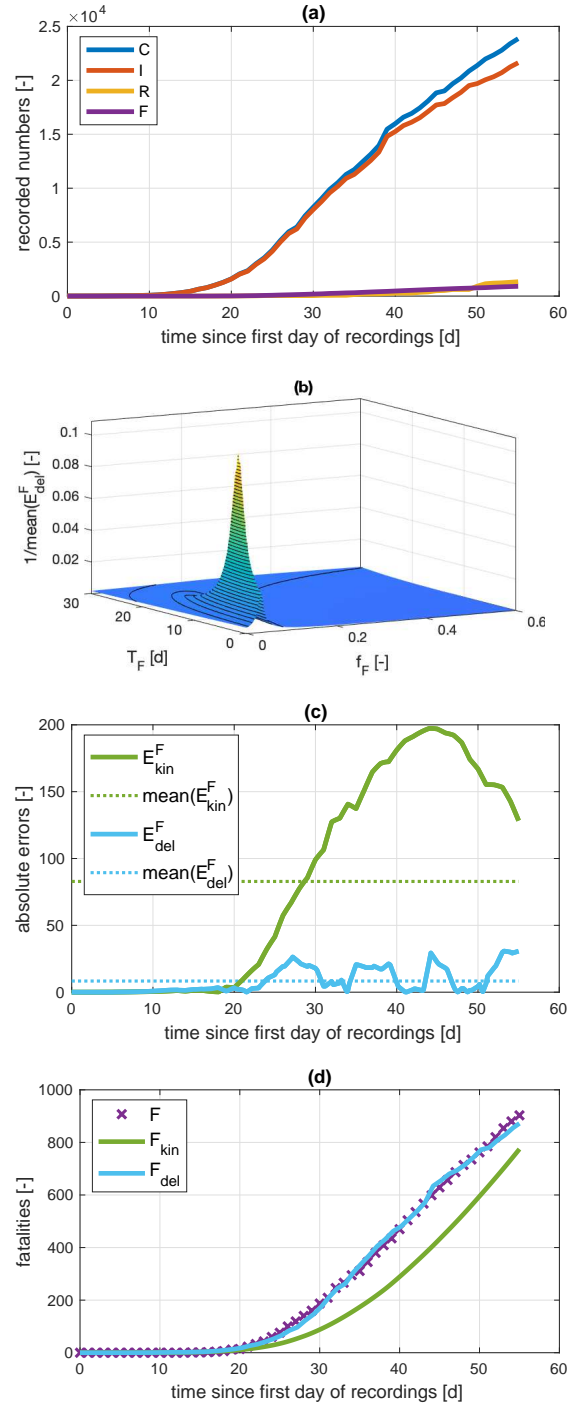

Figure 44: (a) Recorded data, (b) results of optimization based on infection-to-death delay rule, (c) absolute errors based on optimized parameter estimates, and (d) comparison between model-predicted fatalities based on optimized parameter estimates and recorded fatalities for Portugal

Table 45: Data recorded in Romania

| Date   | C     | $\Delta C$ | I    | $\Delta I$ | F   | $\Delta F$ | R    | $\Delta R$ |
|--------|-------|------------|------|------------|-----|------------|------|------------|
| Feb 26 | 1     | 1          | 1    | 1          | 0   | 0          | 0    | 0          |
| Feb 27 | 1     | 0          | 1    | 0          | 0   | 0          | 0    | 0          |
| Feb 28 | 3     | 2          | 2    | 1          | 0   | 0          | 1    | 1          |
| Feb 29 | 3     | 0          | 2    | 0          | 0   | 0          | 1    | 0          |
| Mar 1  | 3     | 0          | 2    | 0          | 0   | 0          | 1    | 0          |
| Mar 2  | 3     | 0          | 2    | 0          | 0   | 0          | 1    | 0          |
| Mar 3  | 4     | 1          | 3    | 1          | 0   | 0          | 1    | 0          |
| Mar 4  | 6     | 2          | 5    | 2          | 0   | 0          | 1    | 0          |
| Mar 5  | 6     | 0          | 3    | -2         | 0   | 0          | 3    | 2          |
| Mar 6  | 9     | 3          | 6    | 3          | 0   | 0          | 3    | 0          |
| Mar 7  | 13    | 4          | 10   | 4          | 0   | 0          | 3    | 0          |
| Mar 8  | 15    | 2          | 10   | 0          | 0   | 0          | 5    | 2          |
| Mar 9  | 17    | 2          | 12   | 2          | 0   | 0          | 5    | 0          |
| Mar 10 | 29    | 12         | 24   | 12         | 0   | 0          | 5    | 0          |
| Mar 11 | 47    | 18         | 41   | 17         | 0   | 0          | 6    | 1          |
| Mar 12 | 59    | 12         | 52   | 11         | 0   | 0          | 7    | 1          |
| Mar 13 | 95    | 36         | 88   | 36         | 0   | 0          | 7    | 0          |
| Mar 14 | 123   | 28         | 114  | 26         | 0   | 0          | 9    | 2          |
| Mar 15 | 134   | 11         | 130  | 16         | 0   | 0          | 4    | -5         |
| Mar 16 | 168   | 34         | 159  | 29         | 0   | 0          | 9    | 5          |
| Mar 17 | 217   | 49         | 198  | 39         | 0   | 0          | 19   | 10         |
| Mar 18 | 260   | 43         | 241  | 43         | 0   | 0          | 19   | 0          |
| Mar 19 | 277   | 17         | 252  | 11         | 0   | 0          | 25   | 6          |
| Mar 20 | 308   | 31         | 277  | 25         | 0   | 0          | 31   | 6          |
| Mar 21 | 367   | 59         | 315  | 38         | 0   | 0          | 52   | 21         |
| Mar 22 | 433   | 66         | 366  | 51         | 3   | 3          | 64   | 12         |
| Mar 23 | 576   | 143        | 496  | 130        | 7   | 4          | 73   | 9          |
| Mar 24 | 794   | 218        | 703  | 207        | 12  | 5          | 79   | 6          |
| Mar 25 | 906   | 112        | 803  | 100        | 17  | 5          | 86   | 7          |
| Mar 26 | 1029  | 123        | 912  | 109        | 23  | 6          | 94   | 8          |
| Mar 27 | 1292  | 263        | 1151 | 239        | 26  | 3          | 115  | 21         |
| Mar 28 | 1452  | 160        | 1276 | 125        | 37  | 11         | 139  | 24         |
| Mar 29 | 1815  | 363        | 1566 | 290        | 43  | 6          | 206  | 67         |
| Mar 30 | 2109  | 294        | 1835 | 269        | 65  | 22         | 209  | 3          |
| Mar 31 | 2245  | 136        | 1943 | 108        | 82  | 17         | 220  | 11         |
| Apr 1  | 2460  | 215        | 2116 | 173        | 92  | 10         | 252  | 32         |
| Apr 2  | 2738  | 278        | 2356 | 240        | 115 | 23         | 267  | 15         |
| Apr 3  | 3183  | 445        | 2767 | 411        | 133 | 18         | 283  | 16         |
| Apr 4  | 3613  | 430        | 3138 | 371        | 146 | 13         | 329  | 46         |
| Apr 5  | 3864  | 251        | 3339 | 201        | 151 | 5          | 374  | 45         |
| Apr 6  | 4057  | 193        | 3475 | 136        | 176 | 25         | 406  | 32         |
| Apr 7  | 4417  | 360        | 3760 | 285        | 197 | 21         | 460  | 54         |
| Apr 8  | 4761  | 344        | 4013 | 253        | 220 | 23         | 528  | 68         |
| Apr 9  | 5202  | 441        | 4307 | 294        | 248 | 28         | 647  | 119        |
| Apr 10 | 5467  | 265        | 4468 | 161        | 270 | 22         | 729  | 82         |
| Apr 11 | 5990  | 523        | 4941 | 473        | 291 | 21         | 758  | 29         |
| Apr 12 | 6300  | 310        | 5132 | 191        | 316 | 25         | 852  | 94         |
| Apr 13 | 6633  | 333        | 5388 | 256        | 331 | 15         | 914  | 62         |
| Apr 14 | 6879  | 246        | 5477 | 89         | 351 | 20         | 1051 | 137        |
| Apr 15 | 7216  | 337        | 5627 | 150        | 372 | 21         | 1217 | 166        |
| Apr 16 | 7707  | 491        | 5958 | 331        | 392 | 20         | 1357 | 140        |
| Apr 17 | 8067  | 360        | 6148 | 190        | 411 | 19         | 1508 | 151        |
| Apr 18 | 8418  | 351        | 6267 | 119        | 421 | 10         | 1730 | 222        |
| Apr 19 | 8746  | 328        | 6403 | 136        | 451 | 30         | 1892 | 162        |
| Apr 20 | 8936  | 190        | 6441 | 38         | 478 | 27         | 2017 | 125        |
| Apr 21 | 9242  | 306        | 6591 | 150        | 498 | 20         | 2153 | 136        |
| Apr 22 | 9710  | 468        | 6780 | 189        | 524 | 26         | 2406 | 253        |
| Apr 23 | 10096 | 386        | 7073 | 293        | 545 | 21         | 2478 | 72         |
| Apr 24 | 10417 | 321        | 7033 | -40        | 567 | 22         | 2817 | 339        |
| Apr 25 | 10635 | 218        | 7144 | 111        | 601 | 34         | 2890 | 73         |
| Apr 26 | 11036 | 401        | 7363 | 219        | 619 | 18         | 3054 | 164        |

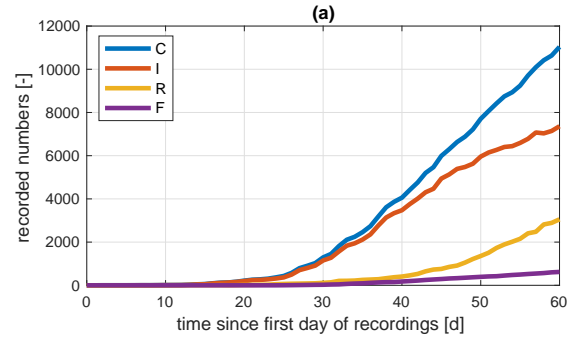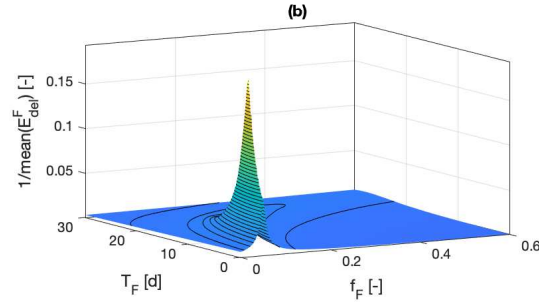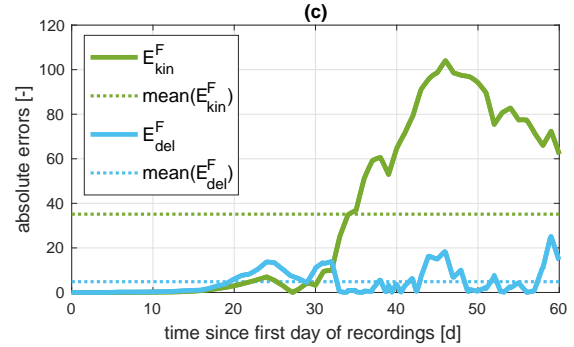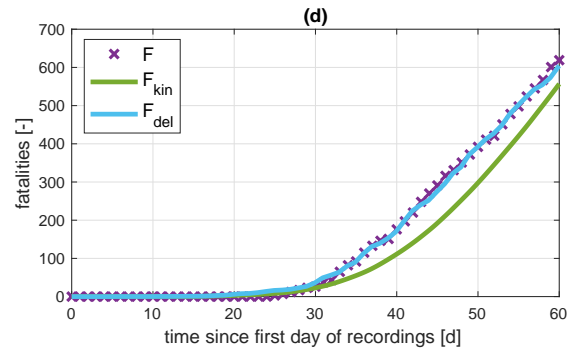

Figure 45: (a) Recorded data, (b) results of optimization based on infection-to-death delay rule, (c) absolute errors based on optimized parameter estimates, and (d) comparison between model-predicted fatalities based on optimized parameter estimates and recorded fatalities for Romania

Table 46: Data recorded in Russia

| Date   | C     | $\Delta C$ | I     | $\Delta I$ | F   | $\Delta F$ | R    | $\Delta R$ |
|--------|-------|------------|-------|------------|-----|------------|------|------------|
| Feb 15 | 2     | 2          | 0     | 0          | 0   | 0          | 2    | 2          |
| Feb 16 | 2     | 0          | 0     | 0          | 0   | 0          | 2    | 0          |
| Feb 17 | 2     | 0          | 0     | 0          | 0   | 0          | 2    | 0          |
| Feb 18 | 2     | 0          | 0     | 0          | 0   | 0          | 2    | 0          |
| Feb 19 | 2     | 0          | 0     | 0          | 0   | 0          | 2    | 0          |
| Feb 20 | 2     | 0          | 0     | 0          | 0   | 0          | 2    | 0          |
| Feb 21 | 2     | 0          | 0     | 0          | 0   | 0          | 2    | 0          |
| Feb 22 | 2     | 0          | 0     | 0          | 0   | 0          | 2    | 0          |
| Feb 23 | 2     | 0          | 0     | 0          | 0   | 0          | 2    | 0          |
| Feb 24 | 2     | 0          | 0     | 0          | 0   | 0          | 2    | 0          |
| Feb 25 | 2     | 0          | 0     | 0          | 0   | 0          | 2    | 0          |
| Feb 26 | 2     | 0          | 0     | 0          | 0   | 0          | 2    | 0          |
| Feb 27 | 2     | 0          | 0     | 0          | 0   | 0          | 2    | 0          |
| Feb 28 | 2     | 0          | 0     | 0          | 0   | 0          | 2    | 0          |
| Feb 29 | 2     | 0          | 0     | 0          | 0   | 0          | 2    | 0          |
| Mar 1  | 2     | 0          | 0     | 0          | 0   | 0          | 2    | 0          |
| Mar 2  | 3     | 1          | 1     | 1          | 0   | 0          | 2    | 0          |
| Mar 3  | 3     | 0          | 1     | 0          | 0   | 0          | 2    | 0          |
| Mar 4  | 3     | 0          | 1     | 0          | 0   | 0          | 2    | 0          |
| Mar 5  | 7     | 4          | 5     | 4          | 0   | 0          | 2    | 0          |
| Mar 6  | 13    | 6          | 11    | 6          | 0   | 0          | 2    | 0          |
| Mar 7  | 14    | 1          | 11    | 0          | 0   | 0          | 3    | 1          |
| Mar 8  | 17    | 3          | 14    | 3          | 0   | 0          | 3    | 0          |
| Mar 9  | 20    | 3          | 17    | 3          | 0   | 0          | 3    | 0          |
| Mar 10 | 20    | 0          | 17    | 0          | 0   | 0          | 3    | 0          |
| Mar 11 | 28    | 8          | 25    | 8          | 0   | 0          | 3    | 0          |
| Mar 12 | 34    | 6          | 31    | 6          | 0   | 0          | 3    | 0          |
| Mar 13 | 45    | 11         | 37    | 6          | 0   | 0          | 8    | 5          |
| Mar 14 | 59    | 14         | 51    | 14         | 0   | 0          | 8    | 0          |
| Mar 15 | 63    | 4          | 55    | 4          | 0   | 0          | 8    | 0          |
| Mar 16 | 93    | 30         | 85    | 30         | 0   | 0          | 8    | 0          |
| Mar 17 | 114   | 21         | 106   | 21         | 0   | 0          | 8    | 0          |
| Mar 18 | 147   | 33         | 139   | 33         | 0   | 0          | 8    | 0          |
| Mar 19 | 199   | 52         | 190   | 51         | 1   | 1          | 8    | 0          |
| Mar 20 | 253   | 54         | 240   | 50         | 1   | 0          | 12   | 4          |
| Mar 21 | 306   | 53         | 289   | 49         | 1   | 0          | 16   | 4          |
| Mar 22 | 367   | 61         | 350   | 61         | 1   | 0          | 16   | 0          |
| Mar 23 | 438   | 71         | 420   | 70         | 1   | 0          | 17   | 1          |
| Mar 24 | 495   | 57         | 472   | 52         | 1   | 0          | 22   | 5          |
| Mar 25 | 658   | 163        | 626   | 154        | 3   | 2          | 29   | 7          |
| Mar 26 | 840   | 182        | 799   | 173        | 3   | 0          | 38   | 9          |
| Mar 27 | 1036  | 196        | 987   | 188        | 4   | 1          | 45   | 7          |
| Mar 28 | 1264  | 228        | 1211  | 224        | 4   | 0          | 49   | 4          |
| Mar 29 | 1534  | 270        | 1462  | 251        | 8   | 4          | 64   | 15         |
| Mar 30 | 1836  | 302        | 1761  | 299        | 9   | 1          | 66   | 2          |
| Mar 31 | 2337  | 501        | 2199  | 438        | 17  | 8          | 121  | 55         |
| Apr 1  | 2777  | 440        | 2563  | 364        | 24  | 7          | 190  | 69         |
| Apr 2  | 3548  | 771        | 3283  | 720        | 30  | 6          | 235  | 45         |
| Apr 3  | 4149  | 601        | 3834  | 551        | 34  | 4          | 281  | 46         |
| Apr 4  | 4731  | 582        | 4355  | 521        | 43  | 9          | 333  | 52         |
| Apr 5  | 5389  | 658        | 4989  | 634        | 45  | 2          | 355  | 22         |
| Apr 6  | 6343  | 954        | 5890  | 901        | 47  | 2          | 406  | 51         |
| Apr 7  | 7497  | 1154       | 6945  | 1055       | 58  | 11         | 494  | 88         |
| Apr 8  | 8672  | 1175       | 8029  | 1084       | 63  | 5          | 580  | 86         |
| Apr 9  | 10131 | 1459       | 9357  | 1328       | 76  | 13         | 698  | 118        |
| Apr 10 | 11917 | 1786       | 11028 | 1671       | 94  | 18         | 795  | 97         |
| Apr 11 | 13584 | 1667       | 12433 | 1405       | 106 | 12         | 1045 | 250        |
| Apr 12 | 15770 | 2186       | 14349 | 1916       | 130 | 24         | 1291 | 246        |
| Apr 13 | 18328 | 2558       | 16710 | 2361       | 148 | 18         | 1470 | 179        |
| Apr 14 | 21102 | 2774       | 19238 | 2528       | 170 | 22         | 1694 | 224        |
| Apr 15 | 24490 | 3388       | 22306 | 3068       | 198 | 28         | 1986 | 292        |
| Apr 16 | 27938 | 3448       | 25402 | 3096       | 232 | 34         | 2304 | 318        |
| Apr 17 | 32008 | 4070       | 29145 | 3743       | 273 | 41         | 2590 | 286        |
| Apr 18 | 36793 | 4785       | 33423 | 4278       | 313 | 40         | 3057 | 467        |
| Apr 19 | 42853 | 6060       | 39201 | 5778       | 361 | 48         | 3291 | 234        |
| Apr 20 | 47121 | 4268       | 43270 | 4069       | 405 | 44         | 3446 | 155        |
| Apr 21 | 52763 | 5642       | 48434 | 5164       | 456 | 51         | 3873 | 427        |
| Apr 22 | 57999 | 5236       | 53066 | 4632       | 513 | 57         | 4420 | 547        |
| Apr 23 | 62773 | 4774       | 57327 | 4261       | 555 | 42         | 4891 | 471        |
| Apr 24 | 68622 | 5849       | 62439 | 5112       | 615 | 60         | 5568 | 677        |
| Apr 25 | 74588 | 5966       | 67657 | 5218       | 681 | 66         | 6250 | 682        |
| Apr 26 | 80949 | 6361       | 73435 | 5778       | 747 | 66         | 6767 | 517        |

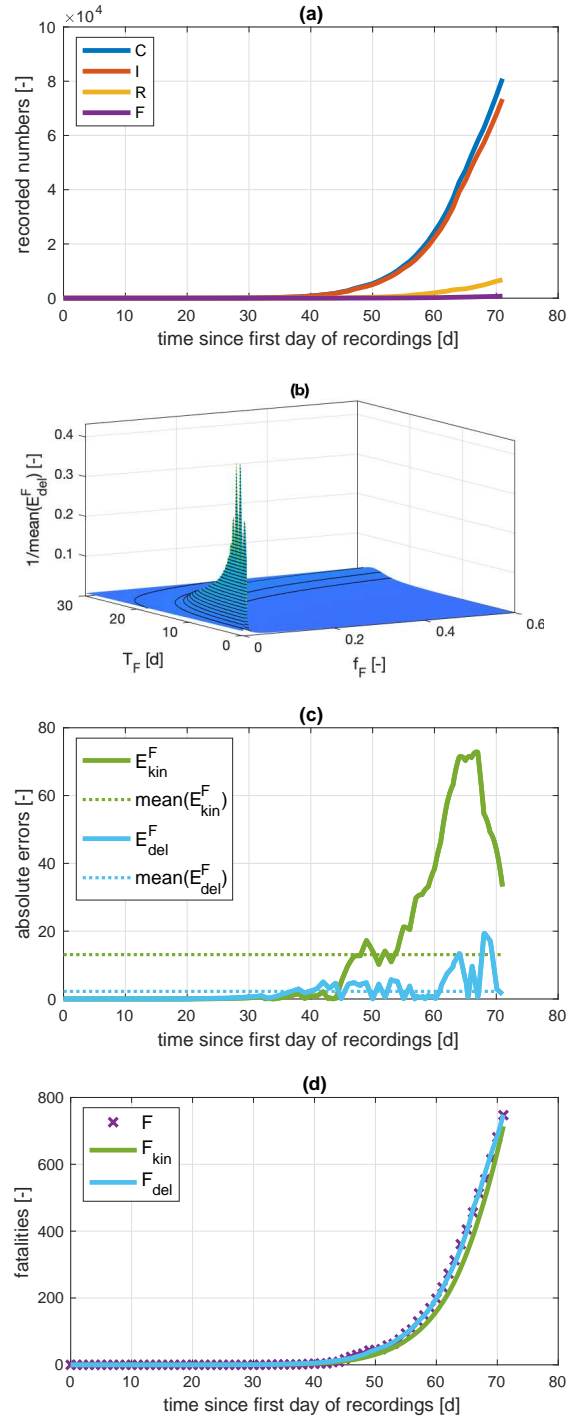

Figure 46: (a) Recorded data, (b) results of optimization based on infection-to-death delay rule, (c) absolute errors based on optimized parameter estimates, and (d) comparison between model-predicted fatalities based on optimized parameter estimates and recorded fatalities for Russia

Table 47: Data recorded in Saudi Arabia

| Date   | $C$   | $\Delta C$ | $I$   | $\Delta I$ | $F$ | $\Delta F$ | $R$  | $\Delta R$ |
|--------|-------|------------|-------|------------|-----|------------|------|------------|
| Mar 2  | 1     | 1          | 1     | 1          | 0   | 0          | 0    | 0          |
| Mar 3  | 1     | 0          | 1     | 0          | 0   | 0          | 0    | 0          |
| Mar 4  | 2     | 1          | 2     | 1          | 0   | 0          | 0    | 0          |
| Mar 5  | 5     | 3          | 4     | 2          | 0   | 0          | 1    | 1          |
| Mar 6  | 5     | 0          | 4     | 0          | 0   | 0          | 1    | 0          |
| Mar 7  | 7     | 2          | 6     | 2          | 0   | 0          | 1    | 0          |
| Mar 8  | 11    | 4          | 10    | 4          | 0   | 0          | 1    | 0          |
| Mar 9  | 20    | 9          | 19    | 9          | 0   | 0          | 1    | 0          |
| Mar 10 | 20    | 0          | 19    | 0          | 0   | 0          | 1    | 0          |
| Mar 11 | 45    | 25         | 44    | 25         | 0   | 0          | 1    | 0          |
| Mar 12 | 45    | 0          | 44    | 0          | 0   | 0          | 1    | 0          |
| Mar 13 | 86    | 41         | 85    | 41         | 0   | 0          | 1    | 0          |
| Mar 14 | 103   | 17         | 102   | 17         | 0   | 0          | 1    | 0          |
| Mar 15 | 118   | 15         | 115   | 13         | 0   | 0          | 3    | 2          |
| Mar 16 | 133   | 15         | 127   | 12         | 0   | 0          | 6    | 3          |
| Mar 17 | 171   | 38         | 165   | 38         | 0   | 0          | 6    | 0          |
| Mar 18 | 238   | 67         | 232   | 67         | 0   | 0          | 6    | 0          |
| Mar 19 | 274   | 36         | 266   | 34         | 0   | 0          | 8    | 2          |
| Mar 20 | 344   | 70         | 336   | 70         | 0   | 0          | 8    | 0          |
| Mar 21 | 392   | 48         | 376   | 40         | 0   | 0          | 16   | 8          |
| Mar 22 | 511   | 119        | 494   | 118        | 0   | 0          | 17   | 1          |
| Mar 23 | 562   | 51         | 543   | 49         | 0   | 0          | 19   | 2          |
| Mar 24 | 767   | 205        | 738   | 195        | 1   | 1          | 28   | 9          |
| Mar 25 | 900   | 133        | 869   | 131        | 2   | 1          | 29   | 1          |
| Mar 26 | 1012  | 112        | 976   | 107        | 3   | 1          | 33   | 4          |
| Mar 27 | 1104  | 92         | 1066  | 90         | 3   | 0          | 35   | 2          |
| Mar 28 | 1203  | 99         | 1162  | 96         | 4   | 1          | 37   | 2          |
| Mar 29 | 1299  | 96         | 1225  | 63         | 8   | 4          | 66   | 29         |
| Mar 30 | 1453  | 154        | 1330  | 105        | 8   | 0          | 115  | 49         |
| Mar 31 | 1563  | 110        | 1388  | 58         | 10  | 2          | 165  | 50         |
| Apr 1  | 1720  | 157        | 1440  | 52         | 16  | 6          | 264  | 99         |
| Apr 2  | 1885  | 165        | 1536  | 96         | 21  | 5          | 328  | 64         |
| Apr 3  | 2039  | 154        | 1663  | 127        | 25  | 4          | 351  | 23         |
| Apr 4  | 2179  | 140        | 1730  | 67         | 29  | 4          | 420  | 69         |
| Apr 5  | 2402  | 223        | 1880  | 150        | 34  | 5          | 488  | 68         |
| Apr 6  | 2605  | 203        | 2016  | 136        | 38  | 4          | 551  | 63         |
| Apr 7  | 2795  | 190        | 2139  | 123        | 41  | 3          | 615  | 64         |
| Apr 8  | 2932  | 137        | 2260  | 121        | 41  | 0          | 631  | 16         |
| Apr 9  | 3287  | 355        | 2577  | 317        | 44  | 3          | 666  | 35         |
| Apr 10 | 3651  | 364        | 2919  | 342        | 47  | 3          | 685  | 19         |
| Apr 11 | 4033  | 382        | 3261  | 342        | 52  | 5          | 720  | 35         |
| Apr 12 | 4462  | 429        | 3642  | 381        | 59  | 7          | 761  | 41         |
| Apr 13 | 4934  | 472        | 4064  | 422        | 65  | 6          | 805  | 44         |
| Apr 14 | 5369  | 435        | 4407  | 343        | 73  | 8          | 889  | 84         |
| Apr 15 | 5862  | 493        | 4852  | 445        | 79  | 6          | 931  | 42         |
| Apr 16 | 6380  | 518        | 5307  | 455        | 83  | 4          | 990  | 59         |
| Apr 17 | 7142  | 762        | 6006  | 699        | 87  | 4          | 1049 | 59         |
| Apr 18 | 8274  | 1132       | 6853  | 847        | 92  | 5          | 1329 | 280        |
| Apr 19 | 9362  | 1088       | 7867  | 1014       | 97  | 5          | 1398 | 69         |
| Apr 20 | 10484 | 1122       | 8891  | 1024       | 103 | 6          | 1490 | 92         |
| Apr 21 | 11631 | 1147       | 9882  | 991        | 109 | 6          | 1640 | 150        |
| Apr 22 | 12772 | 1141       | 10846 | 964        | 114 | 5          | 1812 | 172        |
| Apr 23 | 13930 | 1158       | 11884 | 1038       | 121 | 7          | 1925 | 113        |
| Apr 24 | 15102 | 1172       | 12926 | 1042       | 127 | 6          | 2049 | 124        |
| Apr 25 | 16299 | 1197       | 13948 | 1022       | 136 | 9          | 2215 | 166        |
| Apr 26 | 17522 | 1223       | 15026 | 1078       | 139 | 3          | 2357 | 142        |

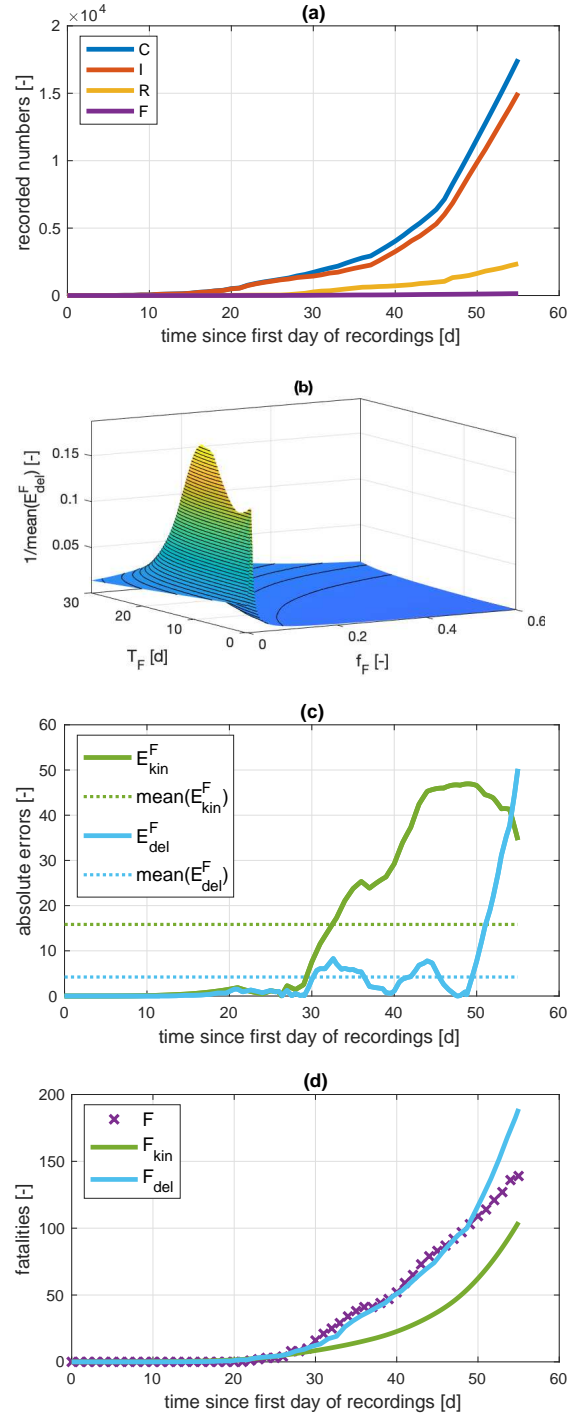

Figure 47: (a) Recorded data, (b) results of optimization based on infection-to-death delay rule, (c) absolute errors based on optimized parameter estimates, and (d) comparison between model-predicted fatalities based on optimized parameter estimates and recorded fatalities for Saudi Arabia

Table 48: Data recorded in Serbia

| Date   | C    | $\Delta C$ | I    | $\Delta I$ | F   | $\Delta F$ | R    | $\Delta R$ |
|--------|------|------------|------|------------|-----|------------|------|------------|
| Mar 6  | 1    | 1          | 1    | 1          | 0   | 0          | 0    | 0          |
| Mar 7  | 1    | 0          | 1    | 0          | 0   | 0          | 0    | 0          |
| Mar 8  | 1    | 0          | 1    | 0          | 0   | 0          | 0    | 0          |
| Mar 9  | 2    | 1          | 2    | 1          | 0   | 0          | 0    | 0          |
| Mar 10 | 5    | 3          | 5    | 3          | 0   | 0          | 0    | 0          |
| Mar 11 | 18   | 13         | 18   | 13         | 0   | 0          | 0    | 0          |
| Mar 12 | 24   | 6          | 24   | 6          | 0   | 0          | 0    | 0          |
| Mar 13 | 35   | 11         | 35   | 11         | 0   | 0          | 0    | 0          |
| Mar 14 | 46   | 11         | 46   | 11         | 0   | 0          | 0    | 0          |
| Mar 15 | 48   | 2          | 47   | 1          | 0   | 0          | 1    | 1          |
| Mar 16 | 57   | 9          | 56   | 9          | 0   | 0          | 1    | 0          |
| Mar 17 | 72   | 15         | 71   | 15         | 0   | 0          | 1    | 0          |
| Mar 18 | 89   | 17         | 88   | 17         | 0   | 0          | 1    | 0          |
| Mar 19 | 103  | 14         | 102  | 14         | 0   | 0          | 1    | 0          |
| Mar 20 | 135  | 32         | 132  | 30         | 1   | 1          | 2    | 1          |
| Mar 21 | 171  | 36         | 168  | 36         | 1   | 0          | 2    | 0          |
| Mar 22 | 222  | 51         | 218  | 50         | 2   | 1          | 2    | 0          |
| Mar 23 | 249  | 27         | 243  | 25         | 3   | 1          | 3    | 1          |
| Mar 24 | 303  | 54         | 285  | 42         | 3   | 0          | 15   | 12         |
| Mar 25 | 384  | 81         | 365  | 80         | 4   | 1          | 15   | 0          |
| Mar 26 | 457  | 73         | 435  | 70         | 7   | 3          | 15   | 0          |
| Mar 27 | 528  | 71         | 478  | 43         | 8   | 1          | 42   | 27         |
| Mar 28 | 659  | 131        | 607  | 129        | 10  | 2          | 42   | 0          |
| Mar 29 | 741  | 82         | 686  | 79         | 13  | 3          | 42   | 0          |
| Mar 30 | 785  | 44         | 727  | 41         | 16  | 3          | 42   | 0          |
| Mar 31 | 900  | 115        | 835  | 108        | 23  | 7          | 42   | 0          |
| Apr 1  | 1060 | 160        | 990  | 155        | 28  | 5          | 42   | 0          |
| Apr 2  | 1171 | 111        | 1098 | 108        | 31  | 3          | 42   | 0          |
| Apr 3  | 1476 | 305        | 1383 | 285        | 39  | 8          | 54   | 12         |
| Apr 4  | 1624 | 148        | 1526 | 143        | 44  | 5          | 54   | 0          |
| Apr 5  | 1908 | 284        | 1803 | 277        | 51  | 7          | 54   | 0          |
| Apr 6  | 2200 | 292        | 2024 | 221        | 58  | 7          | 118  | 64         |
| Apr 7  | 2447 | 247        | 2268 | 244        | 61  | 3          | 118  | 0          |
| Apr 8  | 2666 | 219        | 2483 | 215        | 65  | 4          | 118  | 0          |
| Apr 9  | 2867 | 201        | 2683 | 200        | 66  | 1          | 118  | 0          |
| Apr 10 | 3105 | 238        | 2916 | 233        | 71  | 5          | 118  | 0          |
| Apr 11 | 3380 | 275        | 3188 | 272        | 74  | 3          | 118  | 0          |
| Apr 12 | 3630 | 250        | 3150 | -38        | 80  | 6          | 400  | 282        |
| Apr 13 | 4054 | 424        | 3569 | 419        | 85  | 5          | 400  | 0          |
| Apr 14 | 4465 | 411        | 3971 | 402        | 94  | 9          | 400  | 0          |
| Apr 15 | 4873 | 408        | 4374 | 403        | 99  | 5          | 400  | 0          |
| Apr 16 | 5318 | 445        | 4772 | 398        | 103 | 4          | 443  | 43         |
| Apr 17 | 5690 | 372        | 5046 | 274        | 110 | 7          | 534  | 91         |
| Apr 18 | 5994 | 304        | 5240 | 194        | 117 | 7          | 637  | 103        |
| Apr 19 | 6318 | 324        | 5443 | 203        | 122 | 5          | 753  | 116        |
| Apr 20 | 6630 | 312        | 5635 | 192        | 125 | 3          | 870  | 117        |
| Apr 21 | 6890 | 260        | 5783 | 148        | 130 | 5          | 977  | 107        |
| Apr 22 | 7114 | 224        | 5955 | 172        | 134 | 4          | 1025 | 48         |
| Apr 23 | 7276 | 162        | 6074 | 119        | 139 | 5          | 1063 | 38         |
| Apr 24 | 7483 | 207        | 6245 | 171        | 144 | 5          | 1094 | 31         |
| Apr 25 | 7779 | 296        | 6476 | 231        | 151 | 7          | 1152 | 58         |
| Apr 26 | 8042 | 263        | 6704 | 228        | 156 | 5          | 1182 | 30         |

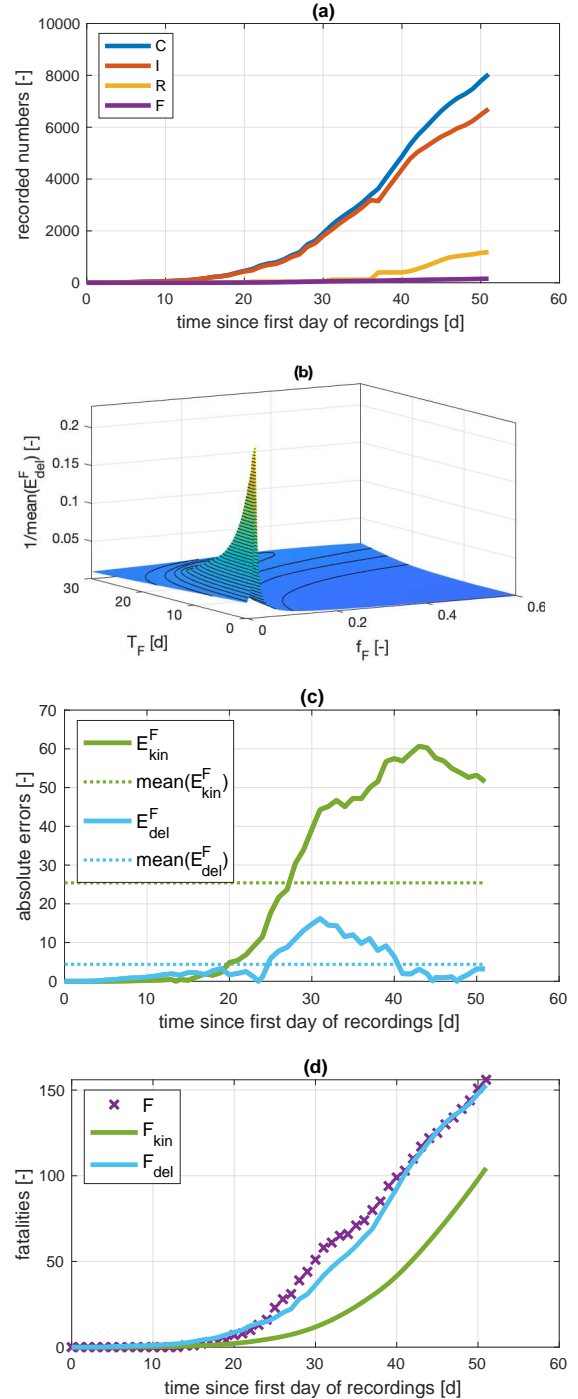

Figure 48: (a) Recorded data, (b) results of optimization based on infection-to-death delay rule, (c) absolute errors based on optimized parameter estimates, and (d) comparison between model-predicted fatalities based on optimized parameter estimates and recorded fatalities for Serbia

Table 49: Data recorded in South Africa

| Date   | $C$  | $\Delta C$ | $I$  | $\Delta I$ | $F$ | $\Delta F$ | $R$  | $\Delta R$ |
|--------|------|------------|------|------------|-----|------------|------|------------|
| Mar 5  | 1    | 1          | 1    | 1          | 0   | 0          | 0    | 0          |
| Mar 6  | 1    | 0          | 1    | 0          | 0   | 0          | 0    | 0          |
| Mar 7  | 2    | 1          | 2    | 1          | 0   | 0          | 0    | 0          |
| Mar 8  | 3    | 1          | 3    | 1          | 0   | 0          | 0    | 0          |
| Mar 9  | 7    | 4          | 7    | 4          | 0   | 0          | 0    | 0          |
| Mar 10 | 7    | 0          | 7    | 0          | 0   | 0          | 0    | 0          |
| Mar 11 | 13   | 6          | 13   | 6          | 0   | 0          | 0    | 0          |
| Mar 12 | 16   | 3          | 16   | 3          | 0   | 0          | 0    | 0          |
| Mar 13 | 24   | 8          | 24   | 8          | 0   | 0          | 0    | 0          |
| Mar 14 | 38   | 14         | 38   | 14         | 0   | 0          | 0    | 0          |
| Mar 15 | 61   | 23         | 61   | 23         | 0   | 0          | 0    | 0          |
| Mar 16 | 64   | 3          | 64   | 3          | 0   | 0          | 0    | 0          |
| Mar 17 | 85   | 21         | 85   | 21         | 0   | 0          | 0    | 0          |
| Mar 18 | 116  | 31         | 116  | 31         | 0   | 0          | 0    | 0          |
| Mar 19 | 150  | 34         | 150  | 34         | 0   | 0          | 0    | 0          |
| Mar 20 | 202  | 52         | 202  | 52         | 0   | 0          | 0    | 0          |
| Mar 21 | 240  | 38         | 238  | 36         | 0   | 0          | 2    | 2          |
| Mar 22 | 274  | 34         | 272  | 34         | 0   | 0          | 2    | 0          |
| Mar 23 | 402  | 128        | 398  | 126        | 0   | 0          | 4    | 2          |
| Mar 24 | 554  | 152        | 550  | 152        | 0   | 0          | 4    | 0          |
| Mar 25 | 709  | 155        | 697  | 147        | 0   | 0          | 12   | 8          |
| Mar 26 | 927  | 218        | 915  | 218        | 0   | 0          | 12   | 0          |
| Mar 27 | 1170 | 243        | 1138 | 223        | 1   | 1          | 31   | 19         |
| Mar 28 | 1187 | 17         | 1155 | 17         | 1   | 0          | 31   | 0          |
| Mar 29 | 1280 | 93         | 1247 | 92         | 2   | 1          | 31   | 0          |
| Mar 30 | 1326 | 46         | 1292 | 45         | 3   | 1          | 31   | 0          |
| Mar 31 | 1353 | 27         | 1317 | 25         | 5   | 2          | 31   | 0          |
| Apr 1  | 1380 | 27         | 1325 | 8          | 5   | 0          | 50   | 19         |
| Apr 2  | 1462 | 82         | 1407 | 82         | 5   | 0          | 50   | 0          |
| Apr 3  | 1505 | 43         | 1401 | -6         | 9   | 4          | 95   | 45         |
| Apr 4  | 1585 | 80         | 1481 | 80         | 9   | 0          | 95   | 0          |
| Apr 5  | 1655 | 70         | 1549 | 68         | 11  | 2          | 95   | 0          |
| Apr 6  | 1686 | 31         | 1579 | 30         | 12  | 1          | 95   | 0          |
| Apr 7  | 1749 | 63         | 1641 | 62         | 13  | 1          | 95   | 0          |
| Apr 8  | 1845 | 96         | 1732 | 91         | 18  | 5          | 95   | 0          |
| Apr 9  | 1934 | 89         | 1821 | 89         | 18  | 0          | 95   | 0          |
| Apr 10 | 2003 | 69         | 1569 | -252       | 24  | 6          | 410  | 315        |
| Apr 11 | 2028 | 25         | 1593 | 24         | 25  | 1          | 410  | 0          |
| Apr 12 | 2173 | 145        | 1738 | 145        | 25  | 0          | 410  | 0          |
| Apr 13 | 2272 | 99         | 1835 | 97         | 27  | 2          | 410  | 0          |
| Apr 14 | 2415 | 143        | 1978 | 143        | 27  | 0          | 410  | 0          |
| Apr 15 | 2506 | 91         | 2062 | 84         | 34  | 7          | 410  | 0          |
| Apr 16 | 2605 | 99         | 1654 | -408       | 48  | 14         | 903  | 493        |
| Apr 17 | 2783 | 178        | 1830 | 176        | 50  | 2          | 903  | 0          |
| Apr 18 | 3034 | 251        | 2079 | 249        | 52  | 2          | 903  | 0          |
| Apr 19 | 3158 | 124        | 2201 | 122        | 54  | 2          | 903  | 0          |
| Apr 20 | 3300 | 142        | 2187 | -14        | 58  | 4          | 1055 | 152        |
| Apr 21 | 3465 | 165        | 2352 | 165        | 58  | 0          | 1055 | 0          |
| Apr 22 | 3635 | 170        | 2515 | 163        | 65  | 7          | 1055 | 0          |
| Apr 23 | 3953 | 318        | 2405 | -110       | 75  | 10         | 1473 | 418        |
| Apr 24 | 4220 | 267        | 2668 | 263        | 79  | 4          | 1473 | 0          |
| Apr 25 | 4361 | 141        | 2802 | 134        | 86  | 7          | 1473 | 0          |
| Apr 26 | 4546 | 185        | 2986 | 184        | 87  | 1          | 1473 | 0          |

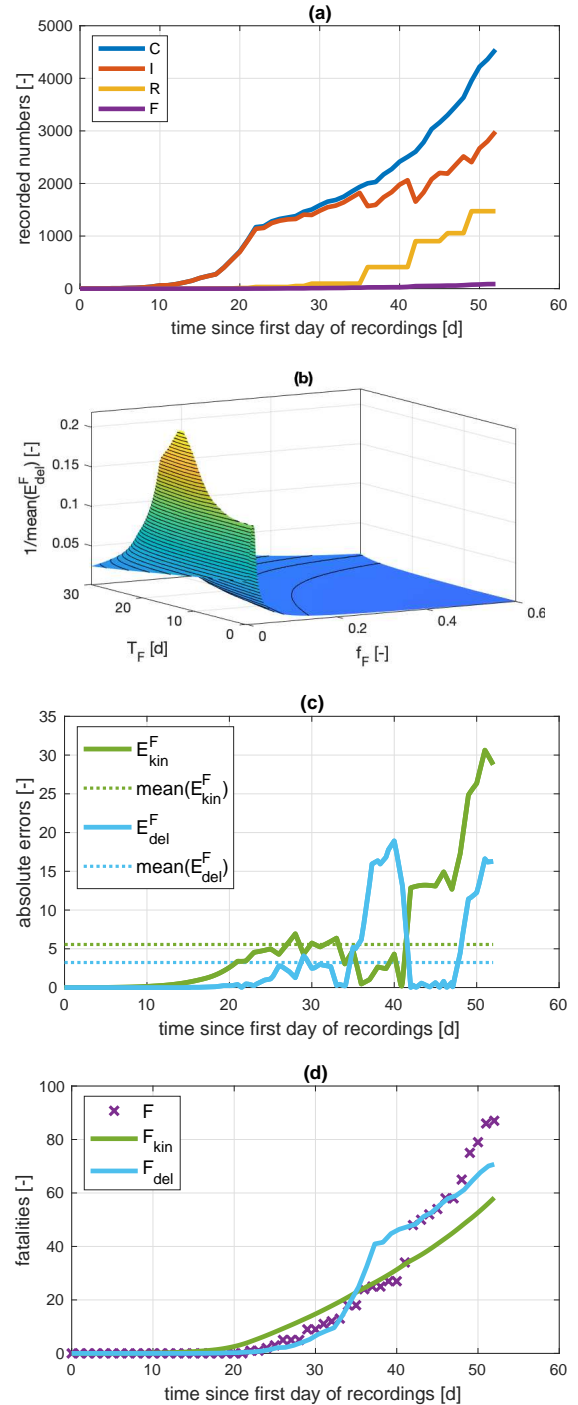

Figure 49: (a) Recorded data, (b) results of optimization based on infection-to-death delay rule, (c) absolute errors based on optimized parameter estimates, and (d) comparison between model-predicted fatalities based on optimized parameter estimates and recorded fatalities for South Africa



Table 50: Data recorded in South Korea

| Date   | $C$   | $\Delta C$ | $I$  | $\Delta I$ | $F$ | $\Delta F$ | $R$  | $\Delta R$ |
|--------|-------|------------|------|------------|-----|------------|------|------------|
| Feb 15 | 28    | 28         | 19   | 19         | 0   | 0          | 9    | 9          |
| Feb 16 | 29    | 1          | 20   | 1          | 0   | 0          | 9    | 0          |
| Feb 17 | 30    | 1          | 20   | 0          | 0   | 0          | 10   | 1          |
| Feb 18 | 31    | 1          | 19   | -1         | 0   | 0          | 12   | 2          |
| Feb 19 | 58    | 27         | 42   | 23         | 0   | 0          | 16   | 4          |
| Feb 20 | 111   | 53         | 94   | 52         | 1   | 1          | 16   | 0          |
| Feb 21 | 209   | 98         | 190  | 96         | 2   | 1          | 17   | 1          |
| Feb 22 | 436   | 227        | 416  | 226        | 2   | 0          | 18   | 1          |
| Feb 23 | 602   | 166        | 578  | 162        | 6   | 4          | 18   | 0          |
| Feb 24 | 833   | 231        | 803  | 225        | 8   | 2          | 22   | 4          |
| Feb 25 | 977   | 144        | 944  | 141        | 11  | 3          | 22   | 0          |
| Feb 26 | 1261  | 284        | 1225 | 281        | 12  | 1          | 24   | 2          |
| Feb 27 | 1766  | 505        | 1729 | 504        | 13  | 1          | 24   | 0          |
| Feb 28 | 2337  | 571        | 2297 | 568        | 16  | 3          | 24   | 0          |
| Feb 29 | 3150  | 813        | 3109 | 812        | 17  | 1          | 24   | 0          |
| Mar 1  | 3736  | 586        | 3685 | 576        | 21  | 4          | 30   | 6          |
| Mar 2  | 4335  | 599        | 4277 | 592        | 28  | 7          | 30   | 0          |
| Mar 3  | 5186  | 851        | 5120 | 843        | 32  | 4          | 34   | 4          |
| Mar 4  | 5621  | 435        | 5498 | 378        | 35  | 3          | 88   | 54         |
| Mar 5  | 6284  | 663        | 6107 | 609        | 42  | 7          | 135  | 47         |
| Mar 6  | 6593  | 309        | 6415 | 308        | 43  | 1          | 135  | 0          |
| Mar 7  | 7041  | 448        | 6875 | 460        | 48  | 5          | 118  | -17        |
| Mar 8  | 7313  | 272        | 7097 | 222        | 50  | 2          | 166  | 48         |
| Mar 9  | 7478  | 165        | 7178 | 81         | 53  | 3          | 247  | 81         |
| Mar 10 | 7513  | 35         | 7165 | -13        | 60  | 7          | 288  | 41         |
| Mar 11 | 7755  | 242        | 7362 | 197        | 61  | 1          | 332  | 44         |
| Mar 12 | 7869  | 114        | 7293 | -69        | 66  | 5          | 510  | 178        |
| Mar 13 | 7979  | 110        | 7198 | -95        | 67  | 1          | 714  | 204        |
| Mar 14 | 8086  | 107        | 7180 | -18        | 72  | 5          | 834  | 120        |
| Mar 15 | 8162  | 76         | 7253 | 73         | 75  | 3          | 834  | 0          |
| Mar 16 | 8236  | 74         | 7024 | -229       | 76  | 1          | 1136 | 302        |
| Mar 17 | 8320  | 84         | 6838 | -186       | 81  | 5          | 1401 | 265        |
| Mar 18 | 8413  | 93         | 6789 | -49        | 84  | 3          | 1540 | 139        |
| Mar 19 | 8565  | 152        | 6527 | -262       | 91  | 7          | 1947 | 407        |
| Mar 20 | 8652  | 87         | 6325 | -202       | 94  | 3          | 2233 | 286        |
| Mar 21 | 8766  | 114        | 6085 | -240       | 102 | 8          | 2579 | 346        |
| Mar 22 | 8897  | 131        | 5884 | -201       | 104 | 2          | 2909 | 330        |
| Mar 23 | 8961  | 64         | 5684 | -200       | 111 | 7          | 3166 | 257        |
| Mar 24 | 9037  | 76         | 5410 | -274       | 120 | 9          | 3507 | 341        |
| Mar 25 | 9137  | 100        | 5281 | -129       | 126 | 6          | 3730 | 223        |
| Mar 26 | 9241  | 104        | 4966 | -315       | 131 | 5          | 4144 | 414        |
| Mar 27 | 9332  | 91         | 4665 | -301       | 139 | 8          | 4528 | 384        |
| Mar 28 | 9478  | 146        | 4523 | -142       | 144 | 5          | 4811 | 283        |
| Mar 29 | 9583  | 105        | 4398 | -125       | 152 | 8          | 5033 | 222        |
| Mar 30 | 9661  | 78         | 4275 | -123       | 158 | 6          | 5228 | 195        |
| Mar 31 | 9786  | 125        | 4216 | -59        | 162 | 4          | 5408 | 180        |
| Apr 1  | 9887  | 101        | 4155 | -61        | 165 | 3          | 5567 | 159        |
| Apr 2  | 9976  | 89         | 3979 | -176       | 169 | 4          | 5828 | 261        |
| Apr 3  | 10062 | 86         | 3867 | -112       | 174 | 5          | 6021 | 193        |
| Apr 4  | 10156 | 94         | 3654 | -213       | 177 | 3          | 6325 | 304        |
| Apr 5  | 10237 | 81         | 3591 | -63        | 183 | 6          | 6463 | 138        |
| Apr 6  | 10284 | 47         | 3500 | -91        | 186 | 3          | 6598 | 135        |
| Apr 7  | 10331 | 47         | 3445 | -55        | 192 | 6          | 6694 | 96         |
| Apr 8  | 10384 | 53         | 3408 | -37        | 200 | 8          | 6776 | 82         |
| Apr 9  | 10423 | 39         | 3246 | -162       | 204 | 4          | 6973 | 197        |
| Apr 10 | 10450 | 27         | 3125 | -121       | 208 | 4          | 7117 | 144        |
| Apr 11 | 10480 | 30         | 3026 | -99        | 211 | 3          | 7243 | 126        |
| Apr 12 | 10512 | 32         | 2930 | -96        | 214 | 3          | 7368 | 125        |
| Apr 13 | 10537 | 25         | 2873 | -57        | 217 | 3          | 7447 | 79         |
| Apr 14 | 10564 | 27         | 2808 | -65        | 222 | 5          | 7534 | 87         |
| Apr 15 | 10591 | 27         | 2750 | -58        | 225 | 3          | 7616 | 82         |
| Apr 16 | 10613 | 22         | 2627 | -123       | 229 | 4          | 7757 | 141        |
| Apr 17 | 10635 | 22         | 2576 | -51        | 230 | 1          | 7829 | 72         |
| Apr 18 | 10653 | 18         | 2484 | -92        | 232 | 2          | 7937 | 108        |
| Apr 19 | 10661 | 8          | 2385 | -99        | 234 | 2          | 8042 | 105        |
| Apr 20 | 10674 | 13         | 2324 | -61        | 236 | 2          | 8114 | 72         |
| Apr 21 | 10683 | 9          | 2233 | -91        | 237 | 1          | 8213 | 99         |
| Apr 22 | 10694 | 11         | 2179 | -54        | 238 | 1          | 8277 | 64         |
| Apr 23 | 10702 | 8          | 2051 | -128       | 240 | 2          | 8411 | 134        |
| Apr 24 | 10708 | 6          | 1967 | -84        | 240 | 0          | 8501 | 90         |
| Apr 25 | 10718 | 10         | 1843 | -124       | 240 | 0          | 8635 | 134        |
| Apr 26 | 10728 | 10         | 1769 | -74        | 242 | 2          | 8717 | 82         |

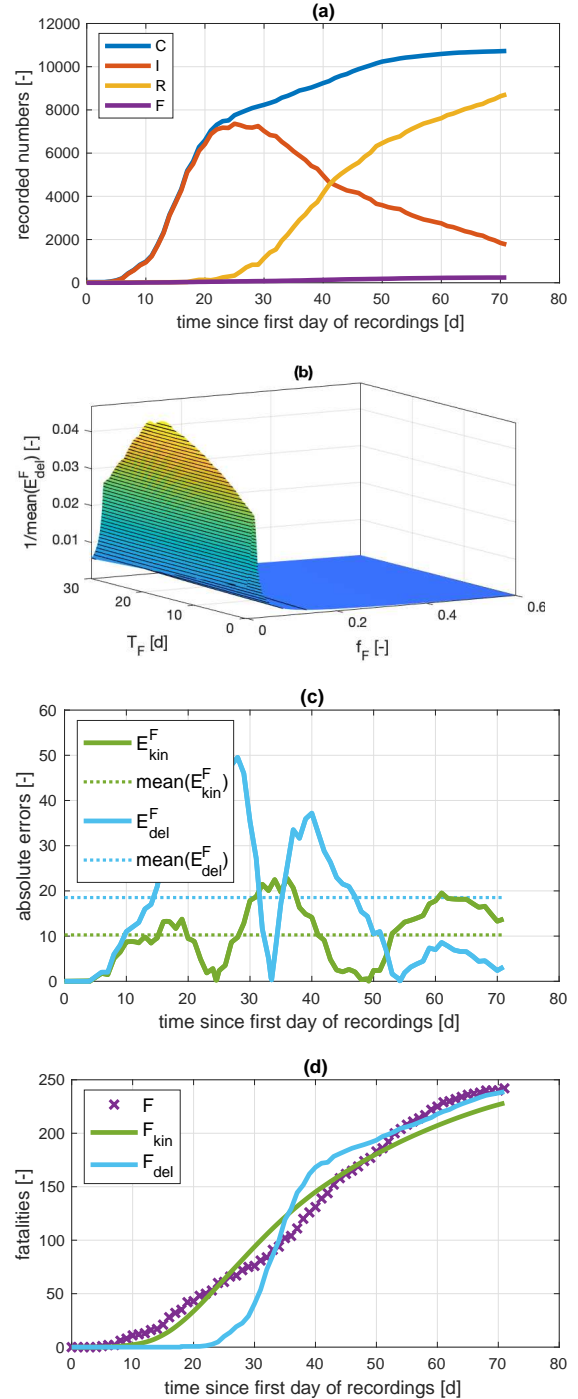

Figure 50: (a) Recorded data, (b) results of optimization based on infection-to-death delay rule, (c) absolute errors based on optimized parameter estimates, and (d) comparison between model-predicted fatalities based on optimized parameter estimates and recorded fatalities for South Korea

Table 51: Data recorded in Spain

| Date   | $C$    | $\Delta C$ | $I$    | $\Delta I$ | $F$   | $\Delta F$ | $R$    | $\Delta R$ |
|--------|--------|------------|--------|------------|-------|------------|--------|------------|
| Feb 15 | 2      | 2          | 0      | 0          | 0     | 0          | 2      | 2          |
| Feb 16 | 2      | 0          | 0      | 0          | 0     | 0          | 2      | 0          |
| Feb 17 | 2      | 0          | 0      | 0          | 0     | 0          | 2      | 0          |
| Feb 18 | 2      | 0          | 0      | 0          | 0     | 0          | 2      | 0          |
| Feb 19 | 2      | 0          | 0      | 0          | 0     | 0          | 2      | 0          |
| Feb 20 | 2      | 0          | 0      | 0          | 0     | 0          | 2      | 0          |
| Feb 21 | 2      | 0          | 0      | 0          | 0     | 0          | 2      | 0          |
| Feb 22 | 2      | 0          | 0      | 0          | 0     | 0          | 2      | 0          |
| Feb 23 | 2      | 0          | 0      | 0          | 0     | 0          | 2      | 0          |
| Feb 24 | 3      | 1          | 1      | 1          | 0     | 0          | 2      | 0          |
| Feb 25 | 9      | 6          | 7      | 6          | 0     | 0          | 2      | 0          |
| Feb 26 | 13     | 4          | 11     | 4          | 0     | 0          | 2      | 0          |
| Feb 27 | 25     | 12         | 23     | 12         | 0     | 0          | 2      | 0          |
| Feb 28 | 33     | 8          | 31     | 8          | 0     | 0          | 2      | 0          |
| Feb 29 | 58     | 25         | 56     | 25         | 0     | 0          | 2      | 0          |
| Mar 1  | 84     | 26         | 82     | 26         | 0     | 0          | 2      | 0          |
| Mar 2  | 120    | 36         | 118    | 36         | 0     | 0          | 2      | 0          |
| Mar 3  | 165    | 45         | 162    | 44         | 1     | 1          | 2      | 0          |
| Mar 4  | 228    | 63         | 224    | 62         | 2     | 1          | 2      | 0          |
| Mar 5  | 282    | 54         | 276    | 52         | 3     | 1          | 3      | 1          |
| Mar 6  | 401    | 119        | 387    | 111        | 8     | 5          | 6      | 3          |
| Mar 7  | 525    | 124        | 485    | 98         | 10    | 2          | 30     | 24         |
| Mar 8  | 674    | 149        | 625    | 140        | 17    | 7          | 32     | 2          |
| Mar 9  | 1231   | 557        | 1169   | 544        | 30    | 13         | 32     | 0          |
| Mar 10 | 1695   | 464        | 1524   | 355        | 36    | 6          | 135    | 103        |
| Mar 11 | 2277   | 582        | 2039   | 515        | 55    | 19         | 183    | 48         |
| Mar 12 | 3146   | 869        | 2871   | 832        | 86    | 31         | 189    | 6          |
| Mar 13 | 5232   | 2086       | 4906   | 2035       | 133   | 47         | 193    | 4          |
| Mar 14 | 6391   | 1159       | 5678   | 772        | 196   | 63         | 517    | 324        |
| Mar 15 | 7988   | 1597       | 7177   | 1499       | 294   | 98         | 517    | 0          |
| Mar 16 | 9942   | 1954       | 9070   | 1893       | 342   | 48         | 530    | 13         |
| Mar 17 | 11826  | 1884       | 10265  | 1195       | 533   | 191        | 1028   | 498        |
| Mar 18 | 14769  | 2943       | 13050  | 2785       | 638   | 105        | 1081   | 53         |
| Mar 19 | 18077  | 3308       | 16139  | 3089       | 831   | 193        | 1107   | 26         |
| Mar 20 | 21571  | 3494       | 18890  | 2751       | 1093  | 262        | 1588   | 481        |
| Mar 21 | 25496  | 3925       | 21990  | 3100       | 1381  | 288        | 2125   | 537        |
| Mar 22 | 28768  | 3272       | 24421  | 2431       | 1772  | 391        | 2575   | 450        |
| Mar 23 | 35136  | 6368       | 29470  | 5049       | 2311  | 539        | 3355   | 780        |
| Mar 24 | 42058  | 6922       | 35273  | 5803       | 2991  | 680        | 3794   | 439        |
| Mar 25 | 49515  | 7457       | 40501  | 5228       | 3647  | 656        | 5367   | 1573       |
| Mar 26 | 57786  | 8271       | 46406  | 5905       | 4365  | 718        | 7015   | 1648       |
| Mar 27 | 65719  | 7933       | 51224  | 4818       | 5138  | 773        | 9357   | 2342       |
| Mar 28 | 73235  | 7516       | 54968  | 3744       | 5982  | 844        | 12285  | 2928       |
| Mar 29 | 80110  | 6875       | 58598  | 3630       | 6803  | 821        | 14709  | 2424       |
| Mar 30 | 87956  | 7846       | 63460  | 4862       | 7716  | 913        | 16780  | 2071       |
| Mar 31 | 95923  | 7967       | 68200  | 4740       | 8464  | 748        | 19259  | 2479       |
| Apr 1  | 104118 | 8195       | 72084  | 3884       | 9387  | 923        | 22647  | 3388       |
| Apr 2  | 112065 | 7947       | 74974  | 2890       | 10348 | 961        | 26743  | 4096       |
| Apr 3  | 119199 | 7134       | 77488  | 2514       | 11198 | 850        | 30513  | 3770       |
| Apr 4  | 126168 | 6969       | 80002  | 2514       | 11947 | 749        | 34219  | 3706       |
| Apr 5  | 131646 | 5478       | 80925  | 923        | 12641 | 694        | 38080  | 3861       |
| Apr 6  | 136675 | 5029       | 82897  | 1972       | 13341 | 700        | 40437  | 2357       |
| Apr 7  | 141942 | 5267       | 84689  | 1792       | 14045 | 704        | 43208  | 2771       |
| Apr 8  | 148220 | 6278       | 85407  | 718        | 14792 | 747        | 48021  | 4813       |
| Apr 9  | 153222 | 5002       | 85610  | 203        | 15447 | 655        | 52165  | 4144       |
| Apr 10 | 158273 | 5051       | 86524  | 914        | 16081 | 634        | 55668  | 3503       |
| Apr 11 | 163027 | 4754       | 87312  | 788        | 16606 | 525        | 59109  | 3441       |
| Apr 12 | 166831 | 3804       | 87231  | -81        | 17209 | 603        | 62391  | 3282       |
| Apr 13 | 170099 | 3268       | 87616  | 385        | 17756 | 547        | 64727  | 2336       |
| Apr 14 | 174060 | 3961       | 88301  | 685        | 18255 | 499        | 67504  | 2777       |
| Apr 15 | 180659 | 6599       | 90994  | 2693       | 18812 | 557        | 70853  | 3349       |
| Apr 16 | 184948 | 4289       | 91021  | 27         | 19130 | 318        | 74797  | 3944       |
| Apr 17 | 190839 | 5891       | 96564  | 5543       | 19478 | 348        | 74797  | 0          |
| Apr 18 | 194416 | 3577       | 99576  | 3012       | 20043 | 565        | 74797  | 0          |
| Apr 19 | 198674 | 4258       | 100864 | 1288       | 20453 | 410        | 77357  | 2560       |
| Apr 20 | 200210 | 1536       | 98771  | -2093      | 20852 | 399        | 80587  | 3230       |
| Apr 21 | 204178 | 3968       | 100382 | 1611       | 21282 | 430        | 82514  | 1927       |
| Apr 22 | 208389 | 4211       | 100757 | 375        | 21717 | 435        | 85915  | 3401       |
| Apr 23 | 213024 | 4635       | 101617 | 860        | 22157 | 440        | 89250  | 3335       |
| Apr 24 | 219764 | 6740       | 104885 | 3268       | 22524 | 367        | 92355  | 3105       |
| Apr 25 | 223759 | 3995       | 105149 | 264        | 22902 | 378        | 95708  | 3353       |
| Apr 26 | 226629 | 2870       | 85712  | -19437     | 23190 | 288        | 117727 | 22019      |

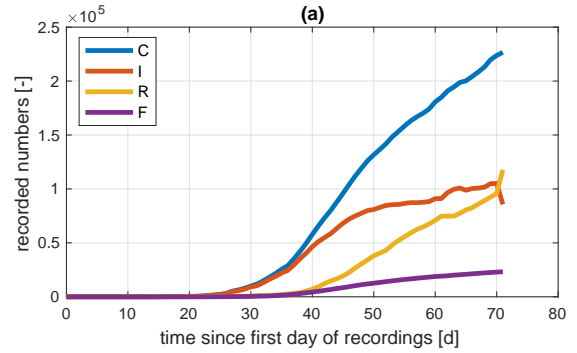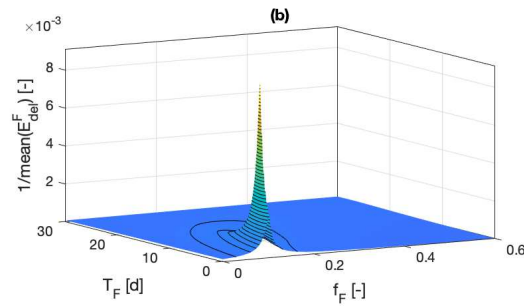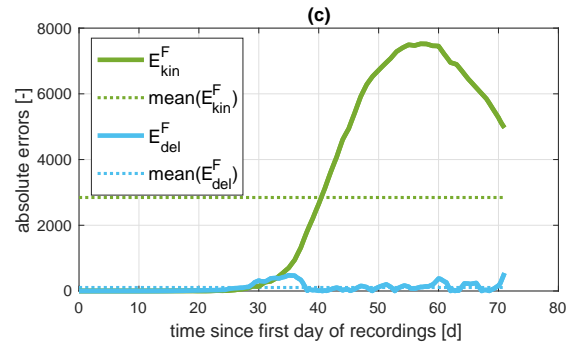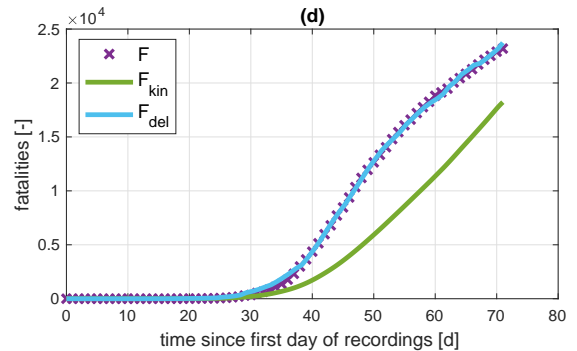

Figure 51: (a) Recorded data, (b) results of optimization based on infection-to-death delay rule, (c) absolute errors based on optimized parameter estimates, and (d) comparison between model-predicted fatalities based on optimized parameter estimates and recorded fatalities for Spain

Table 52: Data recorded in Sweden

| Date   | $C$   | $\Delta C$ | $I$   | $\Delta I$ | $F$  | $\Delta F$ | $R$  | $\Delta R$ |
|--------|-------|------------|-------|------------|------|------------|------|------------|
| Feb 15 | 1     | 1          | 1     | 1          | 0    | 0          | 0    | 0          |
| Feb 16 | 1     | 0          | 1     | 0          | 0    | 0          | 0    | 0          |
| Feb 17 | 1     | 0          | 1     | 0          | 0    | 0          | 0    | 0          |
| Feb 18 | 1     | 0          | 1     | 0          | 0    | 0          | 0    | 0          |
| Feb 19 | 1     | 0          | 1     | 0          | 0    | 0          | 0    | 0          |
| Feb 20 | 1     | 0          | 1     | 0          | 0    | 0          | 0    | 0          |
| Feb 21 | 1     | 0          | 1     | 0          | 0    | 0          | 0    | 0          |
| Feb 22 | 1     | 0          | 1     | 0          | 0    | 0          | 0    | 0          |
| Feb 23 | 1     | 0          | 1     | 0          | 0    | 0          | 0    | 0          |
| Feb 24 | 1     | 0          | 1     | 0          | 0    | 0          | 0    | 0          |
| Feb 25 | 1     | 0          | 1     | 0          | 0    | 0          | 0    | 0          |
| Feb 26 | 2     | 1          | 2     | 1          | 0    | 0          | 0    | 0          |
| Feb 27 | 7     | 5          | 7     | 5          | 0    | 0          | 0    | 0          |
| Feb 28 | 11    | 4          | 11    | 4          | 0    | 0          | 0    | 0          |
| Feb 29 | 13    | 2          | 13    | 2          | 0    | 0          | 0    | 0          |
| Mar 1  | 14    | 1          | 14    | 1          | 0    | 0          | 0    | 0          |
| Mar 2  | 15    | 1          | 15    | 1          | 0    | 0          | 0    | 0          |
| Mar 3  | 30    | 15         | 29    | 14         | 0    | 0          | 1    | 1          |
| Mar 4  | 52    | 22         | 51    | 22         | 0    | 0          | 1    | 0          |
| Mar 5  | 94    | 42         | 93    | 42         | 0    | 0          | 1    | 0          |
| Mar 6  | 137   | 43         | 136   | 43         | 0    | 0          | 1    | 0          |
| Mar 7  | 161   | 24         | 160   | 24         | 0    | 0          | 1    | 0          |
| Mar 8  | 203   | 42         | 202   | 42         | 0    | 0          | 1    | 0          |
| Mar 9  | 260   | 57         | 259   | 57         | 0    | 0          | 1    | 0          |
| Mar 10 | 355   | 95         | 354   | 95         | 0    | 0          | 1    | 0          |
| Mar 11 | 500   | 145        | 498   | 144        | 1    | 1          | 1    | 0          |
| Mar 12 | 687   | 187        | 685   | 187        | 1    | 0          | 1    | 0          |
| Mar 13 | 814   | 127        | 812   | 127        | 1    | 0          | 1    | 0          |
| Mar 14 | 961   | 147        | 958   | 146        | 2    | 1          | 1    | 0          |
| Mar 15 | 1040  | 79         | 1036  | 78         | 3    | 1          | 1    | 0          |
| Mar 16 | 1121  | 81         | 1113  | 77         | 7    | 4          | 1    | 0          |
| Mar 17 | 1196  | 75         | 1187  | 74         | 8    | 1          | 1    | 0          |
| Mar 18 | 1301  | 105        | 1276  | 89         | 10   | 2          | 15   | 14         |
| Mar 19 | 1439  | 138        | 1412  | 136        | 11   | 1          | 16   | 1          |
| Mar 20 | 1639  | 200        | 1607  | 195        | 16   | 5          | 16   | 0          |
| Mar 21 | 1770  | 131        | 1734  | 127        | 20   | 4          | 16   | 0          |
| Mar 22 | 1934  | 164        | 1897  | 163        | 21   | 1          | 16   | 0          |
| Mar 23 | 2046  | 112        | 2003  | 106        | 27   | 6          | 16   | 0          |
| Mar 24 | 2299  | 253        | 2243  | 240        | 40   | 13         | 16   | 0          |
| Mar 25 | 2526  | 227        | 2448  | 205        | 62   | 22         | 16   | 0          |
| Mar 26 | 2840  | 314        | 2747  | 299        | 77   | 15         | 16   | 0          |
| Mar 27 | 3069  | 229        | 2948  | 201        | 105  | 28         | 16   | 0          |
| Mar 28 | 3447  | 378        | 3326  | 378        | 105  | 0          | 16   | 0          |
| Mar 29 | 3700  | 253        | 3574  | 248        | 110  | 5          | 16   | 0          |
| Mar 30 | 4028  | 328        | 3866  | 292        | 146  | 36         | 16   | 0          |
| Mar 31 | 4435  | 407        | 4239  | 373        | 180  | 34         | 16   | 0          |
| Apr 1  | 4947  | 512        | 4605  | 366        | 239  | 59         | 103  | 87         |
| Apr 2  | 5568  | 621        | 5157  | 552        | 308  | 69         | 103  | 0          |
| Apr 3  | 6131  | 563        | 5568  | 411        | 358  | 50         | 205  | 102        |
| Apr 4  | 6443  | 312        | 5865  | 297        | 373  | 15         | 205  | 0          |
| Apr 5  | 6830  | 387        | 6224  | 359        | 401  | 28         | 205  | 0          |
| Apr 6  | 7206  | 376        | 6524  | 300        | 477  | 76         | 205  | 0          |
| Apr 7  | 7693  | 487        | 6897  | 373        | 591  | 114        | 205  | 0          |
| Apr 8  | 8419  | 726        | 7527  | 630        | 687  | 96         | 205  | 0          |
| Apr 9  | 9141  | 722        | 8143  | 616        | 793  | 106        | 205  | 0          |
| Apr 10 | 9685  | 544        | 8434  | 291        | 870  | 77         | 381  | 176        |
| Apr 11 | 10151 | 466        | 8883  | 449        | 887  | 17         | 381  | 0          |
| Apr 12 | 10483 | 332        | 9203  | 320        | 899  | 12         | 381  | 0          |
| Apr 13 | 10948 | 465        | 9648  | 445        | 919  | 20         | 381  | 0          |
| Apr 14 | 11445 | 497        | 10031 | 383        | 1033 | 114        | 381  | 0          |
| Apr 15 | 11927 | 482        | 10343 | 312        | 1203 | 170        | 381  | 0          |
| Apr 16 | 12540 | 613        | 10657 | 314        | 1333 | 130        | 550  | 169        |
| Apr 17 | 13216 | 676        | 11266 | 609        | 1400 | 67         | 550  | 0          |
| Apr 18 | 13822 | 606        | 11761 | 495        | 1511 | 111        | 550  | 0          |
| Apr 19 | 14385 | 563        | 12295 | 534        | 1540 | 29         | 550  | 0          |
| Apr 20 | 14777 | 392        | 12647 | 352        | 1580 | 40         | 550  | 0          |
| Apr 21 | 15322 | 545        | 13007 | 360        | 1765 | 185        | 550  | 0          |
| Apr 22 | 16004 | 682        | 13517 | 510        | 1937 | 172        | 550  | 0          |
| Apr 23 | 16755 | 751        | 14184 | 667        | 2021 | 84         | 550  | 0          |
| Apr 24 | 17567 | 812        | 14865 | 681        | 2152 | 131        | 550  | 0          |
| Apr 25 | 18177 | 610        | 14980 | 115        | 2192 | 40         | 1005 | 455        |
| Apr 26 | 18640 | 463        | 15441 | 461        | 2194 | 2          | 1005 | 0          |

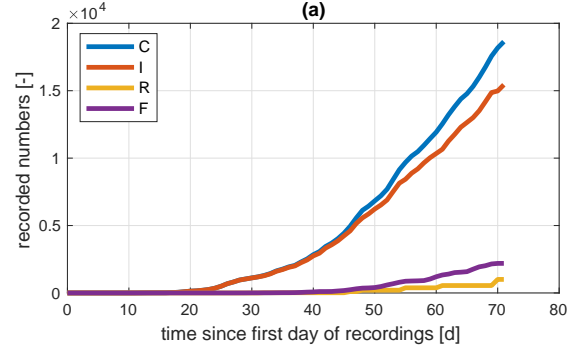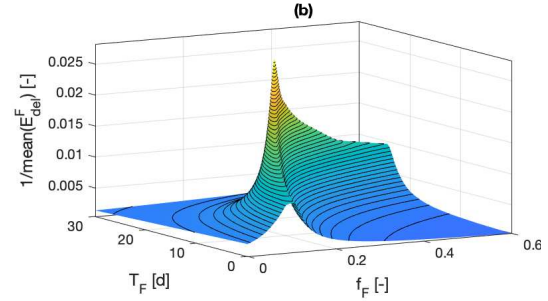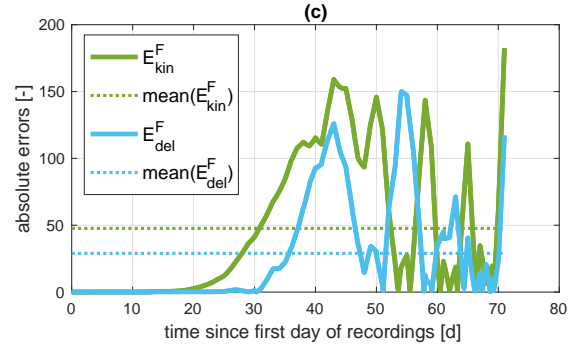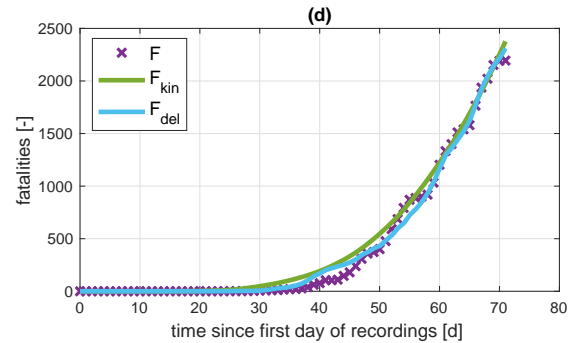

Figure 52: (a) Recorded data, (b) results of optimization based on infection-to-death delay rule, (c) absolute errors based on optimized parameter estimates, and (d) comparison between model-predicted fatalities based on optimized parameter estimates and recorded fatalities for Sweden

Table 53: Data recorded in Switzerland

| Date   | $C$   | $\Delta C$ | $I$   | $\Delta I$ | $F$  | $\Delta F$ | $R$   | $\Delta R$ |
|--------|-------|------------|-------|------------|------|------------|-------|------------|
| Feb 25 | 1     | 1          | 1     | 1          | 0    | 0          | 0     | 0          |
| Feb 26 | 1     | 0          | 1     | 0          | 0    | 0          | 0     | 0          |
| Feb 27 | 8     | 7          | 8     | 7          | 0    | 0          | 0     | 0          |
| Feb 28 | 15    | 7          | 15    | 7          | 0    | 0          | 0     | 0          |
| Feb 29 | 19    | 4          | 19    | 4          | 0    | 0          | 0     | 0          |
| Mar 1  | 24    | 5          | 23    | 4          | 0    | 0          | 1     | 1          |
| Mar 2  | 30    | 6          | 29    | 6          | 0    | 0          | 1     | 0          |
| Mar 3  | 58    | 28         | 56    | 27         | 0    | 0          | 2     | 1          |
| Mar 4  | 93    | 35         | 90    | 34         | 0    | 0          | 3     | 1          |
| Mar 5  | 120   | 27         | 116   | 26         | 1    | 1          | 3     | 0          |
| Mar 6  | 214   | 94         | 210   | 94         | 1    | 0          | 3     | 0          |
| Mar 7  | 268   | 54         | 264   | 54         | 1    | 0          | 3     | 0          |
| Mar 8  | 332   | 64         | 327   | 63         | 2    | 1          | 3     | 0          |
| Mar 9  | 374   | 42         | 369   | 42         | 2    | 0          | 3     | 0          |
| Mar 10 | 497   | 123        | 491   | 122        | 3    | 1          | 3     | 0          |
| Mar 11 | 652   | 155        | 644   | 153        | 4    | 1          | 4     | 1          |
| Mar 12 | 868   | 216        | 857   | 213        | 7    | 3          | 4     | 0          |
| Mar 13 | 1139  | 271        | 1124  | 267        | 11   | 4          | 4     | 0          |
| Mar 14 | 1375  | 236        | 1358  | 234        | 13   | 2          | 4     | 0          |
| Mar 15 | 2217  | 842        | 2199  | 841        | 14   | 1          | 4     | 0          |
| Mar 16 | 2353  | 136        | 2330  | 131        | 19   | 5          | 4     | 0          |
| Mar 17 | 2742  | 389        | 2700  | 370        | 27   | 8          | 15    | 11         |
| Mar 18 | 3115  | 373        | 3067  | 367        | 33   | 6          | 15    | 0          |
| Mar 19 | 4222  | 1107       | 4164  | 1097       | 43   | 10         | 15    | 0          |
| Mar 20 | 5615  | 1393       | 5544  | 1380       | 56   | 13         | 15    | 0          |
| Mar 21 | 6863  | 1248       | 6652  | 1108       | 80   | 24         | 131   | 116        |
| Mar 22 | 7474  | 611        | 7245  | 593        | 98   | 18         | 131   | 0          |
| Mar 23 | 8795  | 1321       | 8544  | 1299       | 120  | 22         | 131   | 0          |
| Mar 24 | 9877  | 1082       | 9624  | 1080       | 122  | 2          | 131   | 0          |
| Mar 25 | 10897 | 1020       | 10613 | 989        | 153  | 31         | 131   | 0          |
| Mar 26 | 11811 | 914        | 11488 | 875        | 192  | 39         | 131   | 0          |
| Mar 27 | 12928 | 1117       | 11167 | -321       | 231  | 39         | 1530  | 1399       |
| Mar 28 | 14076 | 1148       | 12282 | 1115       | 264  | 33         | 1530  | 0          |
| Mar 29 | 14829 | 753        | 12934 | 652        | 300  | 36         | 1595  | 65         |
| Mar 30 | 15922 | 1093       | 13740 | 806        | 359  | 59         | 1823  | 228        |
| Mar 31 | 16605 | 683        | 14349 | 609        | 433  | 74         | 1823  | 0          |
| Apr 1  | 17768 | 1163       | 14313 | -36        | 488  | 55         | 2967  | 1144       |
| Apr 2  | 18827 | 1059       | 14278 | -35        | 536  | 48         | 4013  | 1046       |
| Apr 3  | 19606 | 779        | 14169 | -109       | 591  | 55         | 4846  | 833        |
| Apr 4  | 20505 | 899        | 13424 | -745       | 666  | 75         | 6415  | 1569       |
| Apr 5  | 21100 | 595        | 13970 | 546        | 715  | 49         | 6415  | 0          |
| Apr 6  | 21657 | 557        | 12836 | -1134      | 765  | 50         | 8056  | 1641       |
| Apr 7  | 22253 | 596        | 12728 | -108       | 821  | 56         | 8704  | 648        |
| Apr 8  | 23280 | 1027       | 12585 | -143       | 895  | 74         | 9800  | 1096       |
| Apr 9  | 24051 | 771        | 12503 | -82        | 948  | 53         | 10600 | 800        |
| Apr 10 | 24551 | 500        | 12449 | -54        | 1002 | 54         | 11100 | 500        |
| Apr 11 | 25107 | 556        | 11971 | -478       | 1036 | 34         | 12100 | 1000       |
| Apr 12 | 25415 | 308        | 11609 | -362       | 1106 | 70         | 12700 | 600        |
| Apr 13 | 25688 | 273        | 10850 | -759       | 1138 | 32         | 13700 | 1000       |
| Apr 14 | 25936 | 248        | 11062 | 212        | 1174 | 36         | 13700 | 0          |
| Apr 15 | 26336 | 400        | 9697  | -1365      | 1239 | 65         | 15400 | 1700       |
| Apr 16 | 26732 | 396        | 9551  | -146       | 1281 | 42         | 15900 | 500        |
| Apr 17 | 27078 | 346        | 9351  | -200       | 1327 | 46         | 16400 | 500        |
| Apr 18 | 27404 | 326        | 8936  | -415       | 1368 | 41         | 17100 | 700        |
| Apr 19 | 27740 | 336        | 8547  | -389       | 1393 | 25         | 17800 | 700        |
| Apr 20 | 27944 | 204        | 7915  | -632       | 1429 | 36         | 18600 | 800        |
| Apr 21 | 28063 | 119        | 7185  | -730       | 1478 | 49         | 19400 | 800        |
| Apr 22 | 28268 | 205        | 6859  | -326       | 1509 | 31         | 19900 | 500        |
| Apr 23 | 28496 | 228        | 6347  | -512       | 1549 | 40         | 20600 | 700        |
| Apr 24 | 28677 | 181        | 6088  | -259       | 1589 | 40         | 21000 | 400        |
| Apr 25 | 28894 | 217        | 5995  | -93        | 1599 | 10         | 21300 | 300        |
| Apr 26 | 29061 | 167        | 5651  | -344       | 1610 | 11         | 21800 | 500        |

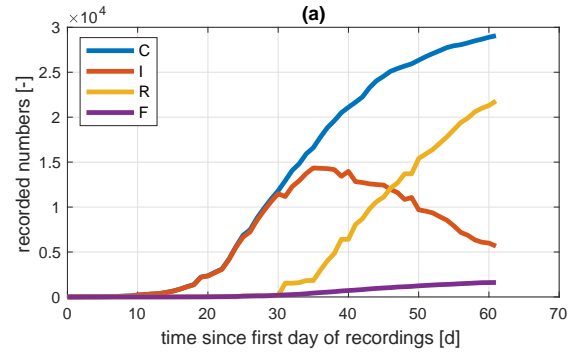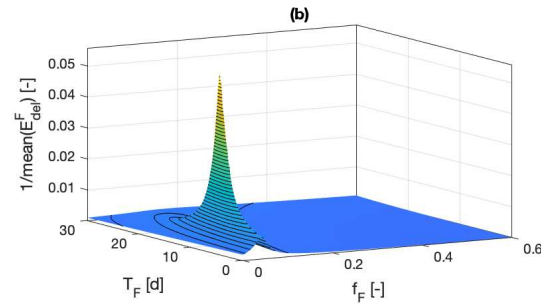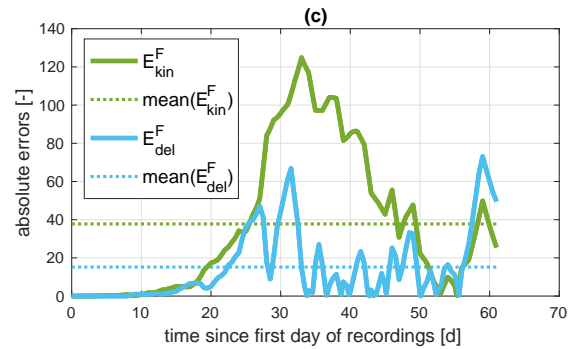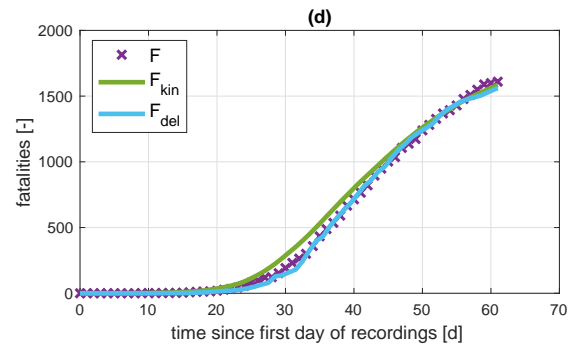

Figure 53: (a) Recorded data, (b) results of optimization based on infection-to-death delay rule, (c) absolute errors based on optimized parameter estimates, and (d) comparison between model-predicted fatalities based on optimized parameter estimates and recorded fatalities for Switzerland

Table 54: Data recorded in Turkey

| Date   | $C$    | $\Delta C$ | $I$   | $\Delta I$ | $F$  | $\Delta F$ | $R$   | $\Delta R$ |
|--------|--------|------------|-------|------------|------|------------|-------|------------|
| Mar 10 | 1      | 1          | 1     | 1          | 0    | 0          | 0     | 0          |
| Mar 11 | 1      | 0          | 1     | 0          | 0    | 0          | 0     | 0          |
| Mar 12 | 1      | 0          | 1     | 0          | 0    | 0          | 0     | 0          |
| Mar 13 | 5      | 4          | 5     | 4          | 0    | 0          | 0     | 0          |
| Mar 14 | 6      | 1          | 6     | 1          | 0    | 0          | 0     | 0          |
| Mar 15 | 18     | 12         | 18    | 12         | 0    | 0          | 0     | 0          |
| Mar 16 | 47     | 29         | 47    | 29         | 0    | 0          | 0     | 0          |
| Mar 17 | 98     | 51         | 97    | 50         | 1    | 1          | 0     | 0          |
| Mar 18 | 191    | 93         | 189   | 92         | 2    | 1          | 0     | 0          |
| Mar 19 | 359    | 168        | 355   | 166        | 4    | 2          | 0     | 0          |
| Mar 20 | 670    | 311        | 661   | 306        | 9    | 5          | 0     | 0          |
| Mar 21 | 947    | 277        | 926   | 265        | 21   | 12         | 0     | 0          |
| Mar 22 | 1236   | 289        | 1206  | 280        | 30   | 9          | 0     | 0          |
| Mar 23 | 1529   | 293        | 1492  | 286        | 37   | 7          | 0     | 0          |
| Mar 24 | 1872   | 343        | 1828  | 336        | 44   | 7          | 0     | 0          |
| Mar 25 | 2433   | 561        | 2348  | 520        | 59   | 15         | 26    | 26         |
| Mar 26 | 3629   | 1196       | 3528  | 1180       | 75   | 16         | 26    | 0          |
| Mar 27 | 5698   | 2069       | 5564  | 2036       | 92   | 17         | 42    | 16         |
| Mar 28 | 7402   | 1704       | 7224  | 1660       | 108  | 16         | 70    | 28         |
| Mar 29 | 9217   | 1815       | 8981  | 1757       | 131  | 23         | 105   | 35         |
| Mar 30 | 10827  | 1610       | 10497 | 1516       | 168  | 37         | 162   | 57         |
| Mar 31 | 13531  | 2704       | 13074 | 2577       | 214  | 46         | 243   | 81         |
| Apr 1  | 15679  | 2148       | 15069 | 1995       | 277  | 63         | 333   | 90         |
| Apr 2  | 18135  | 2456       | 17364 | 2295       | 356  | 79         | 415   | 82         |
| Apr 3  | 20921  | 2786       | 20012 | 2648       | 425  | 69         | 484   | 69         |
| Apr 4  | 23934  | 3013       | 22647 | 2635       | 501  | 76         | 786   | 302        |
| Apr 5  | 27069  | 3135       | 25453 | 2806       | 574  | 73         | 1042  | 256        |
| Apr 6  | 30217  | 3148       | 28242 | 2789       | 649  | 75         | 1326  | 284        |
| Apr 7  | 34109  | 3892       | 31802 | 3560       | 725  | 76         | 1582  | 256        |
| Apr 8  | 38226  | 4117       | 35568 | 3766       | 812  | 87         | 1846  | 264        |
| Apr 9  | 42282  | 4056       | 39232 | 3664       | 908  | 96         | 2142  | 296        |
| Apr 10 | 47029  | 4747       | 43600 | 4368       | 1006 | 98         | 2423  | 281        |
| Apr 11 | 52167  | 5138       | 48101 | 4501       | 1101 | 95         | 2965  | 542        |
| Apr 12 | 56956  | 4789       | 52312 | 4211       | 1198 | 97         | 3446  | 481        |
| Apr 13 | 61049  | 4093       | 55796 | 3484       | 1296 | 98         | 3957  | 511        |
| Apr 14 | 65111  | 4062       | 58909 | 3113       | 1403 | 107        | 4799  | 842        |
| Apr 15 | 69392  | 4281       | 62200 | 3291       | 1518 | 115        | 5674  | 875        |
| Apr 16 | 74193  | 4801       | 65461 | 3261       | 1643 | 125        | 7089  | 1415       |
| Apr 17 | 78546  | 4353       | 68146 | 2685       | 1769 | 126        | 8631  | 1542       |
| Apr 18 | 82329  | 3783       | 69986 | 1840       | 1890 | 121        | 10453 | 1822       |
| Apr 19 | 86306  | 3977       | 72313 | 2327       | 2017 | 127        | 11976 | 1523       |
| Apr 20 | 90980  | 4674       | 75410 | 3097       | 2140 | 123        | 13430 | 1454       |
| Apr 21 | 95591  | 4611       | 78414 | 3004       | 2259 | 119        | 14918 | 1488       |
| Apr 22 | 98674  | 3083       | 79821 | 1407       | 2376 | 117        | 16477 | 1559       |
| Apr 23 | 101790 | 3116       | 80808 | 987        | 2491 | 115        | 18491 | 2014       |
| Apr 24 | 104912 | 3122       | 80575 | -233       | 2600 | 109        | 21737 | 3246       |
| Apr 25 | 107773 | 2861       | 79485 | -1090      | 2706 | 106        | 25582 | 3845       |
| Apr 26 | 110130 | 2357       | 78185 | -1300      | 2805 | 99         | 29140 | 3558       |

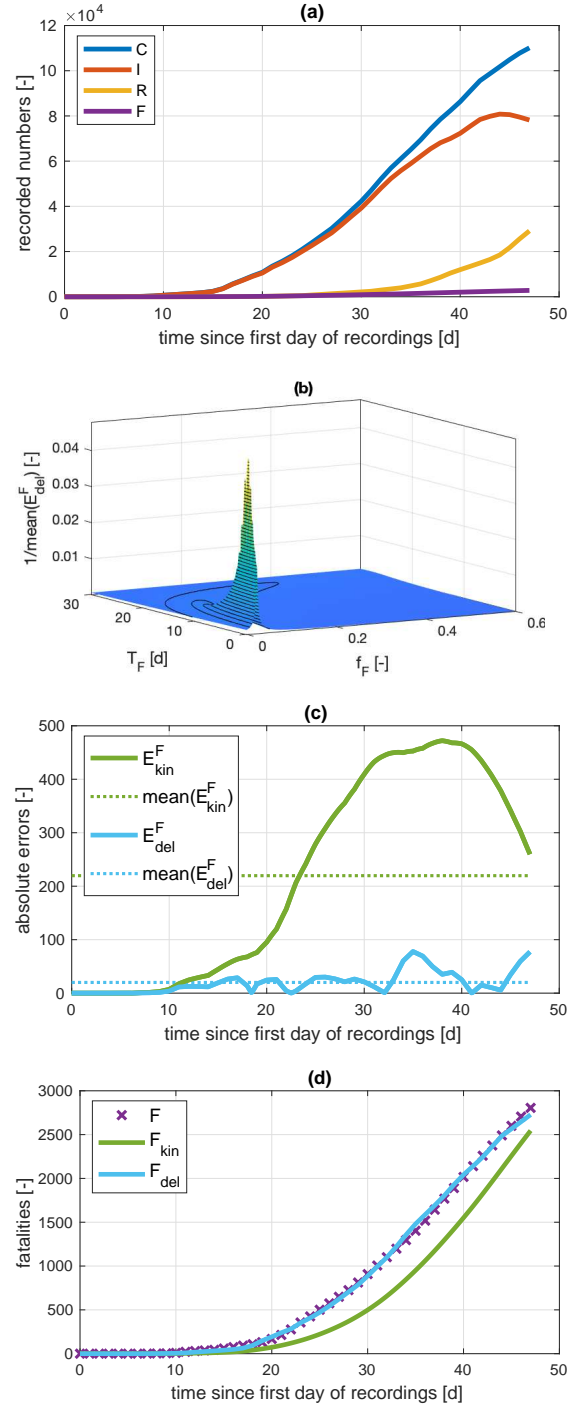

Figure 54: (a) Recorded data, (b) results of optimization based on infection-to-death delay rule, (c) absolute errors based on optimized parameter estimates, and (d) comparison between model-predicted fatalities based on optimized parameter estimates and recorded fatalities for Turkey

Table 55: Data recorded in Ukraine

| Date   | C    | $\Delta C$ | I    | $\Delta I$ | F   | $\Delta F$ | R   | $\Delta R$ |
|--------|------|------------|------|------------|-----|------------|-----|------------|
| Mar 3  | 1    | 1          | 1    | 1          | 0   | 0          | 0   | 0          |
| Mar 4  | 1    | 0          | 1    | 0          | 0   | 0          | 0   | 0          |
| Mar 5  | 1    | 0          | 1    | 0          | 0   | 0          | 0   | 0          |
| Mar 6  | 1    | 0          | 1    | 0          | 0   | 0          | 0   | 0          |
| Mar 7  | 1    | 0          | 1    | 0          | 0   | 0          | 0   | 0          |
| Mar 8  | 1    | 0          | 1    | 0          | 0   | 0          | 0   | 0          |
| Mar 9  | 1    | 0          | 1    | 0          | 0   | 0          | 0   | 0          |
| Mar 10 | 1    | 0          | 1    | 0          | 0   | 0          | 0   | 0          |
| Mar 11 | 1    | 0          | 1    | 0          | 0   | 0          | 0   | 0          |
| Mar 12 | 3    | 2          | 3    | 2          | 0   | 0          | 0   | 0          |
| Mar 13 | 3    | 0          | 2    | -1         | 1   | 1          | 0   | 0          |
| Mar 14 | 3    | 0          | 2    | 0          | 1   | 0          | 0   | 0          |
| Mar 15 | 3    | 0          | 2    | 0          | 1   | 0          | 0   | 0          |
| Mar 16 | 7    | 4          | 6    | 4          | 1   | 0          | 0   | 0          |
| Mar 17 | 14   | 7          | 12   | 6          | 2   | 1          | 0   | 0          |
| Mar 18 | 16   | 2          | 14   | 2          | 2   | 0          | 0   | 0          |
| Mar 19 | 26   | 10         | 23   | 9          | 3   | 1          | 0   | 0          |
| Mar 20 | 41   | 15         | 37   | 14         | 3   | 0          | 1   | 1          |
| Mar 21 | 47   | 6          | 43   | 6          | 3   | 0          | 1   | 0          |
| Mar 22 | 73   | 26         | 69   | 26         | 3   | 0          | 1   | 0          |
| Mar 23 | 73   | 0          | 69   | 0          | 3   | 0          | 1   | 0          |
| Mar 24 | 102  | 29         | 98   | 29         | 3   | 0          | 1   | 0          |
| Mar 25 | 145  | 43         | 139  | 41         | 5   | 2          | 1   | 0          |
| Mar 26 | 196  | 51         | 190  | 51         | 5   | 0          | 1   | 0          |
| Mar 27 | 310  | 114        | 300  | 110        | 5   | 0          | 5   | 4          |
| Mar 28 | 356  | 46         | 342  | 42         | 9   | 4          | 5   | 0          |
| Mar 29 | 475  | 119        | 459  | 117        | 10  | 1          | 6   | 1          |
| Mar 30 | 548  | 73         | 527  | 68         | 13  | 3          | 8   | 2          |
| Mar 31 | 645  | 97         | 618  | 91         | 17  | 4          | 10  | 2          |
| Apr 1  | 794  | 149        | 761  | 143        | 20  | 3          | 13  | 3          |
| Apr 2  | 897  | 103        | 856  | 95         | 22  | 2          | 19  | 6          |
| Apr 3  | 1072 | 175        | 1023 | 167        | 27  | 5          | 22  | 3          |
| Apr 4  | 1225 | 153        | 1168 | 145        | 32  | 5          | 25  | 3          |
| Apr 5  | 1308 | 83         | 1243 | 75         | 37  | 5          | 28  | 3          |
| Apr 6  | 1319 | 11         | 1253 | 10         | 38  | 1          | 28  | 0          |
| Apr 7  | 1462 | 143        | 1389 | 136        | 45  | 7          | 28  | 0          |
| Apr 8  | 1668 | 206        | 1581 | 192        | 52  | 7          | 35  | 7          |
| Apr 9  | 1892 | 224        | 1790 | 209        | 57  | 5          | 45  | 10         |
| Apr 10 | 2203 | 311        | 2073 | 283        | 69  | 12         | 61  | 16         |
| Apr 11 | 2511 | 308        | 2359 | 286        | 73  | 4          | 79  | 18         |
| Apr 12 | 2777 | 266        | 2605 | 246        | 83  | 10         | 89  | 10         |
| Apr 13 | 3102 | 325        | 2912 | 307        | 93  | 10         | 97  | 8          |
| Apr 14 | 3372 | 270        | 3155 | 243        | 98  | 5          | 119 | 22         |
| Apr 15 | 3764 | 392        | 3513 | 358        | 108 | 10         | 143 | 24         |
| Apr 16 | 4161 | 397        | 3859 | 346        | 116 | 8          | 186 | 43         |
| Apr 17 | 4662 | 501        | 4291 | 432        | 125 | 9          | 246 | 60         |
| Apr 18 | 5106 | 444        | 4698 | 407        | 133 | 8          | 275 | 29         |
| Apr 19 | 5449 | 343        | 4961 | 263        | 141 | 8          | 347 | 72         |
| Apr 20 | 5710 | 261        | 5200 | 239        | 151 | 10         | 359 | 12         |
| Apr 21 | 6125 | 415        | 5597 | 397        | 161 | 10         | 367 | 8          |
| Apr 22 | 6592 | 467        | 5994 | 397        | 174 | 13         | 424 | 57         |
| Apr 23 | 7170 | 578        | 6479 | 485        | 187 | 13         | 504 | 80         |
| Apr 24 | 7647 | 477        | 6853 | 374        | 193 | 6          | 601 | 97         |
| Apr 25 | 8125 | 478        | 7142 | 289        | 201 | 8          | 782 | 181        |
| Apr 26 | 8617 | 492        | 7568 | 426        | 209 | 8          | 840 | 58         |

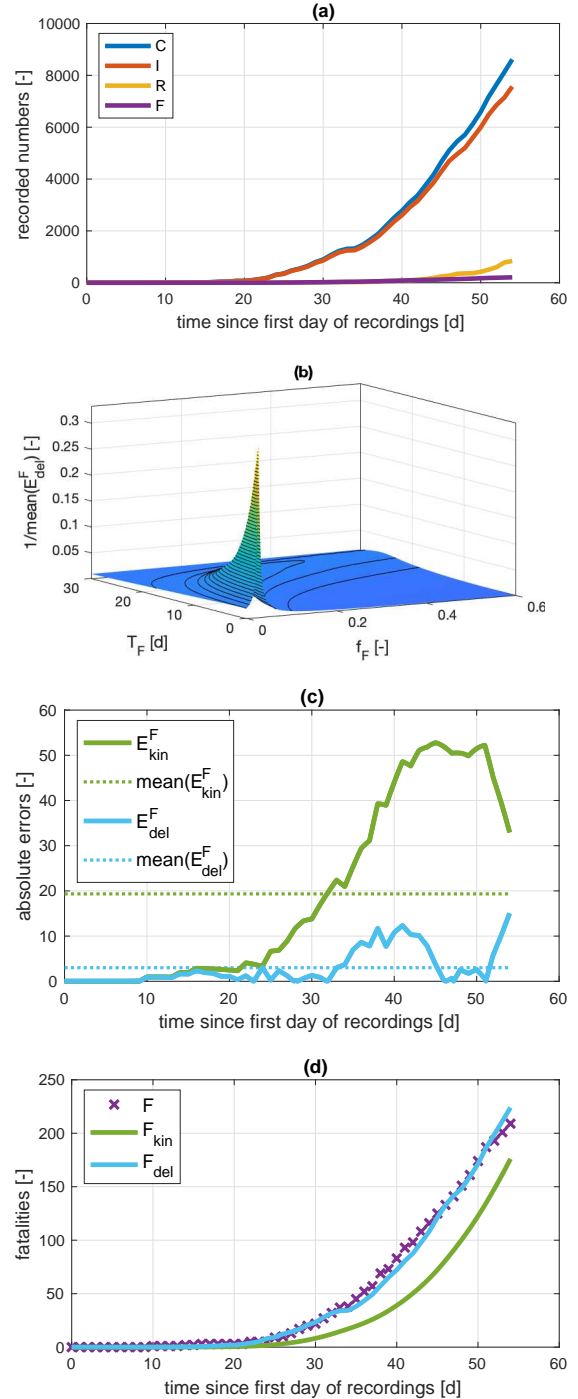

Figure 55: (a) Recorded data, (b) results of optimization based on infection-to-death delay rule, (c) absolute errors based on optimized parameter estimates, and (d) comparison between model-predicted fatalities based on optimized parameter estimates and recorded fatalities for Ukraine



Table 56: Data recorded in United Kingdom

| Date   | $C$    | $\Delta C$ | $I$    | $\Delta I$ | $F$   | $\Delta F$ | $R$ | $\Delta R$ |
|--------|--------|------------|--------|------------|-------|------------|-----|------------|
| Feb 15 | 9      | 9          | 1      | 1          | 0     | 0          | 8   | 8          |
| Feb 16 | 9      | 0          | 1      | 0          | 0     | 0          | 8   | 0          |
| Feb 17 | 9      | 0          | 1      | 0          | 0     | 0          | 8   | 0          |
| Feb 18 | 9      | 0          | 1      | 0          | 0     | 0          | 8   | 0          |
| Feb 19 | 9      | 0          | 1      | 0          | 0     | 0          | 8   | 0          |
| Feb 20 | 9      | 0          | 1      | 0          | 0     | 0          | 8   | 0          |
| Feb 21 | 9      | 0          | 1      | 0          | 0     | 0          | 8   | 0          |
| Feb 22 | 9      | 0          | 1      | 0          | 0     | 0          | 8   | 0          |
| Feb 23 | 13     | 4          | 5      | 4          | 0     | 0          | 8   | 0          |
| Feb 24 | 13     | 0          | 5      | 0          | 0     | 0          | 8   | 0          |
| Feb 25 | 13     | 0          | 5      | 0          | 0     | 0          | 8   | 0          |
| Feb 26 | 13     | 0          | 5      | 0          | 0     | 0          | 8   | 0          |
| Feb 27 | 16     | 3          | 8      | 3          | 0     | 0          | 8   | 0          |
| Feb 28 | 20     | 4          | 12     | 4          | 0     | 0          | 8   | 0          |
| Feb 29 | 23     | 3          | 15     | 3          | 0     | 0          | 8   | 0          |
| Mar 1  | 36     | 13         | 28     | 13         | 0     | 0          | 8   | 0          |
| Mar 2  | 39     | 3          | 31     | 3          | 0     | 0          | 8   | 0          |
| Mar 3  | 51     | 12         | 43     | 12         | 0     | 0          | 8   | 0          |
| Mar 4  | 87     | 36         | 79     | 36         | 0     | 0          | 8   | 0          |
| Mar 5  | 116    | 29         | 97     | 18         | 1     | 1          | 18  | 10         |
| Mar 6  | 164    | 48         | 144    | 47         | 2     | 1          | 18  | 0          |
| Mar 7  | 209    | 45         | 189    | 45         | 2     | 0          | 18  | 0          |
| Mar 8  | 278    | 69         | 257    | 68         | 3     | 1          | 18  | 0          |
| Mar 9  | 321    | 43         | 298    | 41         | 5     | 2          | 18  | 0          |
| Mar 10 | 383    | 62         | 359    | 61         | 6     | 1          | 18  | 0          |
| Mar 11 | 460    | 77         | 434    | 75         | 8     | 2          | 18  | 0          |
| Mar 12 | 590    | 130        | 562    | 128        | 10    | 2          | 18  | 0          |
| Mar 13 | 797    | 207        | 769    | 207        | 11    | 1          | 17  | -1         |
| Mar 14 | 1061   | 264        | 1101   | 332        | 21    | 10         | -61 | -78        |
| Mar 15 | 1391   | 330        | 1336   | 235        | 35    | 14         | 20  | 81         |
| Mar 16 | 1543   | 152        | 1436   | 100        | 55    | 20         | 52  | 32         |
| Mar 17 | 1950   | 407        | 1814   | 378        | 71    | 16         | 65  | 13         |
| Mar 18 | 2626   | 676        | 2457   | 643        | 104   | 33         | 65  | 0          |
| Mar 19 | 3269   | 643        | 3060   | 603        | 144   | 40         | 65  | 0          |
| Mar 20 | 3983   | 714        | 3741   | 681        | 177   | 33         | 65  | 0          |
| Mar 21 | 5018   | 1035       | 4692   | 951        | 233   | 56         | 93  | 28         |
| Mar 22 | 5683   | 665        | 5309   | 617        | 281   | 48         | 93  | 0          |
| Mar 23 | 6650   | 967        | 6180   | 871        | 335   | 54         | 135 | 42         |
| Mar 24 | 8077   | 1427       | 7520   | 1340       | 422   | 87         | 135 | 0          |
| Mar 25 | 9529   | 1452       | 8931   | 1411       | 463   | 41         | 135 | 0          |
| Mar 26 | 11658  | 2129       | 10945  | 2014       | 578   | 115        | 135 | 0          |
| Mar 27 | 14543  | 2885       | 13649  | 2704       | 759   | 181        | 135 | 0          |
| Mar 28 | 17089  | 2546       | 15935  | 2286       | 1019  | 260        | 135 | 0          |
| Mar 29 | 19522  | 2433       | 18159  | 2224       | 1228  | 209        | 135 | 0          |
| Mar 30 | 22141  | 2619       | 20598  | 2439       | 1408  | 180        | 135 | 0          |
| Mar 31 | 25150  | 3009       | 23226  | 2628       | 1789  | 381        | 135 | 0          |
| Apr 1  | 29474  | 4324       | 26987  | 3761       | 2352  | 563        | 135 | 0          |
| Apr 2  | 33718  | 4244       | 30662  | 3675       | 2921  | 569        | 135 | 0          |
| Apr 3  | 38168  | 4450       | 34428  | 3766       | 3605  | 684        | 135 | 0          |
| Apr 4  | 41903  | 3735       | 37455  | 3027       | 4313  | 708        | 135 | 0          |
| Apr 5  | 47806  | 5903       | 42737  | 5282       | 4934  | 621        | 135 | 0          |
| Apr 6  | 51608  | 3802       | 46100  | 3363       | 5373  | 439        | 135 | 0          |
| Apr 7  | 55242  | 3634       | 48948  | 2848       | 6159  | 786        | 135 | 0          |
| Apr 8  | 60733  | 5491       | 53501  | 4553       | 7097  | 938        | 135 | 0          |
| Apr 9  | 65077  | 4344       | 56964  | 3463       | 7978  | 881        | 135 | 0          |
| Apr 10 | 73758  | 8681       | 64456  | 7492       | 8958  | 980        | 344 | 209        |
| Apr 11 | 78991  | 5233       | 68772  | 4316       | 9875  | 917        | 344 | 0          |
| Apr 12 | 84279  | 5288       | 73323  | 4551       | 10612 | 737        | 344 | 0          |
| Apr 13 | 88621  | 4342       | 76948  | 3625       | 11329 | 717        | 344 | 0          |
| Apr 14 | 93873  | 5252       | 81422  | 4474       | 12107 | 778        | 344 | 0          |
| Apr 15 | 98476  | 4603       | 85264  | 3842       | 12868 | 761        | 344 | 0          |
| Apr 16 | 103093 | 4617       | 89020  | 3756       | 13729 | 861        | 344 | 0          |
| Apr 17 | 108692 | 5599       | 93772  | 4752       | 14576 | 847        | 344 | 0          |
| Apr 18 | 114217 | 5525       | 98409  | 4637       | 15464 | 888        | 344 | 0          |
| Apr 19 | 120067 | 5850       | 103663 | 5254       | 16060 | 596        | 344 | 0          |
| Apr 20 | 124743 | 4676       | 107890 | 4227       | 16509 | 449        | 344 | 0          |
| Apr 21 | 129044 | 4301       | 111363 | 3473       | 17337 | 828        | 344 | 0          |
| Apr 22 | 133495 | 4451       | 115051 | 3688       | 18100 | 763        | 344 | 0          |
| Apr 23 | 138078 | 4583       | 118996 | 3945       | 18738 | 638        | 344 | 0          |
| Apr 24 | 143464 | 5386       | 123614 | 4618       | 19506 | 768        | 344 | 0          |
| Apr 25 | 148377 | 4913       | 127714 | 4100       | 20319 | 813        | 344 | 0          |
| Apr 26 | 152840 | 4463       | 131764 | 4050       | 20732 | 413        | 344 | 0          |

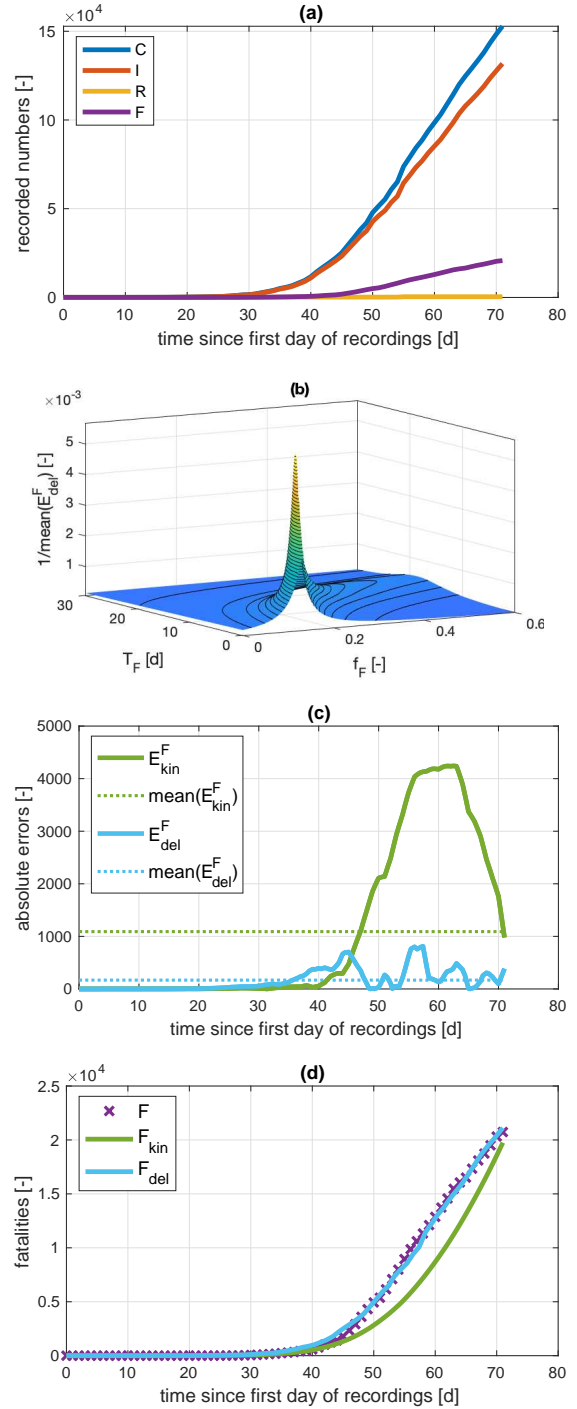

Figure 56: (a) Recorded data, (b) results of optimization based on infection-to-death delay rule, (c) absolute errors based on optimized parameter estimates, and (d) comparison between model-predicted fatalities based on optimized parameter estimates and recorded fatalities for United Kingdom



Table 57: Data recorded in United States

| Date   | $C$    | $\Delta C$ | $I$    | $\Delta I$ | $F$   | $\Delta F$ | $R$    | $\Delta R$ |
|--------|--------|------------|--------|------------|-------|------------|--------|------------|
| Feb 15 | 15     | 15         | 12     | 12         | 0     | 0          | 3      | 3          |
| Feb 16 | 15     | 0          | 12     | 0          | 0     | 0          | 3      | 0          |
| Feb 17 | 15     | 0          | 12     | 0          | 0     | 0          | 3      | 0          |
| Feb 18 | 15     | 0          | 12     | 0          | 0     | 0          | 3      | 0          |
| Feb 19 | 15     | 0          | 12     | 0          | 0     | 0          | 3      | 0          |
| Feb 20 | 15     | 0          | 10     | -2         | 0     | 0          | 5      | 2          |
| Feb 21 | 35     | 20         | 29     | 19         | 0     | 0          | 6      | 1          |
| Feb 22 | 35     | 0          | 29     | 0          | 0     | 0          | 6      | 0          |
| Feb 23 | 35     | 0          | 28     | -1         | 0     | 0          | 7      | 1          |
| Feb 24 | 53     | 18         | 48     | 20         | 0     | 0          | 5      | -2         |
| Feb 25 | 57     | 4          | 51     | 3          | 0     | 0          | 6      | 1          |
| Feb 26 | 60     | 3          | 54     | 3          | 0     | 0          | 6      | 0          |
| Feb 27 | 60     | 0          | 54     | 0          | 0     | 0          | 6      | 0          |
| Feb 28 | 63     | 3          | 57     | 3          | 0     | 0          | 6      | 0          |
| Feb 29 | 68     | 5          | 60     | 3          | 1     | 1          | 7      | 1          |
| Mar 1  | 75     | 7          | 65     | 5          | 1     | 0          | 9      | 2          |
| Mar 2  | 100    | 25         | 85     | 20         | 6     | 5          | 9      | 0          |
| Mar 3  | 124    | 24         | 106    | 21         | 9     | 3          | 9      | 0          |
| Mar 4  | 158    | 34         | 138    | 32         | 11    | 2          | 9      | 0          |
| Mar 5  | 221    | 63         | 200    | 62         | 12    | 1          | 9      | 0          |
| Mar 6  | 319    | 98         | 289    | 89         | 15    | 3          | 15     | 6          |
| Mar 7  | 435    | 116        | 401    | 112        | 19    | 4          | 15     | 0          |
| Mar 8  | 541    | 106        | 504    | 103        | 22    | 3          | 15     | 0          |
| Mar 9  | 704    | 163        | 663    | 159        | 26    | 4          | 15     | 0          |
| Mar 10 | 994    | 290        | 949    | 286        | 30    | 4          | 15     | 0          |
| Mar 11 | 1301   | 307        | 1248   | 299        | 38    | 8          | 15     | 0          |
| Mar 12 | 1630   | 329        | 1581   | 333        | 41    | 3          | 8      | -7         |
| Mar 13 | 2183   | 553        | 2126   | 545        | 48    | 7          | 9      | 1          |
| Mar 14 | 2771   | 588        | 2664   | 538        | 58    | 10         | 49     | 40         |
| Mar 15 | 3617   | 846        | 3484   | 820        | 73    | 15         | 60     | 11         |
| Mar 16 | 4604   | 987        | 4434   | 950        | 95    | 22         | 75     | 15         |
| Mar 17 | 6357   | 1753       | 6129   | 1695       | 121   | 26         | 107    | 32         |
| Mar 18 | 9317   | 2960       | 9032   | 2903       | 171   | 50         | 114    | 7          |
| Mar 19 | 13898  | 4581       | 13548  | 4516       | 239   | 68         | 111    | -3         |
| Mar 20 | 19551  | 5653       | 19092  | 5544       | 309   | 70         | 150    | 39         |
| Mar 21 | 24418  | 4867       | 23870  | 4778       | 374   | 65         | 174    | 24         |
| Mar 22 | 33840  | 9422       | 33150  | 9280       | 509   | 135        | 181    | 7          |
| Mar 23 | 44189  | 10349      | 43199  | 10049      | 689   | 180        | 301    | 120        |
| Mar 24 | 55398  | 11209      | 54044  | 10845      | 957   | 268        | 397    | 96         |
| Mar 25 | 68905  | 13507      | 67231  | 13187      | 1260  | 303        | 414    | 17         |
| Mar 26 | 86379  | 17474      | 82872  | 15641      | 1614  | 354        | 1893   | 1479       |
| Mar 27 | 105217 | 18838      | 100548 | 17676      | 2110  | 496        | 2559   | 666        |
| Mar 28 | 124788 | 19571      | 118766 | 18218      | 2754  | 644        | 3268   | 709        |
| Mar 29 | 144980 | 20192      | 137133 | 18367      | 3251  | 497        | 4596   | 1328       |
| Mar 30 | 168177 | 23197      | 158563 | 21430      | 4066  | 815        | 5548   | 952        |
| Mar 31 | 193353 | 25176      | 180900 | 22337      | 5151  | 1085       | 7302   | 1754       |
| Apr 1  | 220295 | 26942      | 204966 | 24066      | 6394  | 1243       | 8935   | 1633       |
| Apr 2  | 250708 | 30413      | 232646 | 27680      | 7576  | 1182       | 10486  | 1551       |
| Apr 3  | 283477 | 32769      | 262257 | 29611      | 8839  | 1263       | 12381  | 1895       |
| Apr 4  | 317994 | 34517      | 292687 | 30430      | 10384 | 1545       | 14923  | 2542       |
| Apr 5  | 343747 | 25753      | 313879 | 21192      | 11793 | 1409       | 18075  | 3152       |
| Apr 6  | 375348 | 31601      | 342203 | 28324      | 13298 | 1505       | 19847  | 1772       |
| Apr 7  | 409225 | 33877      | 371824 | 29621      | 15526 | 2228       | 21875  | 2028       |
| Apr 8  | 441569 | 32344      | 400987 | 29163      | 17691 | 2165       | 22891  | 1016       |
| Apr 9  | 475515 | 33946      | 429785 | 28798      | 19802 | 2111       | 25928  | 3037       |
| Apr 10 | 509604 | 34089      | 460252 | 30467      | 22038 | 2236       | 27314  | 1386       |
| Apr 11 | 539942 | 30338      | 485427 | 25175      | 24062 | 2024       | 30453  | 3139       |
| Apr 12 | 567708 | 27766      | 509285 | 23858      | 25789 | 1727       | 32634  | 2181       |
| Apr 13 | 594693 | 26985      | 530230 | 20945      | 27515 | 1726       | 36948  | 4314       |
| Apr 14 | 621953 | 27260      | 553052 | 22822      | 30081 | 2566       | 38820  | 1872       |
| Apr 15 | 652474 | 30521      | 571061 | 18009      | 32712 | 2631       | 48701  | 9881       |
| Apr 16 | 682454 | 29980      | 590041 | 18980      | 34905 | 2193       | 57508  | 8807       |
| Apr 17 | 714822 | 32368      | 616864 | 26823      | 37448 | 2543       | 60510  | 3002       |
| Apr 18 | 743901 | 29079      | 636301 | 19437      | 39331 | 1883       | 68269  | 7759       |
| Apr 19 | 770014 | 26113      | 657926 | 21625      | 40901 | 1570       | 71187  | 2918       |
| Apr 20 | 798145 | 28131      | 682903 | 24977      | 42853 | 1952       | 72389  | 1202       |
| Apr 21 | 824229 | 26084      | 695770 | 12867      | 45536 | 2683       | 82923  | 10534      |
| Apr 22 | 854385 | 30156      | 722441 | 26671      | 47894 | 2358       | 84050  | 1127       |
| Apr 23 | 886274 | 31889      | 750118 | 27677      | 50234 | 2340       | 85922  | 1872       |
| Apr 24 | 925232 | 38958      | 762607 | 12489      | 52193 | 1959       | 110432 | 24510      |
| Apr 25 | 960651 | 35419      | 788233 | 25626      | 54256 | 2063       | 118162 | 7730       |
| Apr 26 | 987160 | 26509      | 812966 | 24733      | 55413 | 1157       | 118781 | 619        |

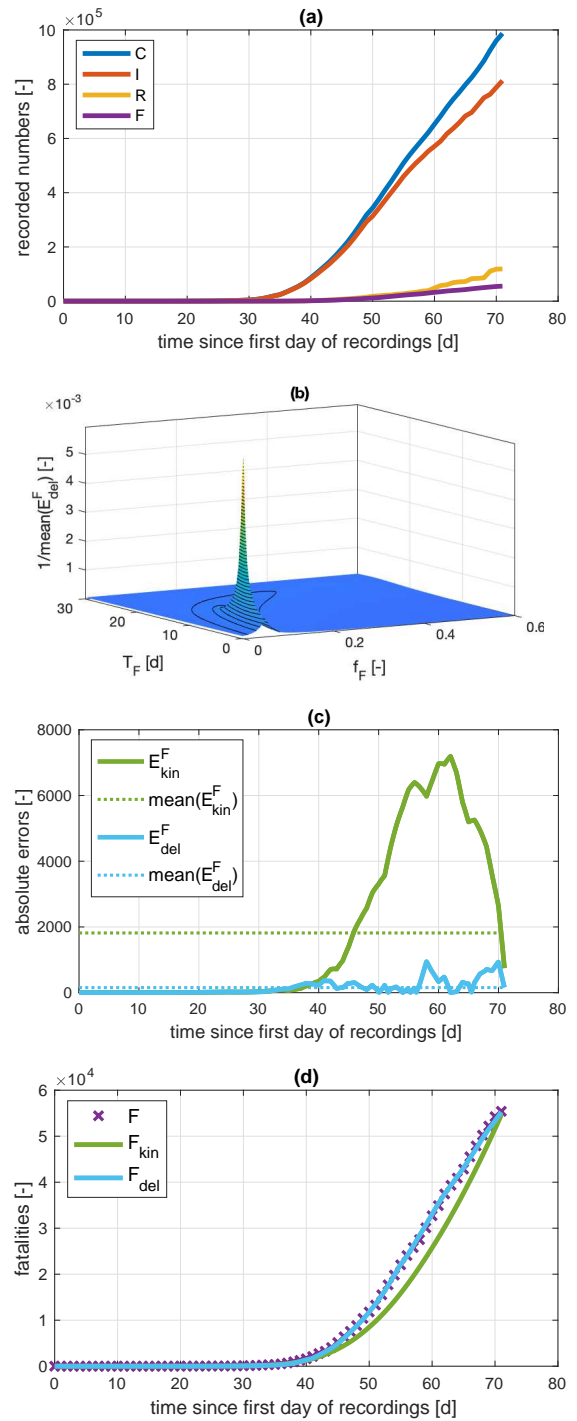

Figure 57: (a) Recorded data, (b) results of optimization based on infection-to-death delay rule, (c) absolute errors based on optimized parameter estimates, and (d) comparison between model-predicted fatalities based on optimized parameter estimates and recorded fatalities for United States
